# Supplementary material for: Taxonomic, Genomic, and Functional Variation in the Gut Microbiomes of Wild Spotted Hyenas Across 2 Decades of Study
Source: PubMed Central journal article supplement (PMC9948708; doi:10.1128/msystems.00965-22), 2022-12-19

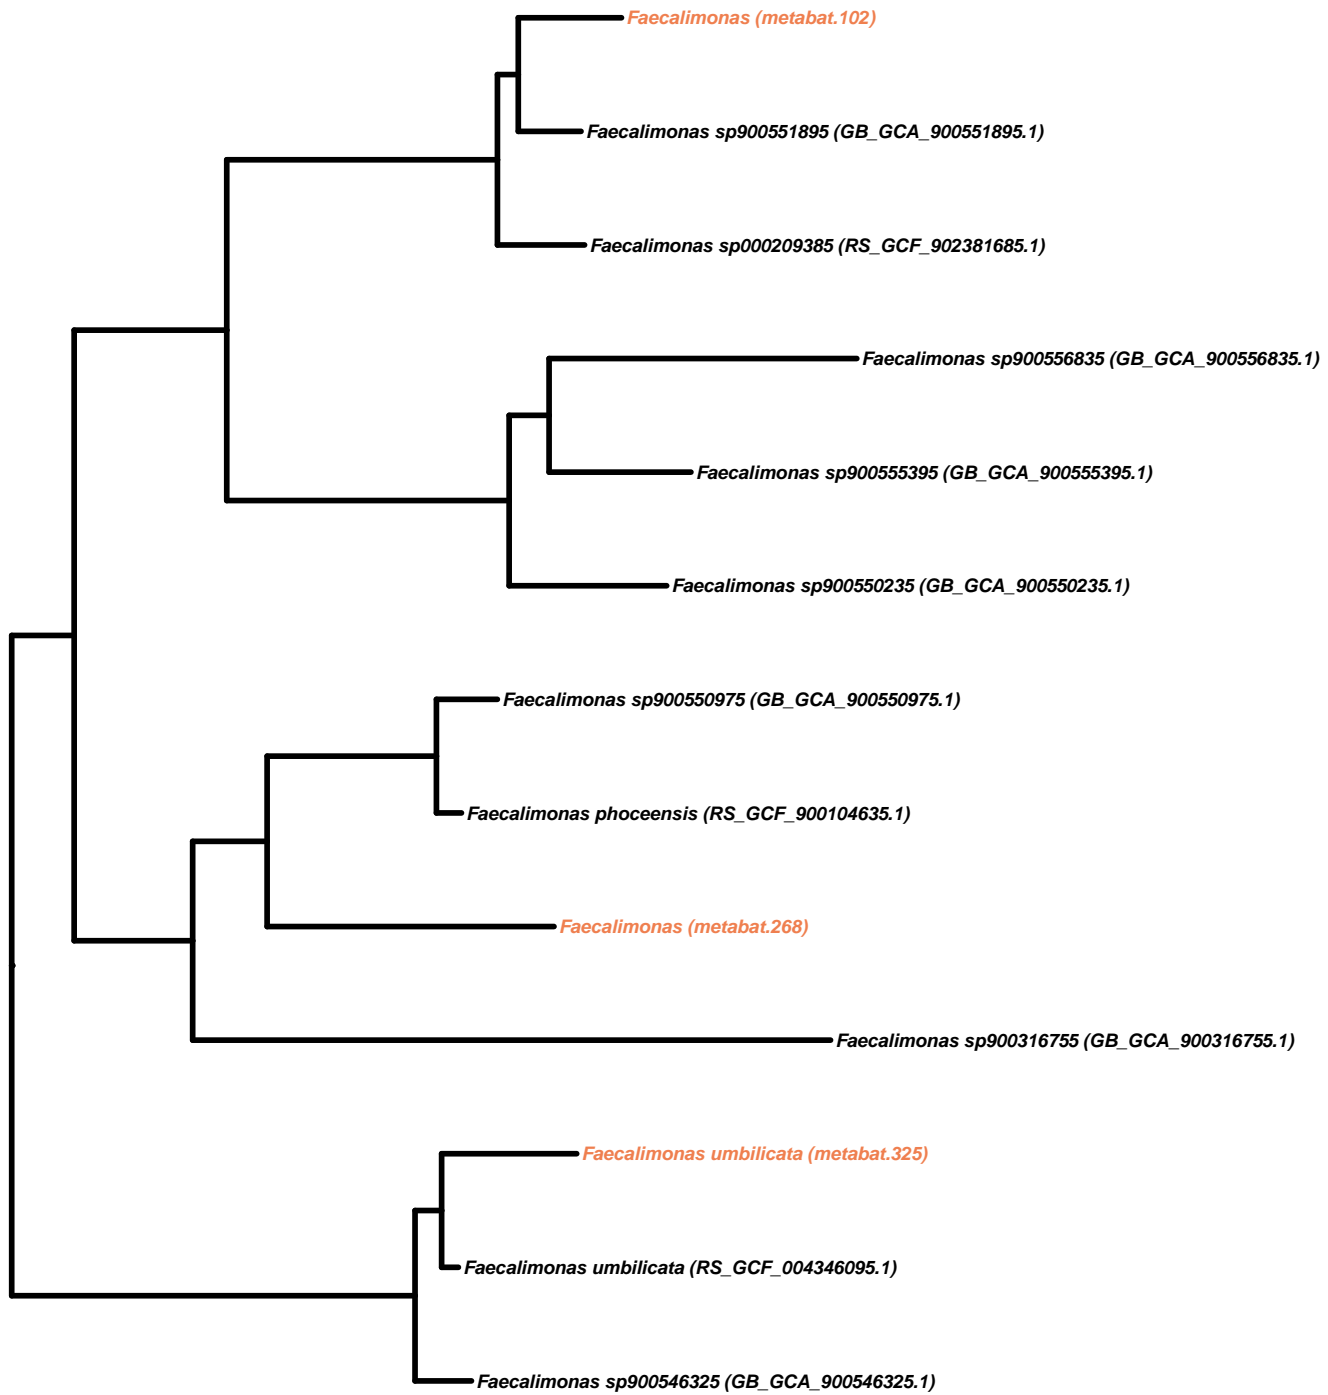

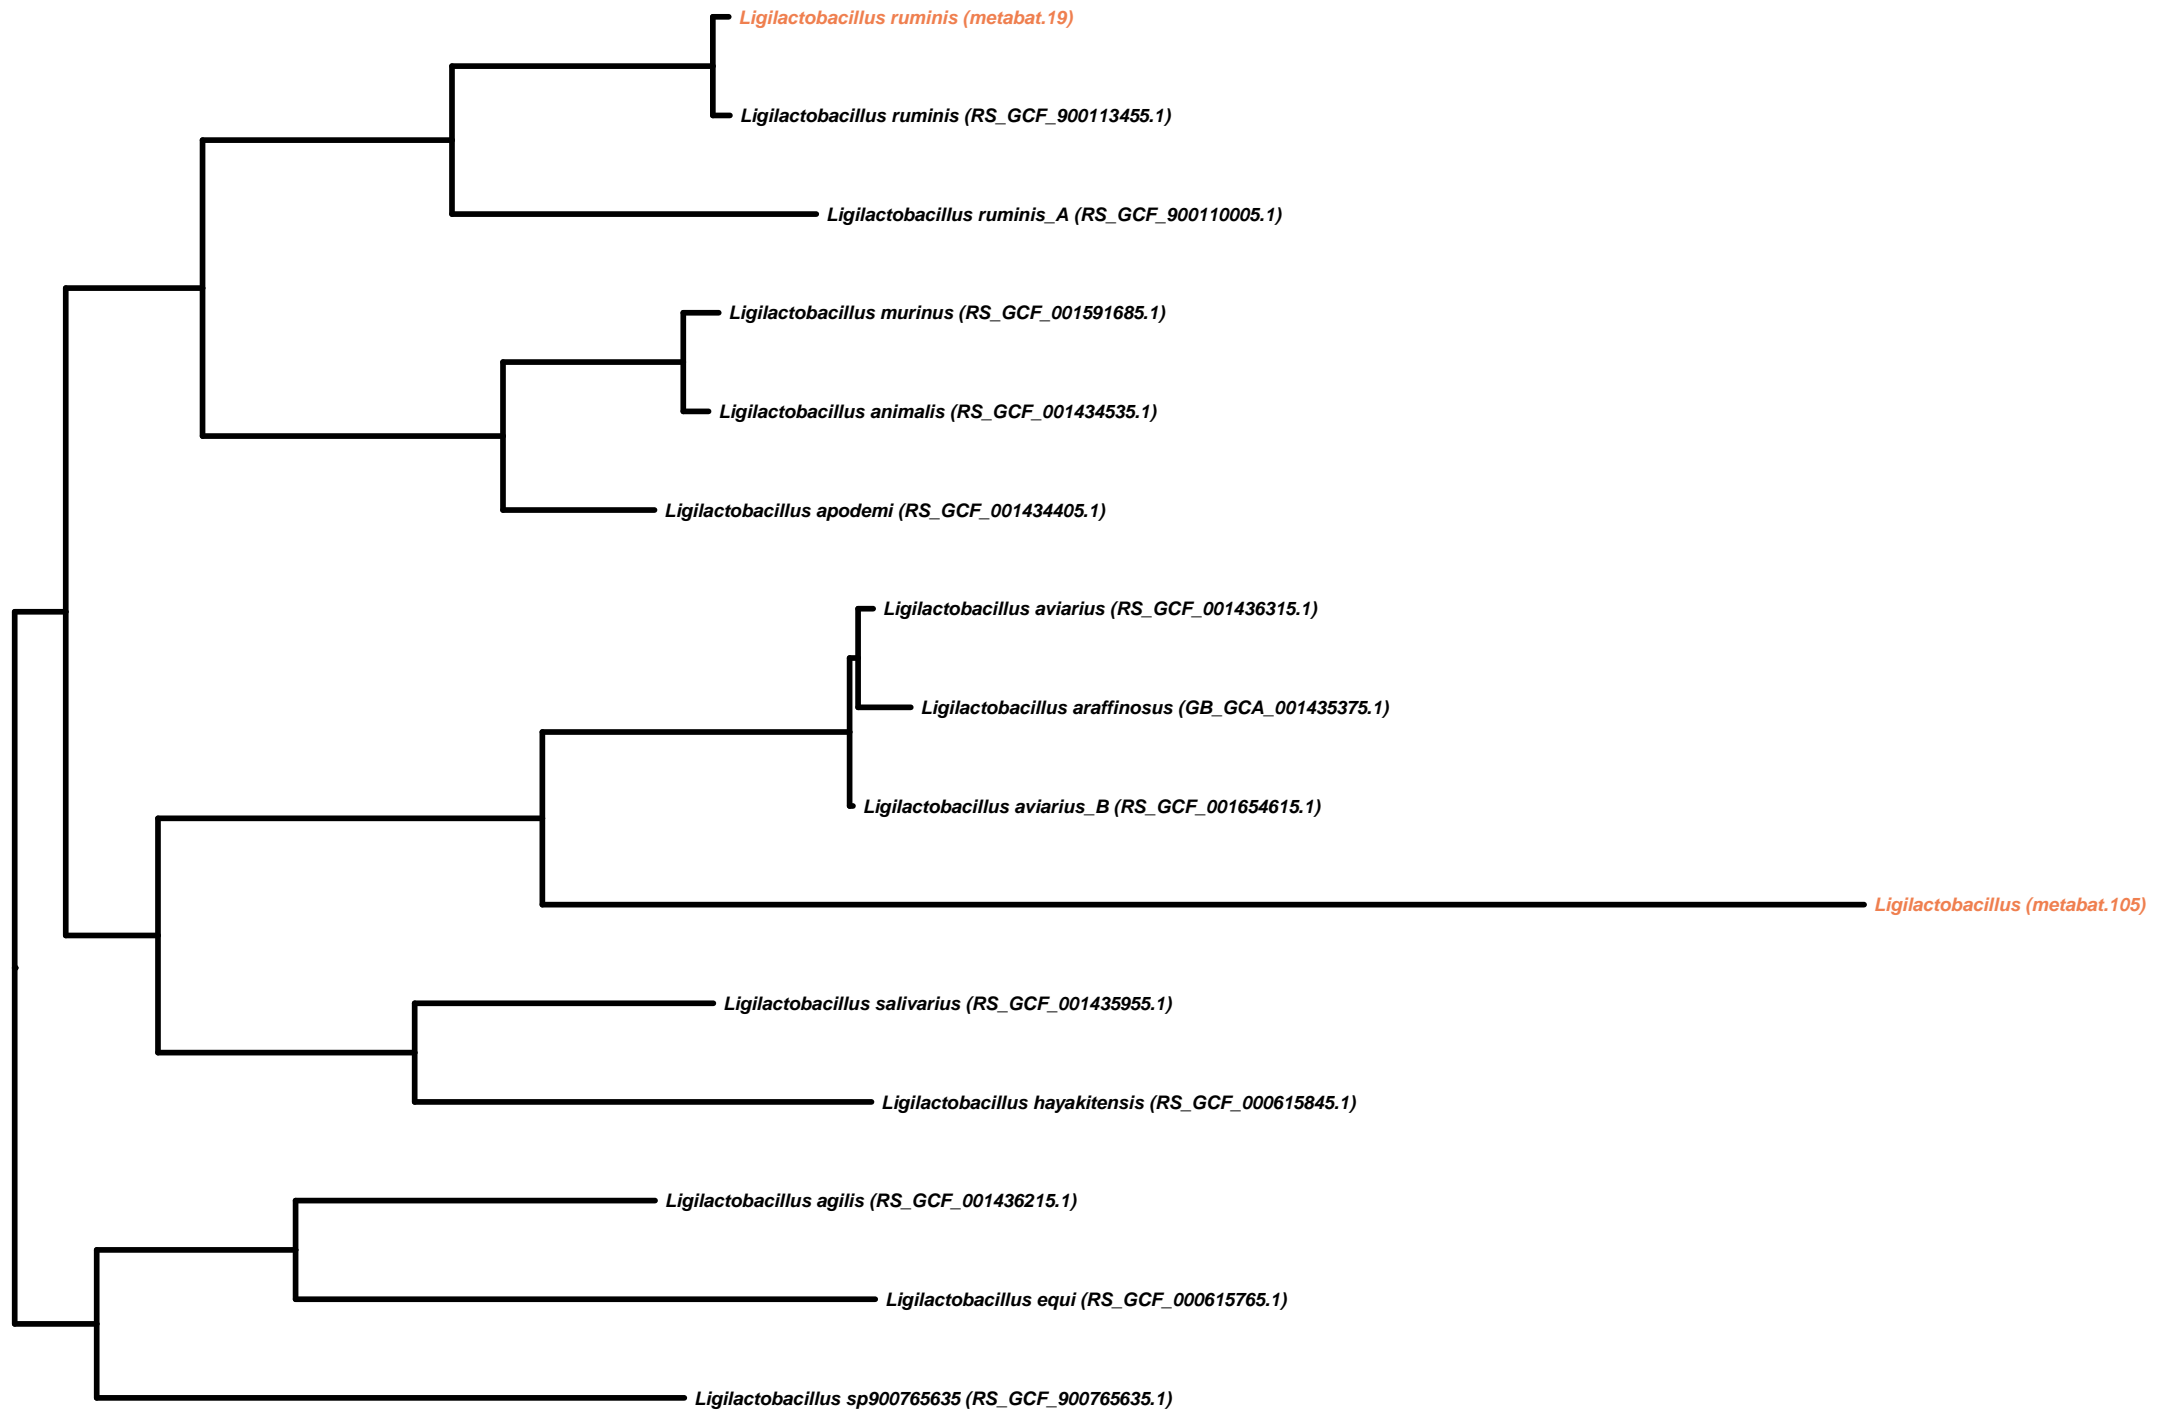

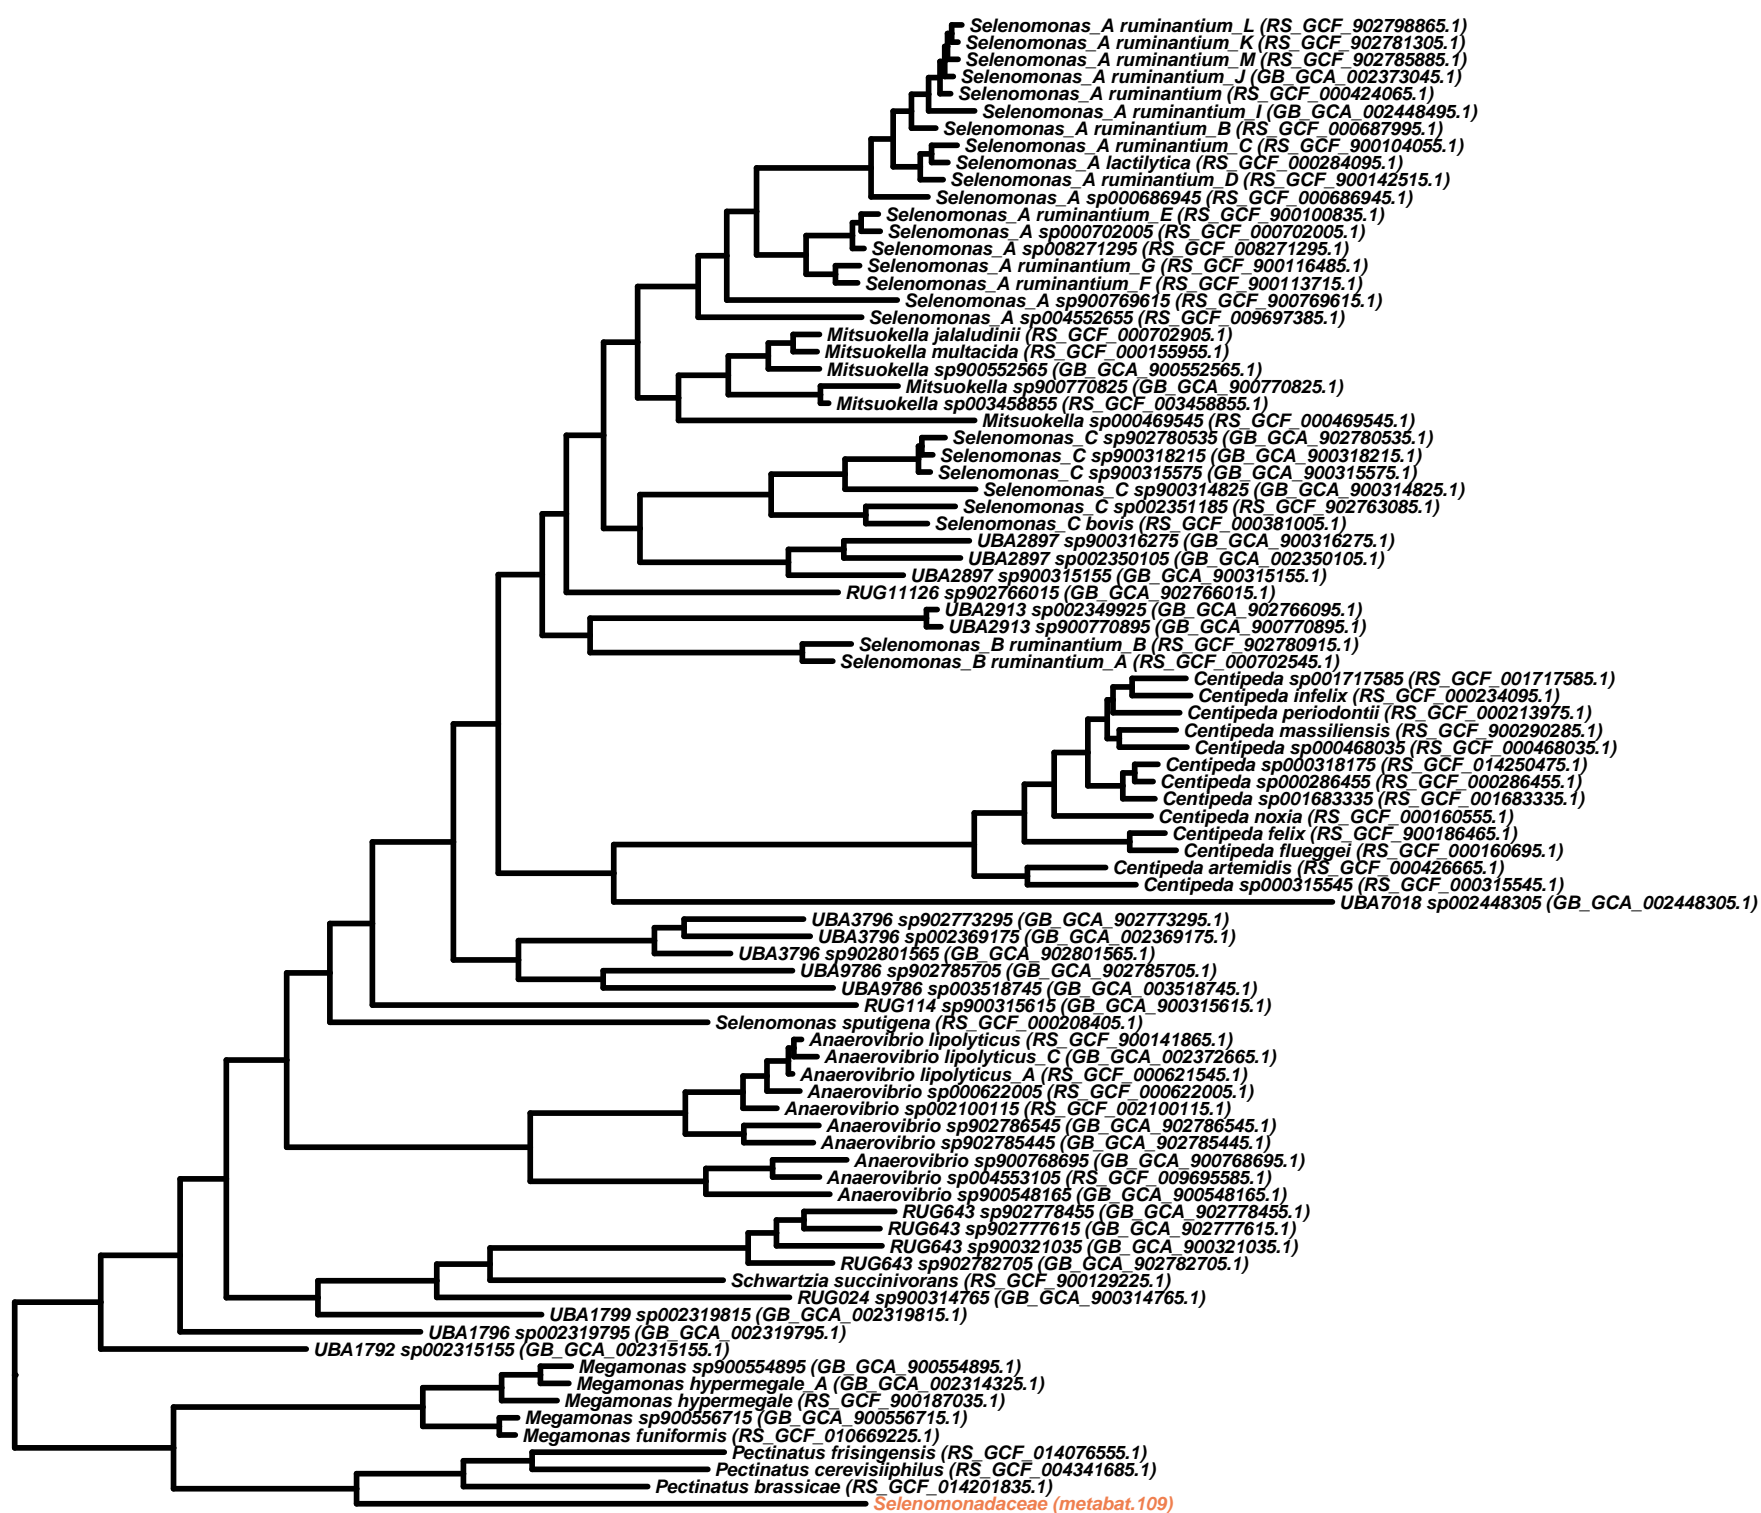

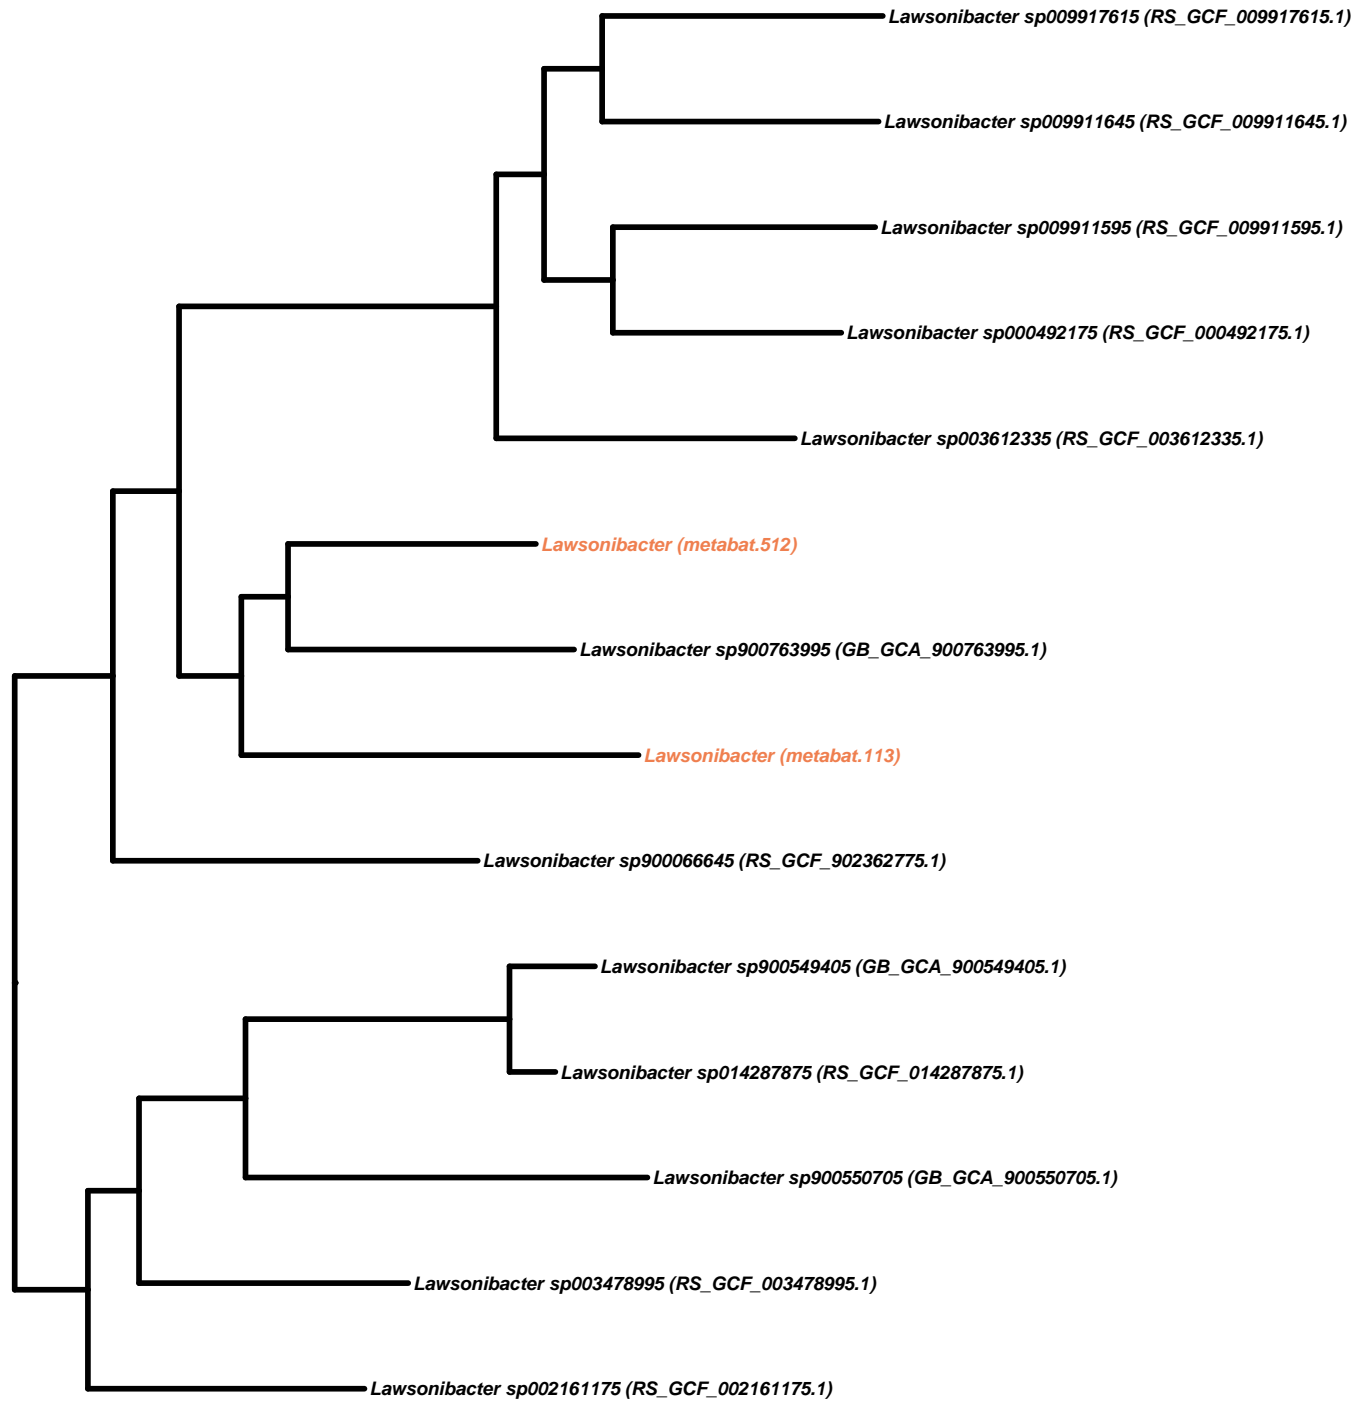

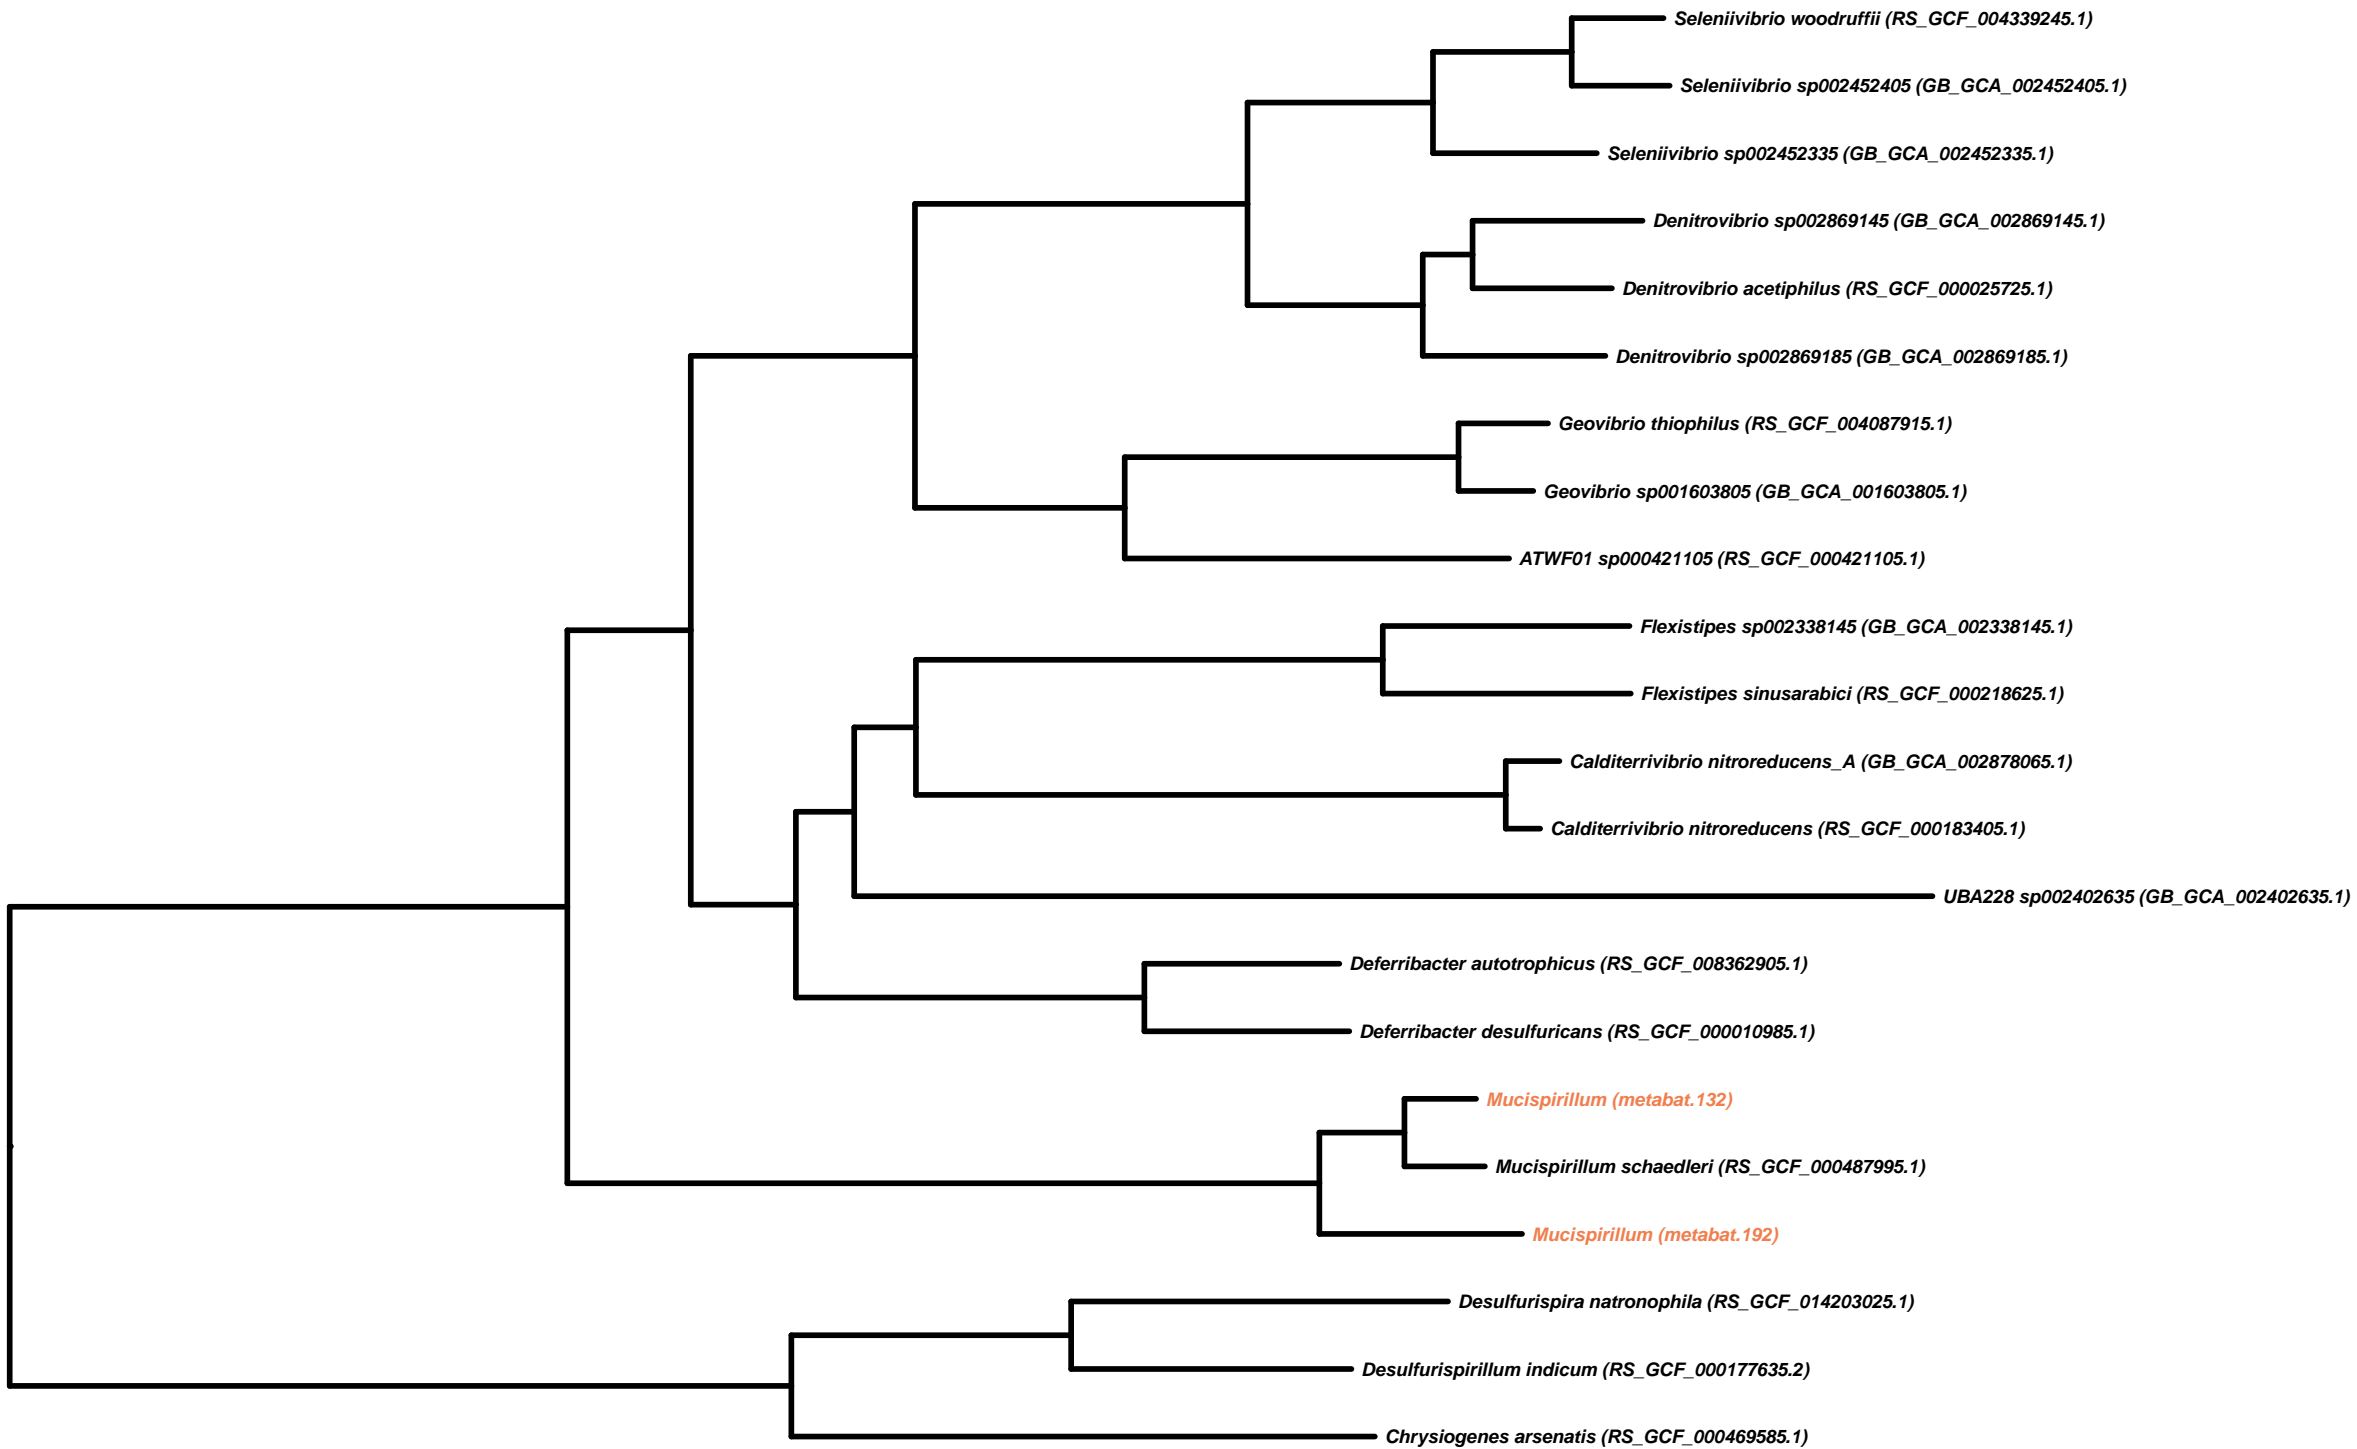

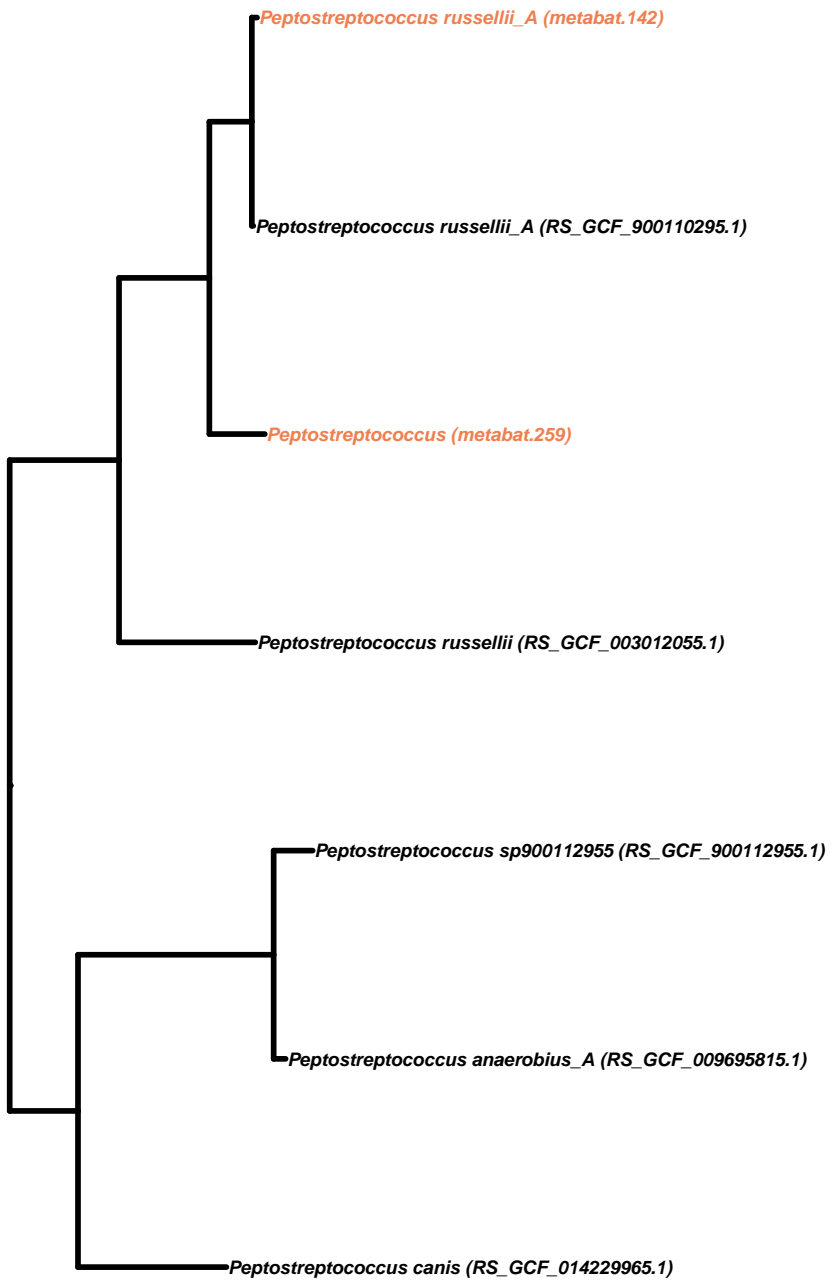

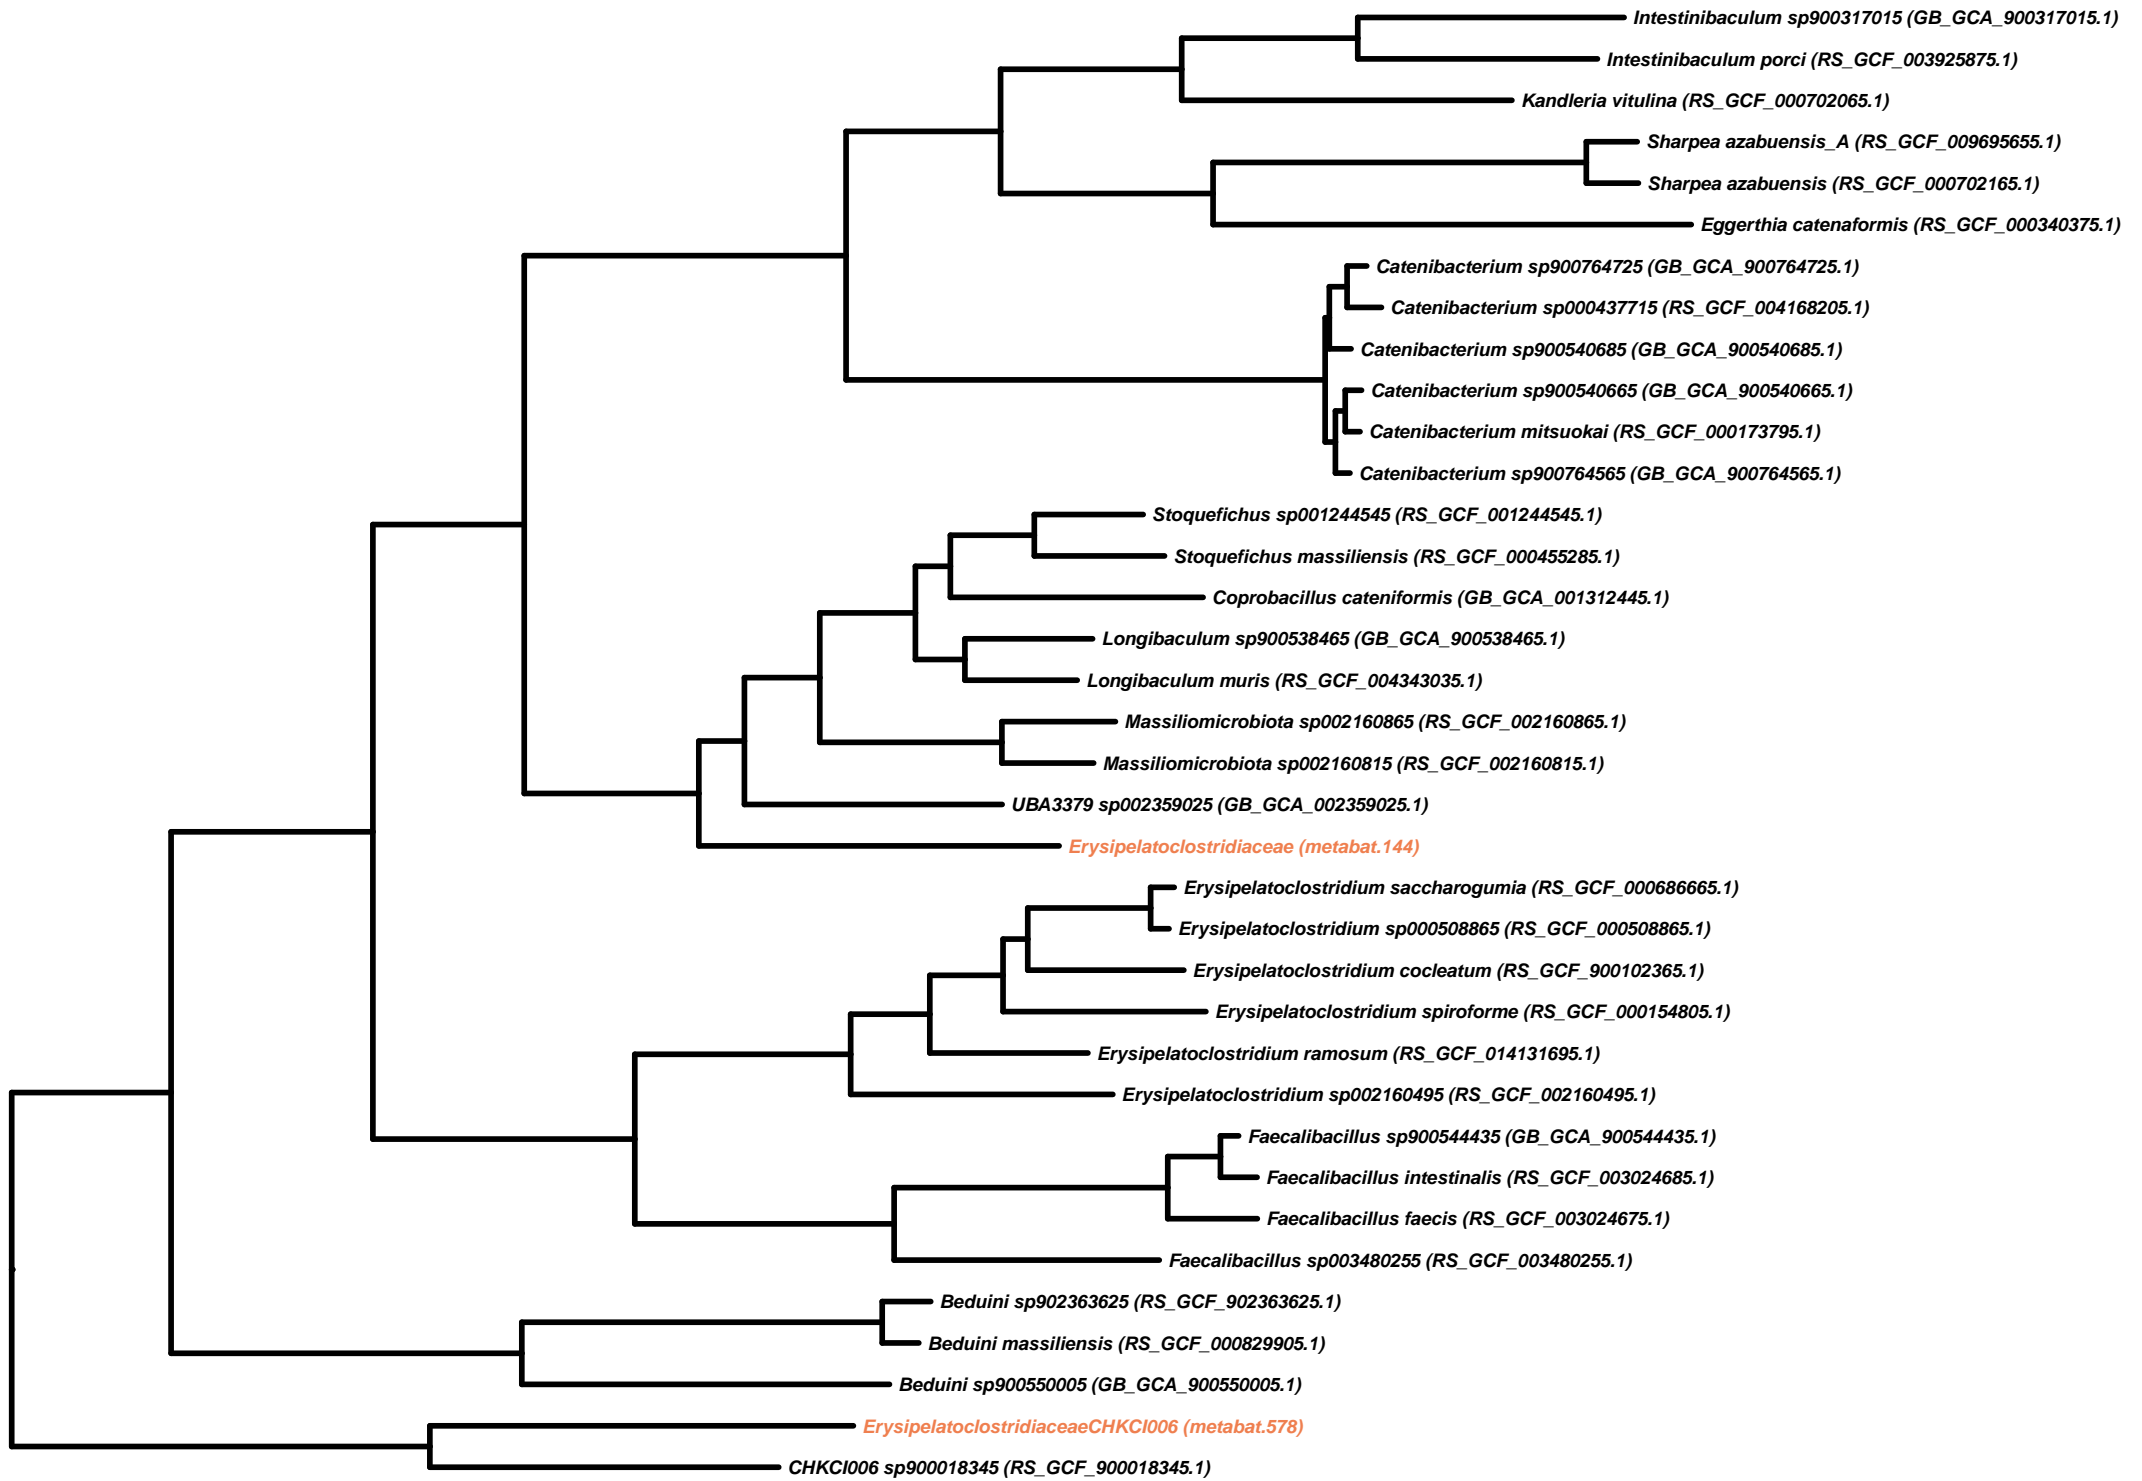

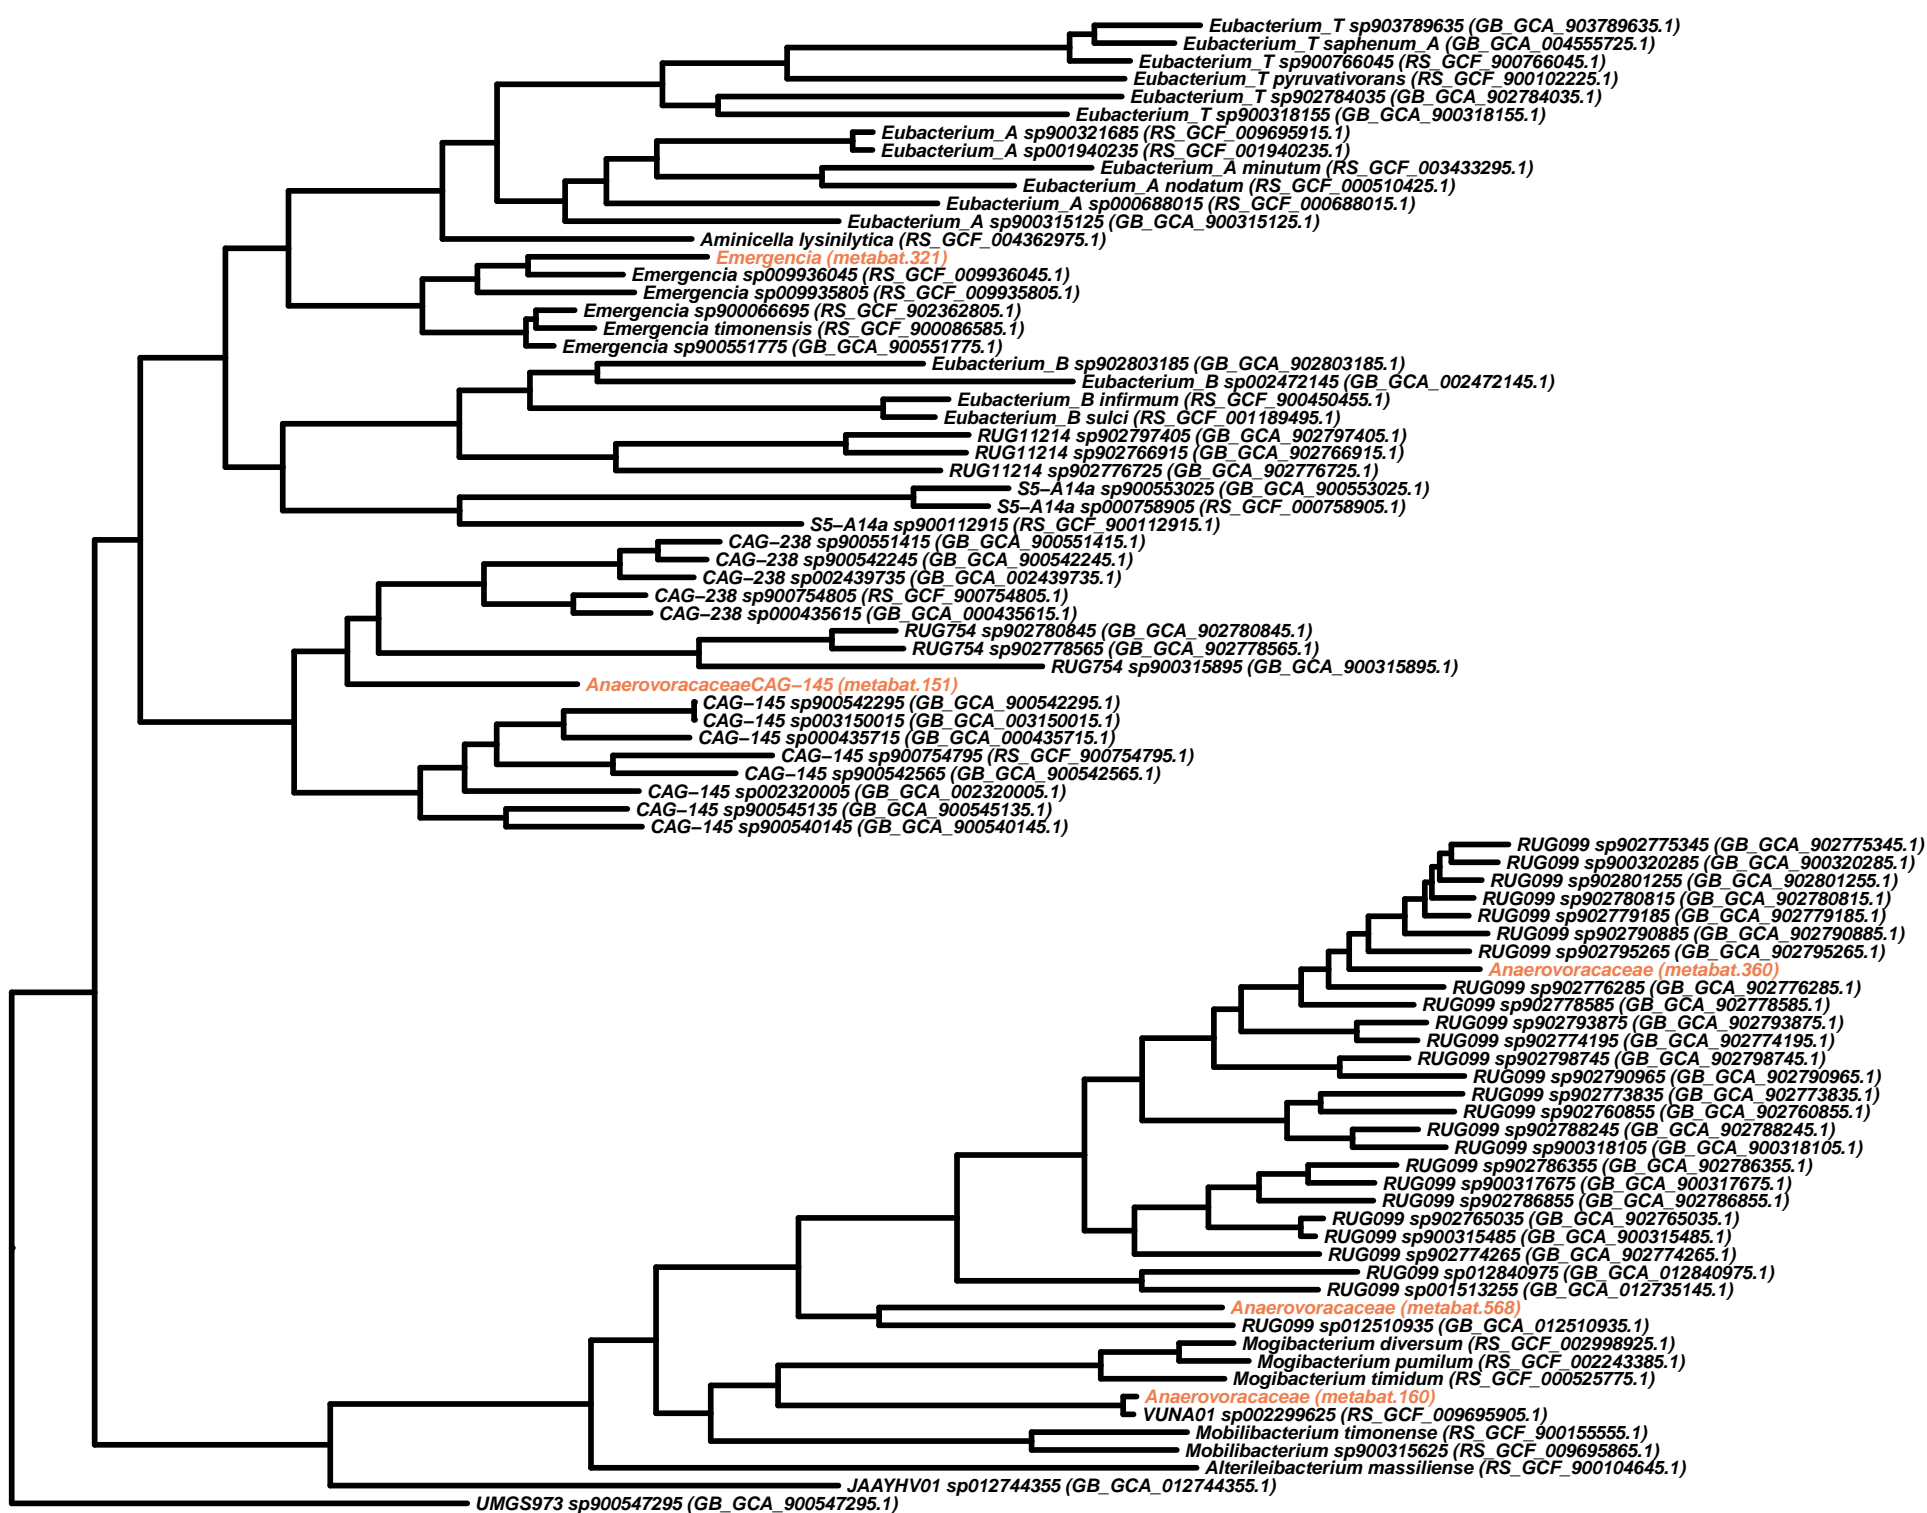



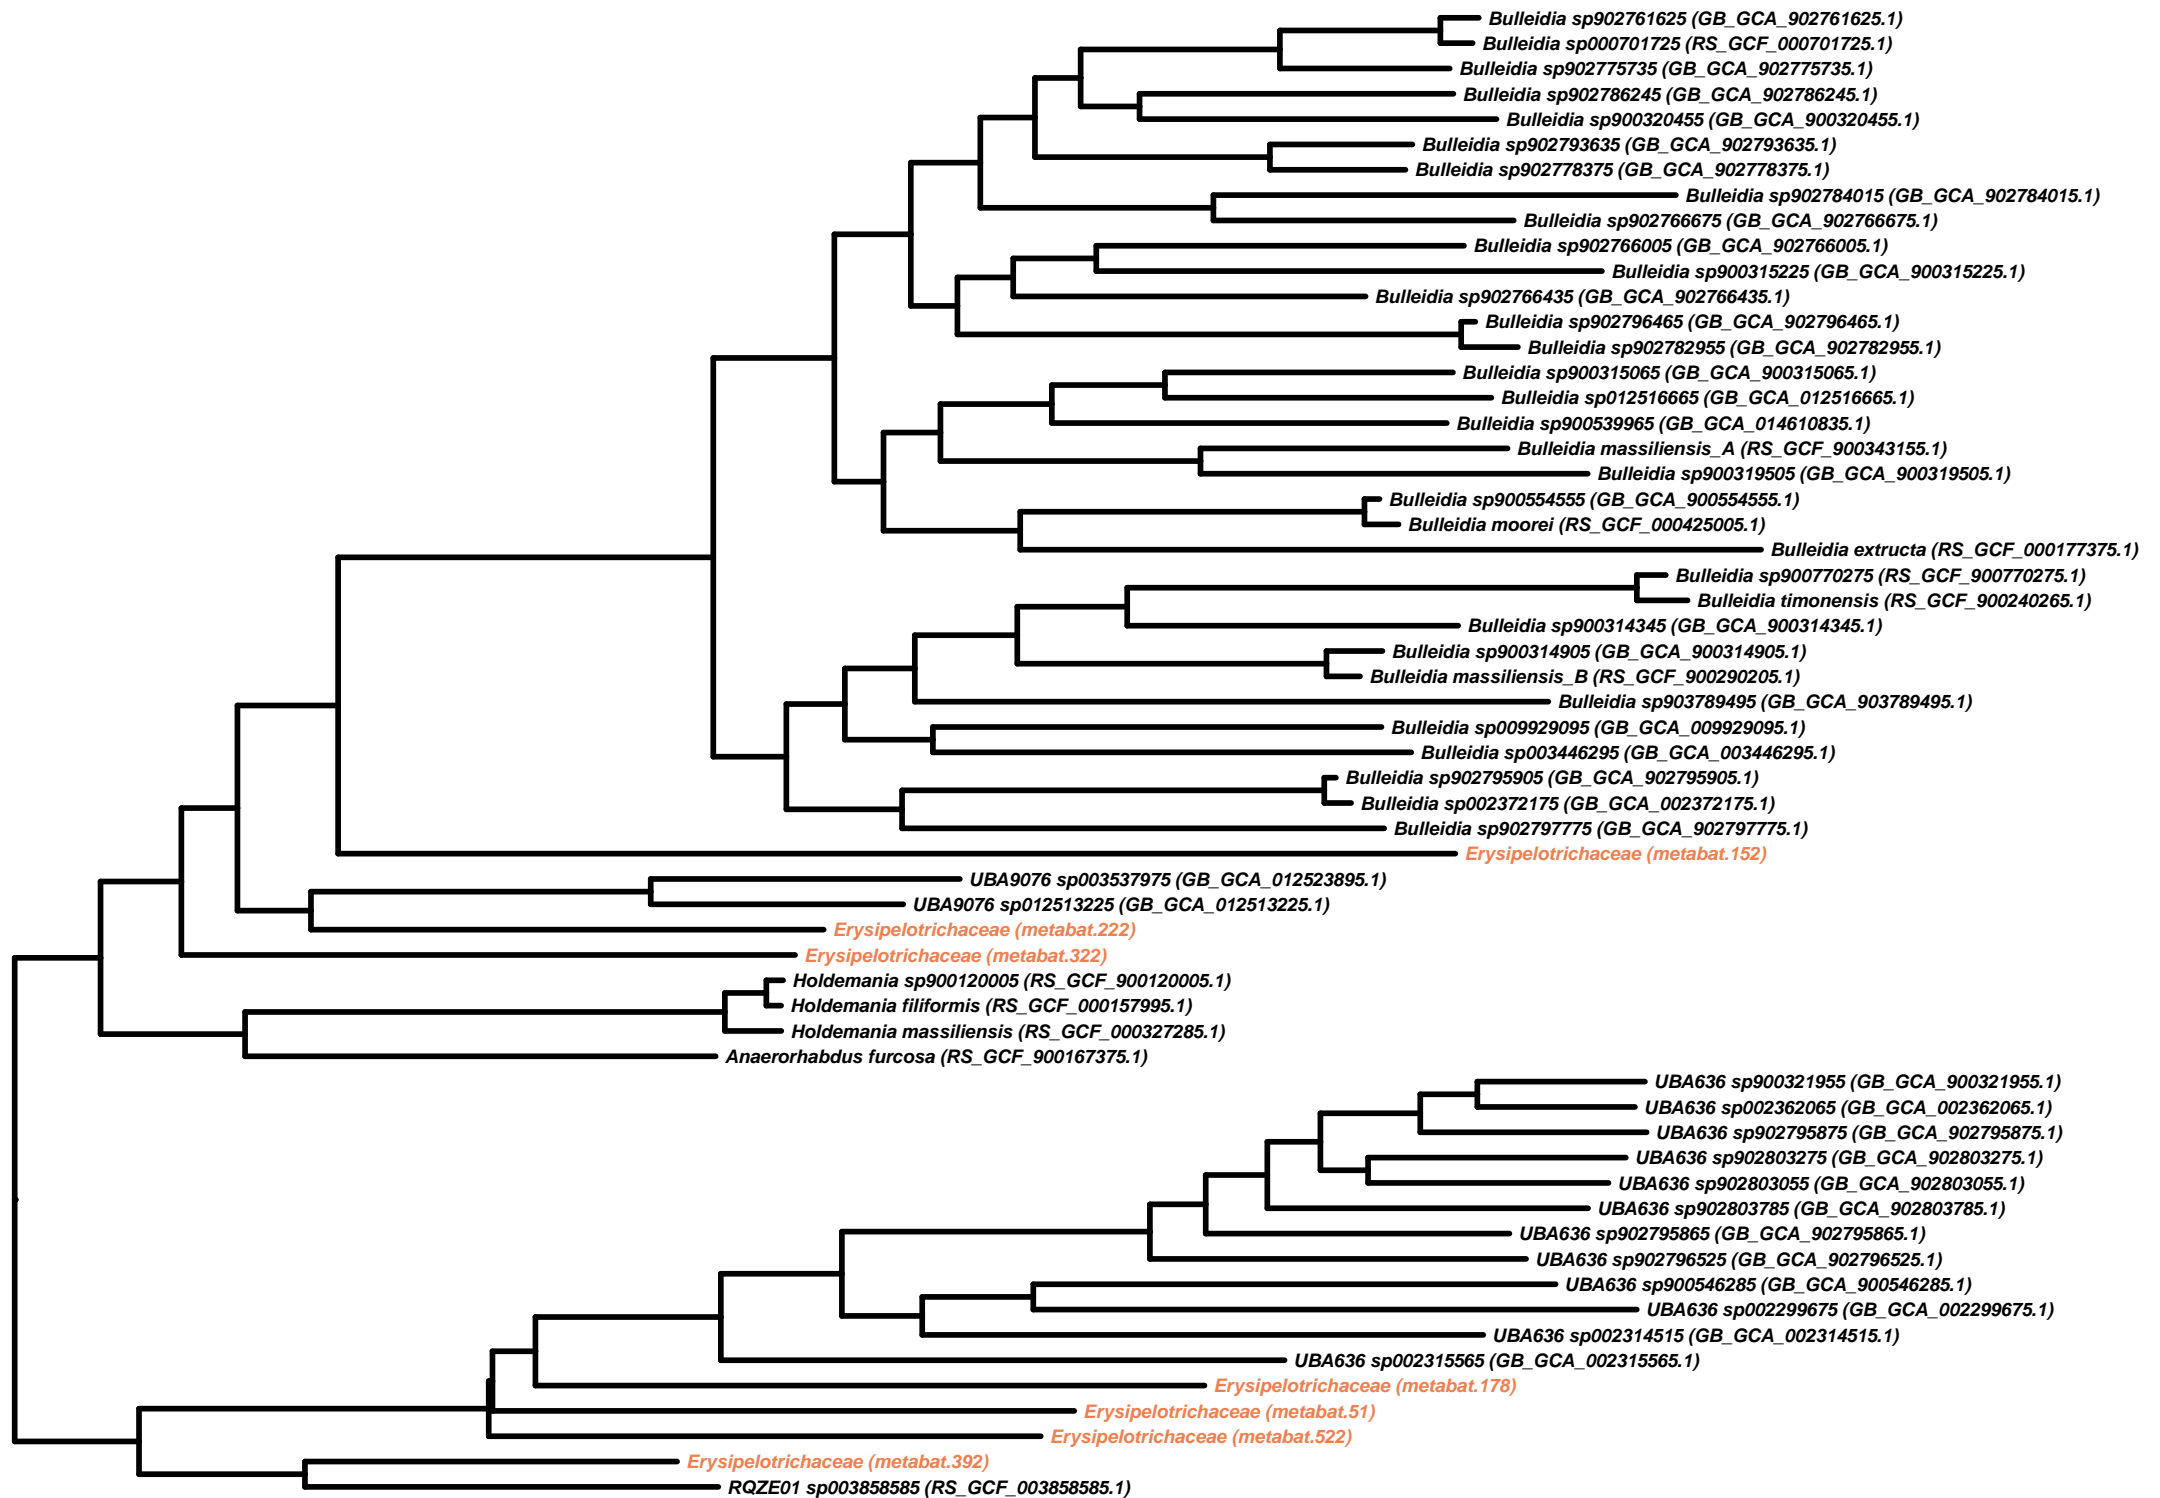

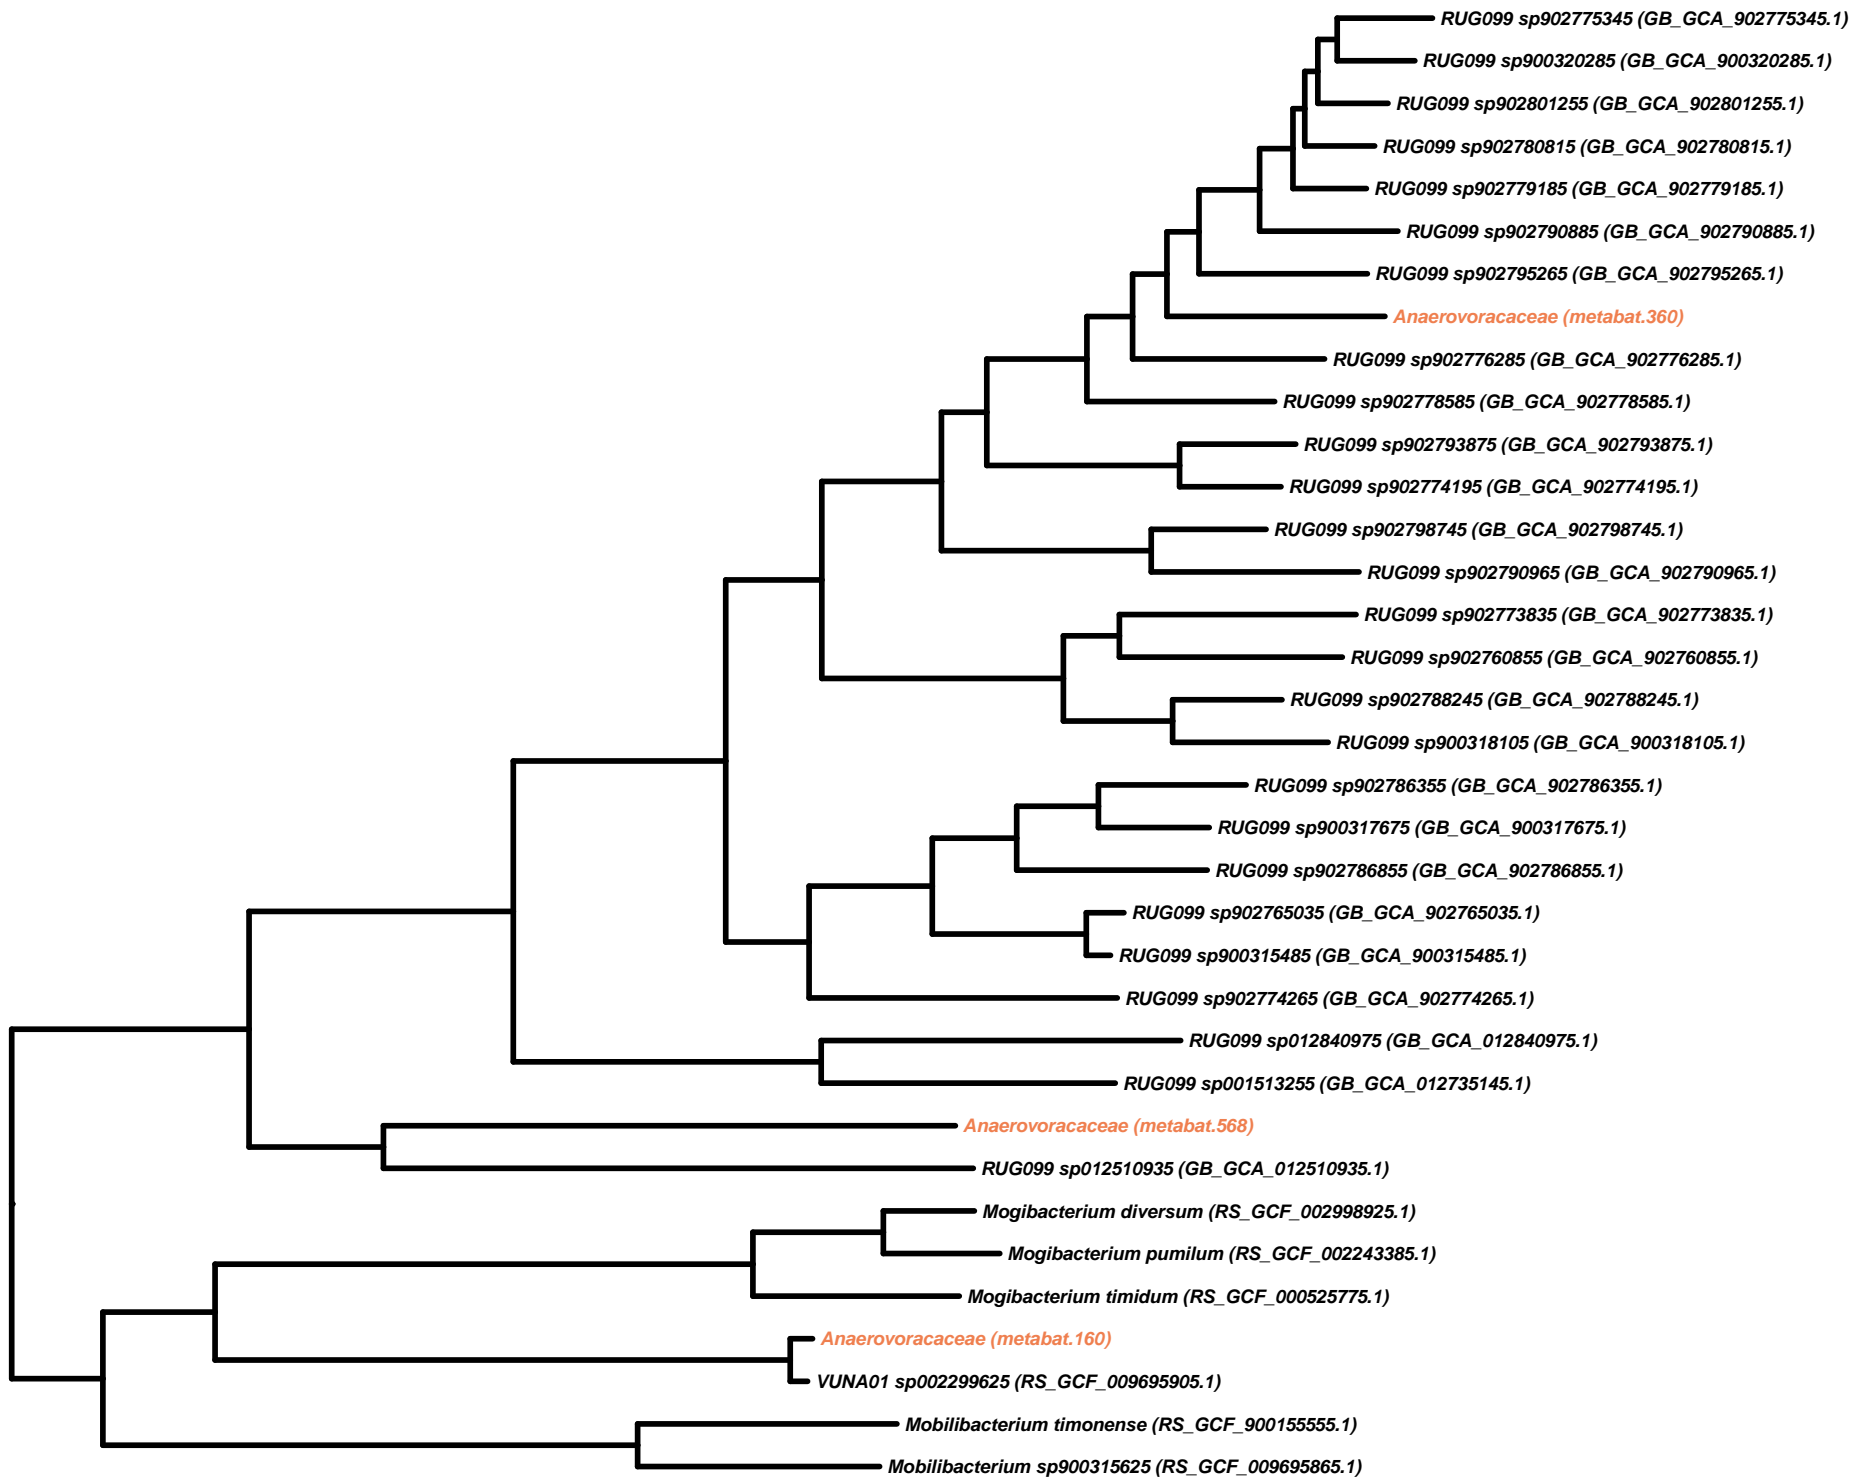

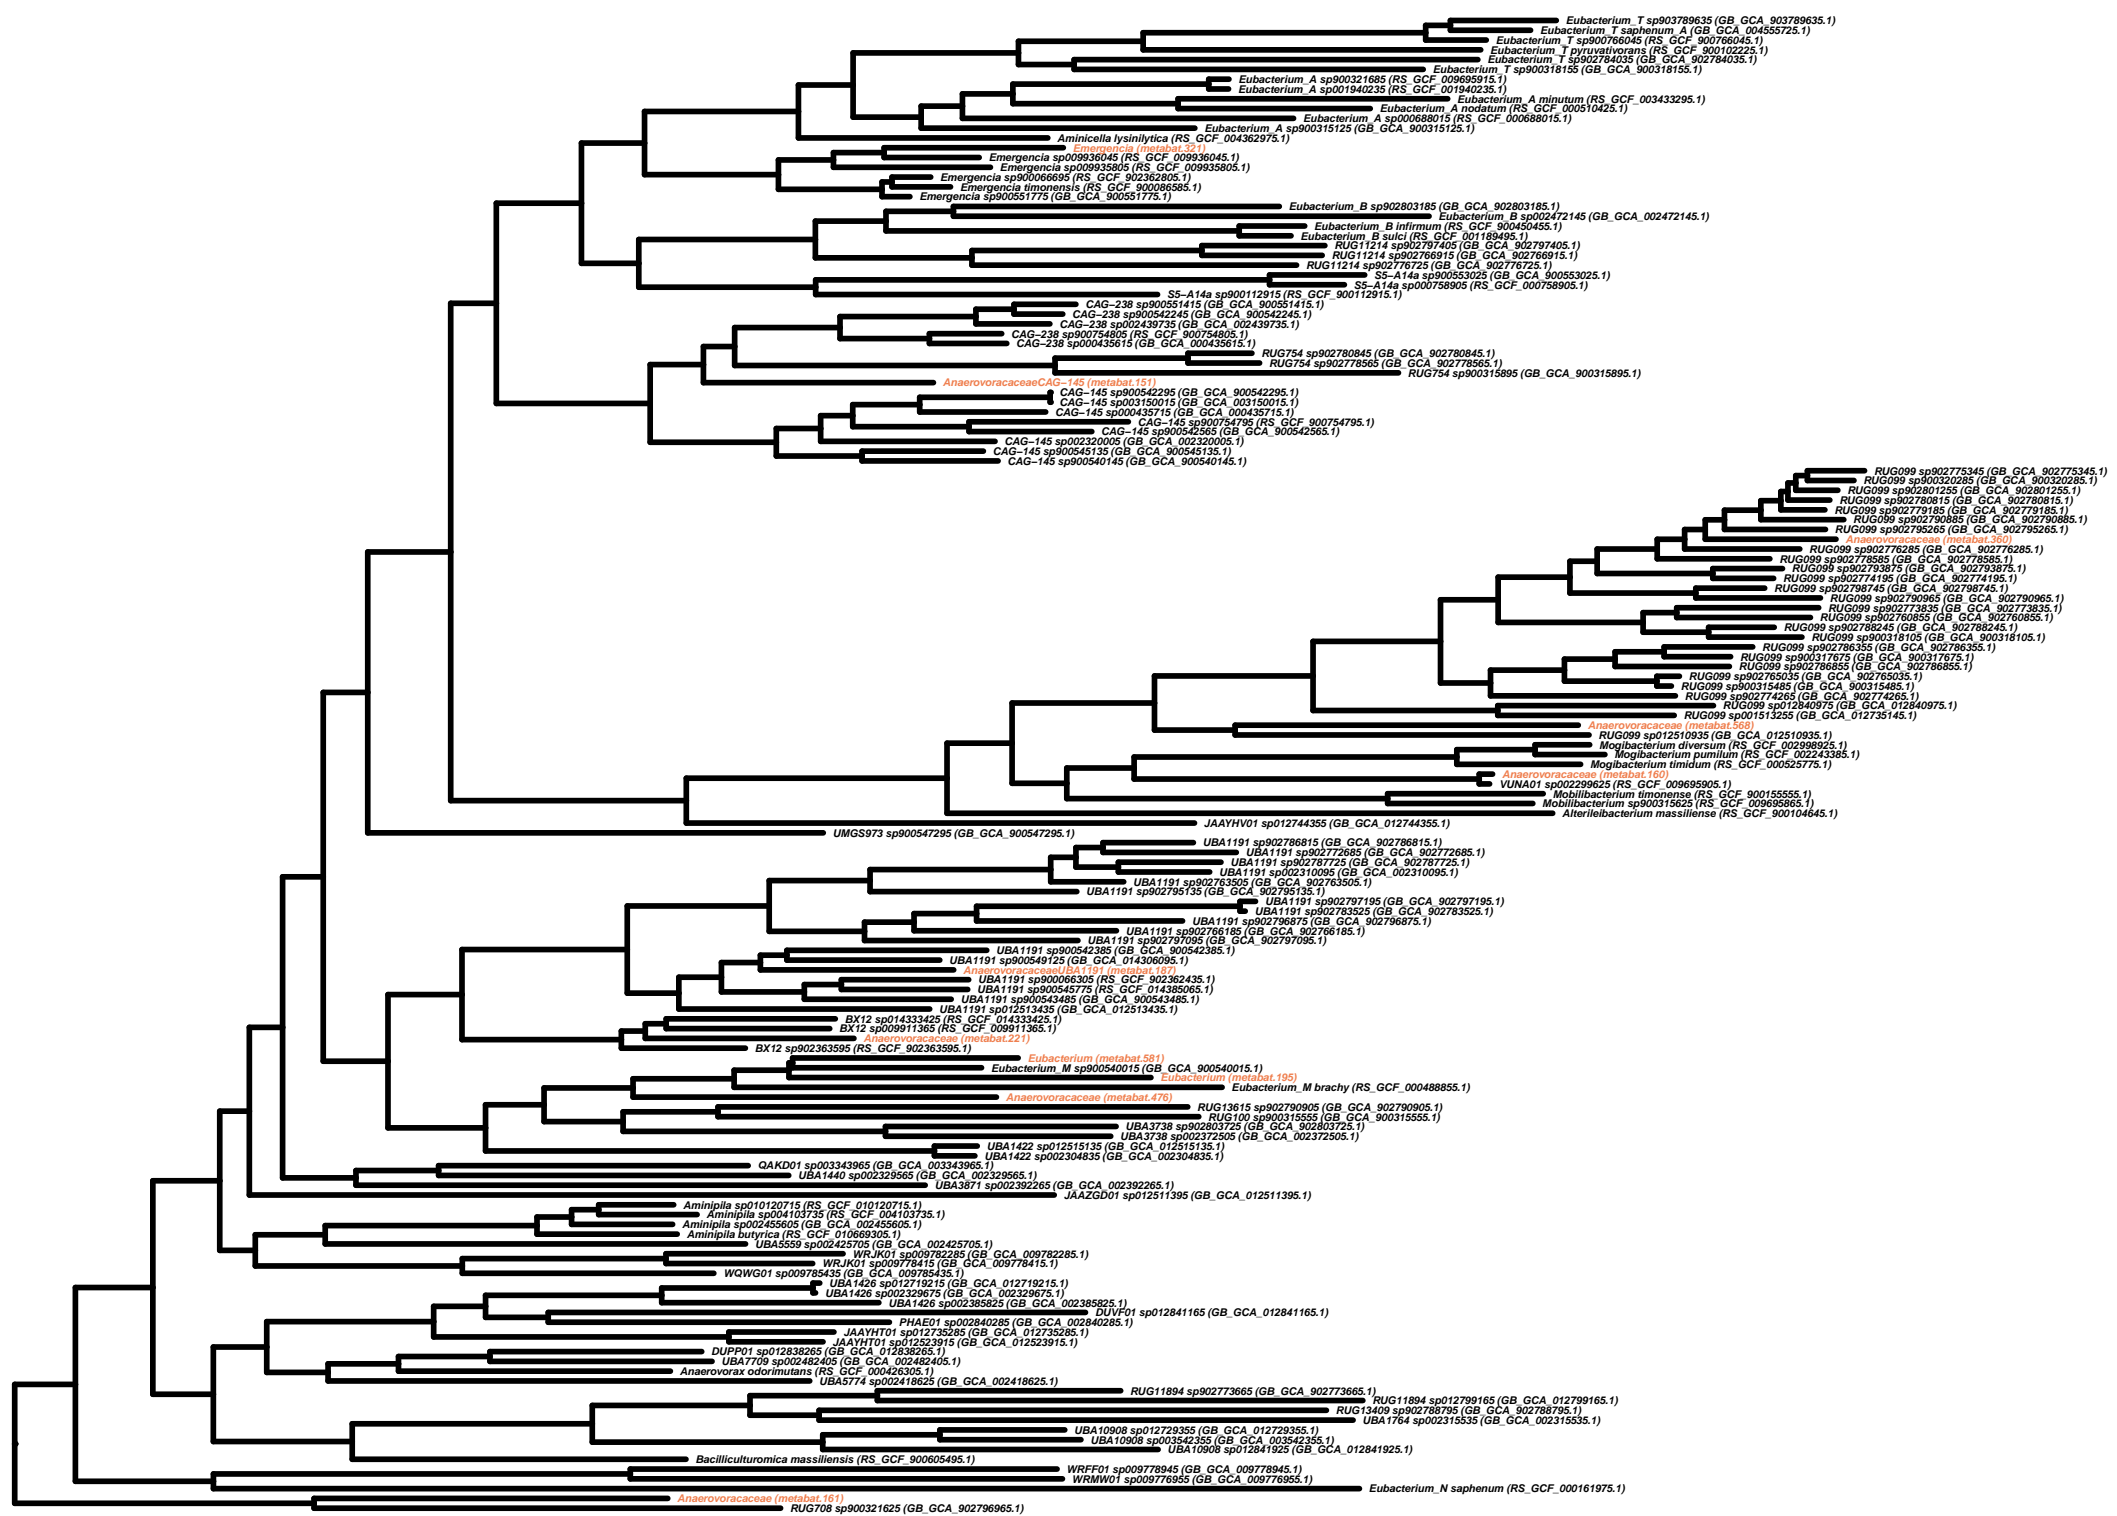

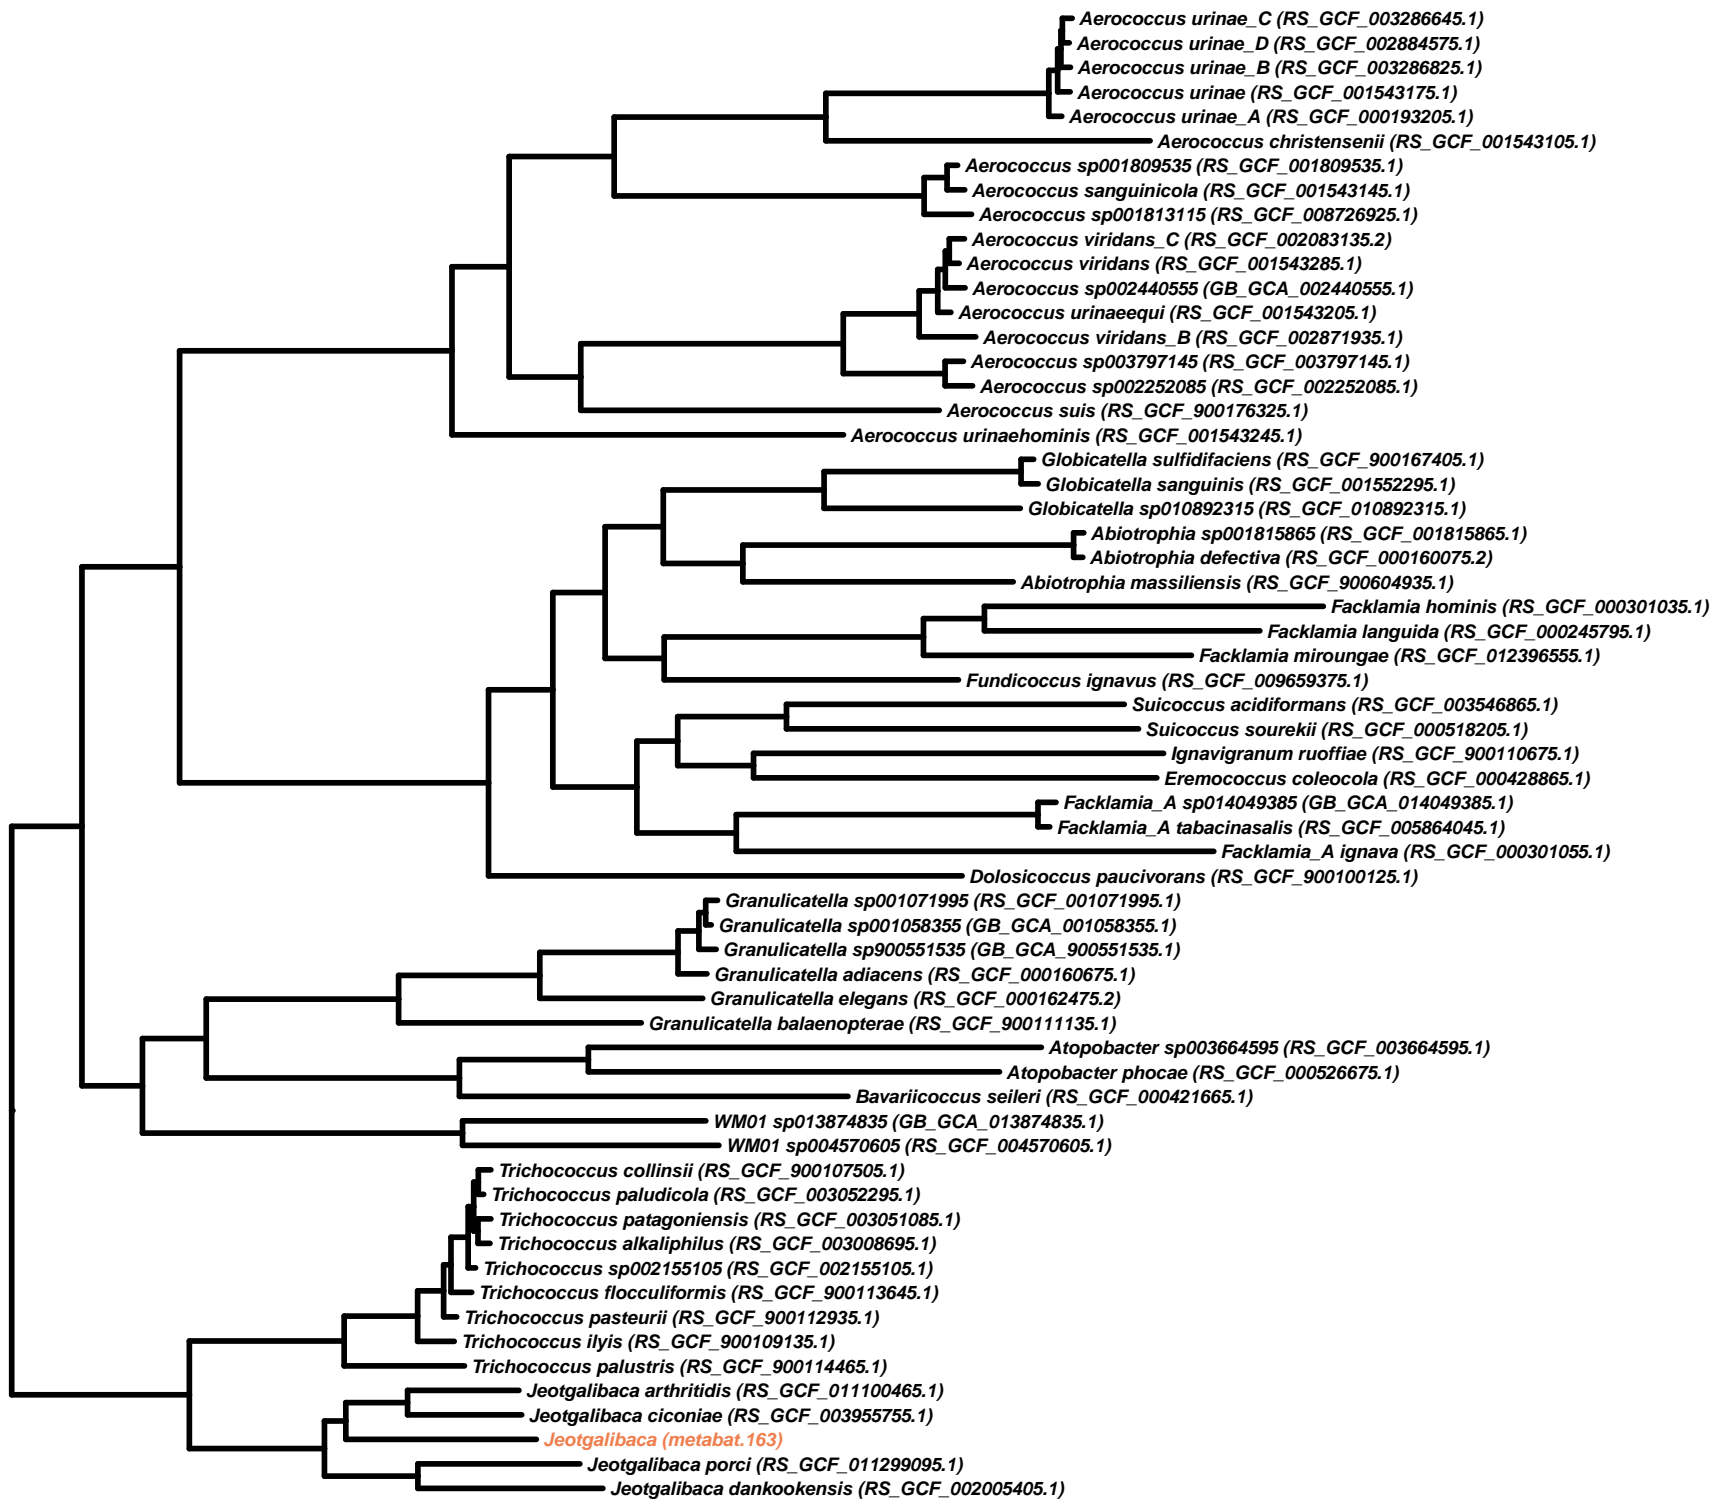

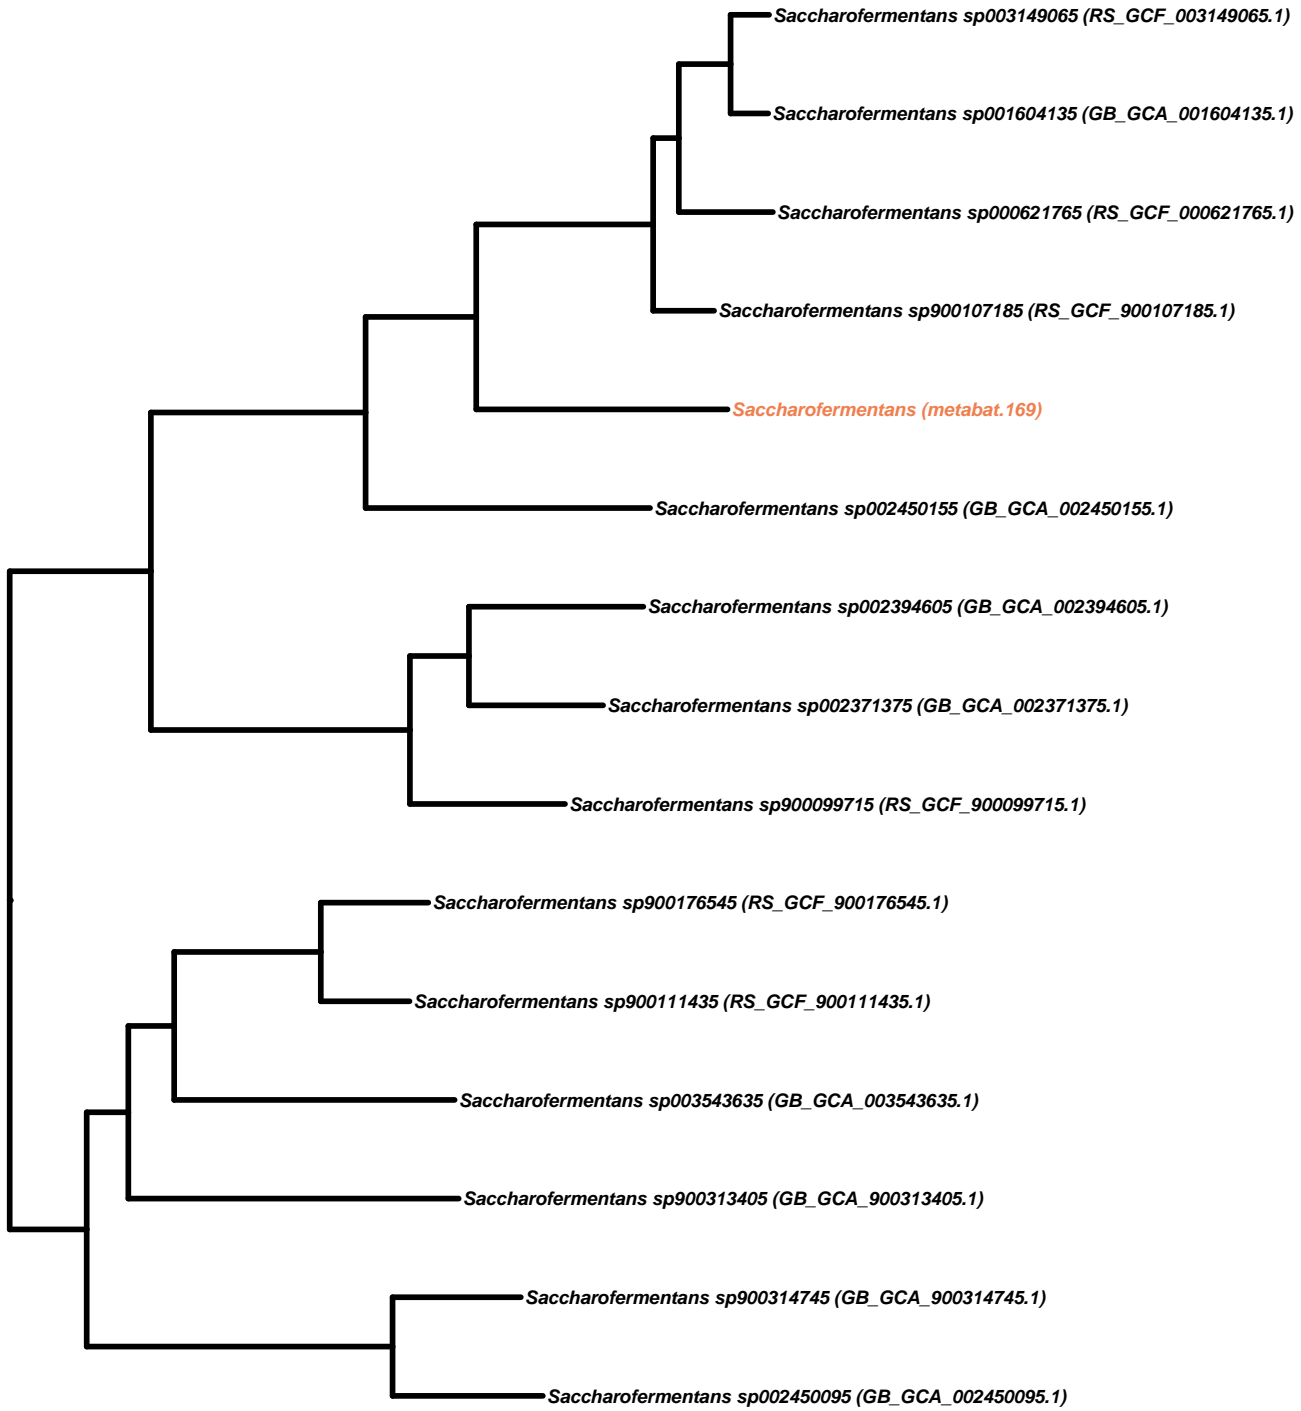

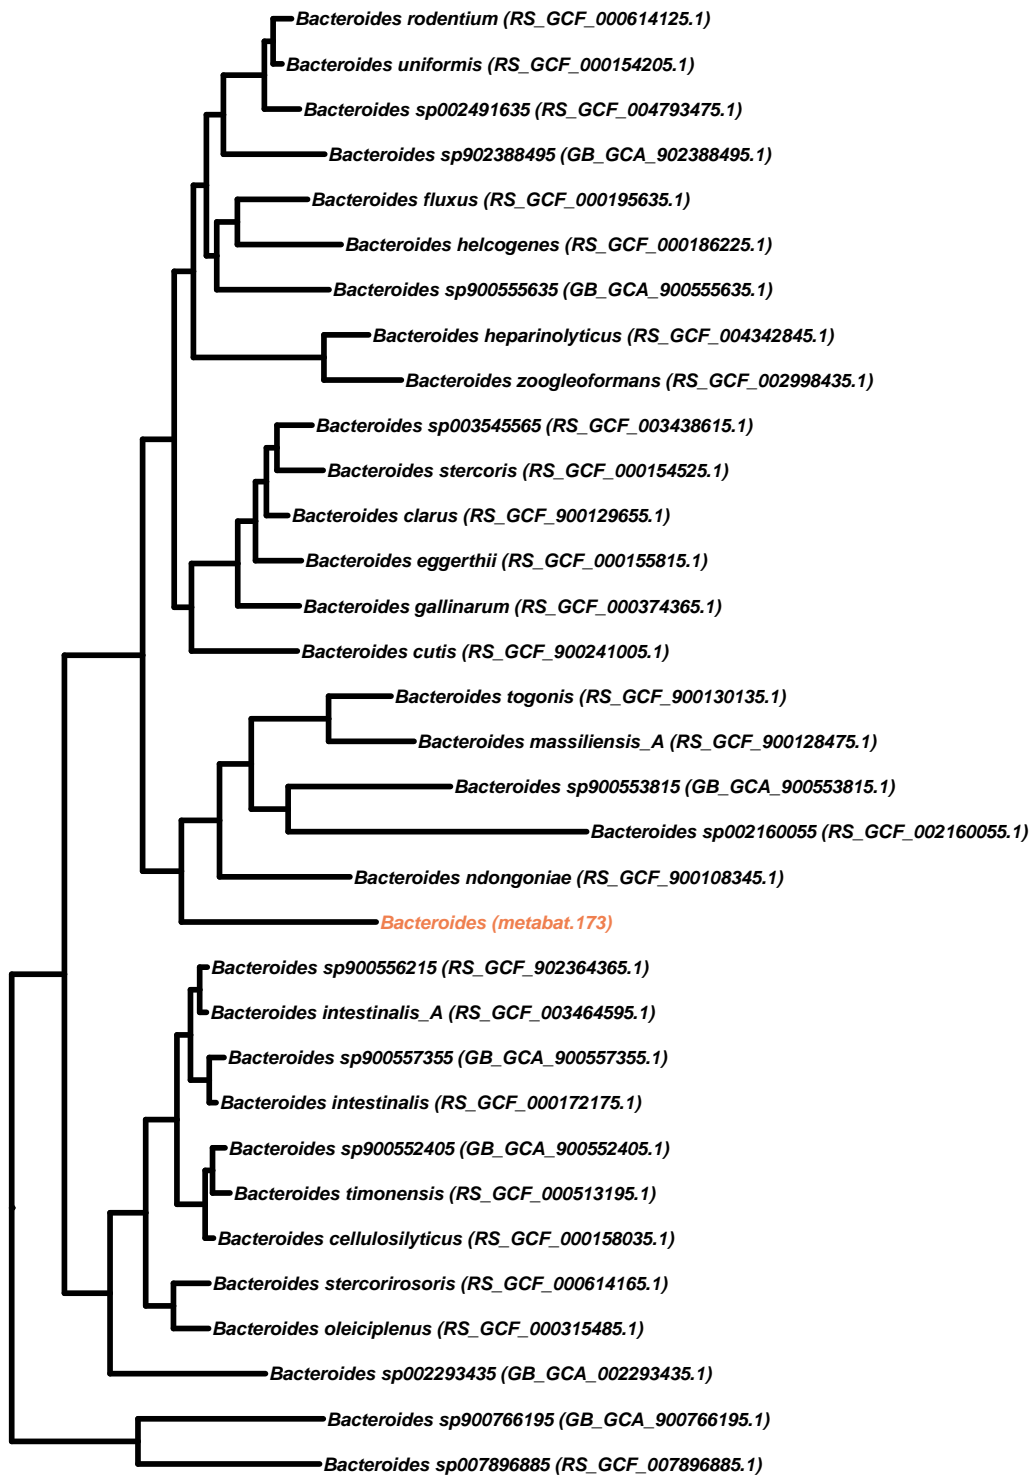

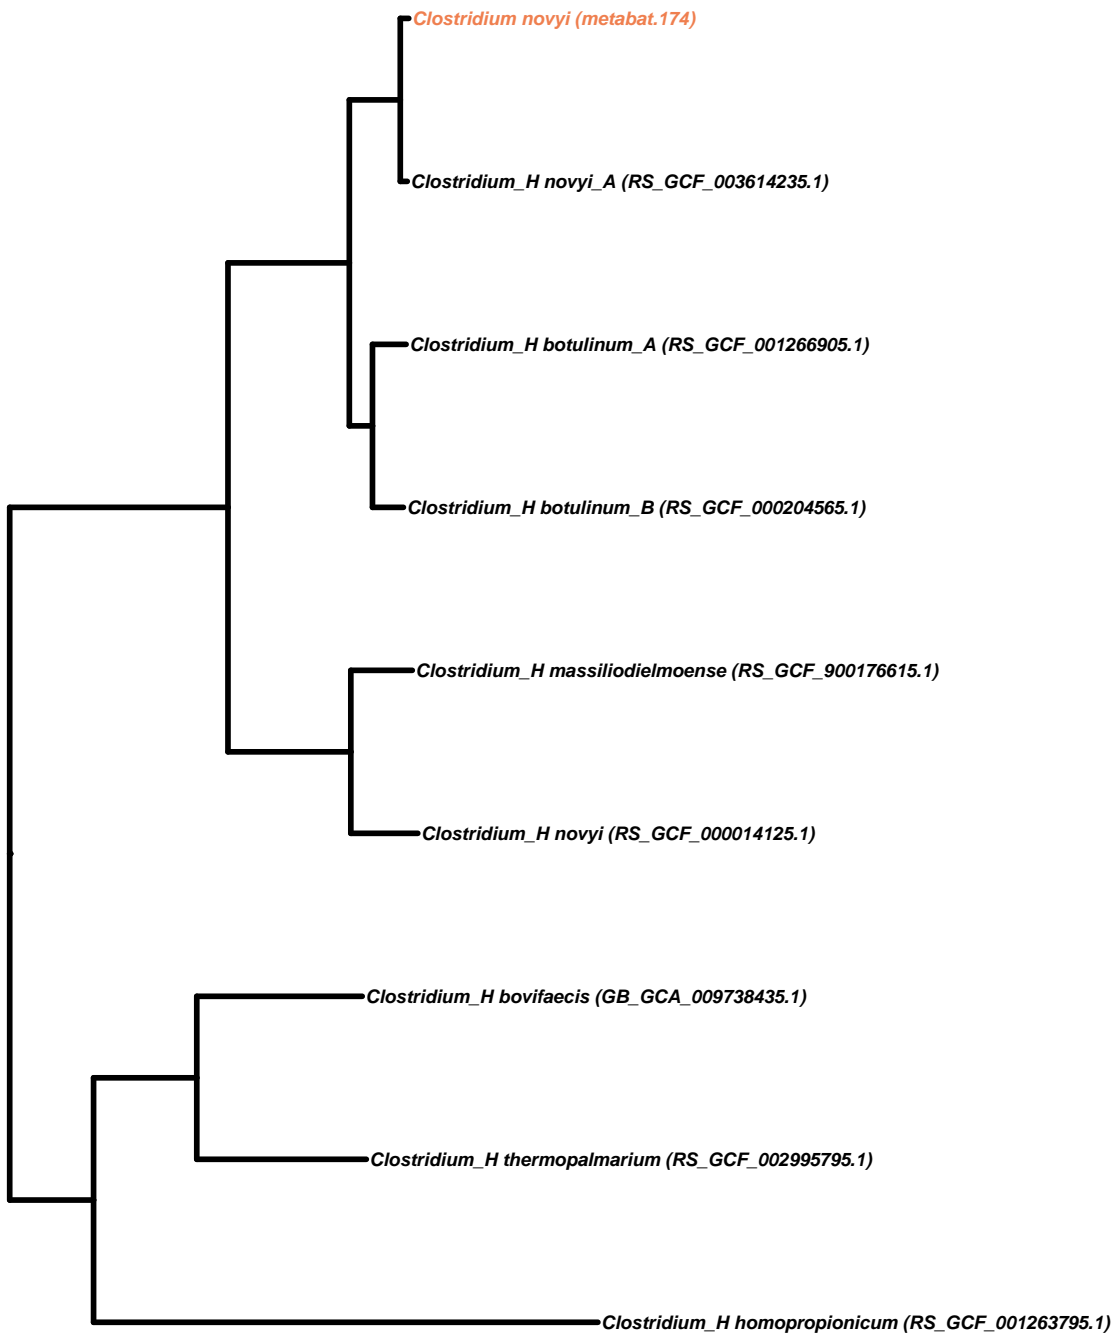

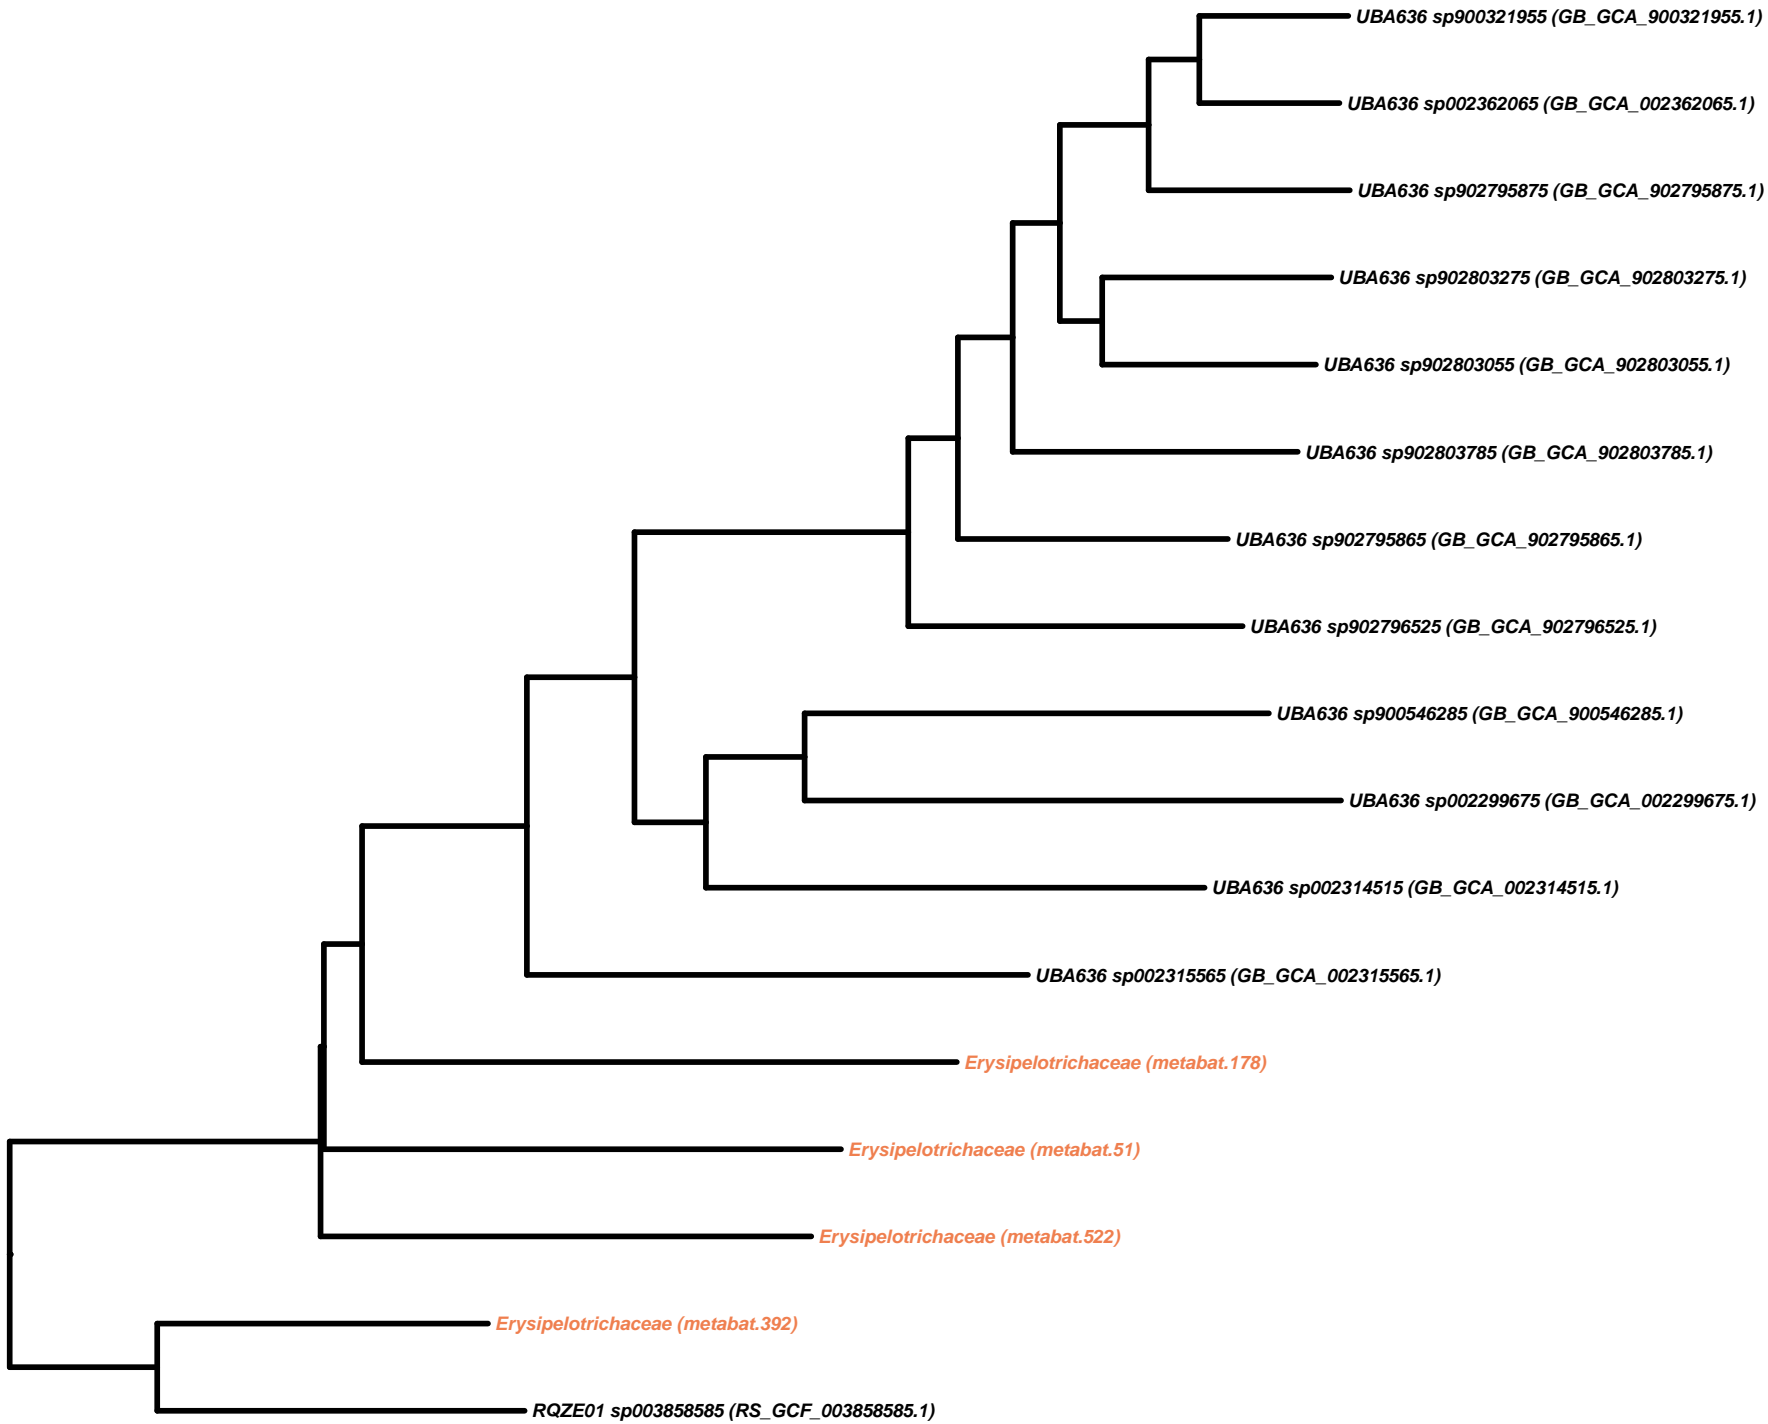



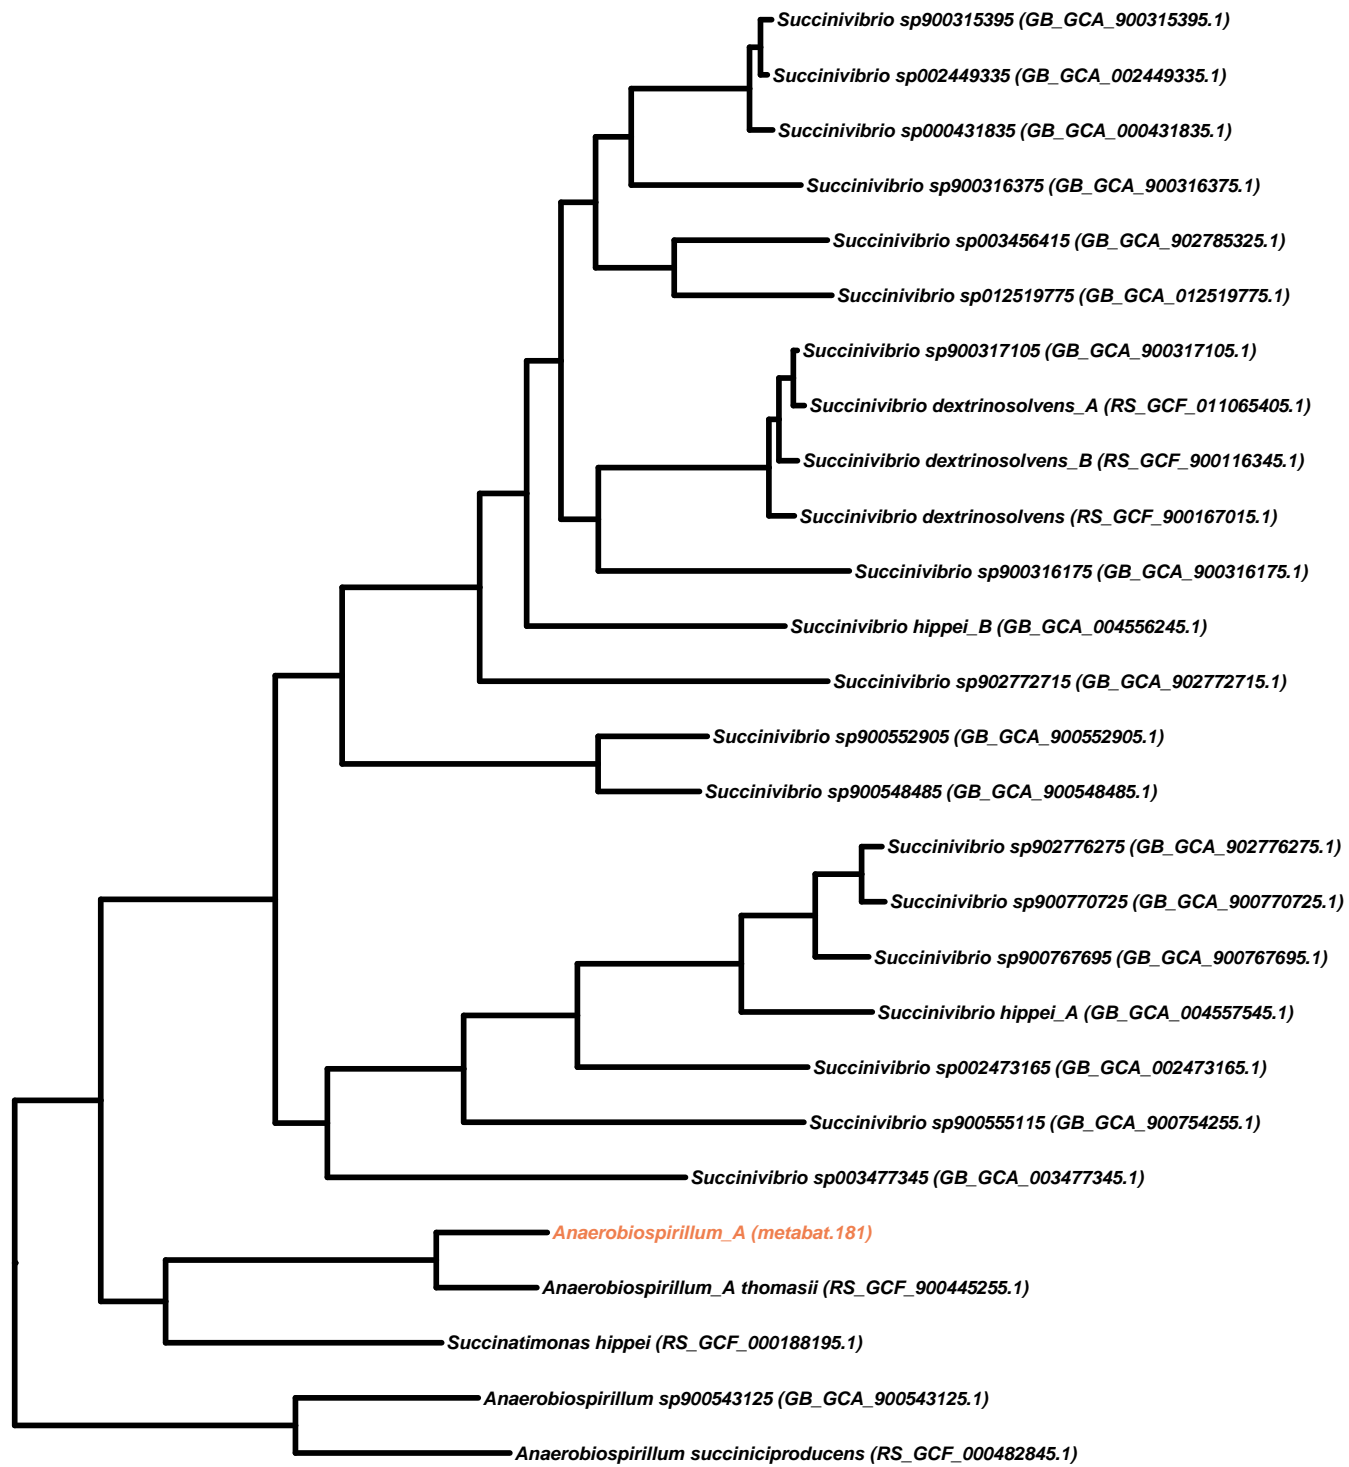

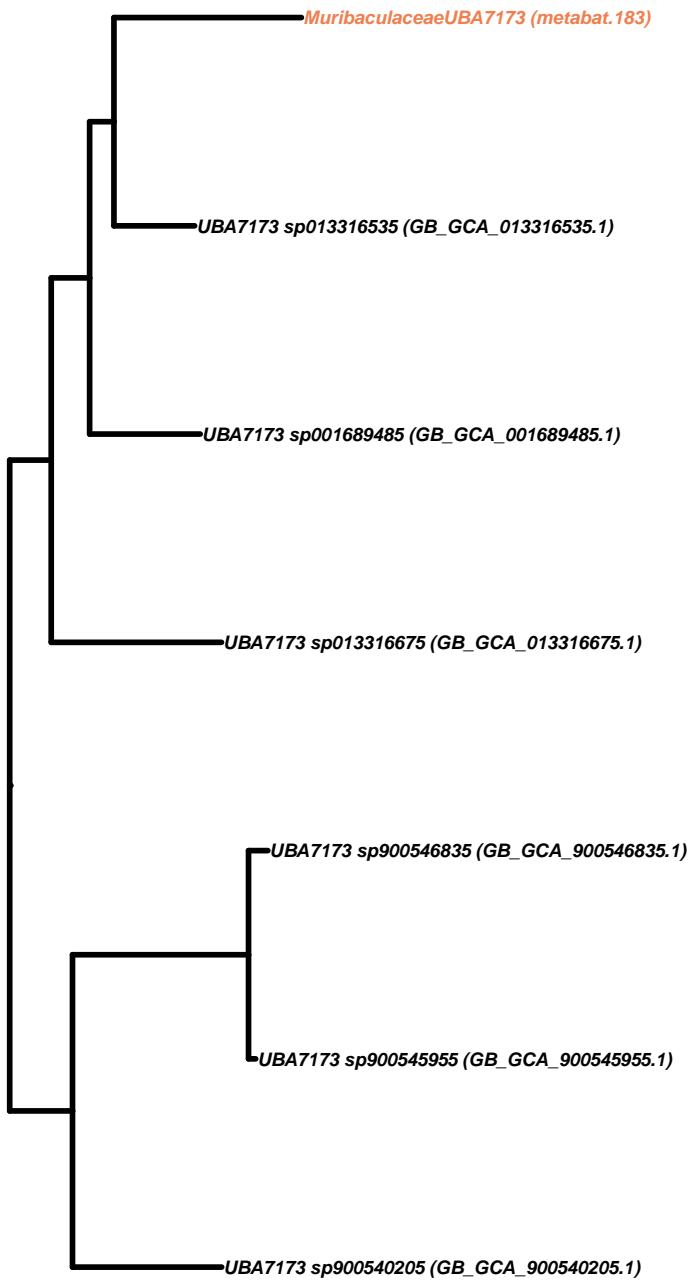

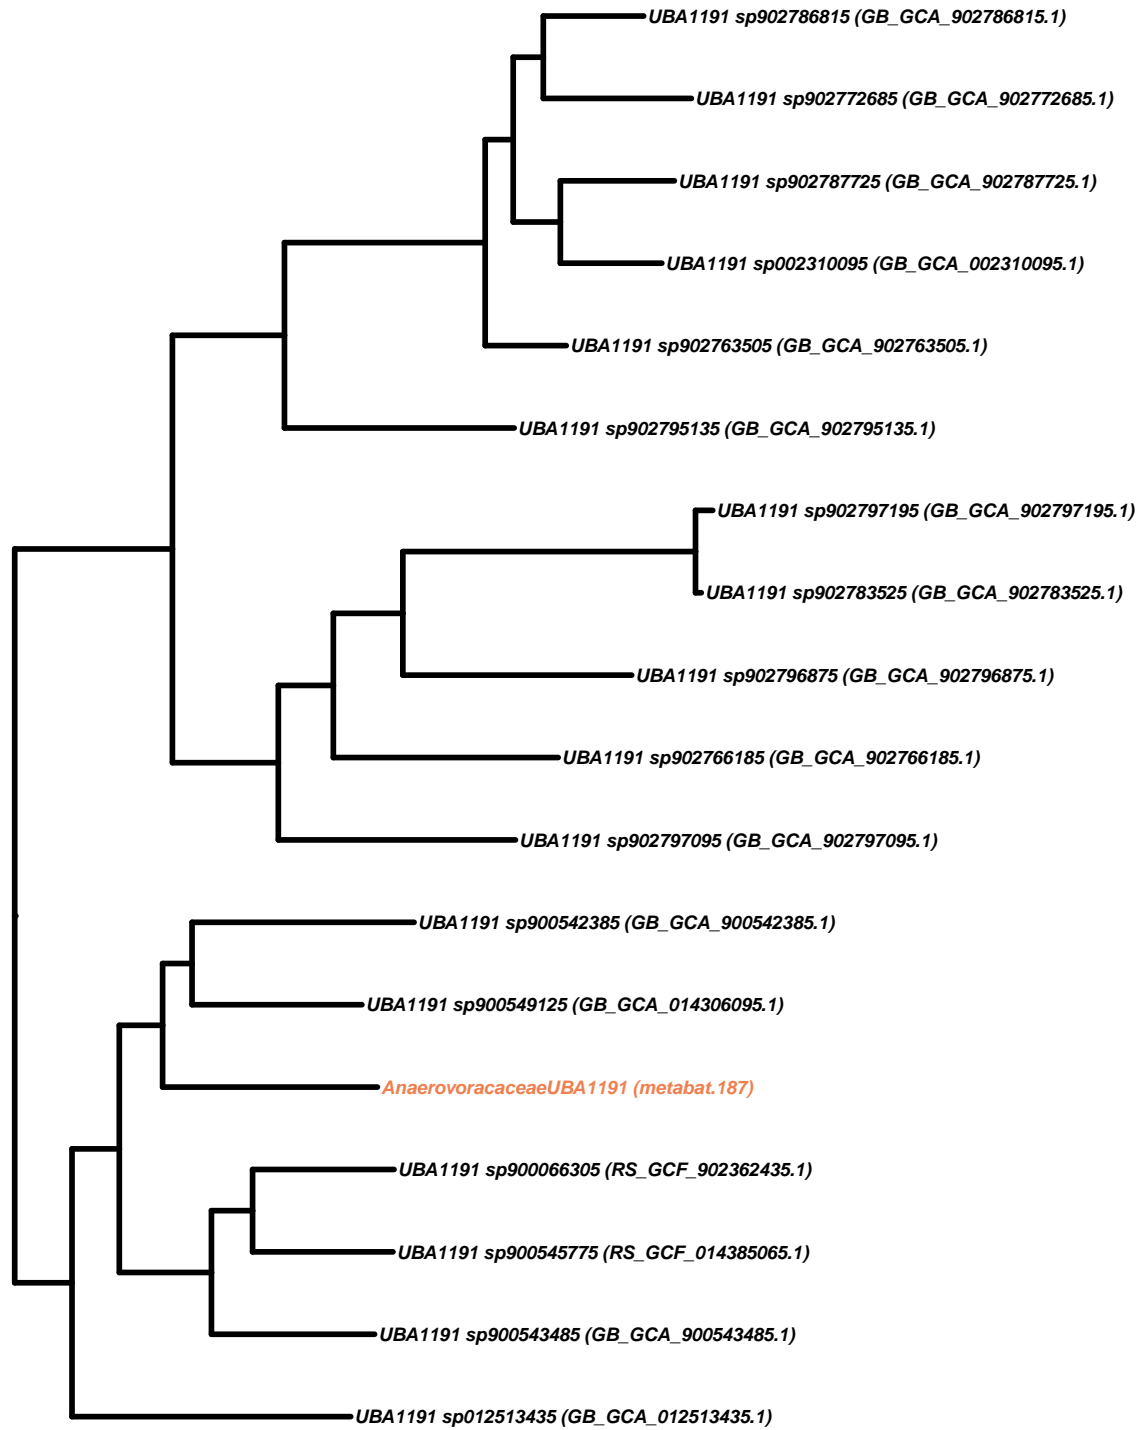

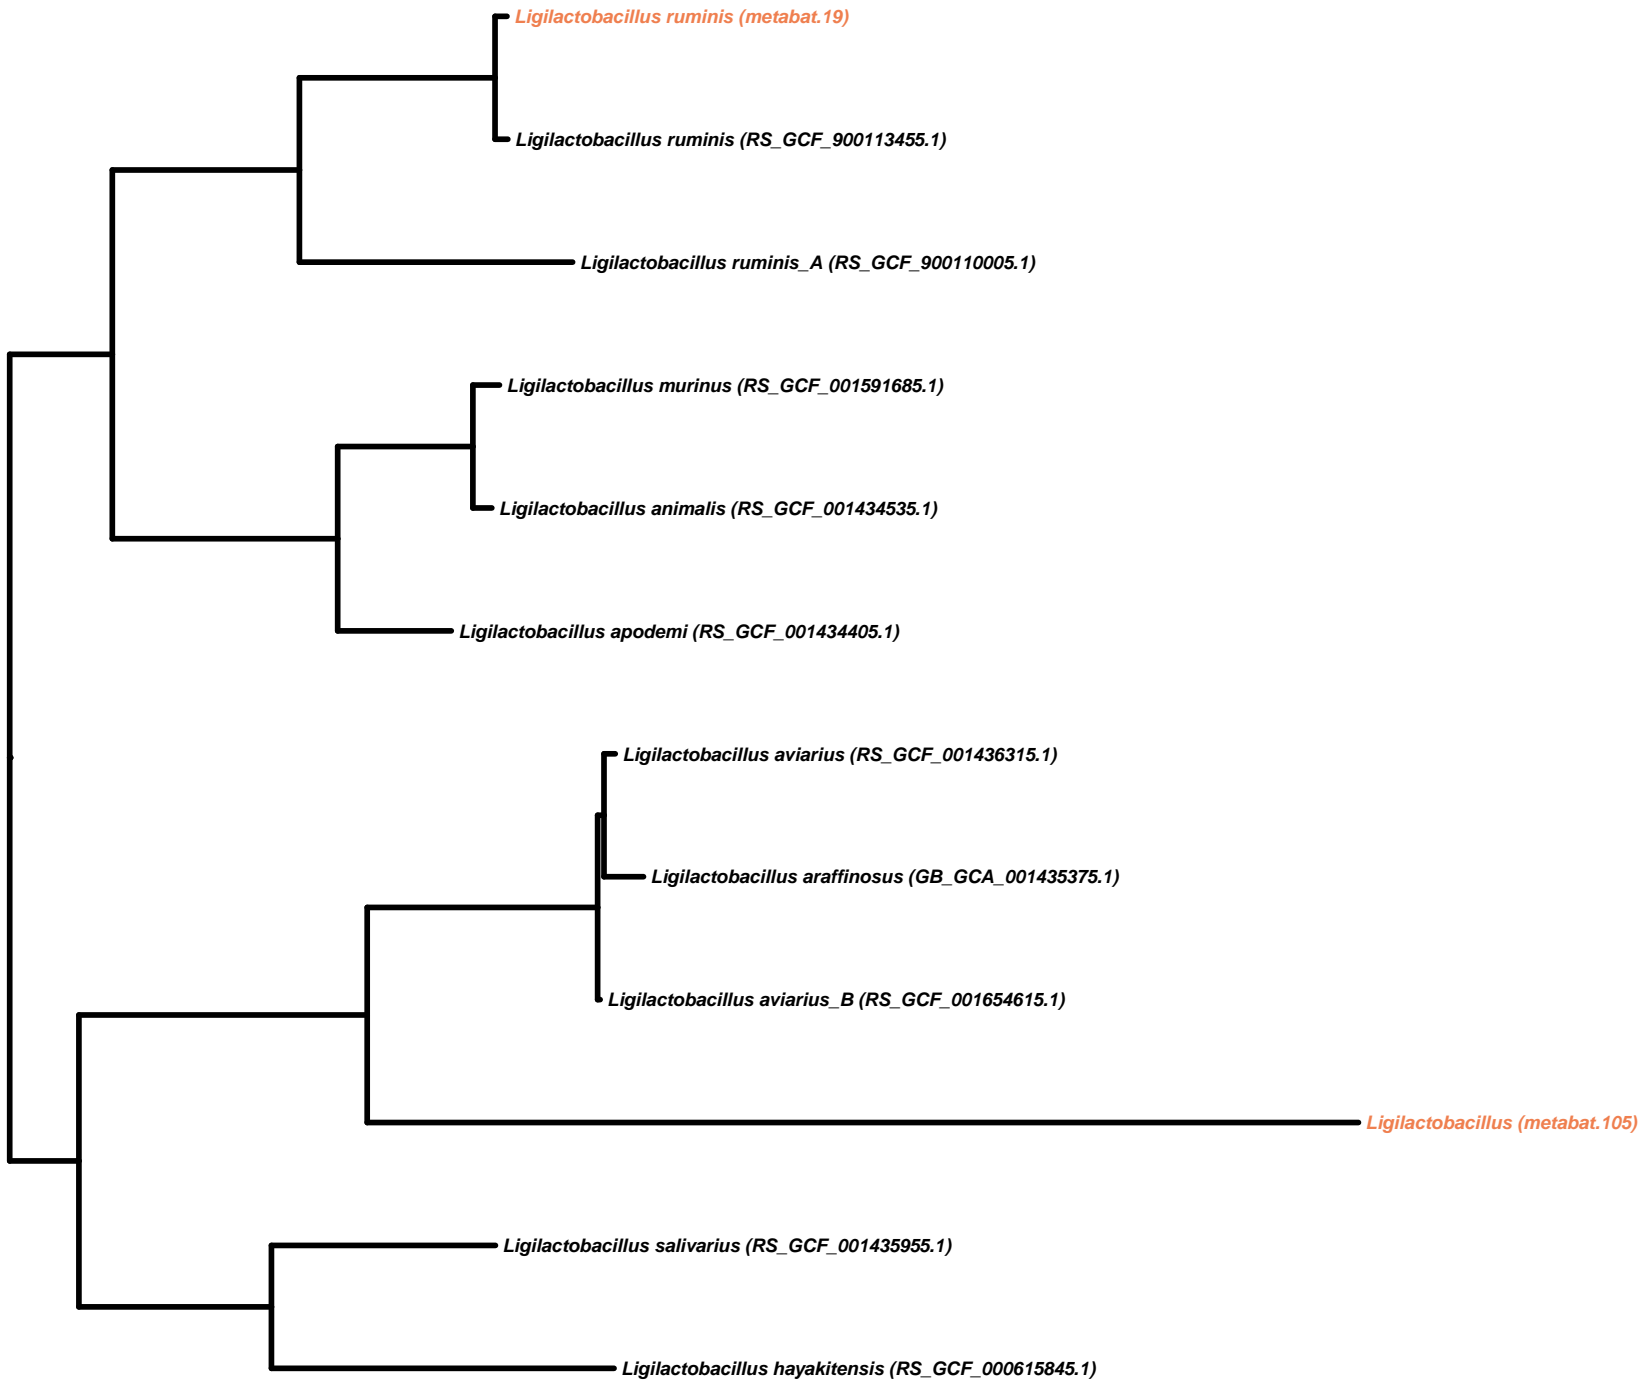

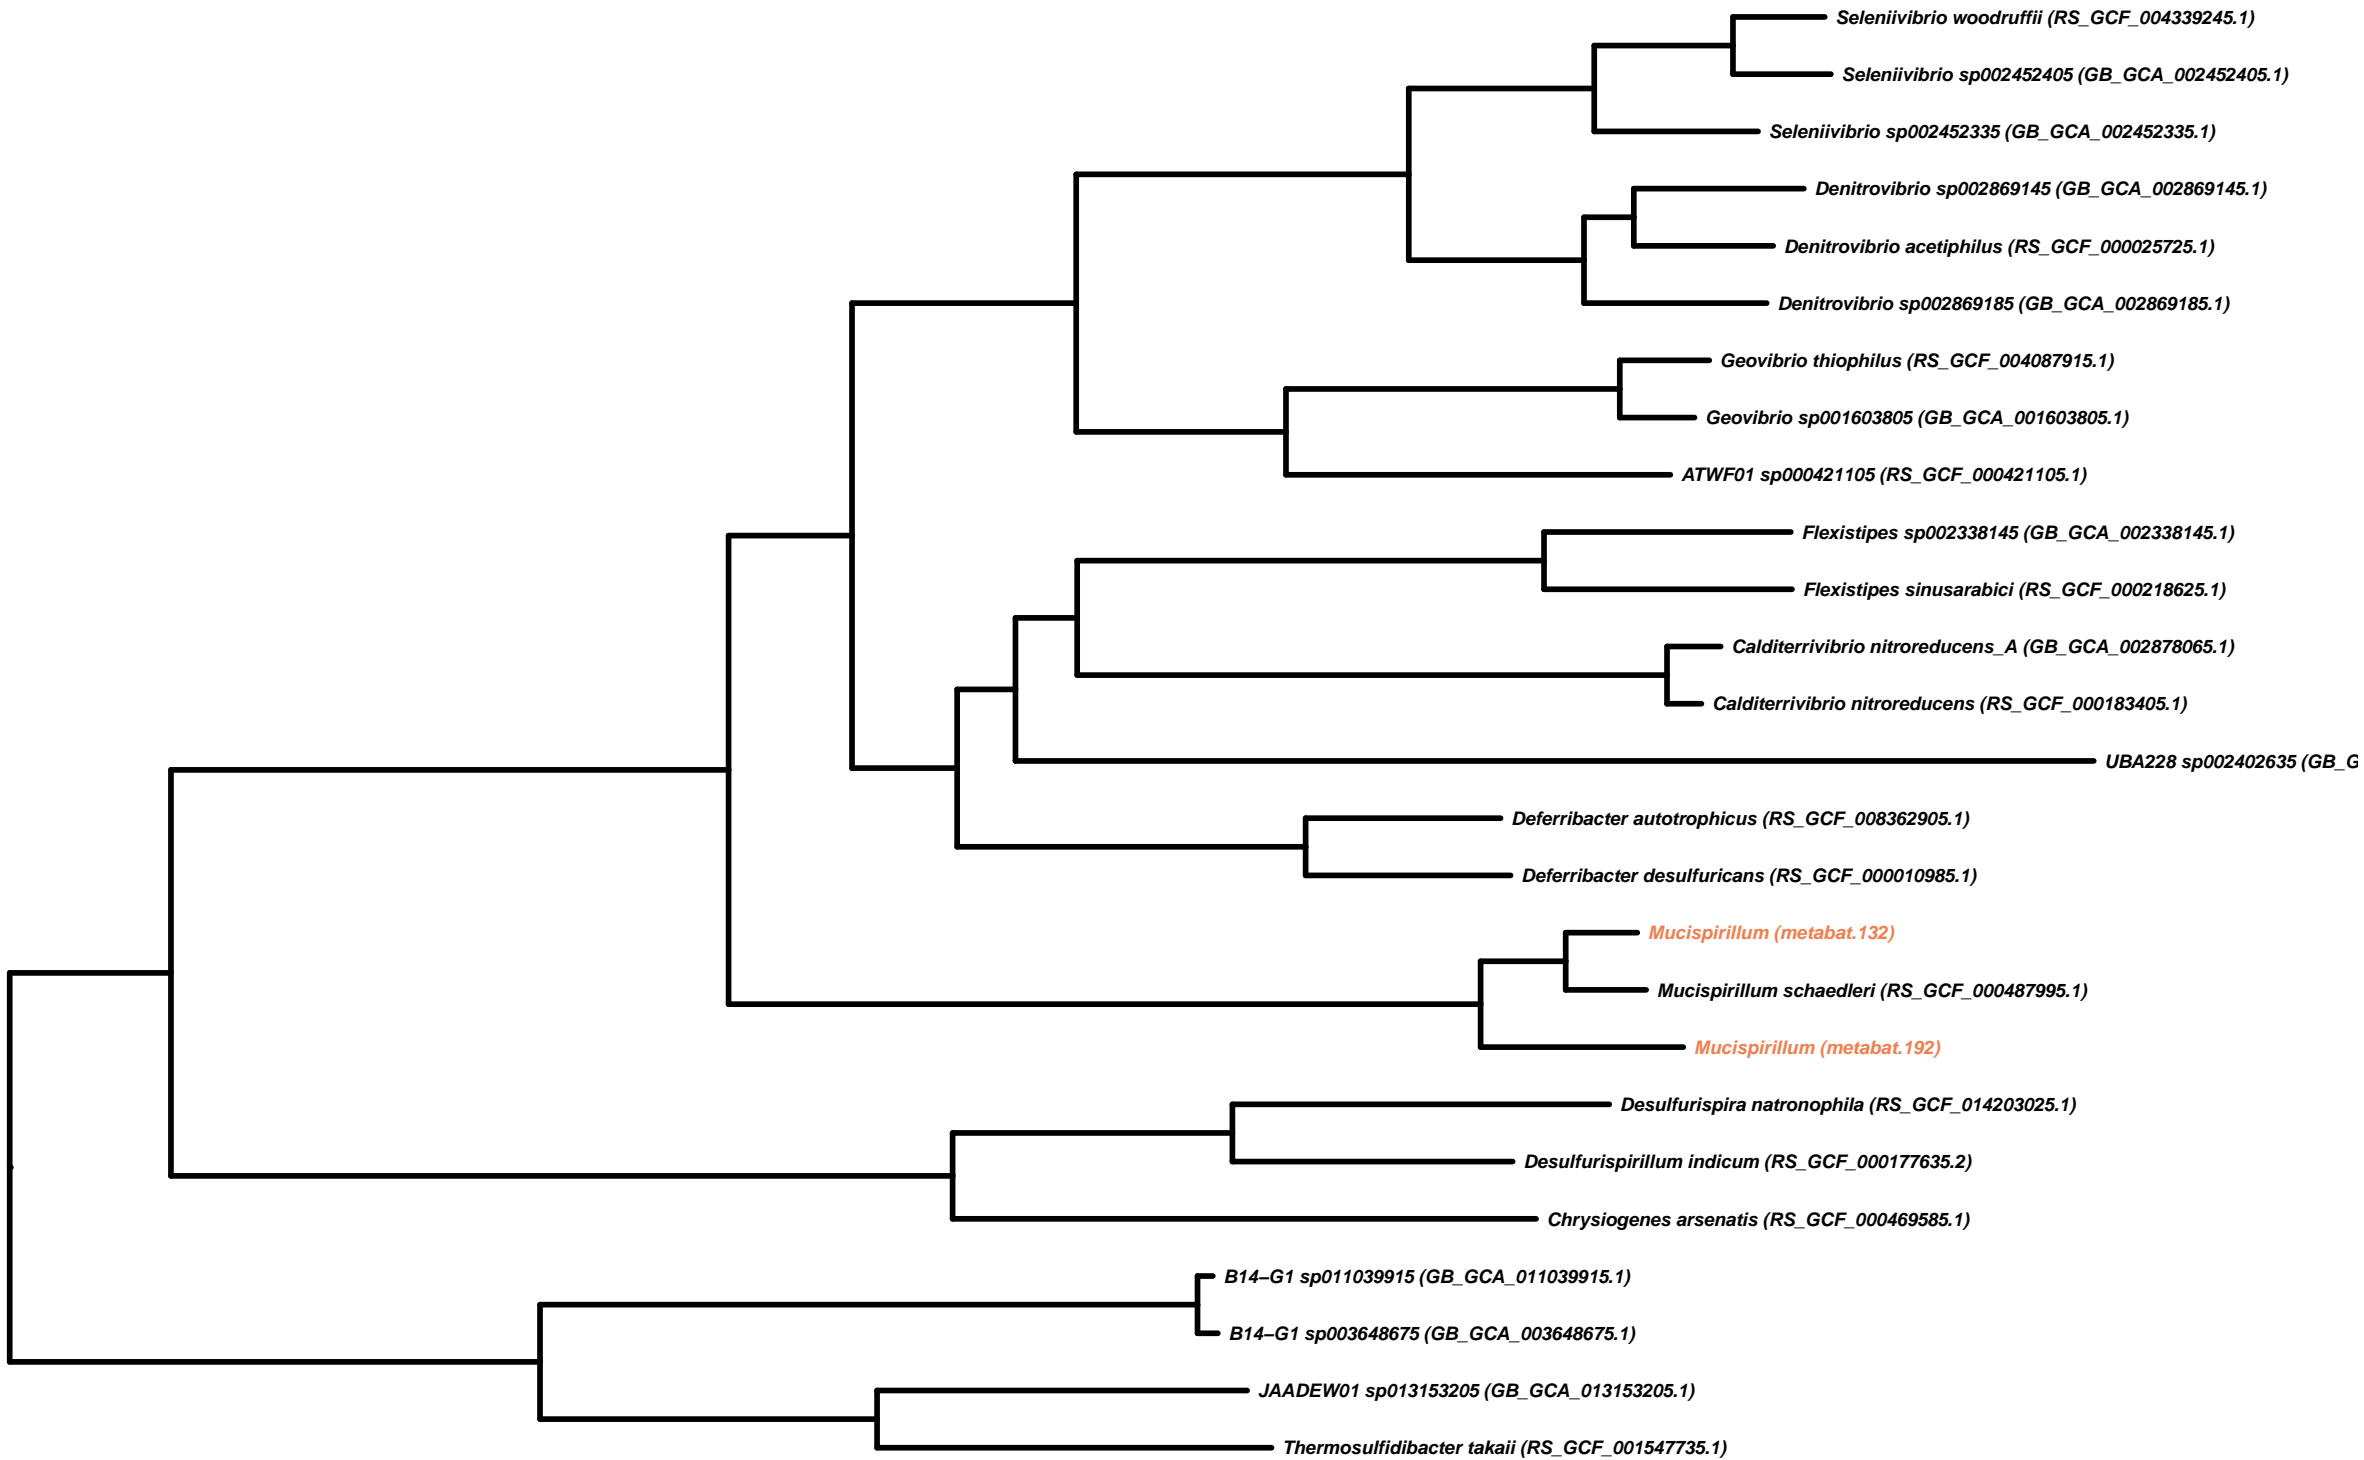

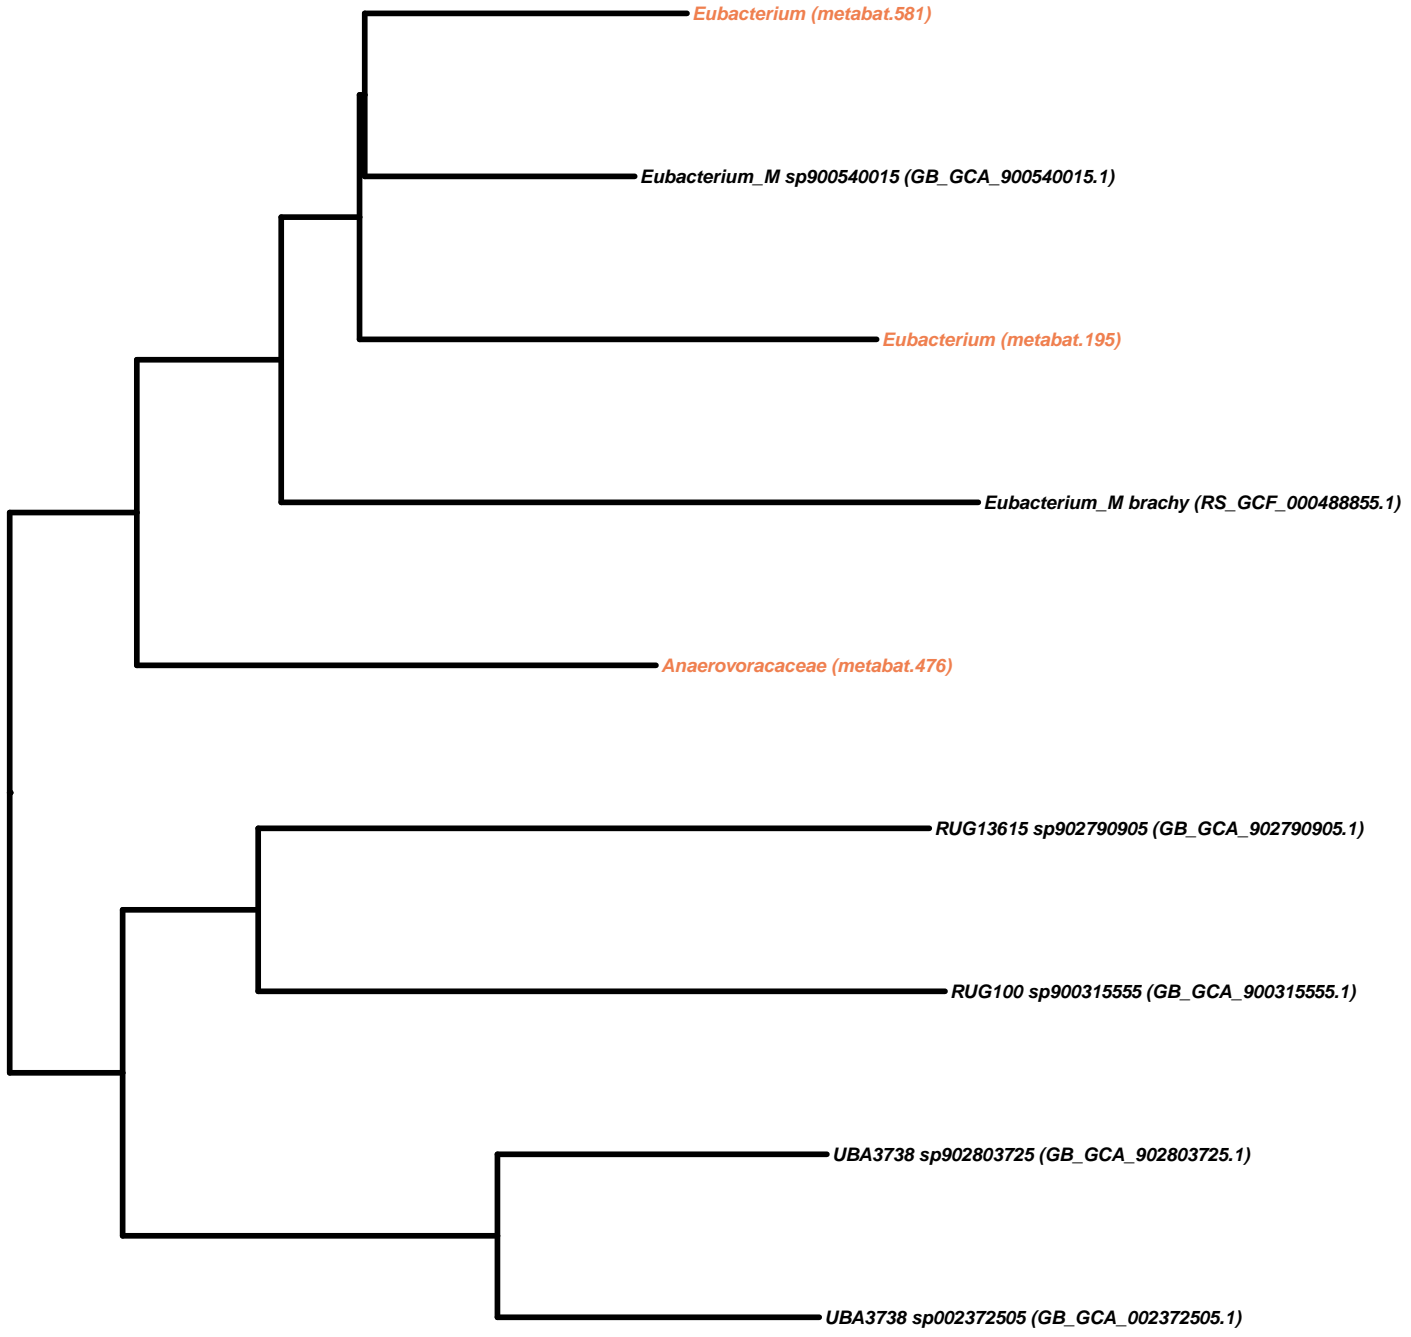

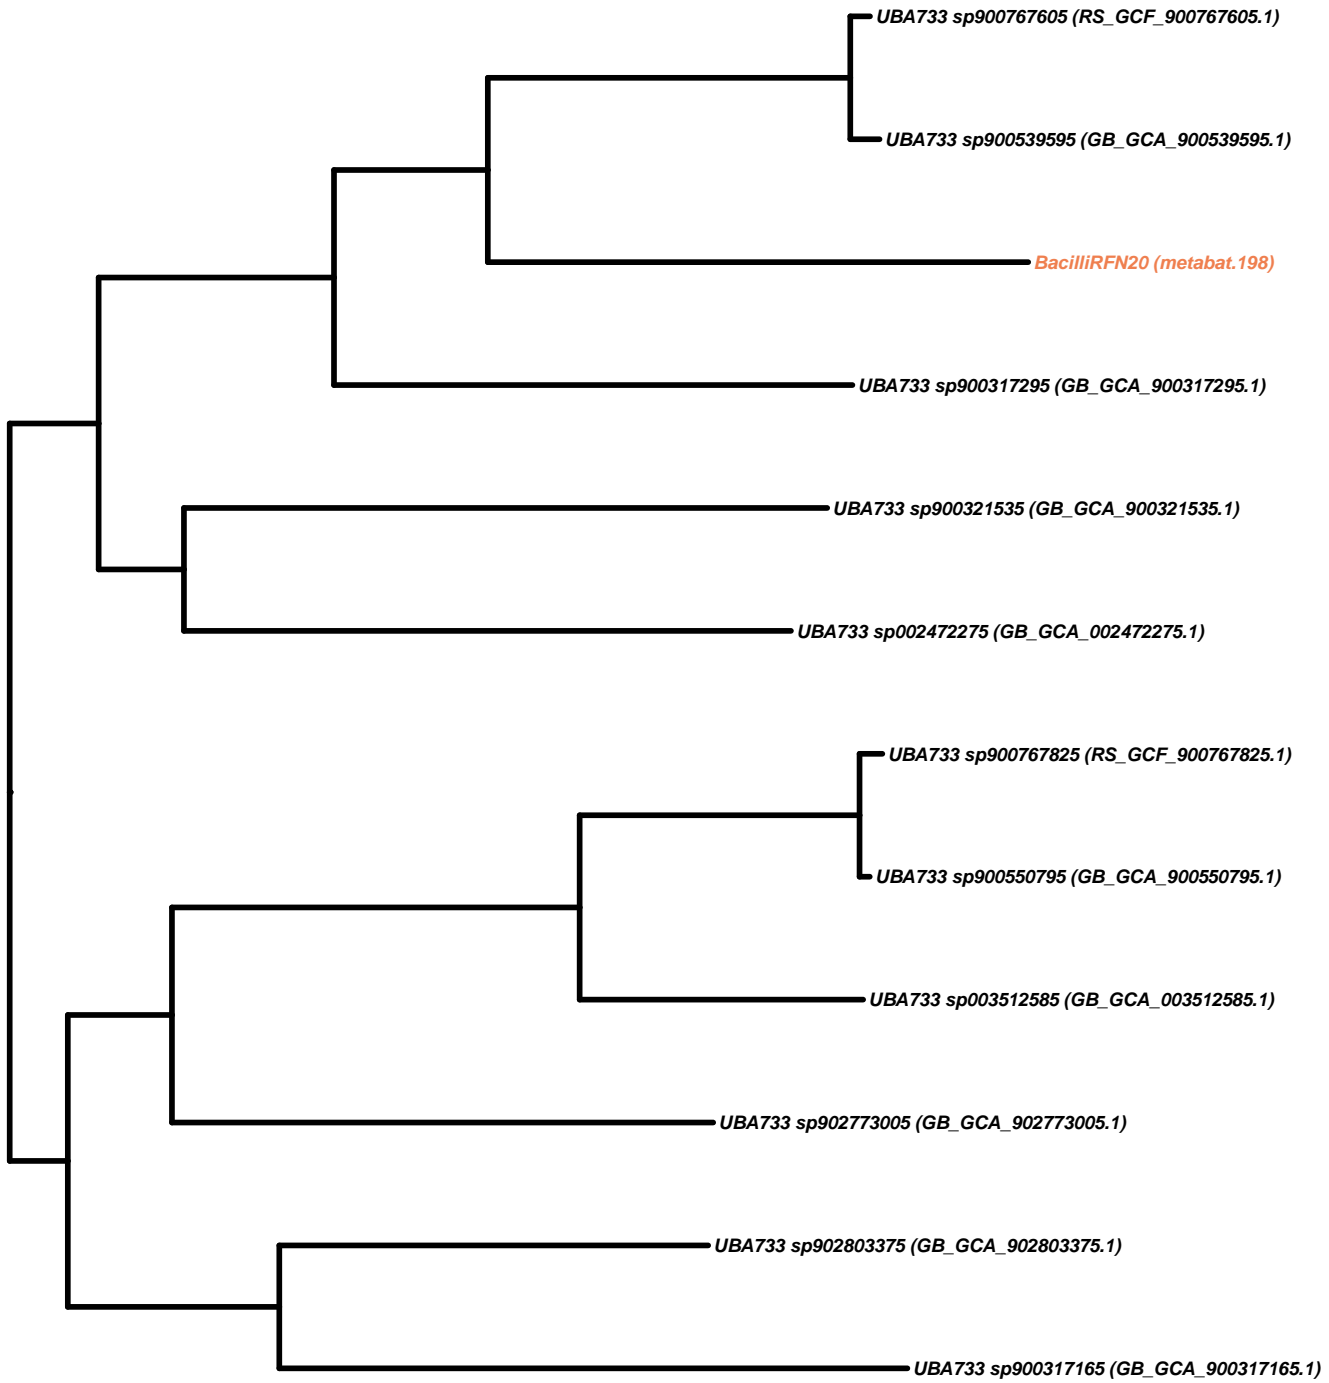

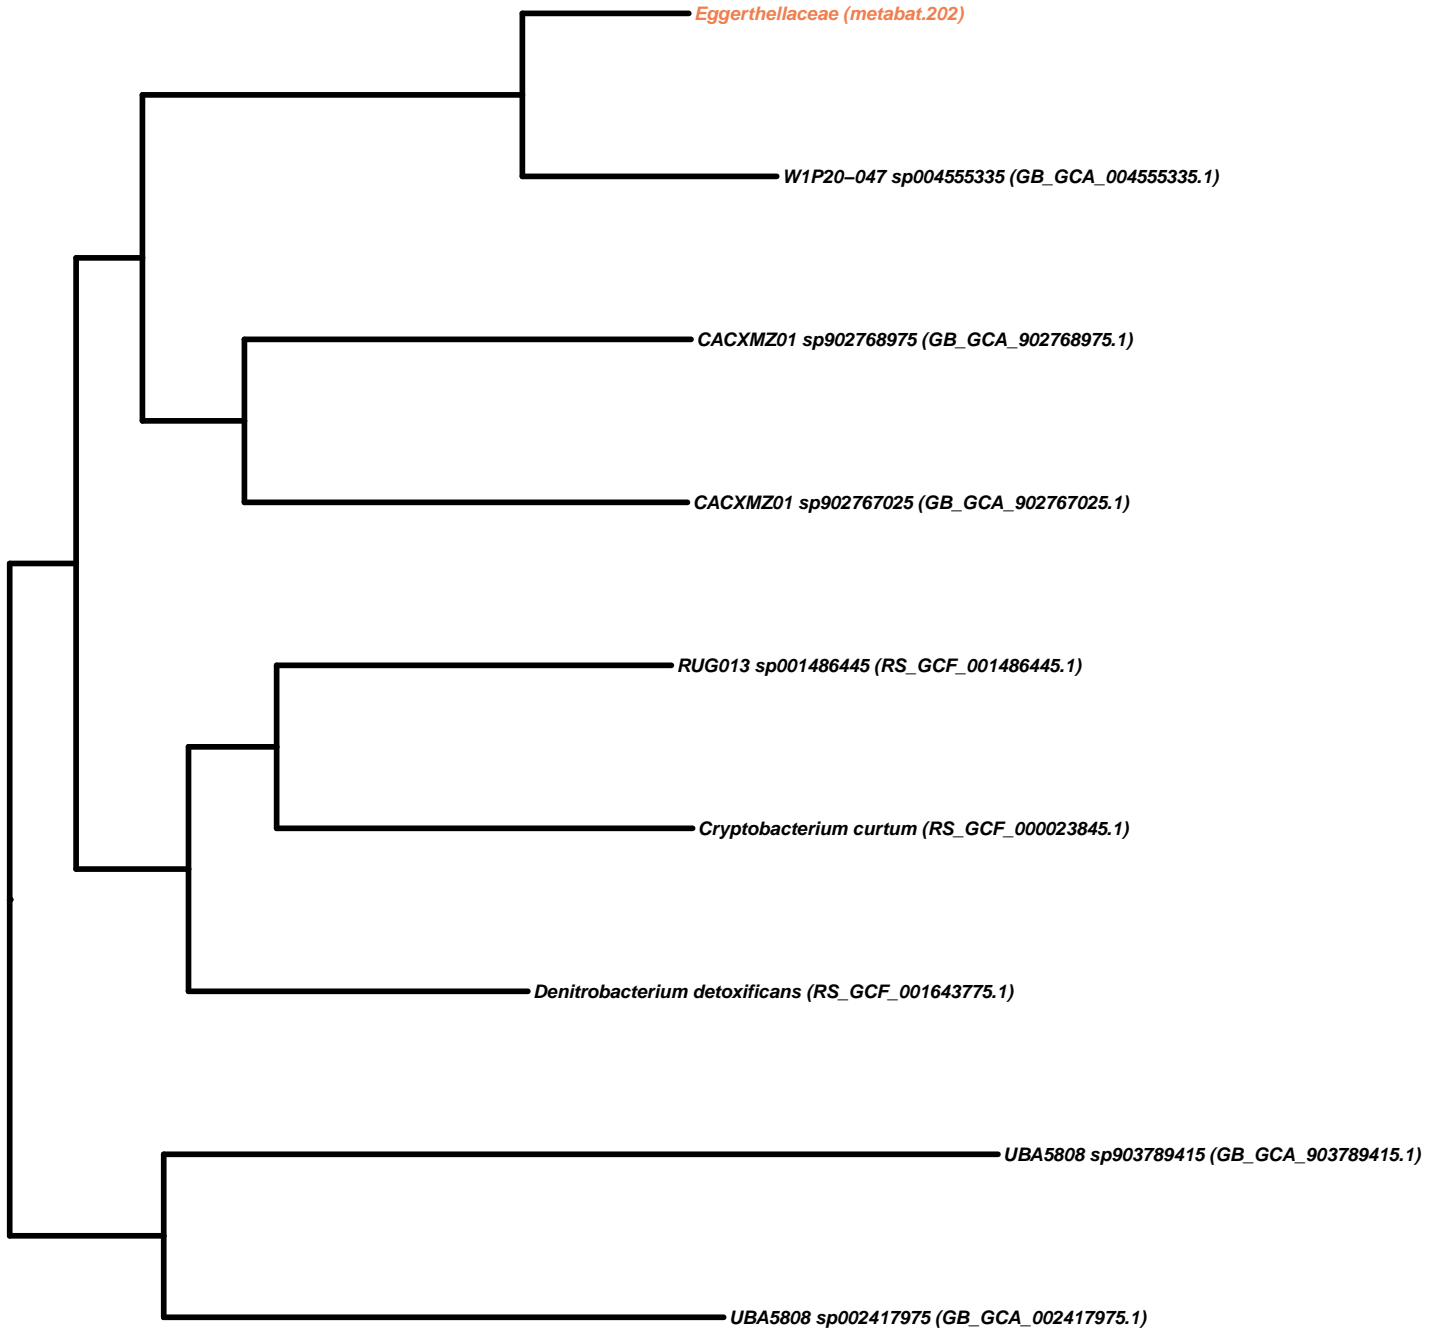



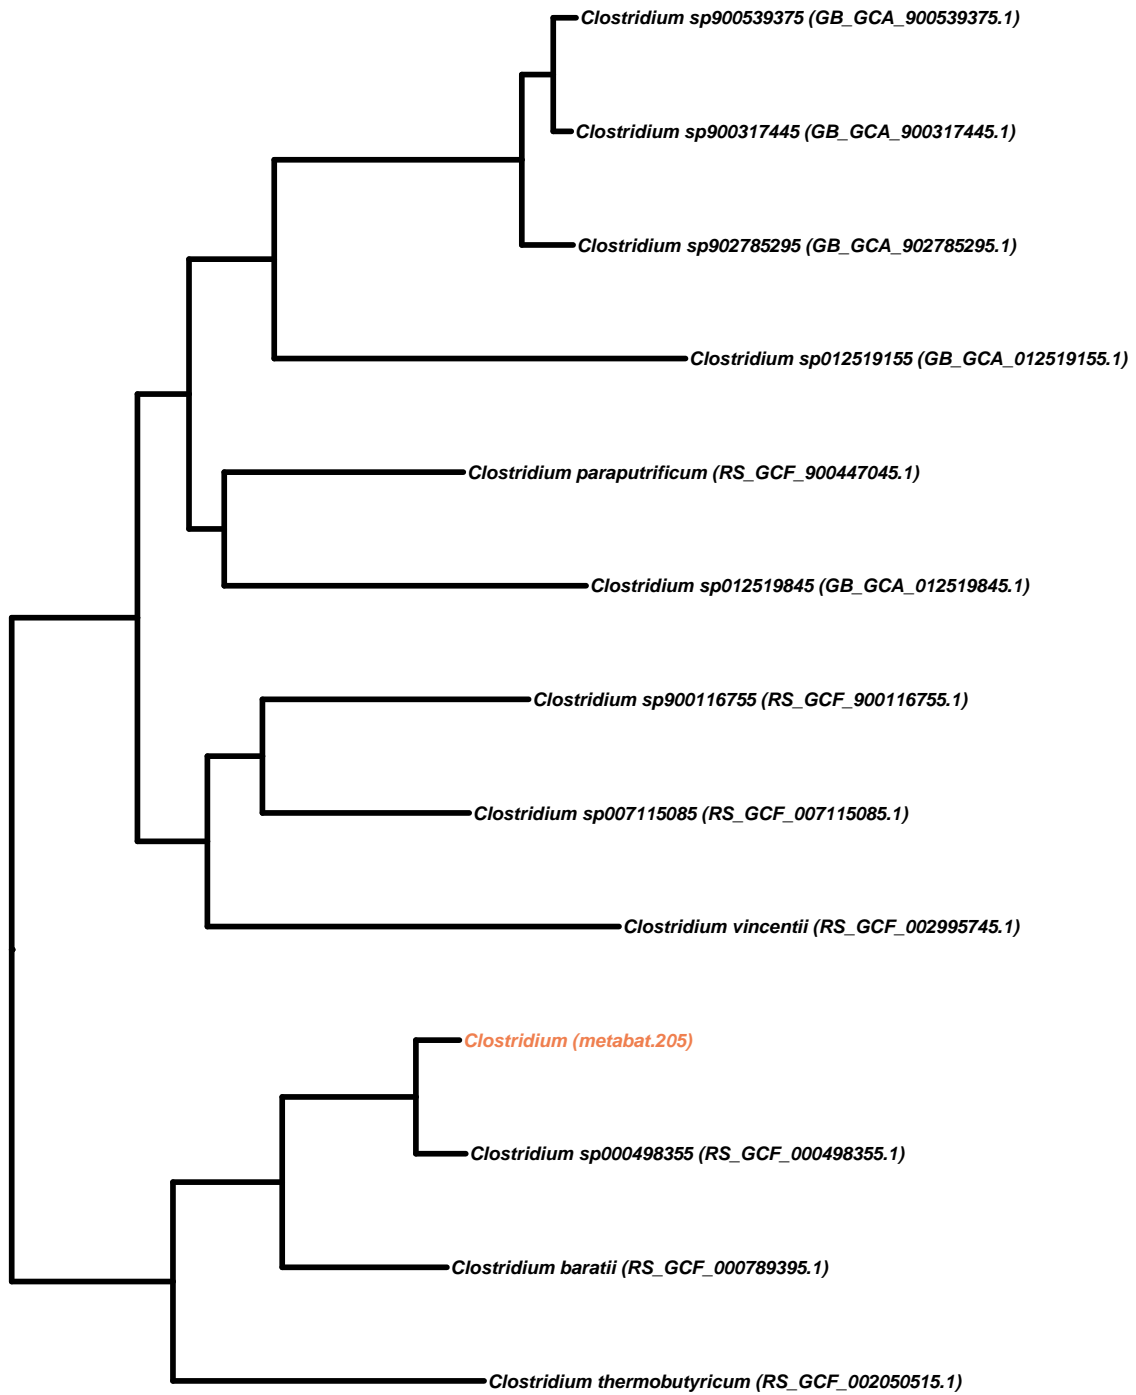

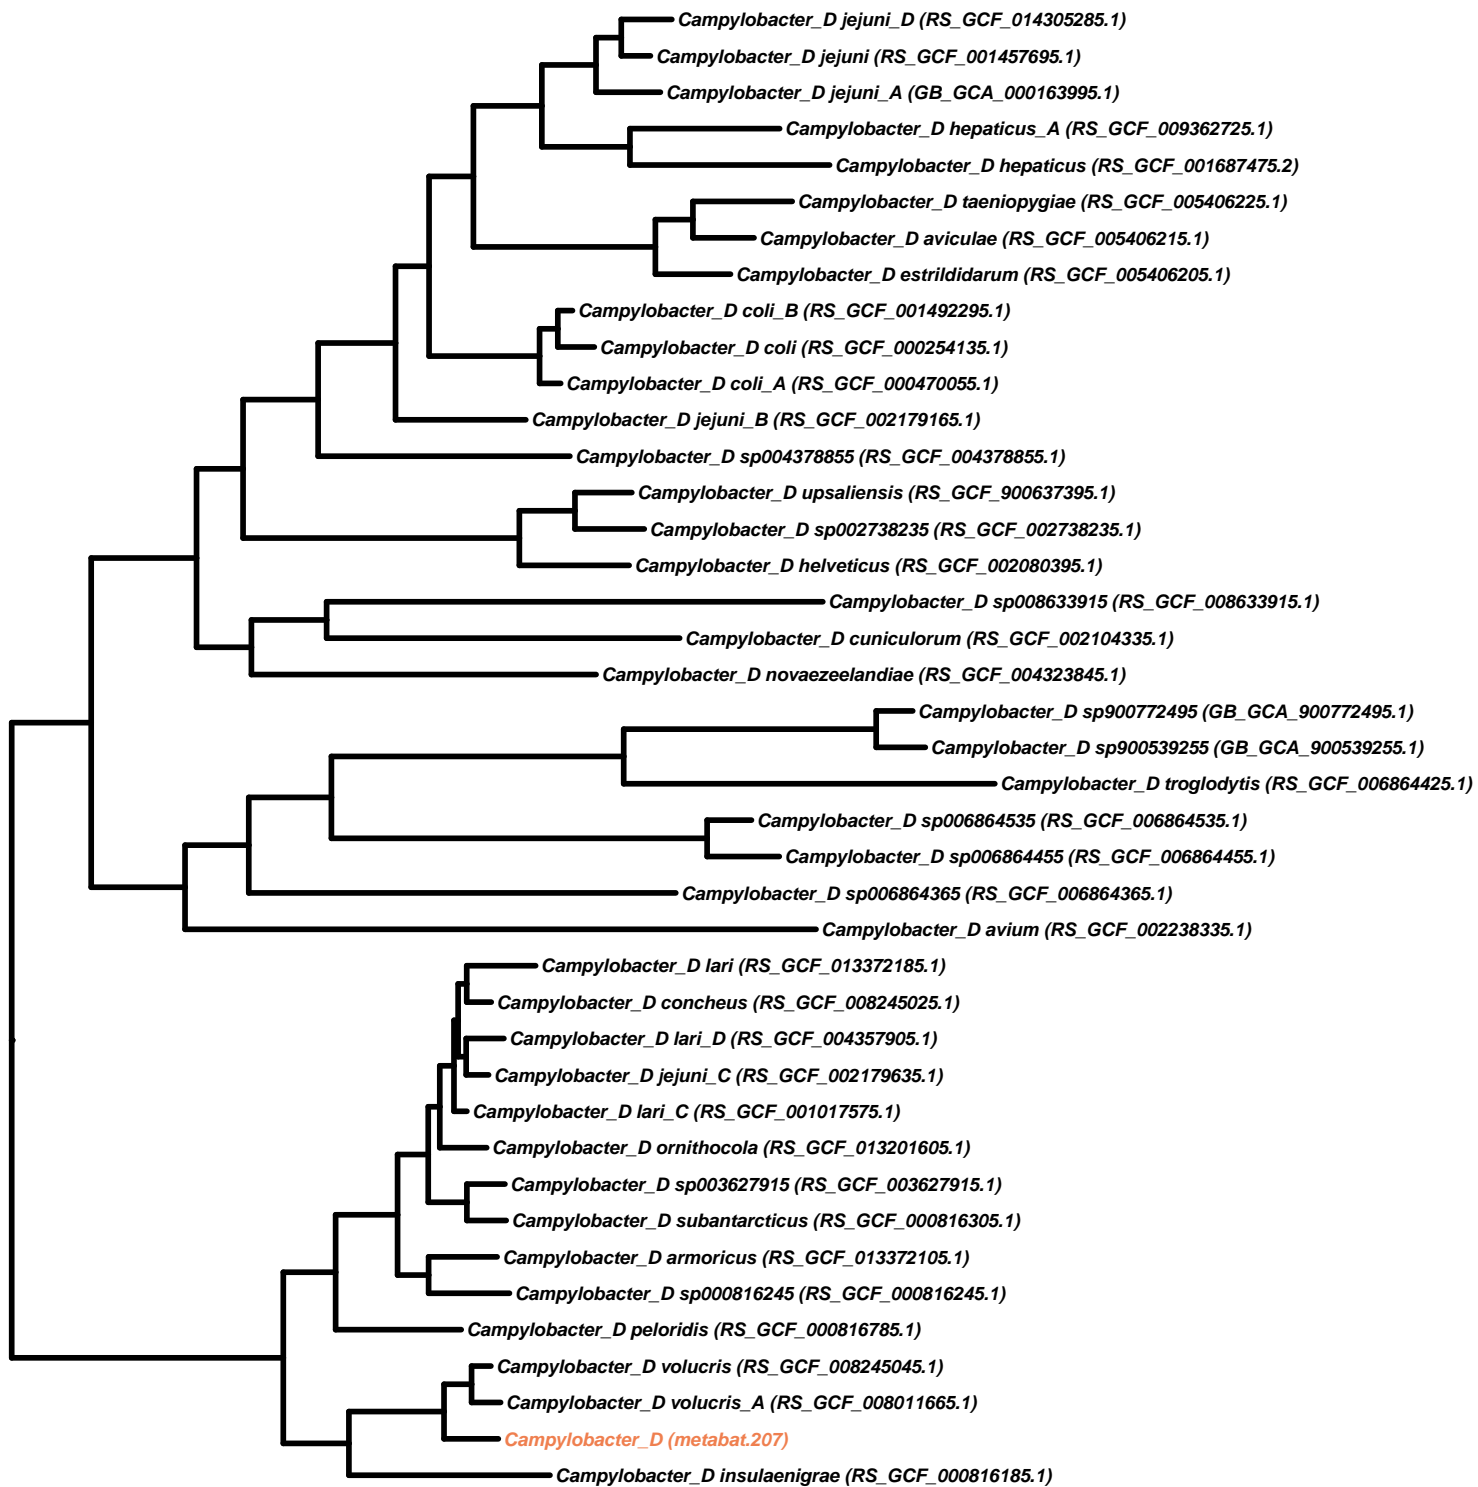

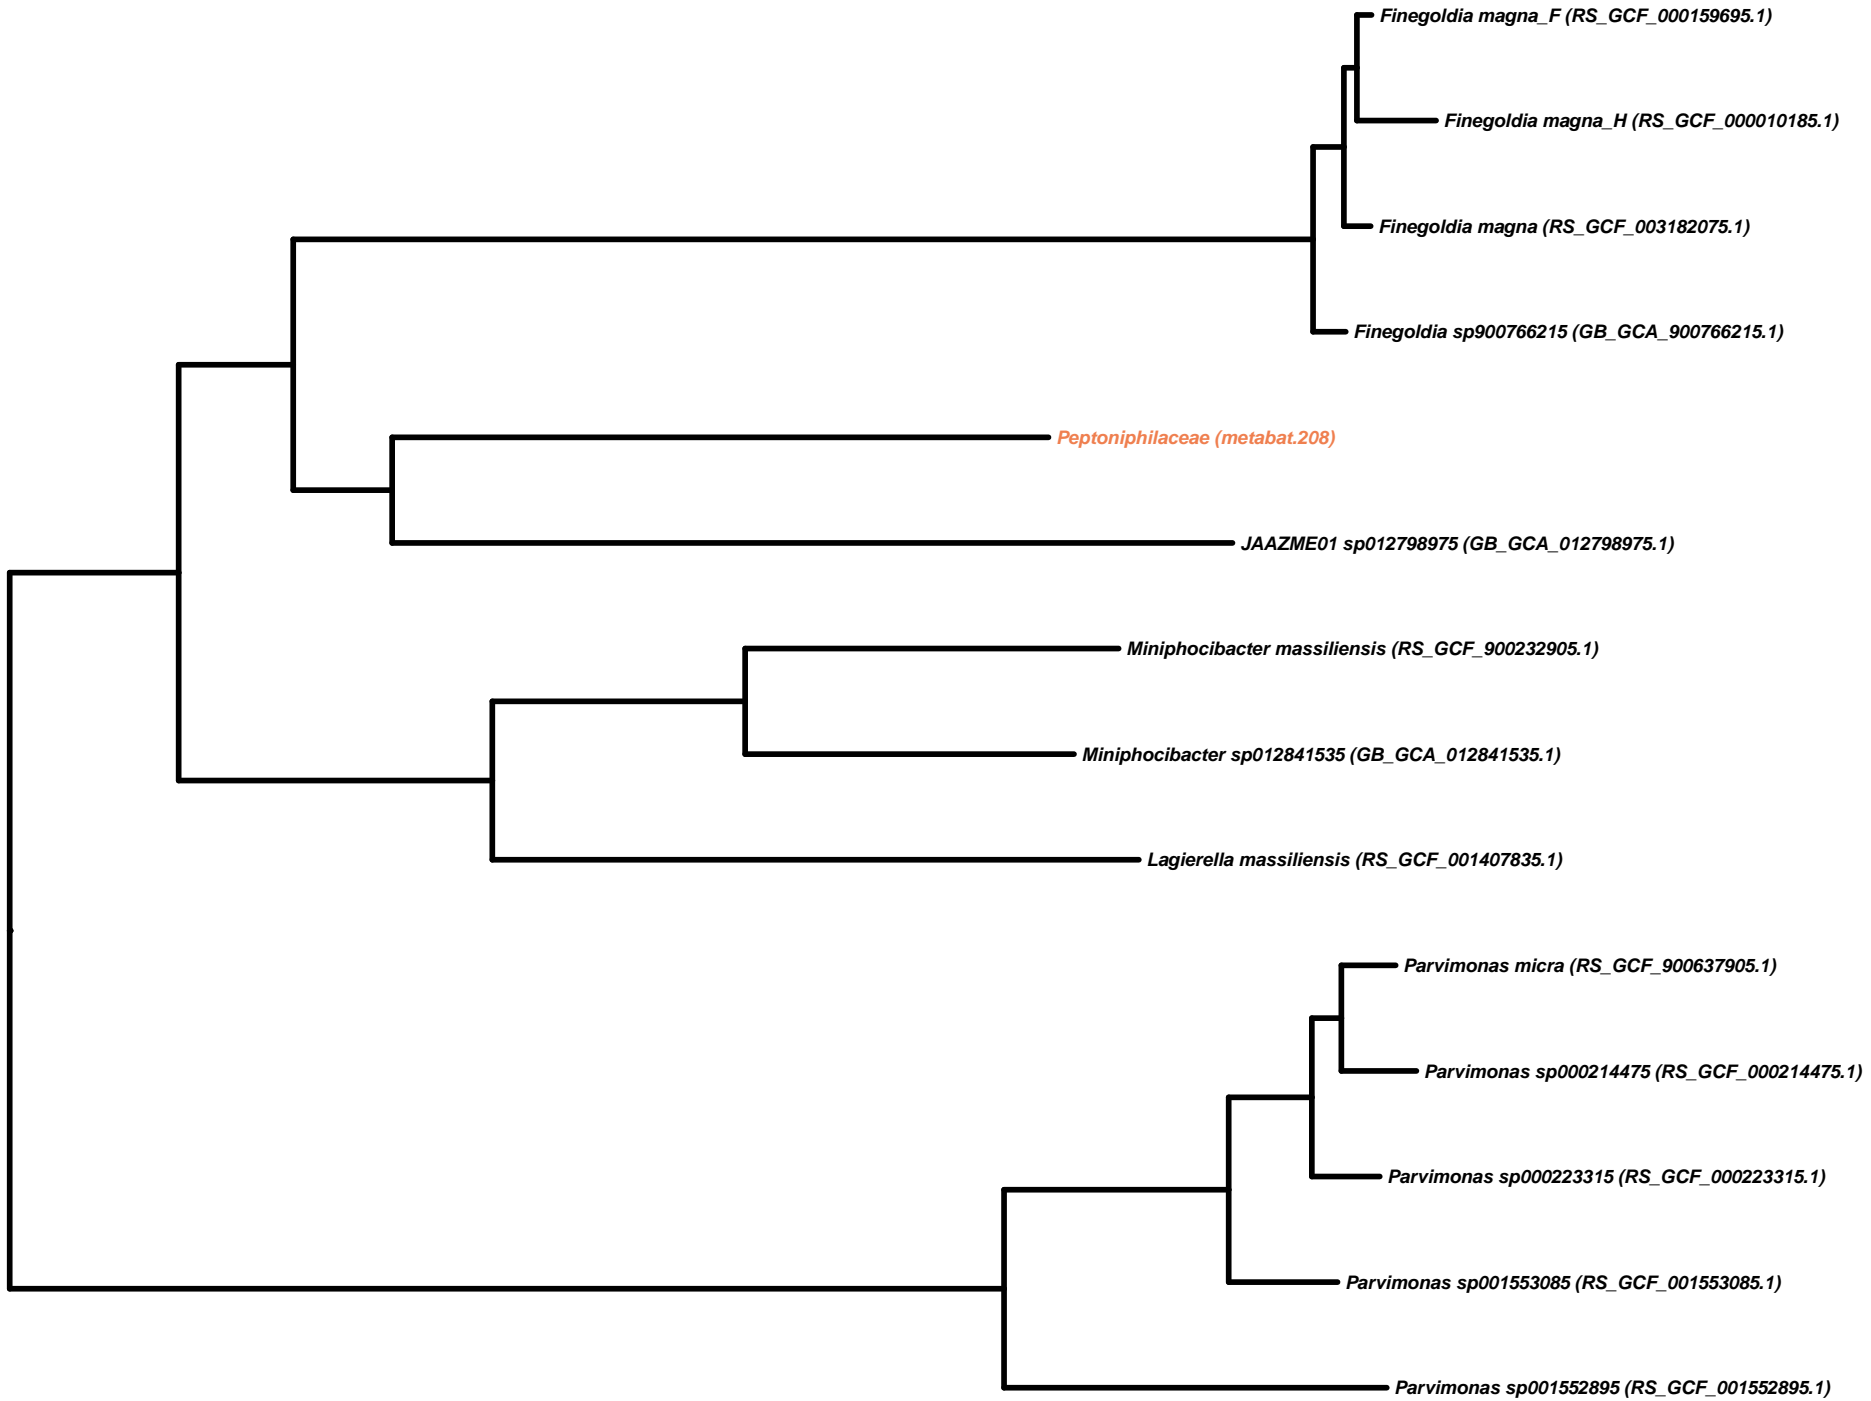

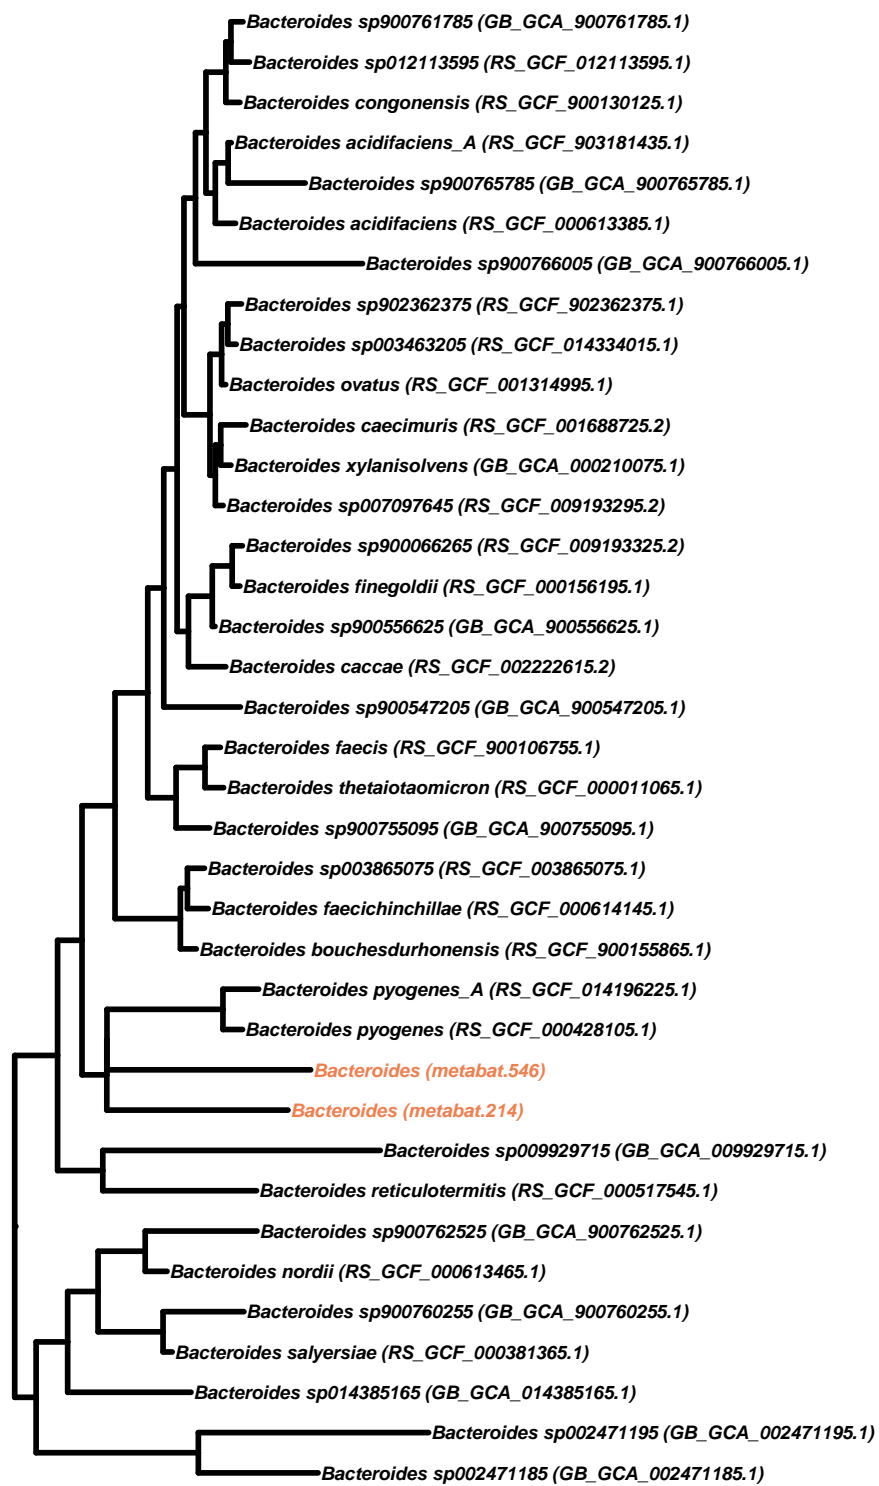

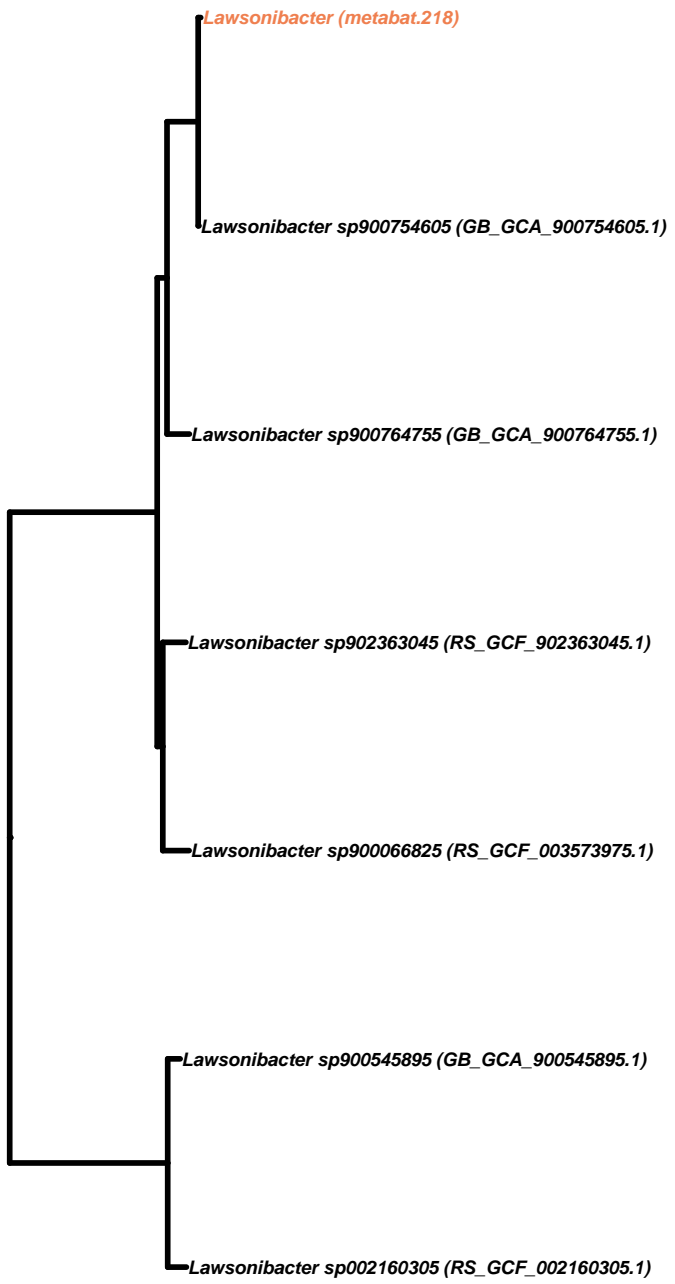

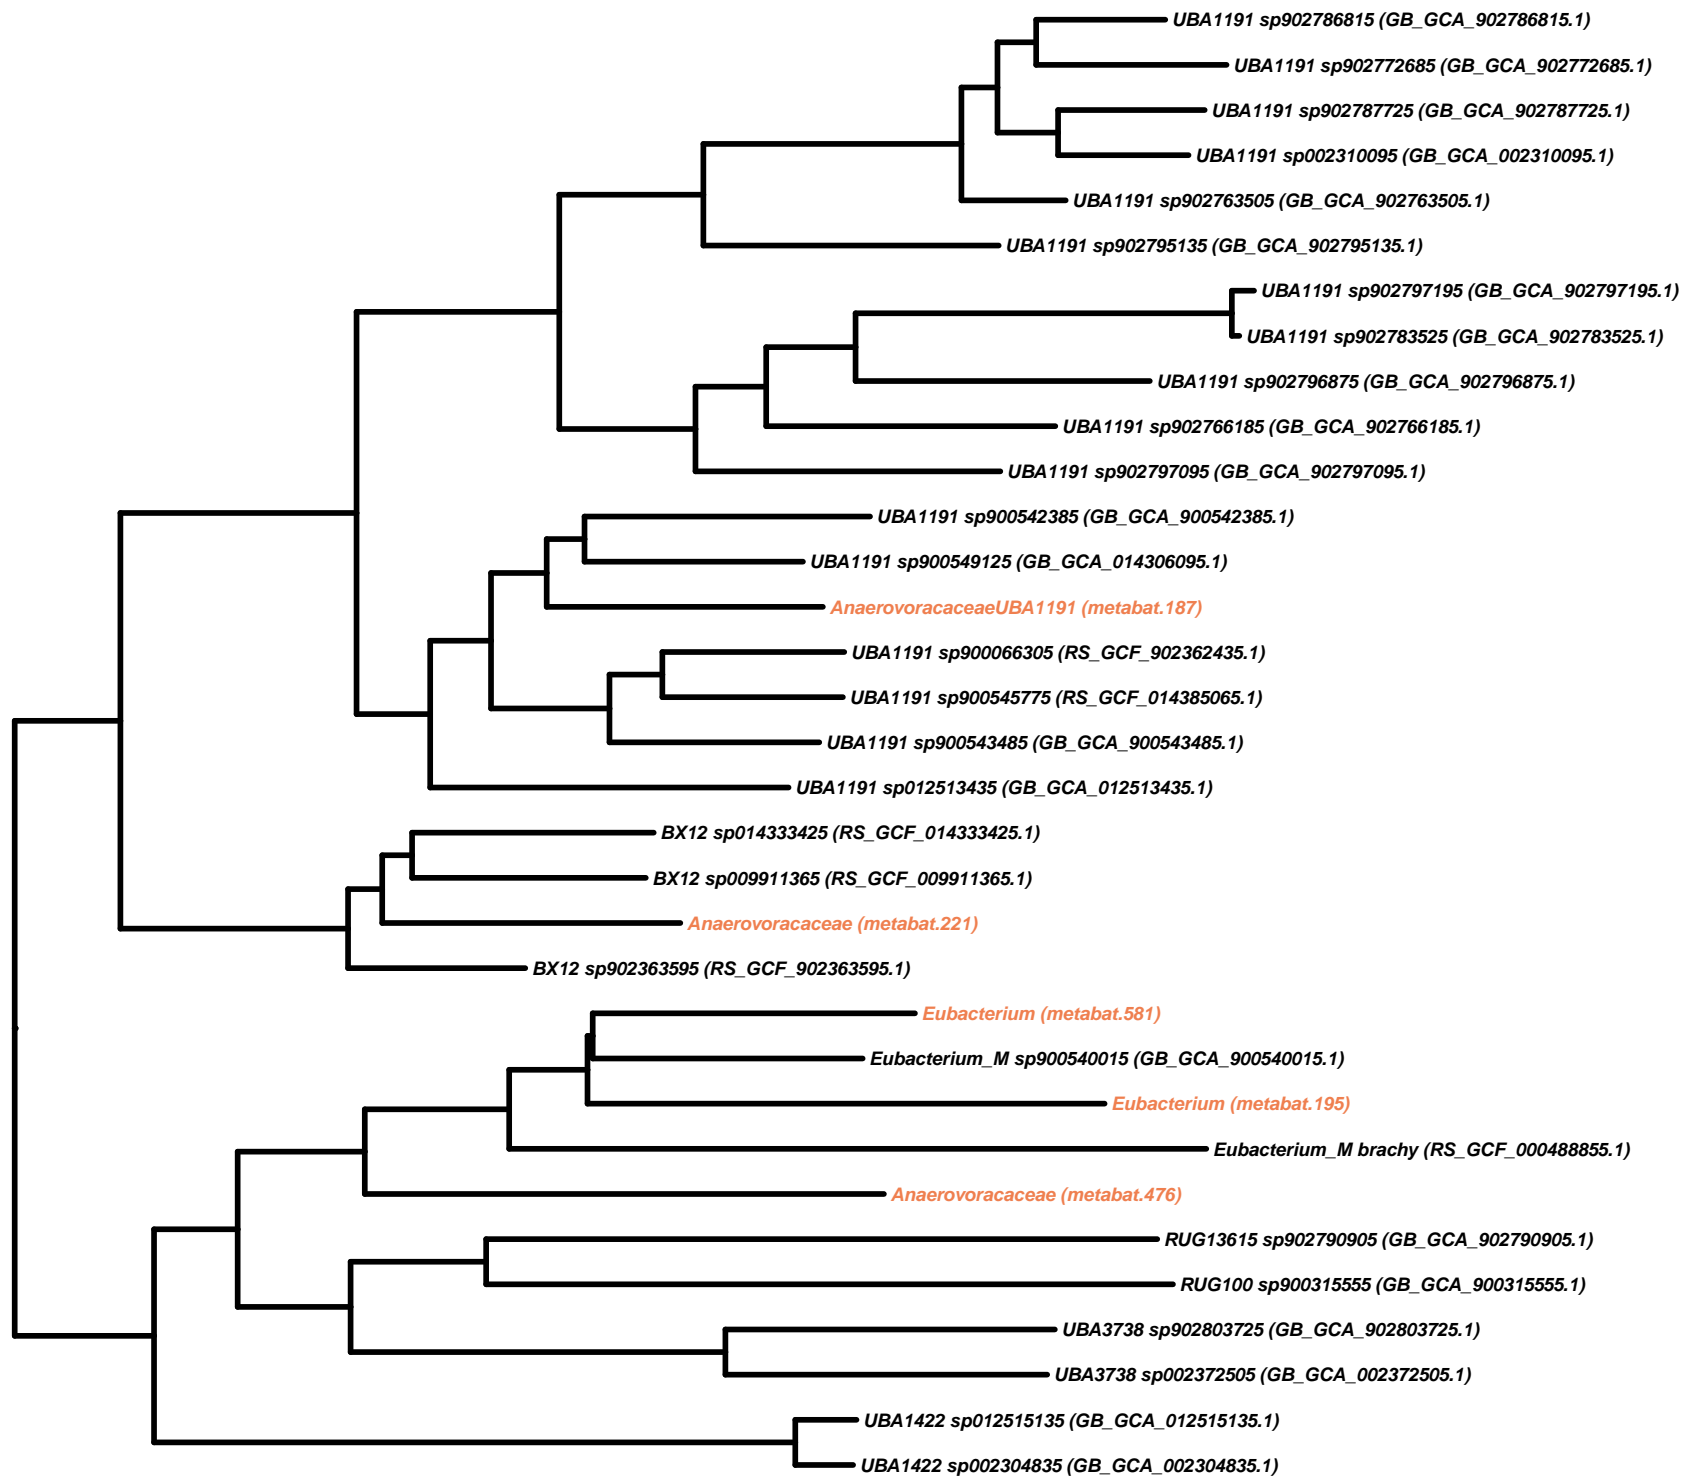

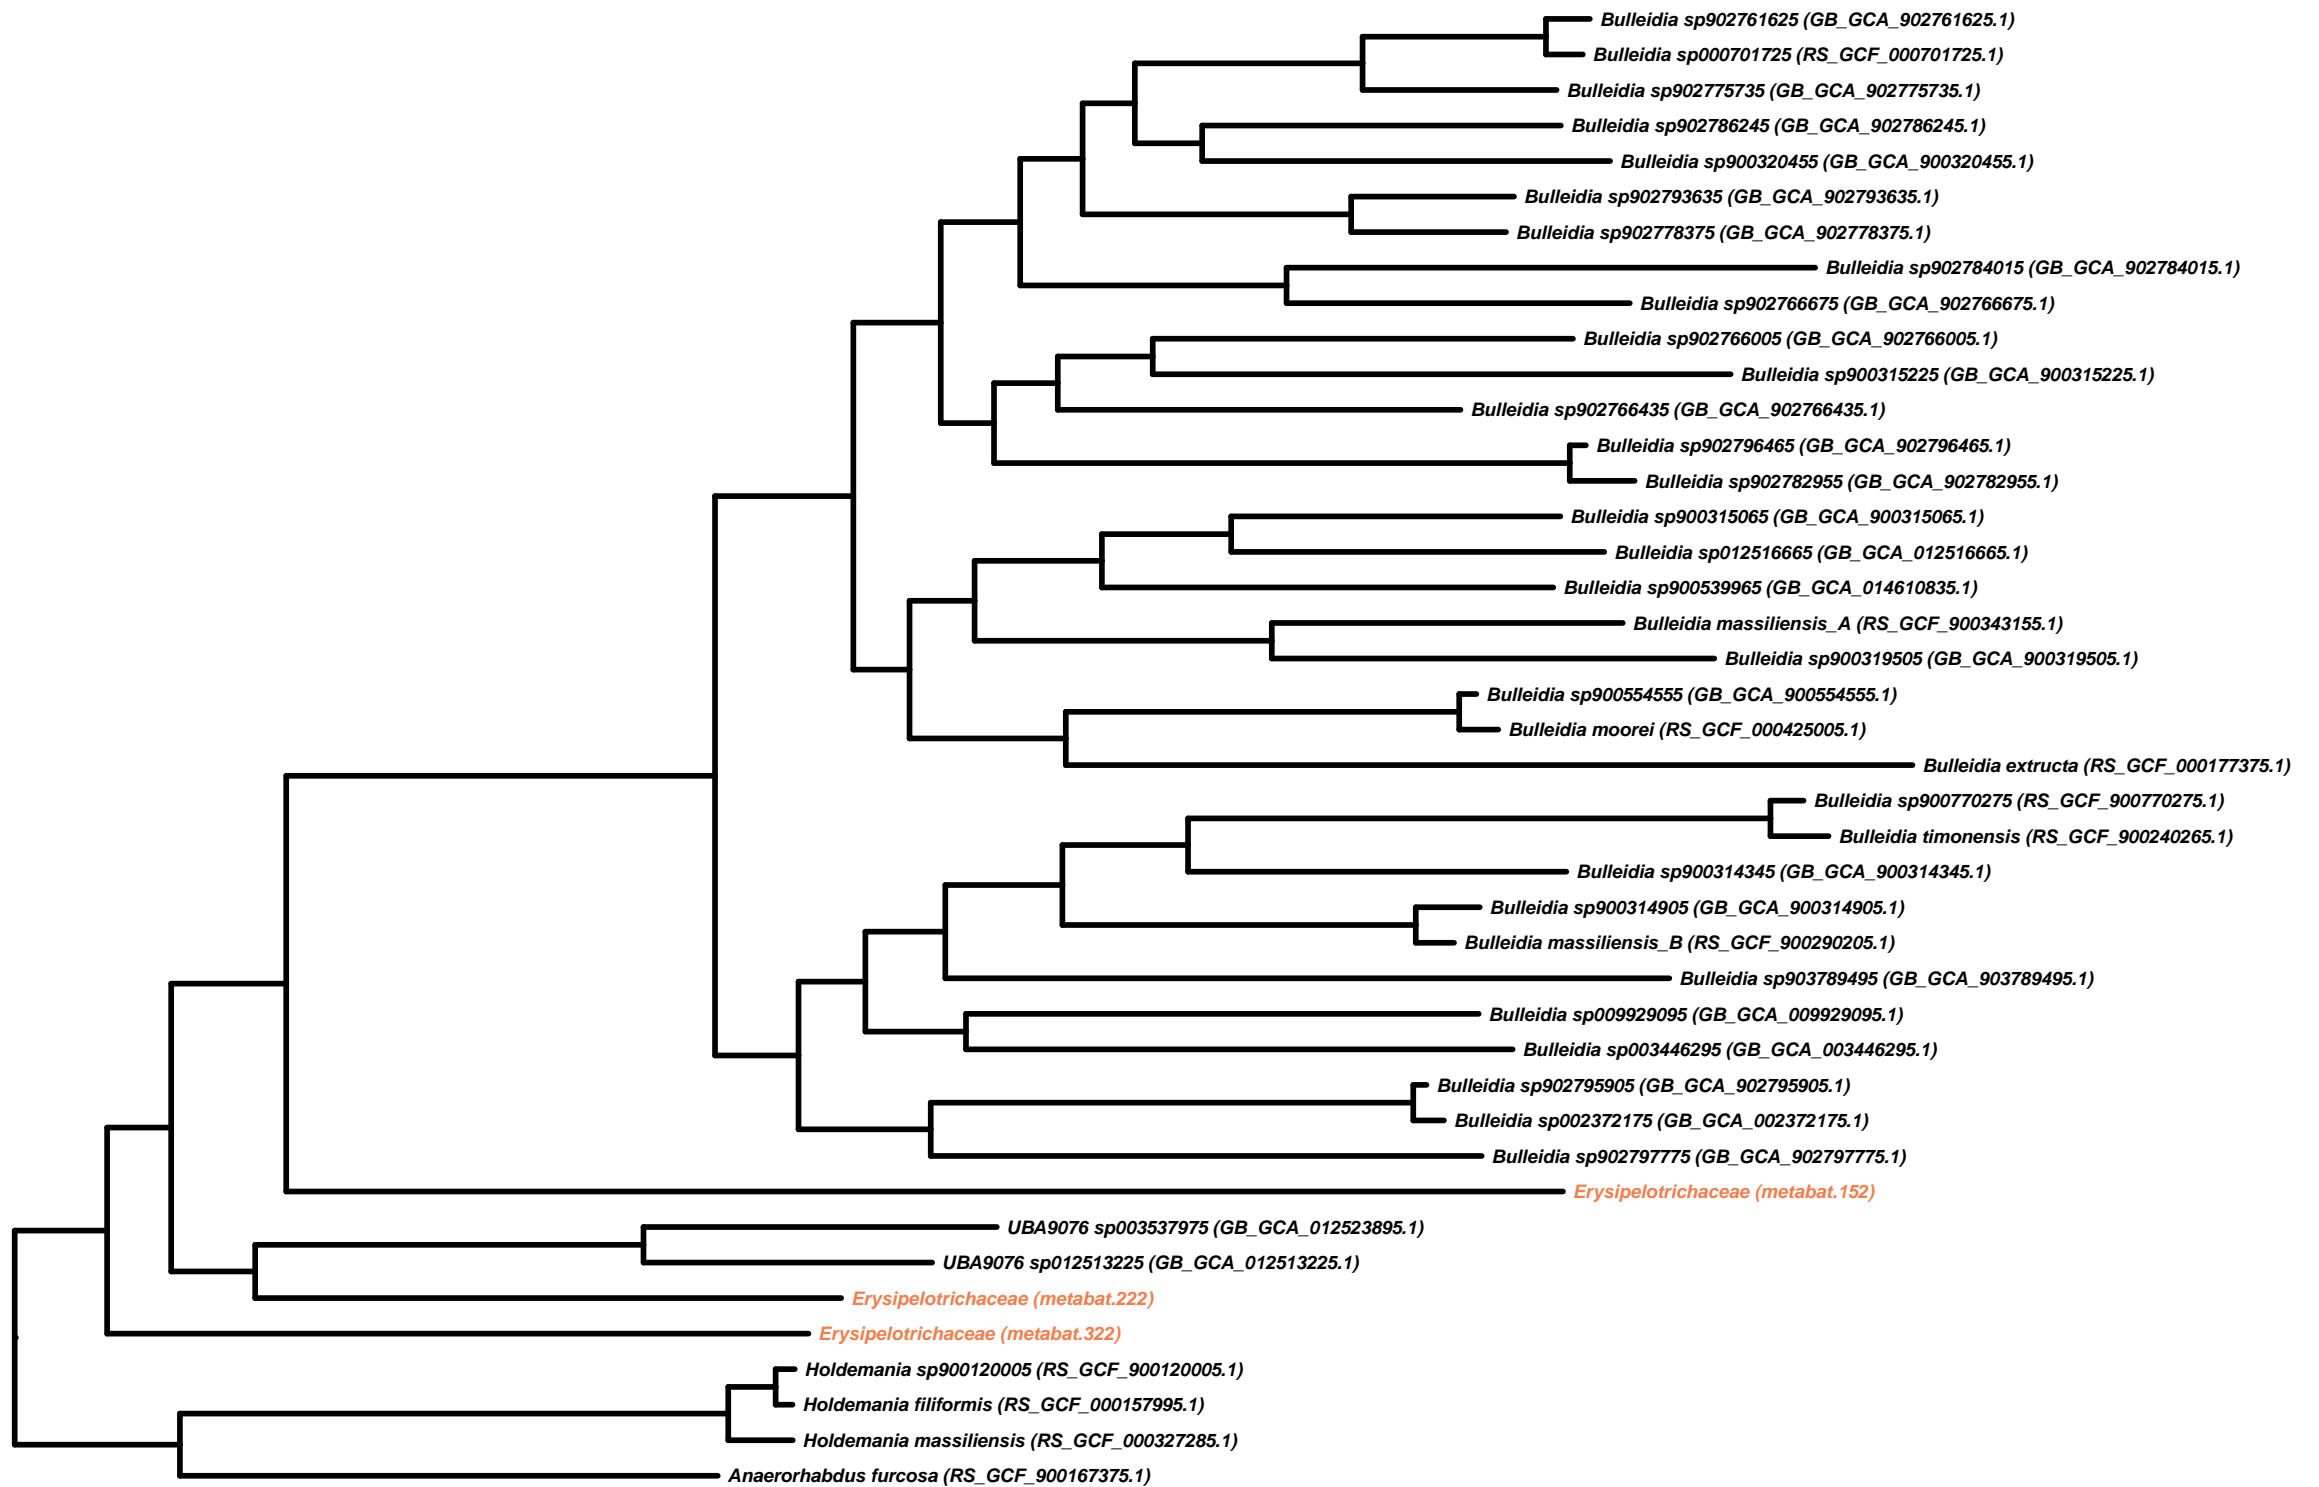

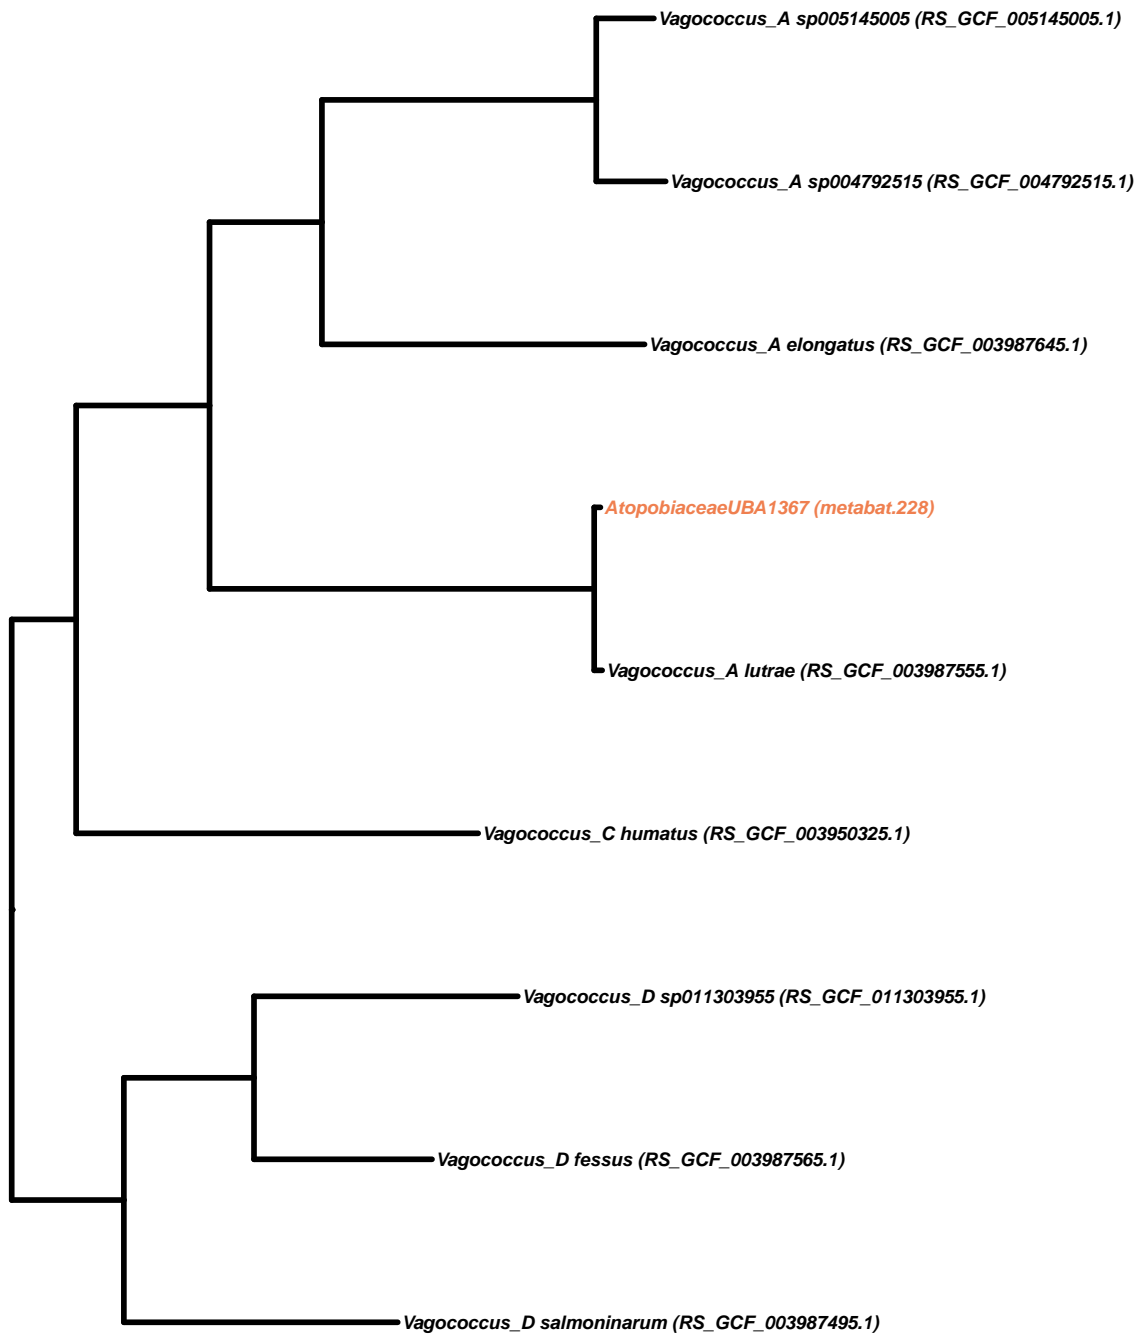



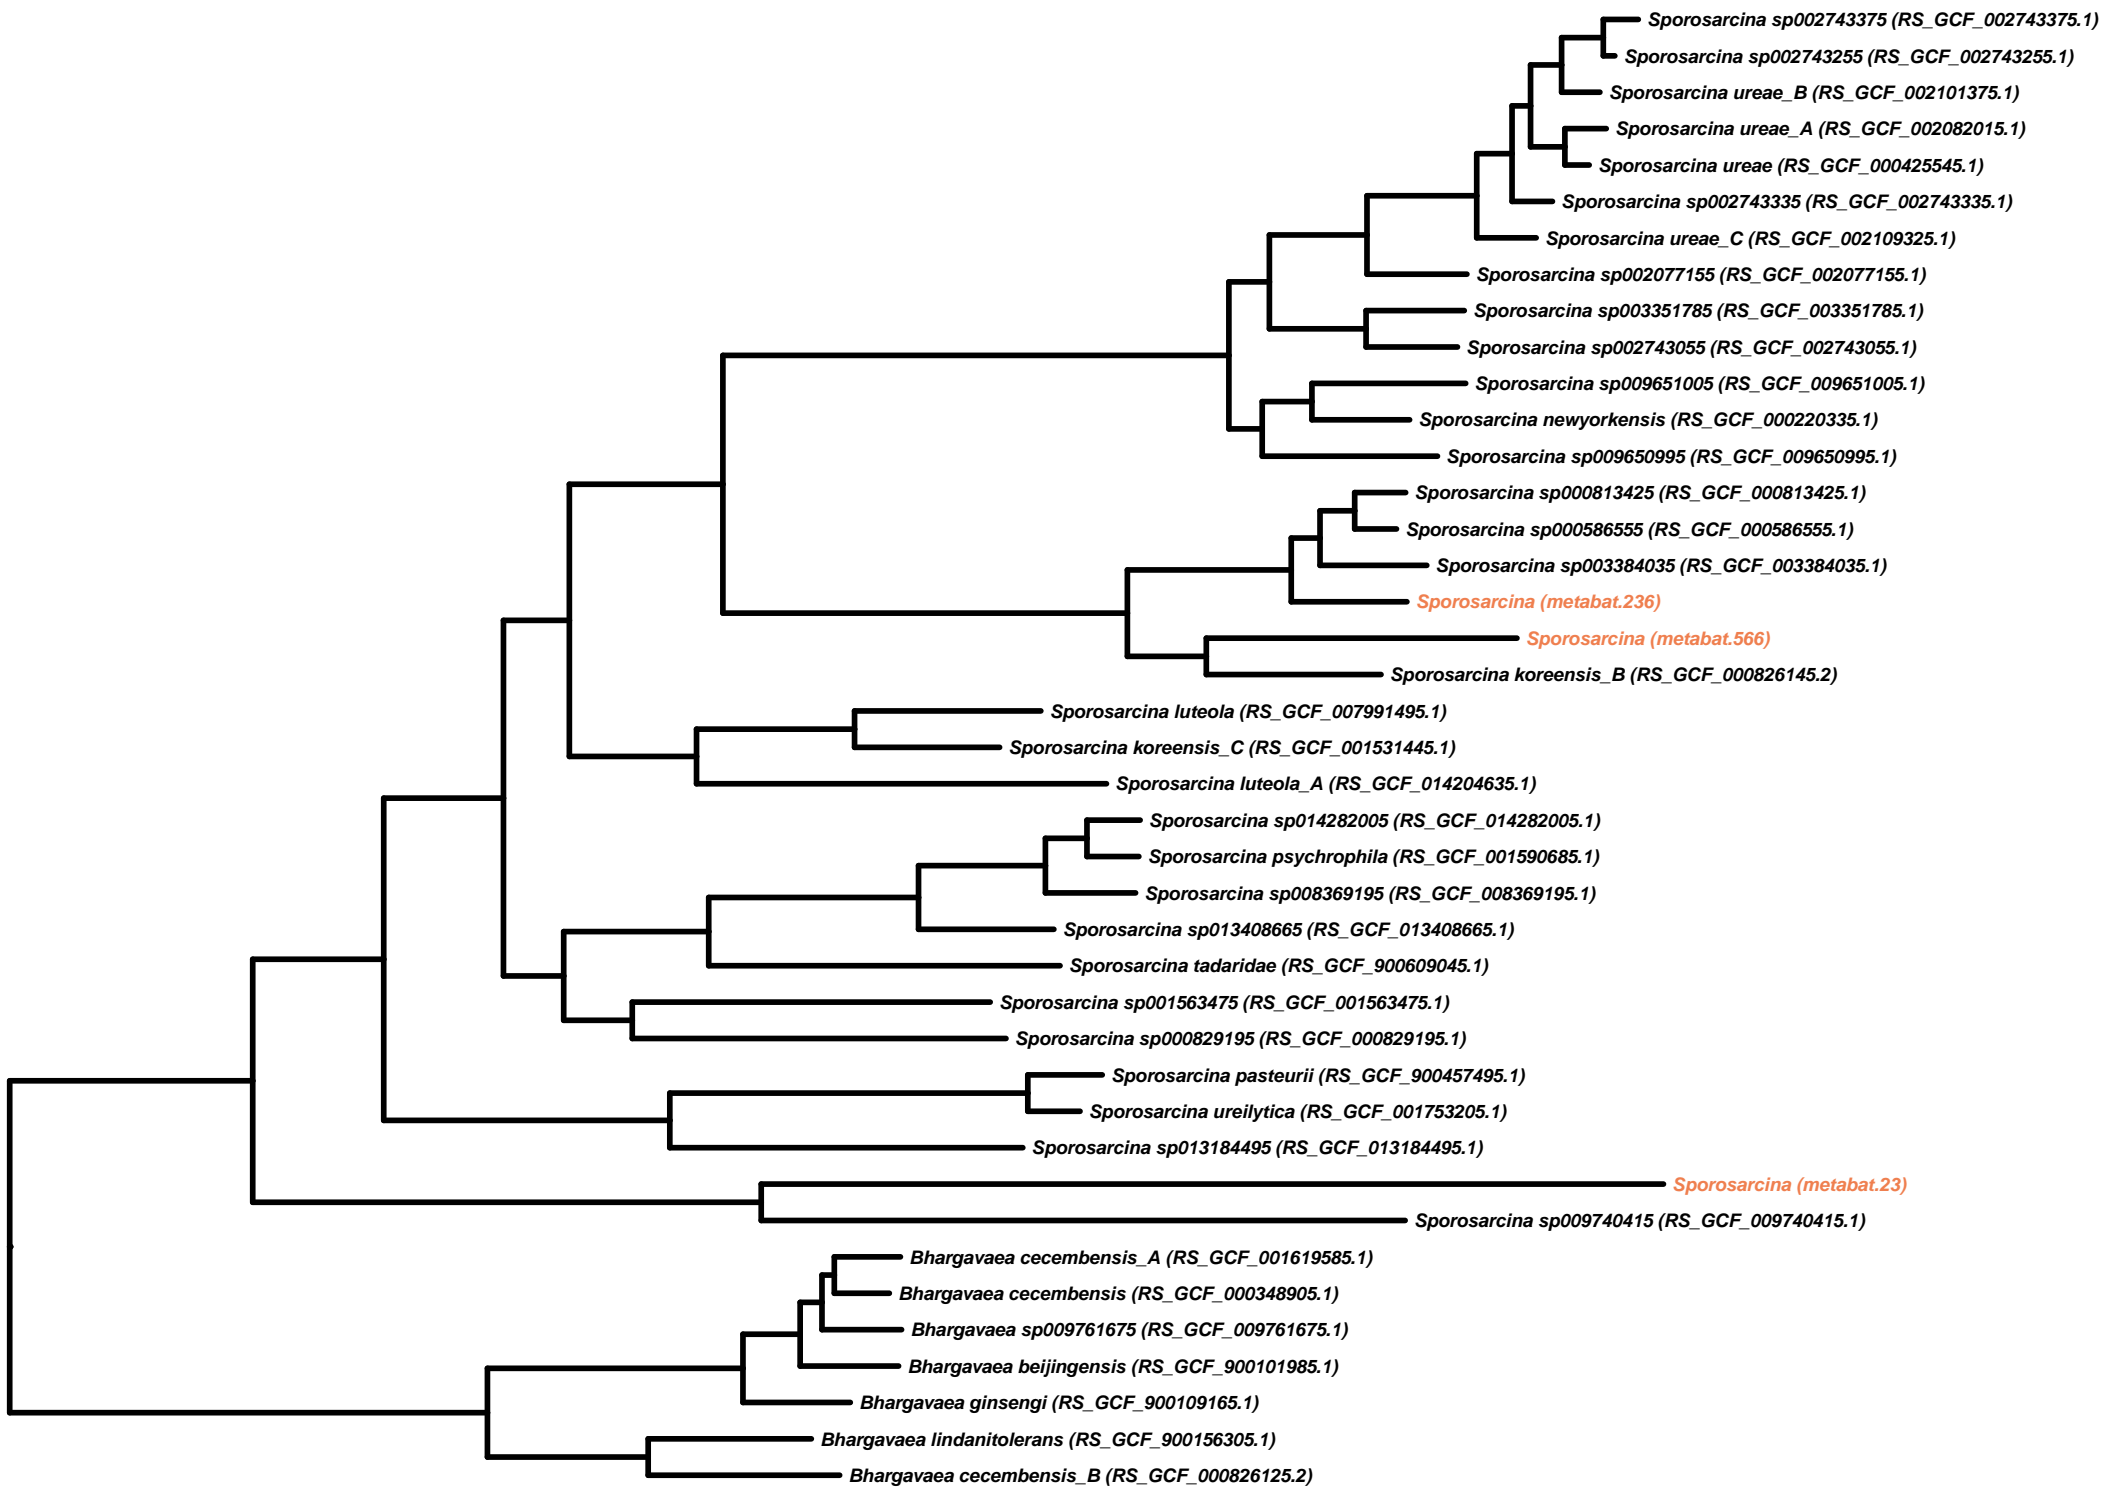

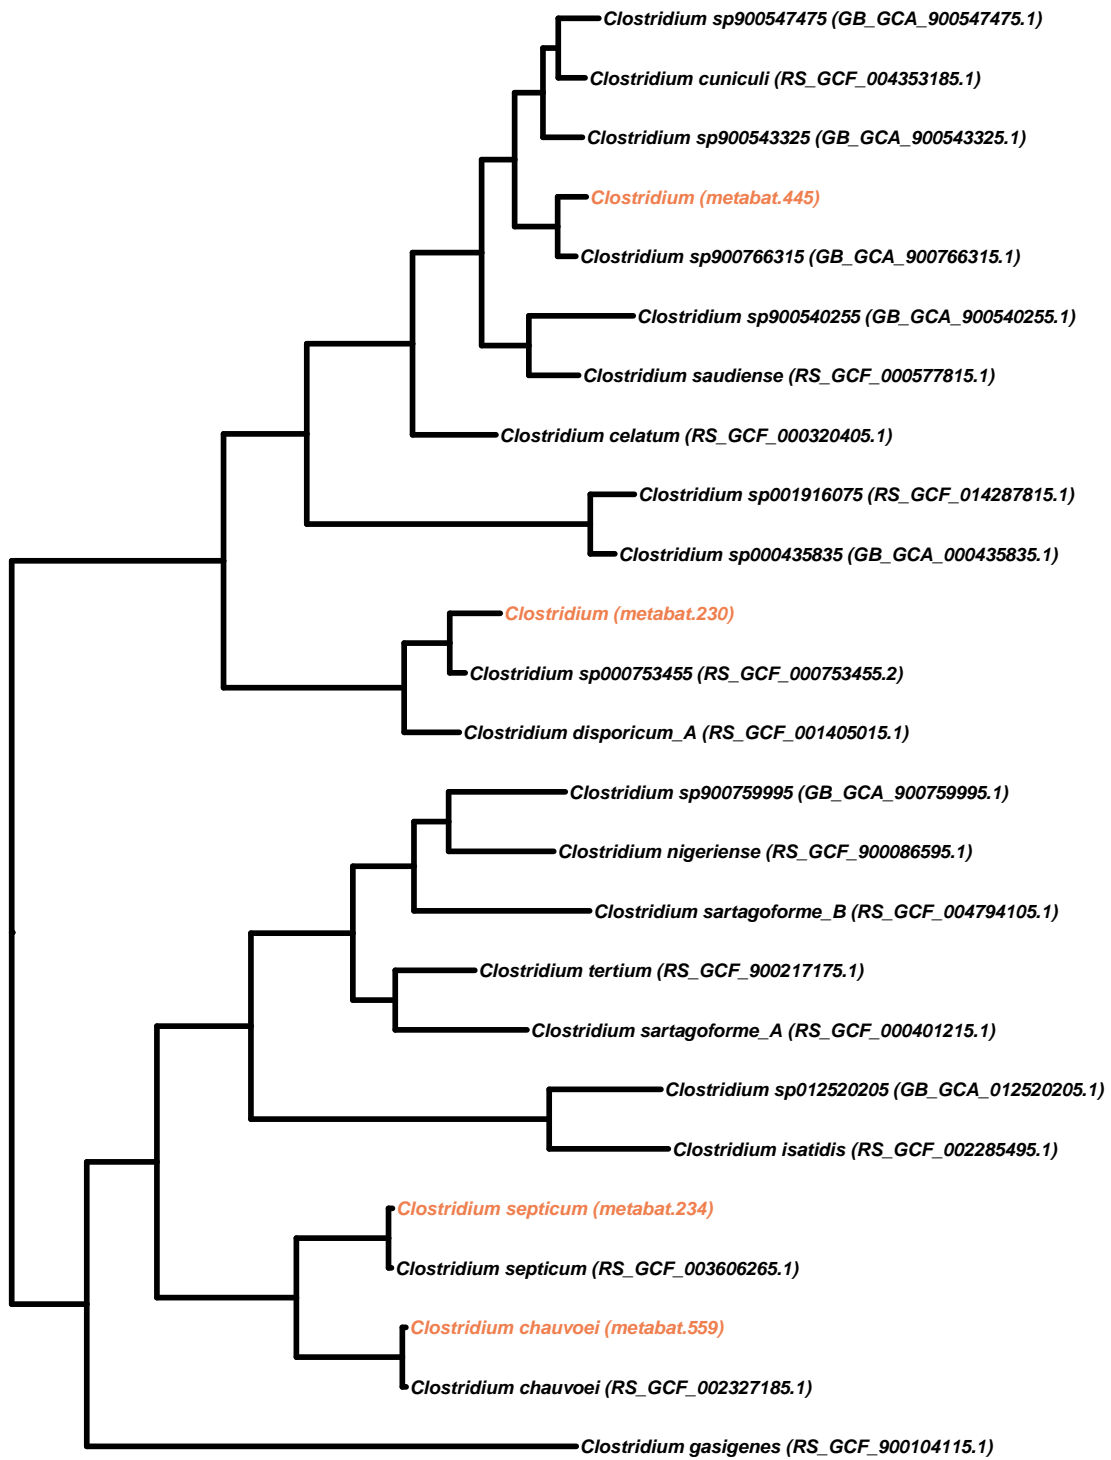

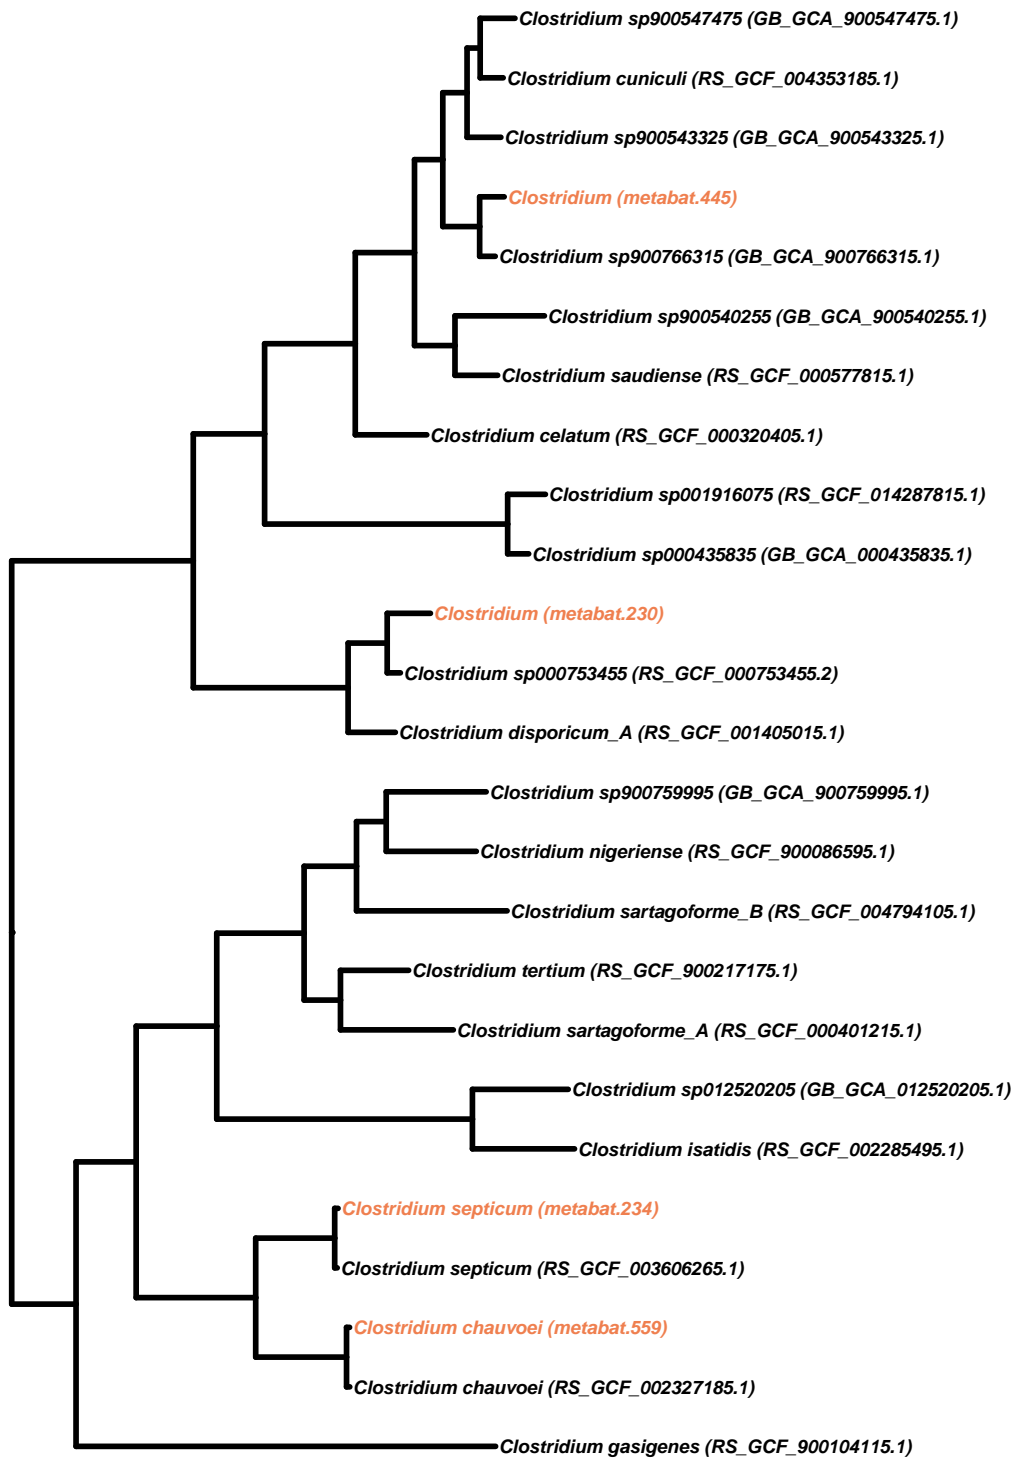

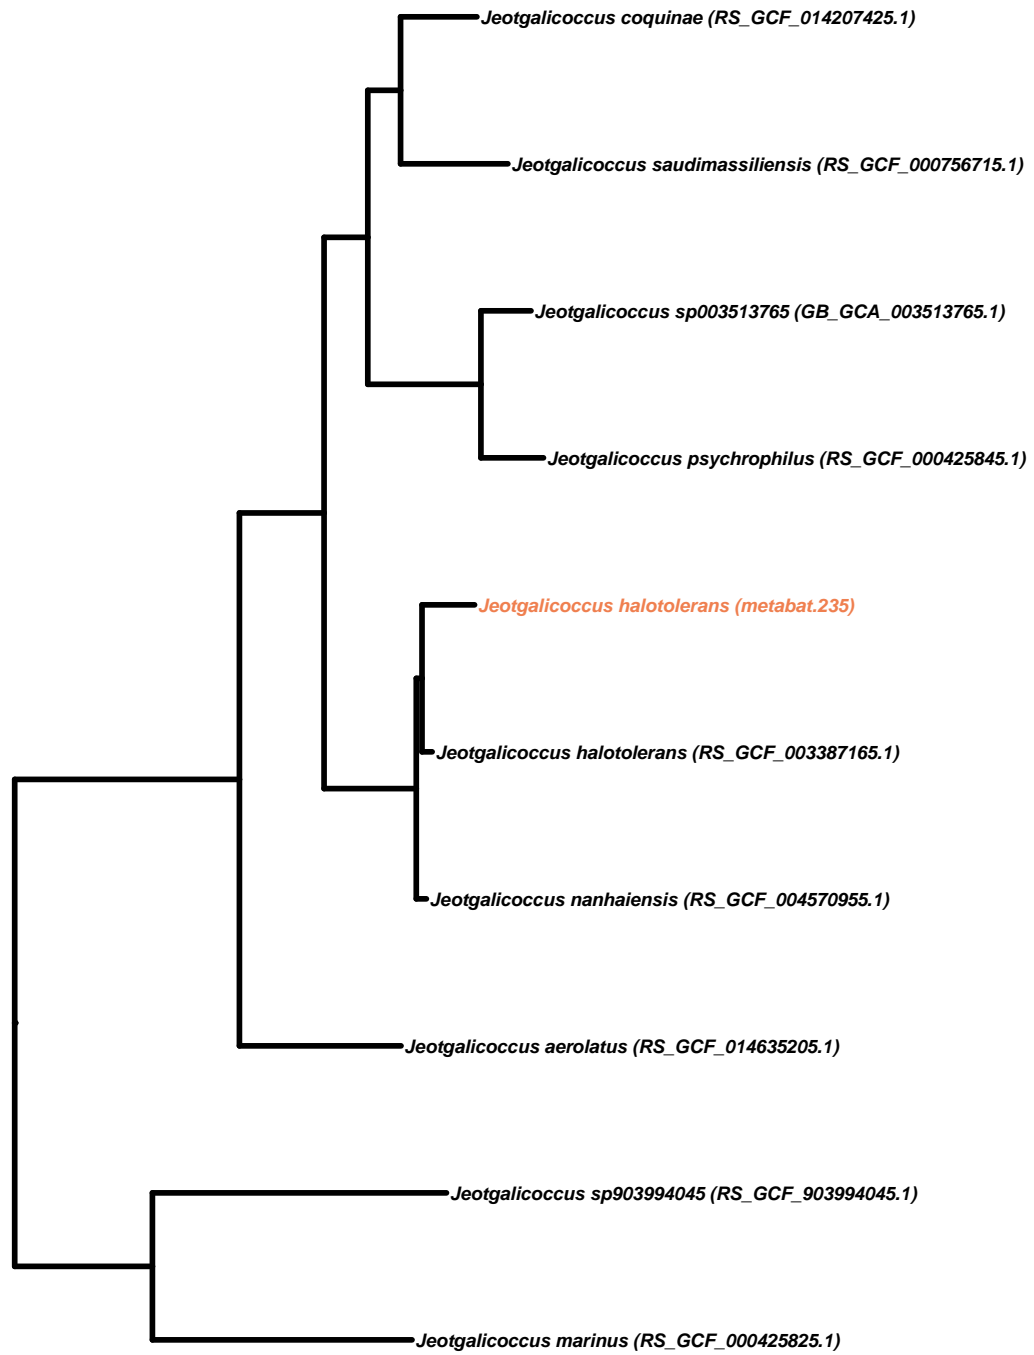

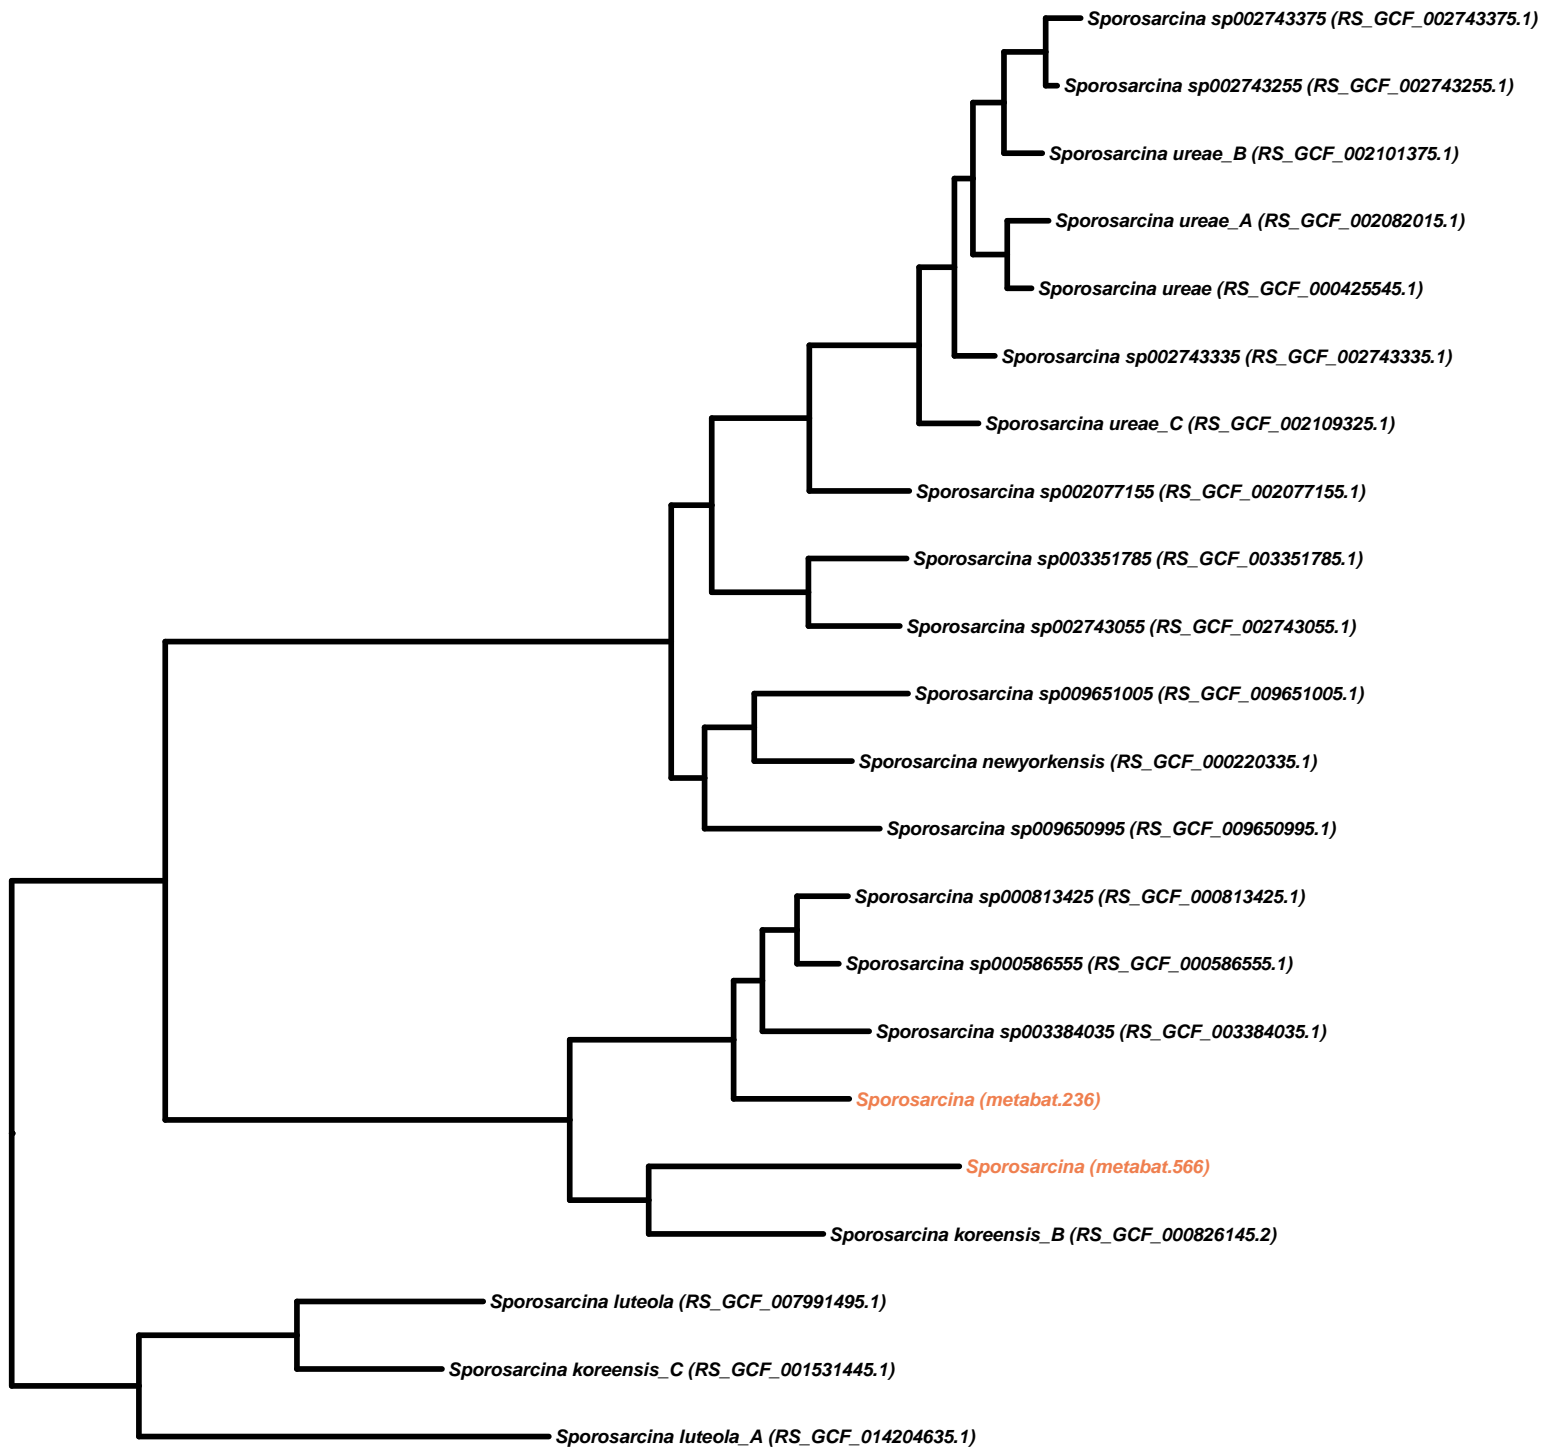

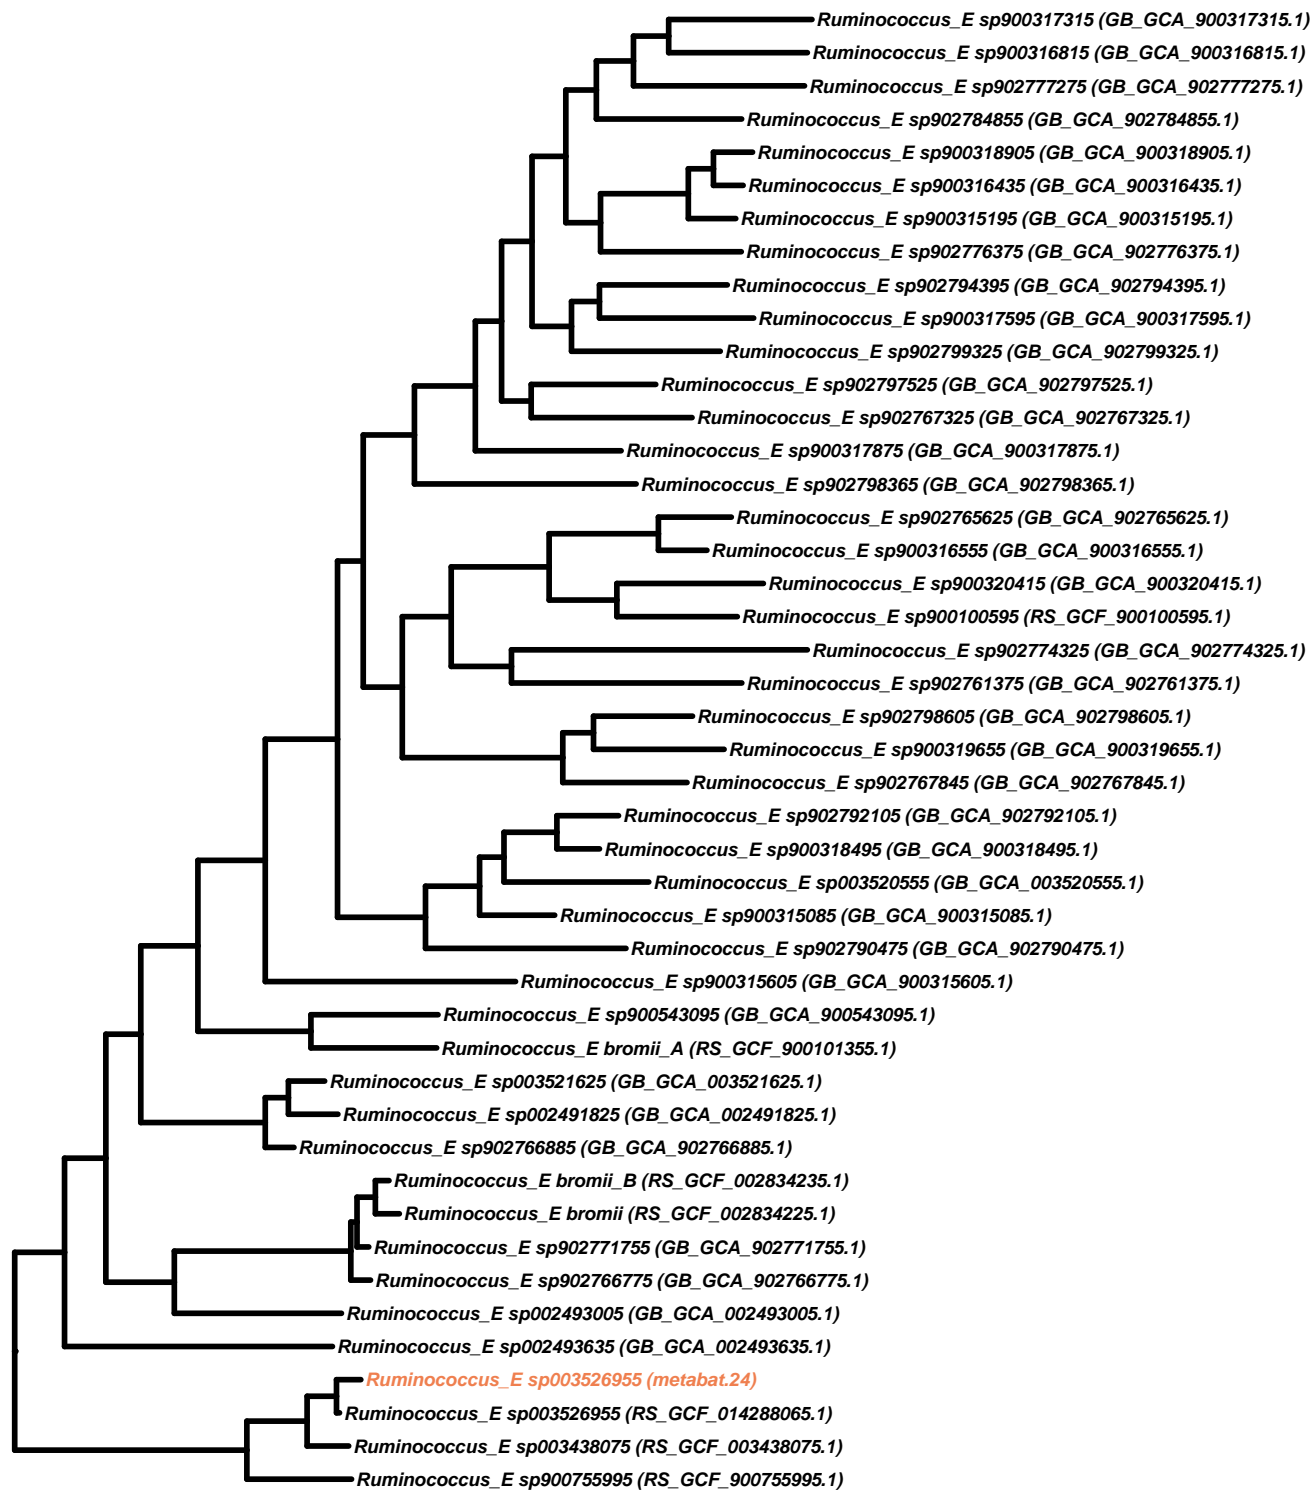

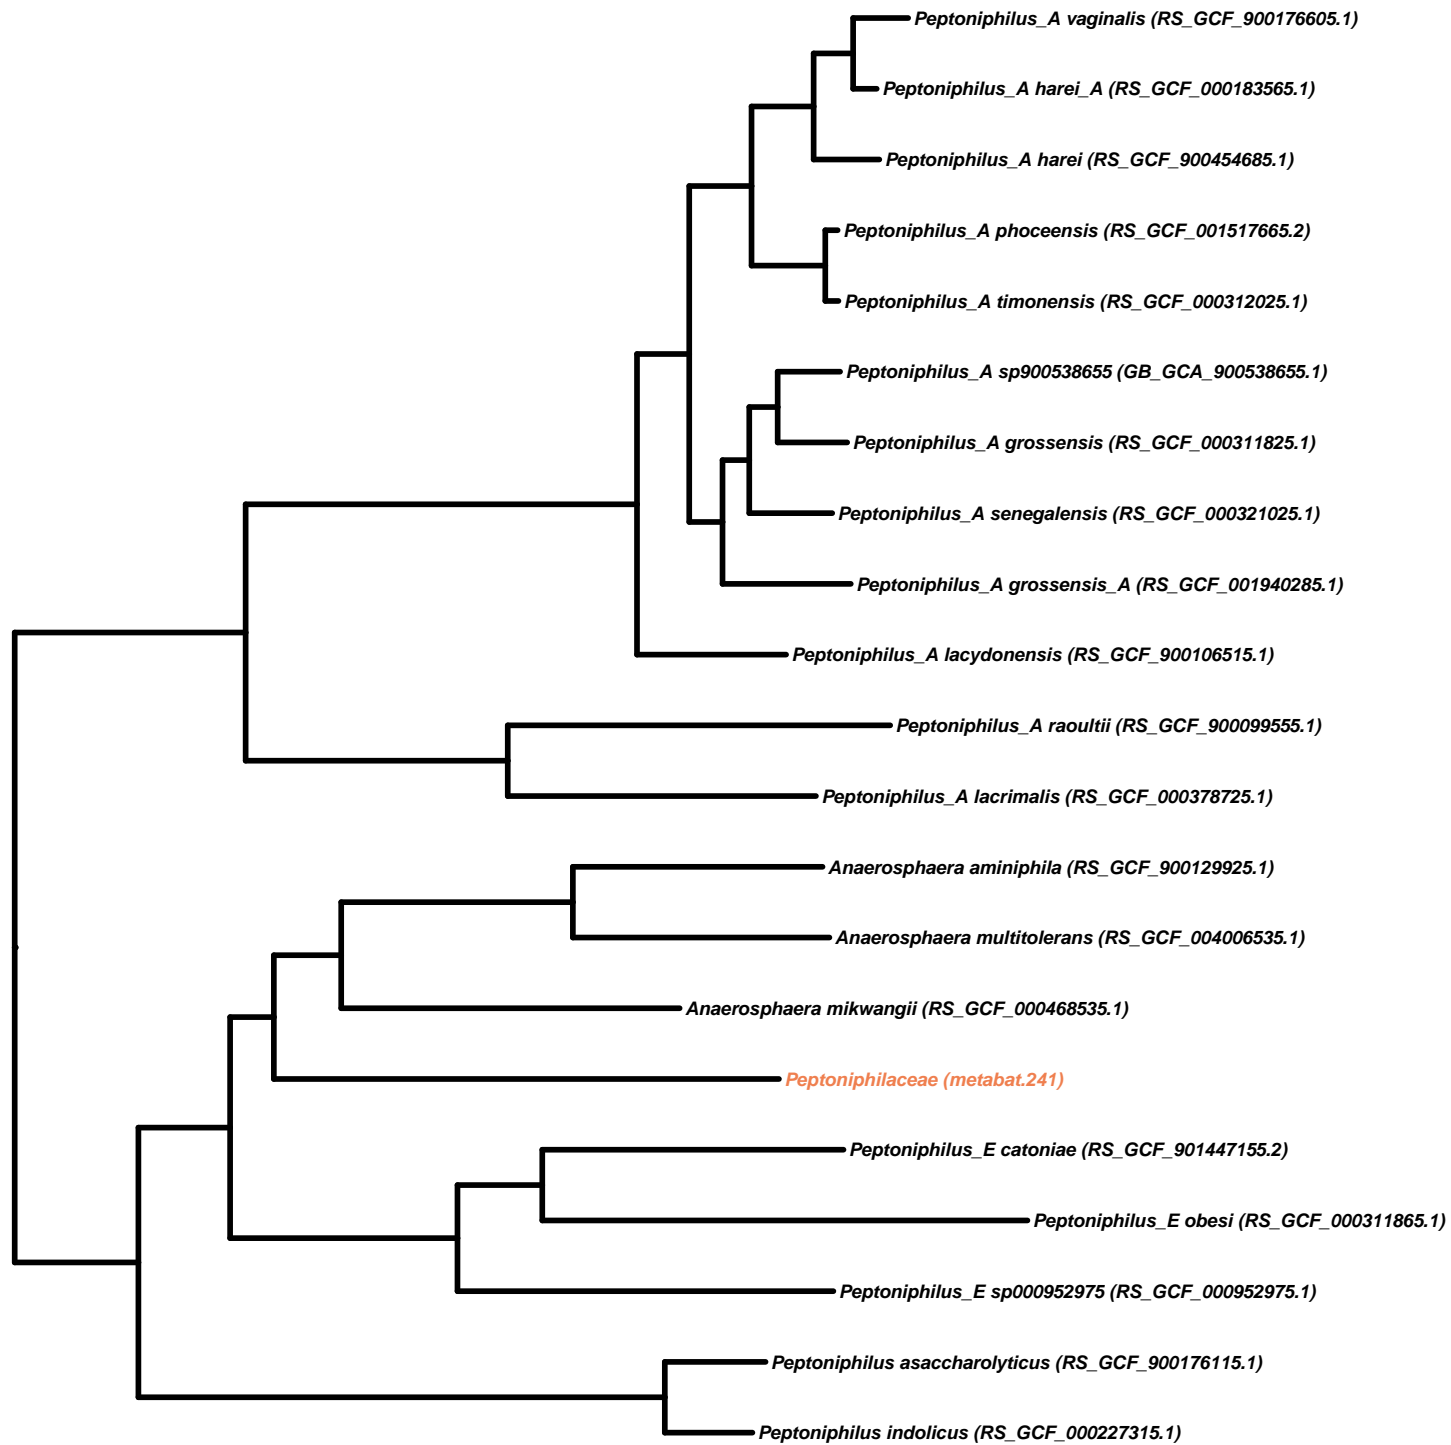

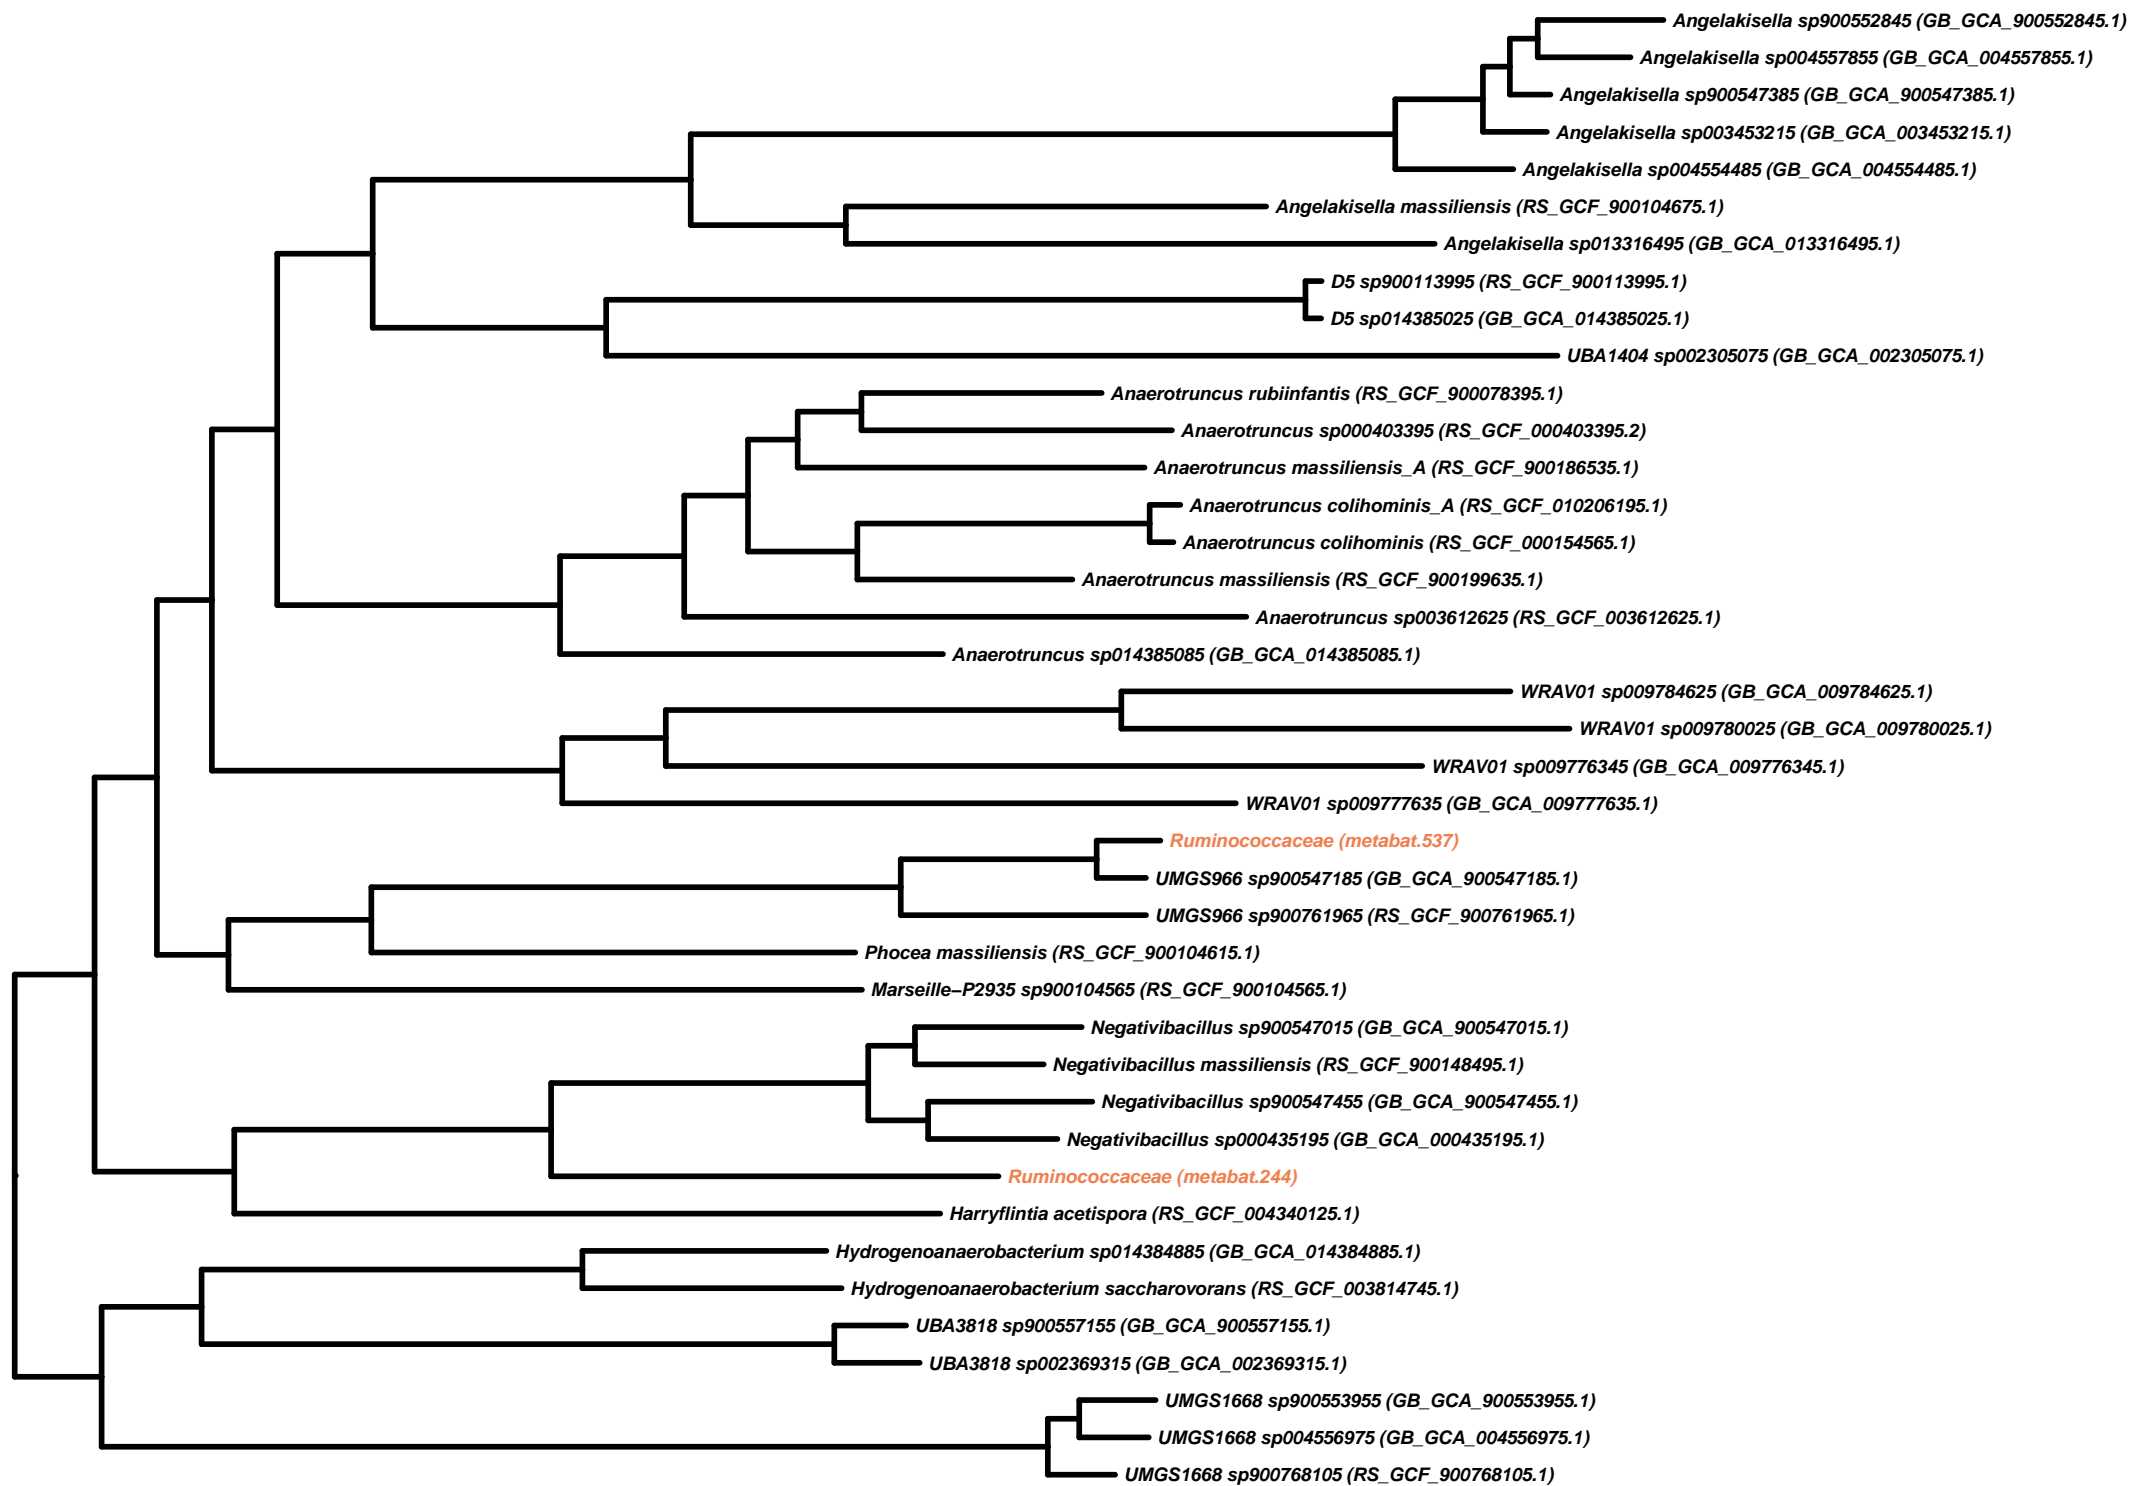



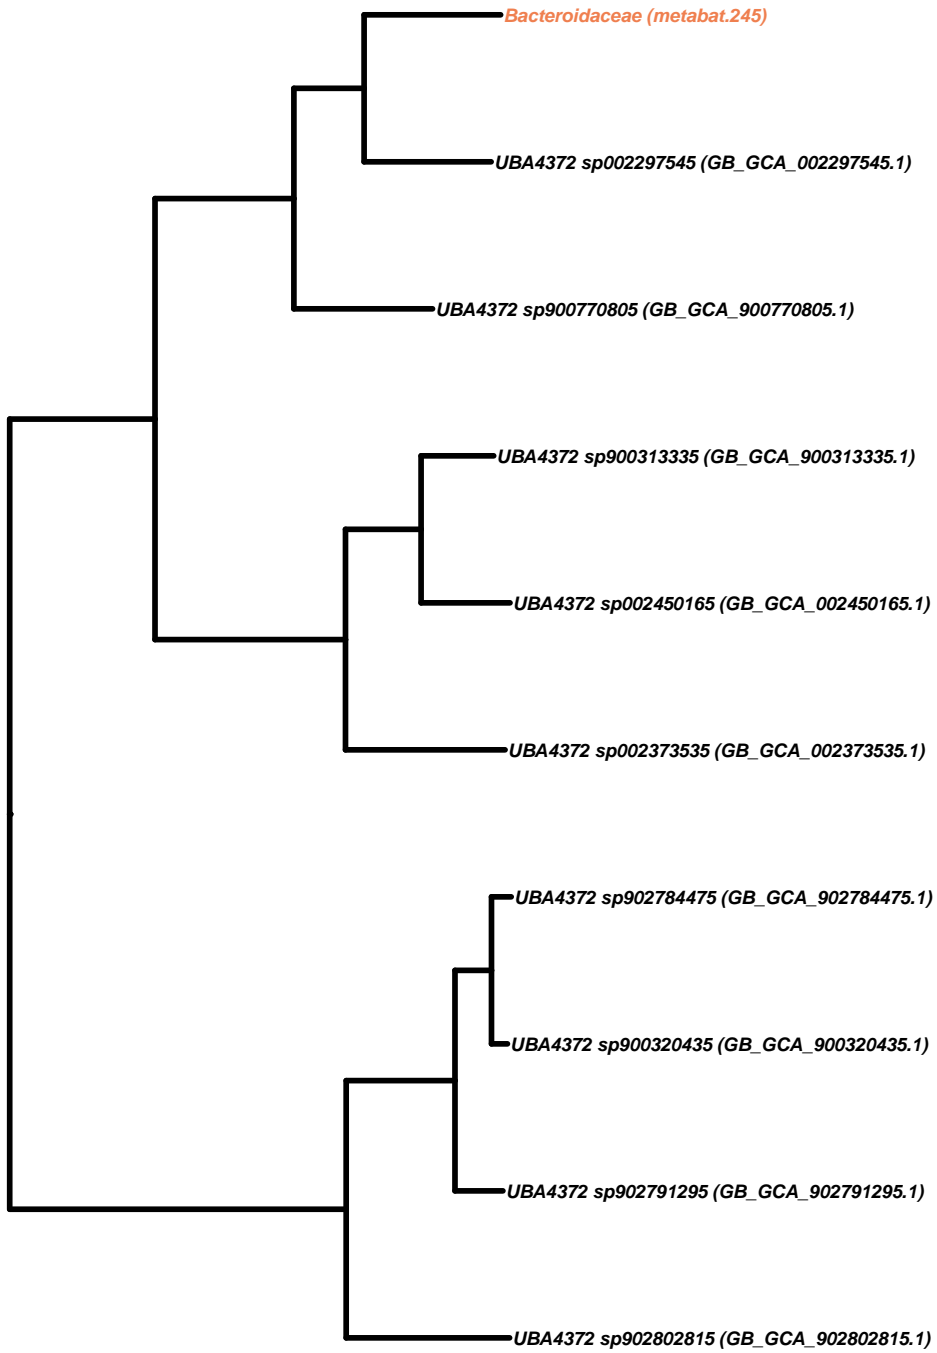

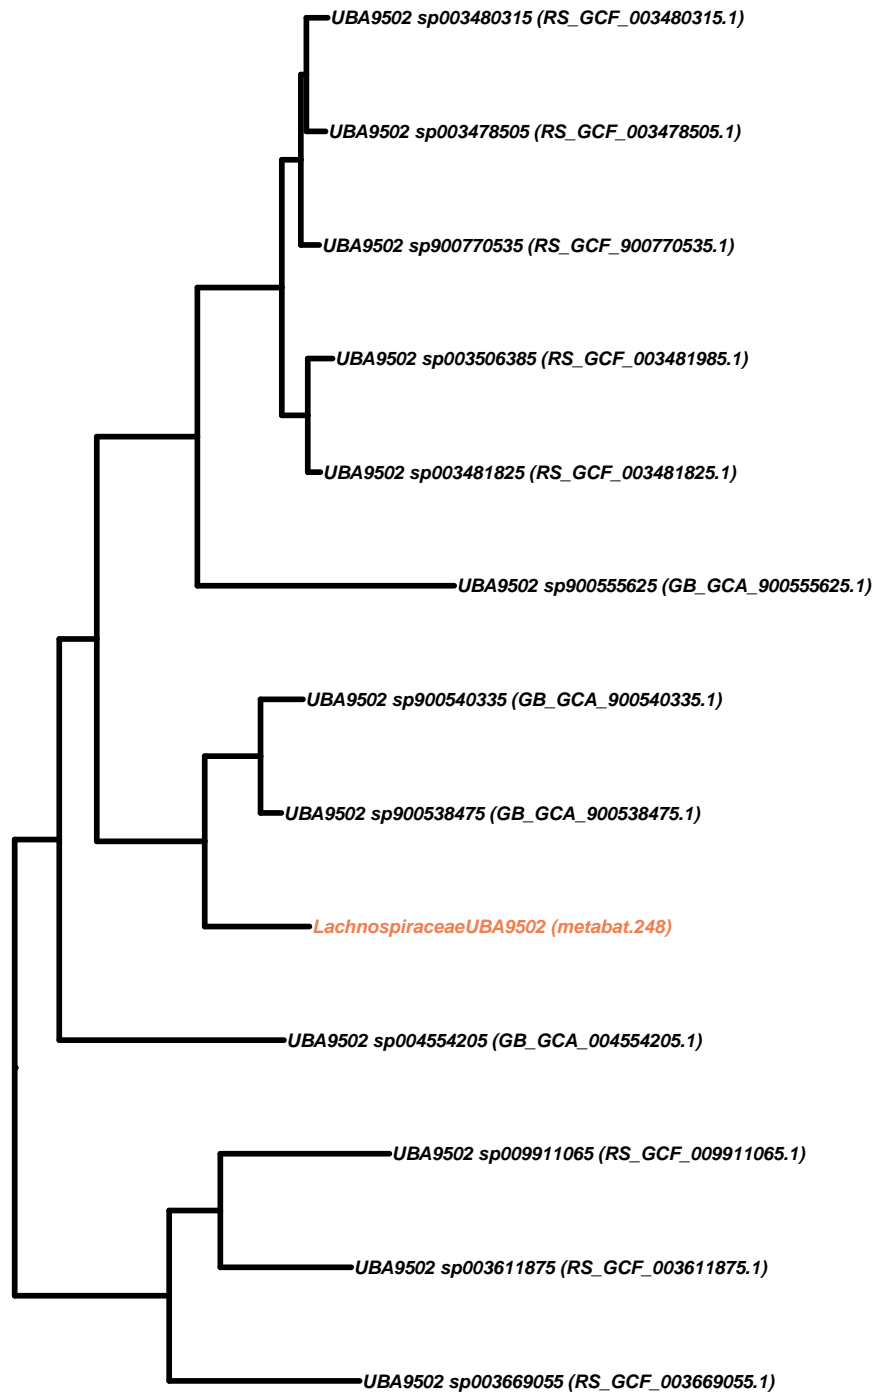

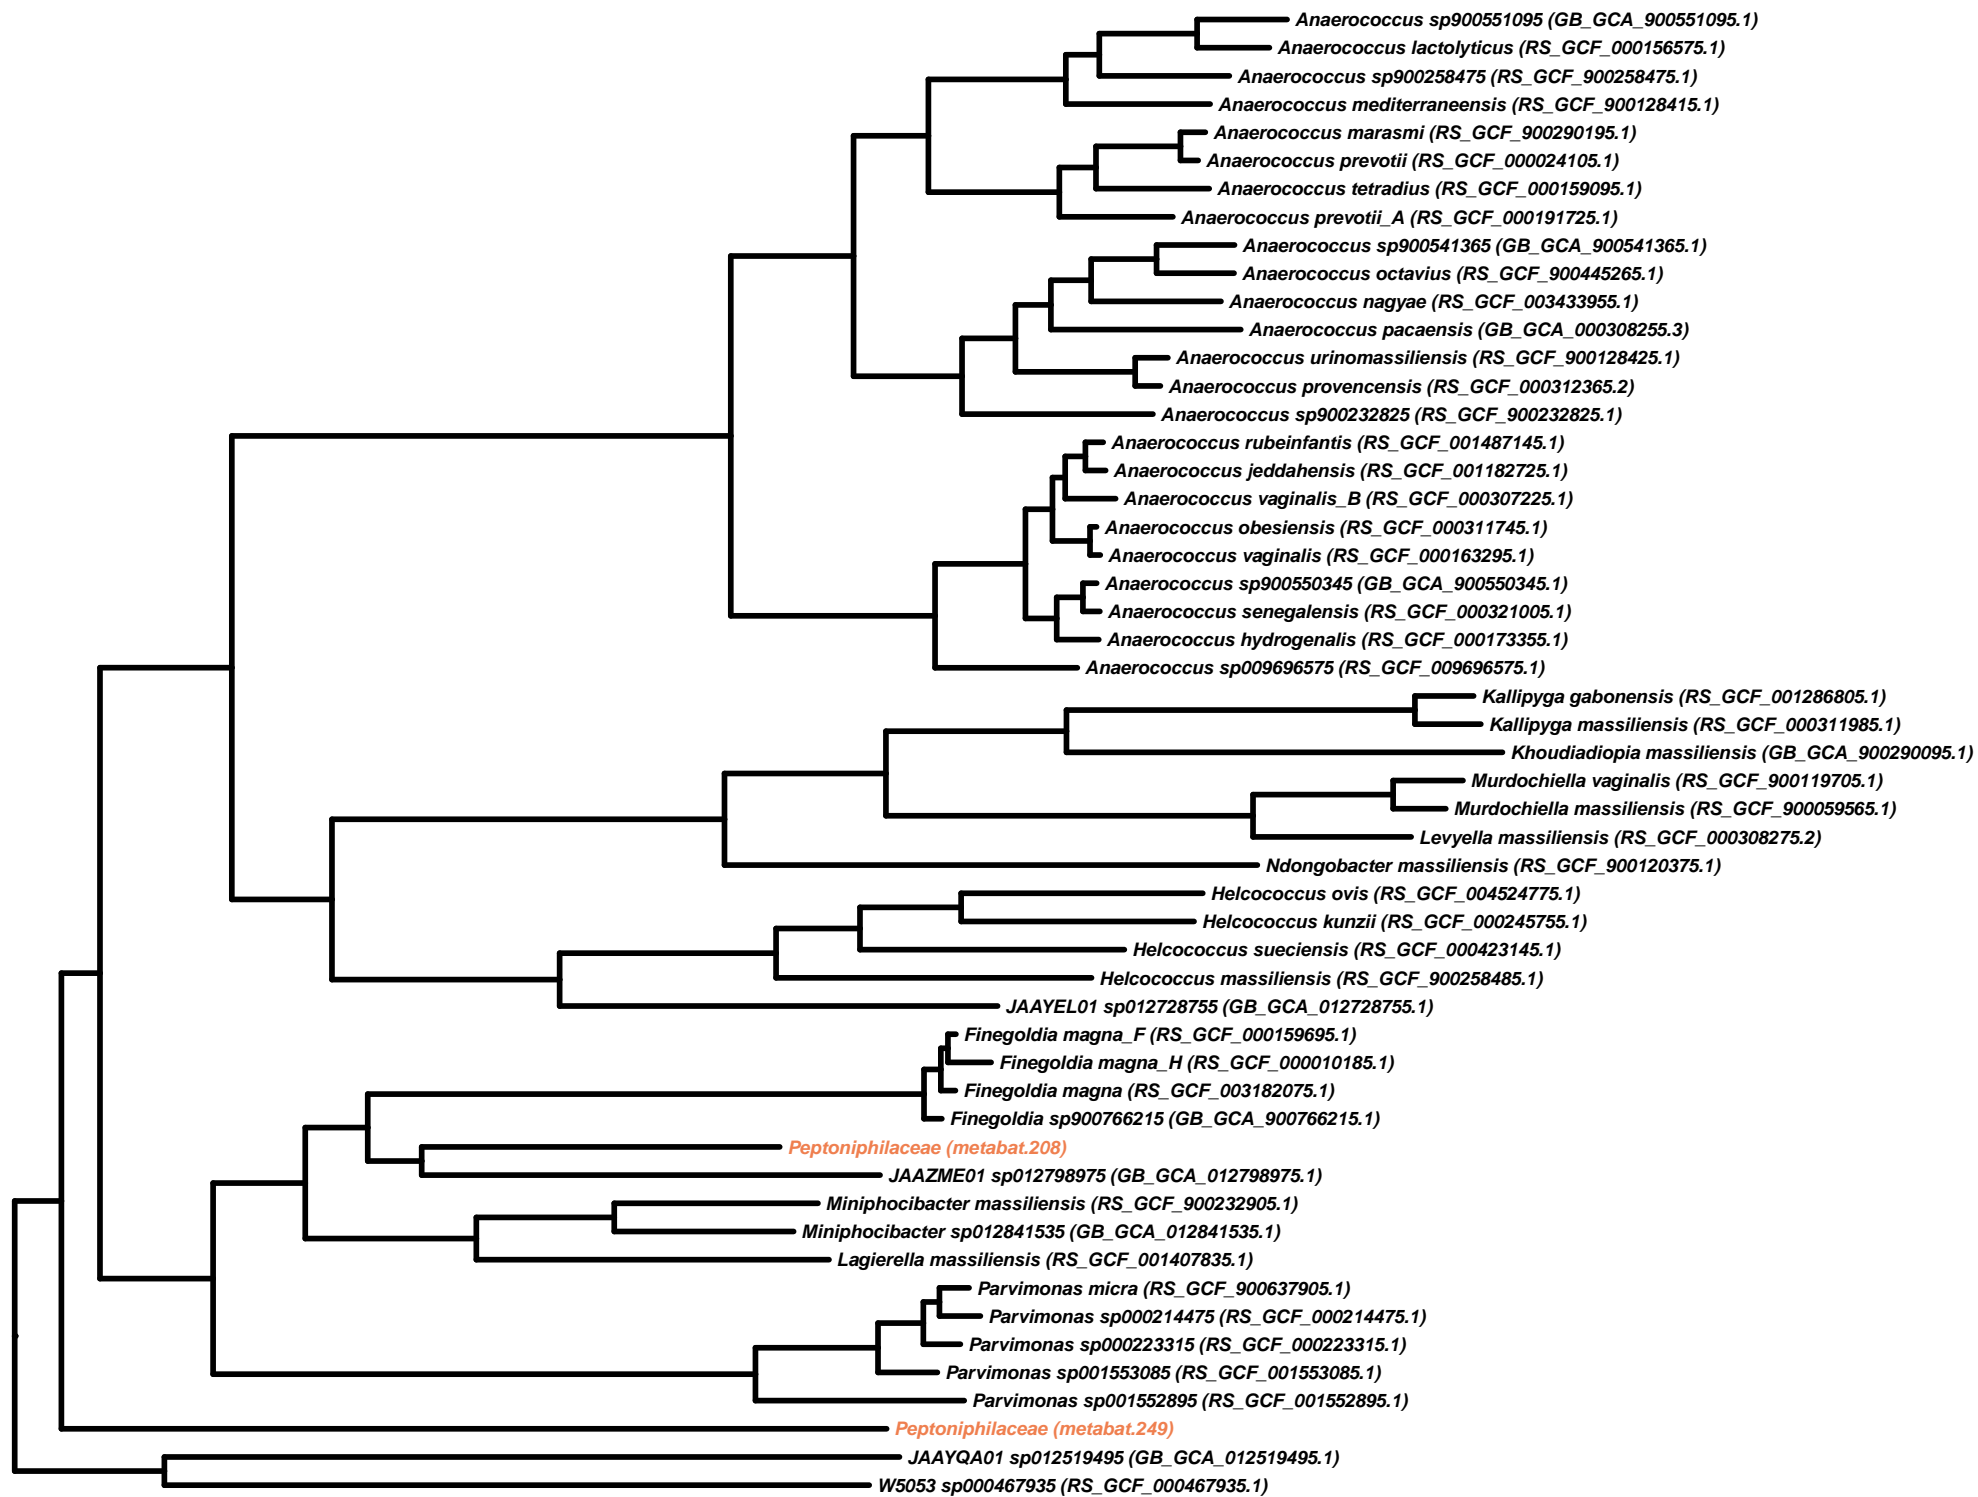

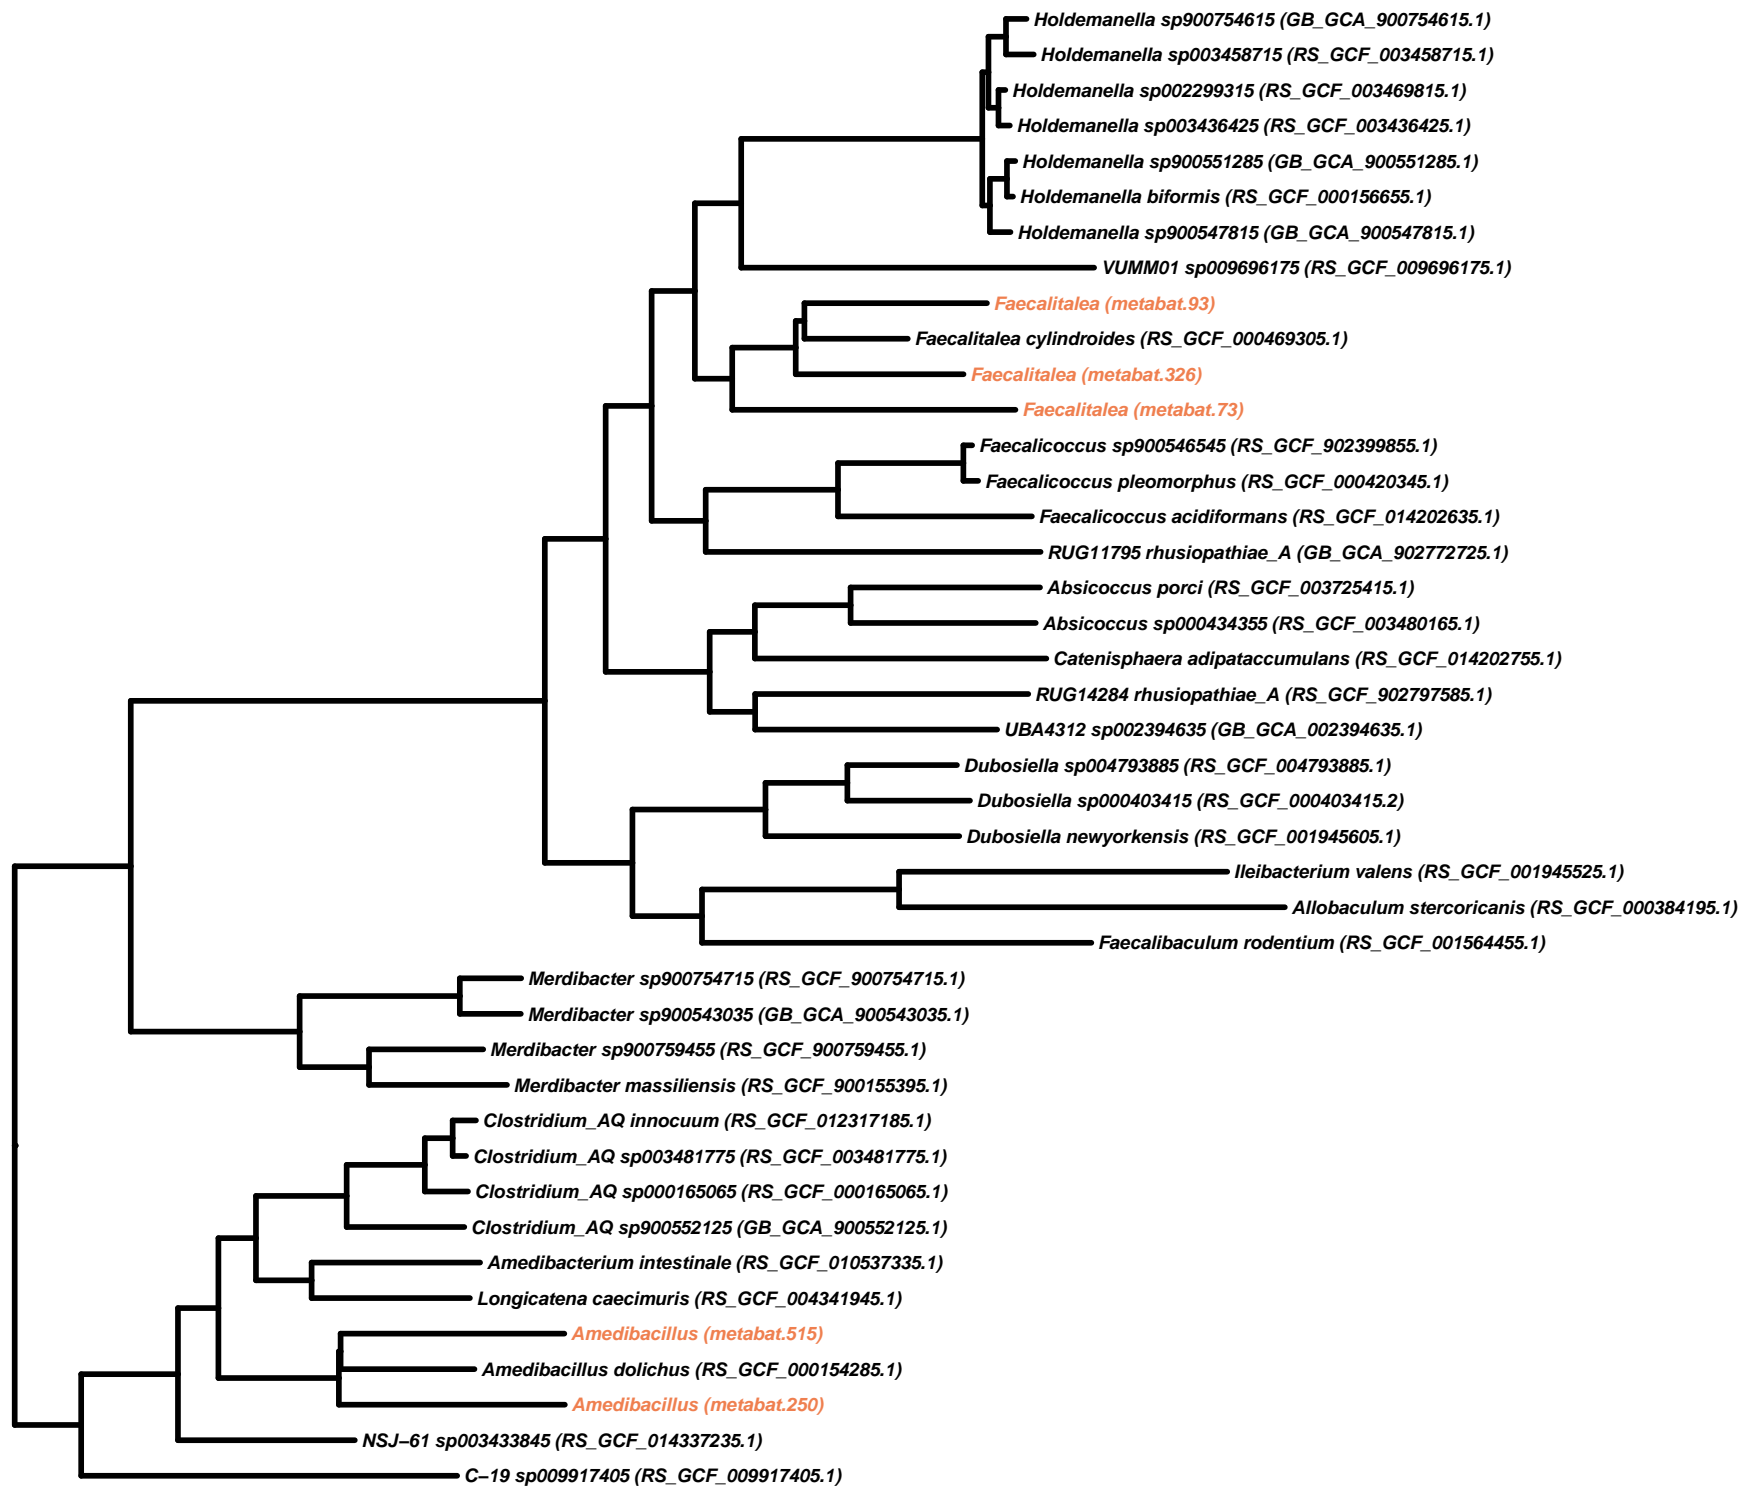

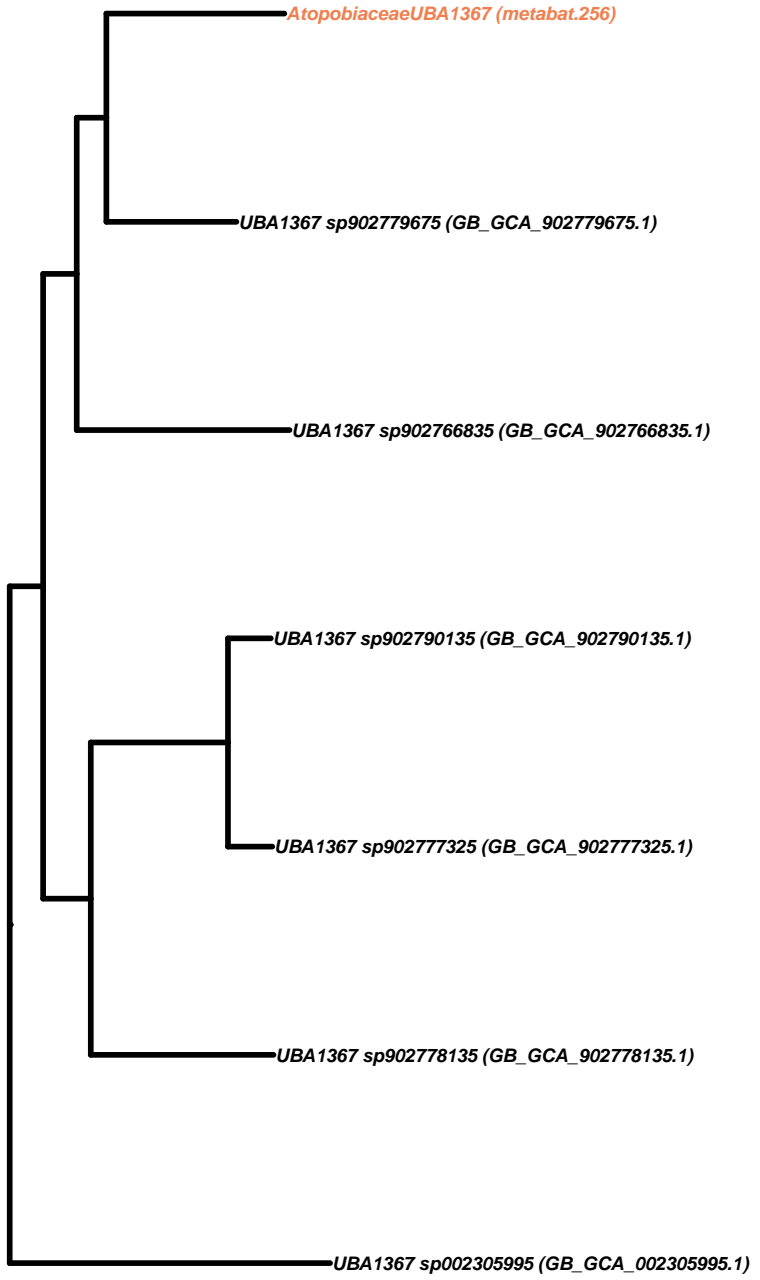



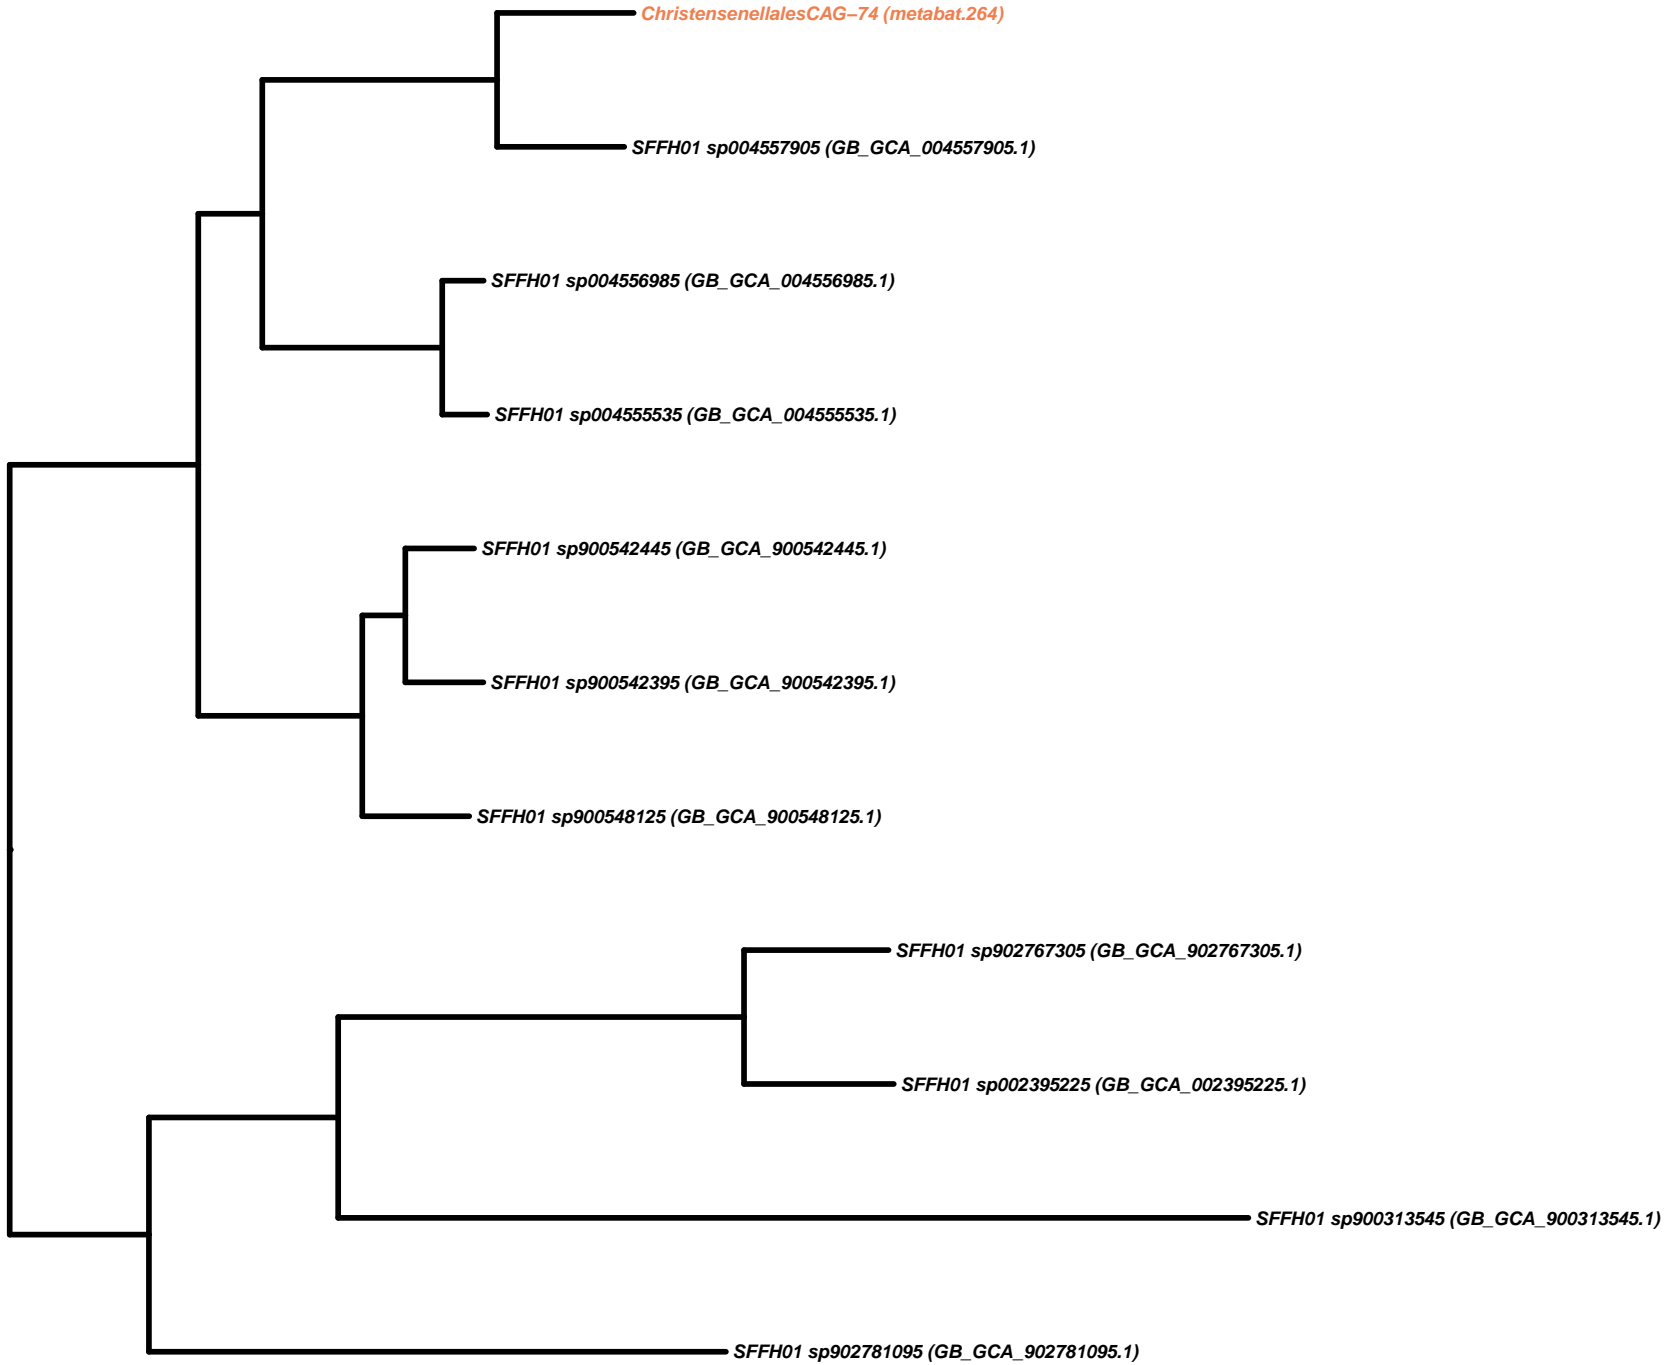

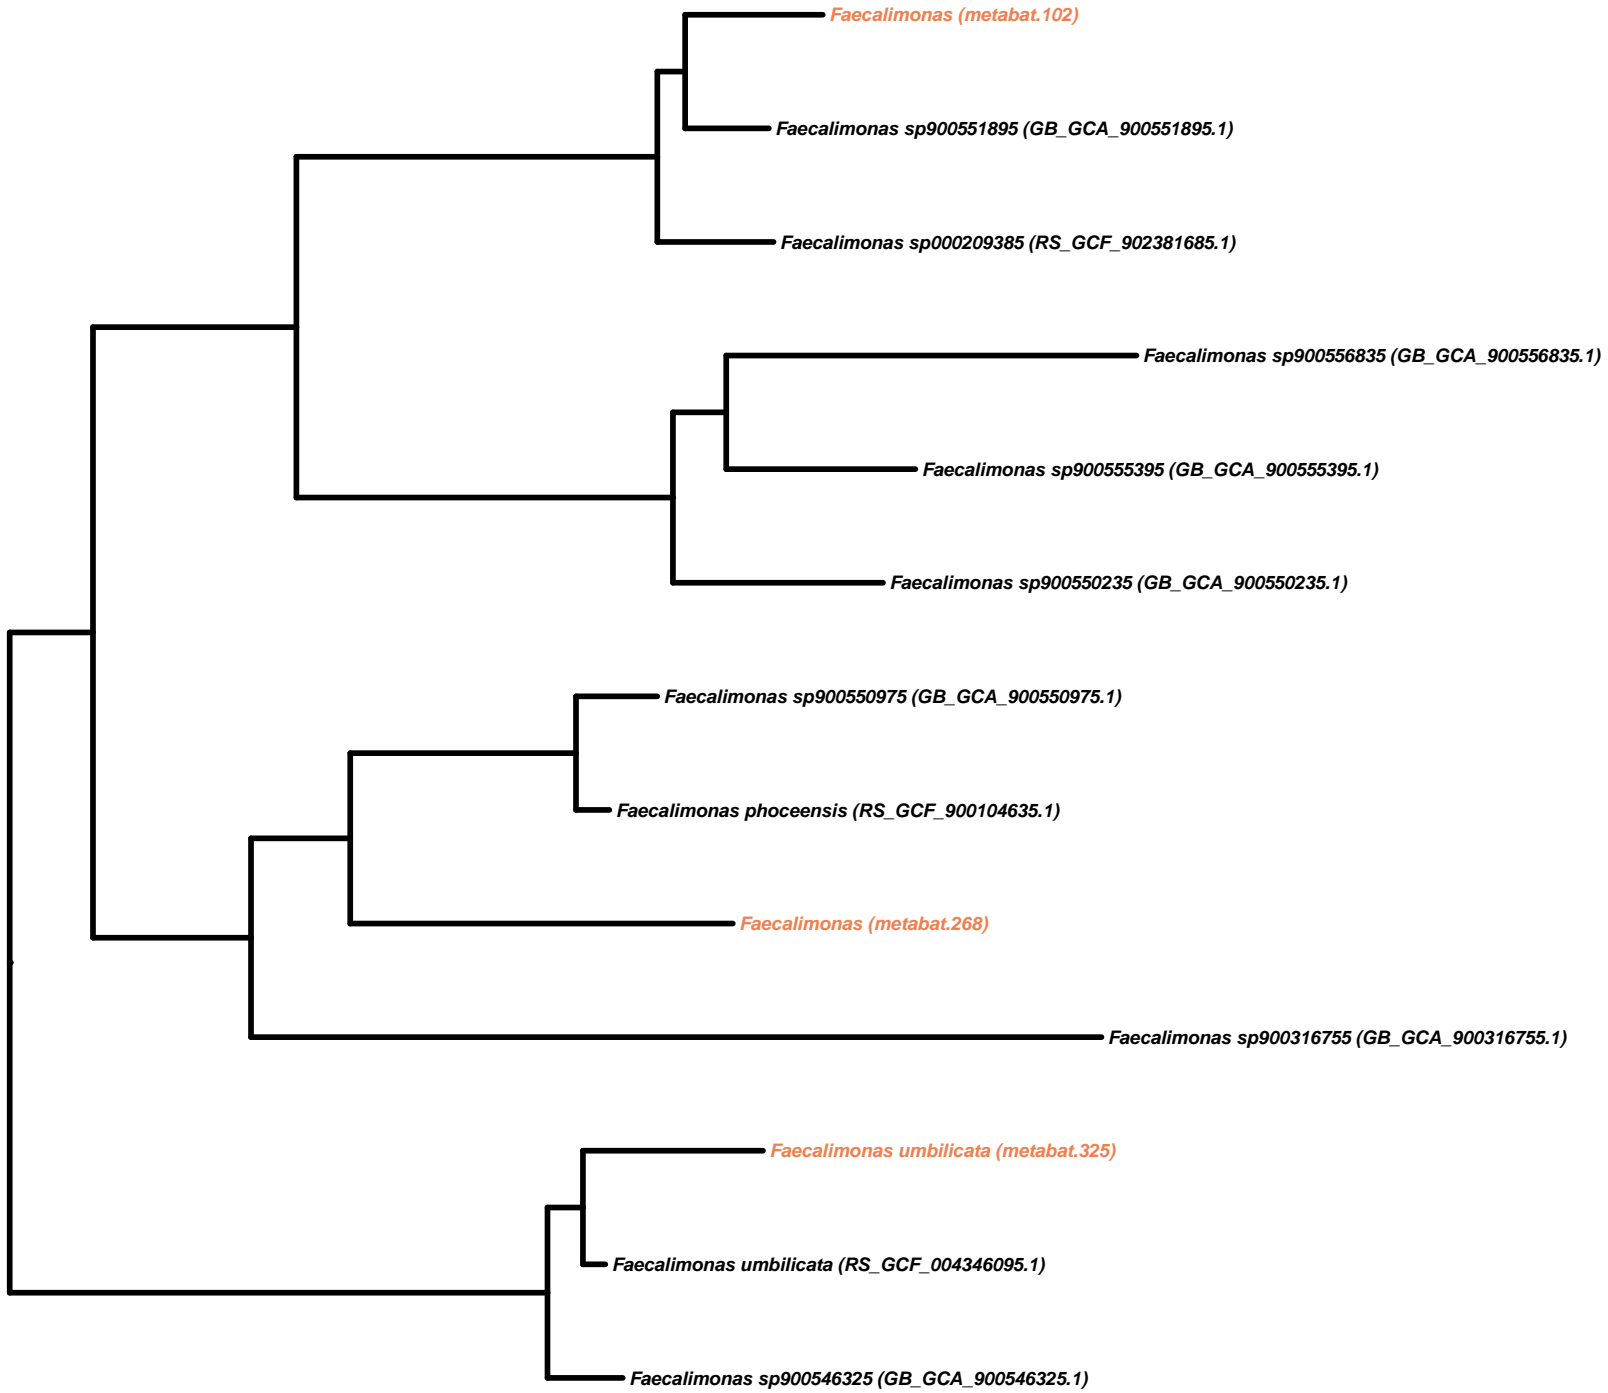



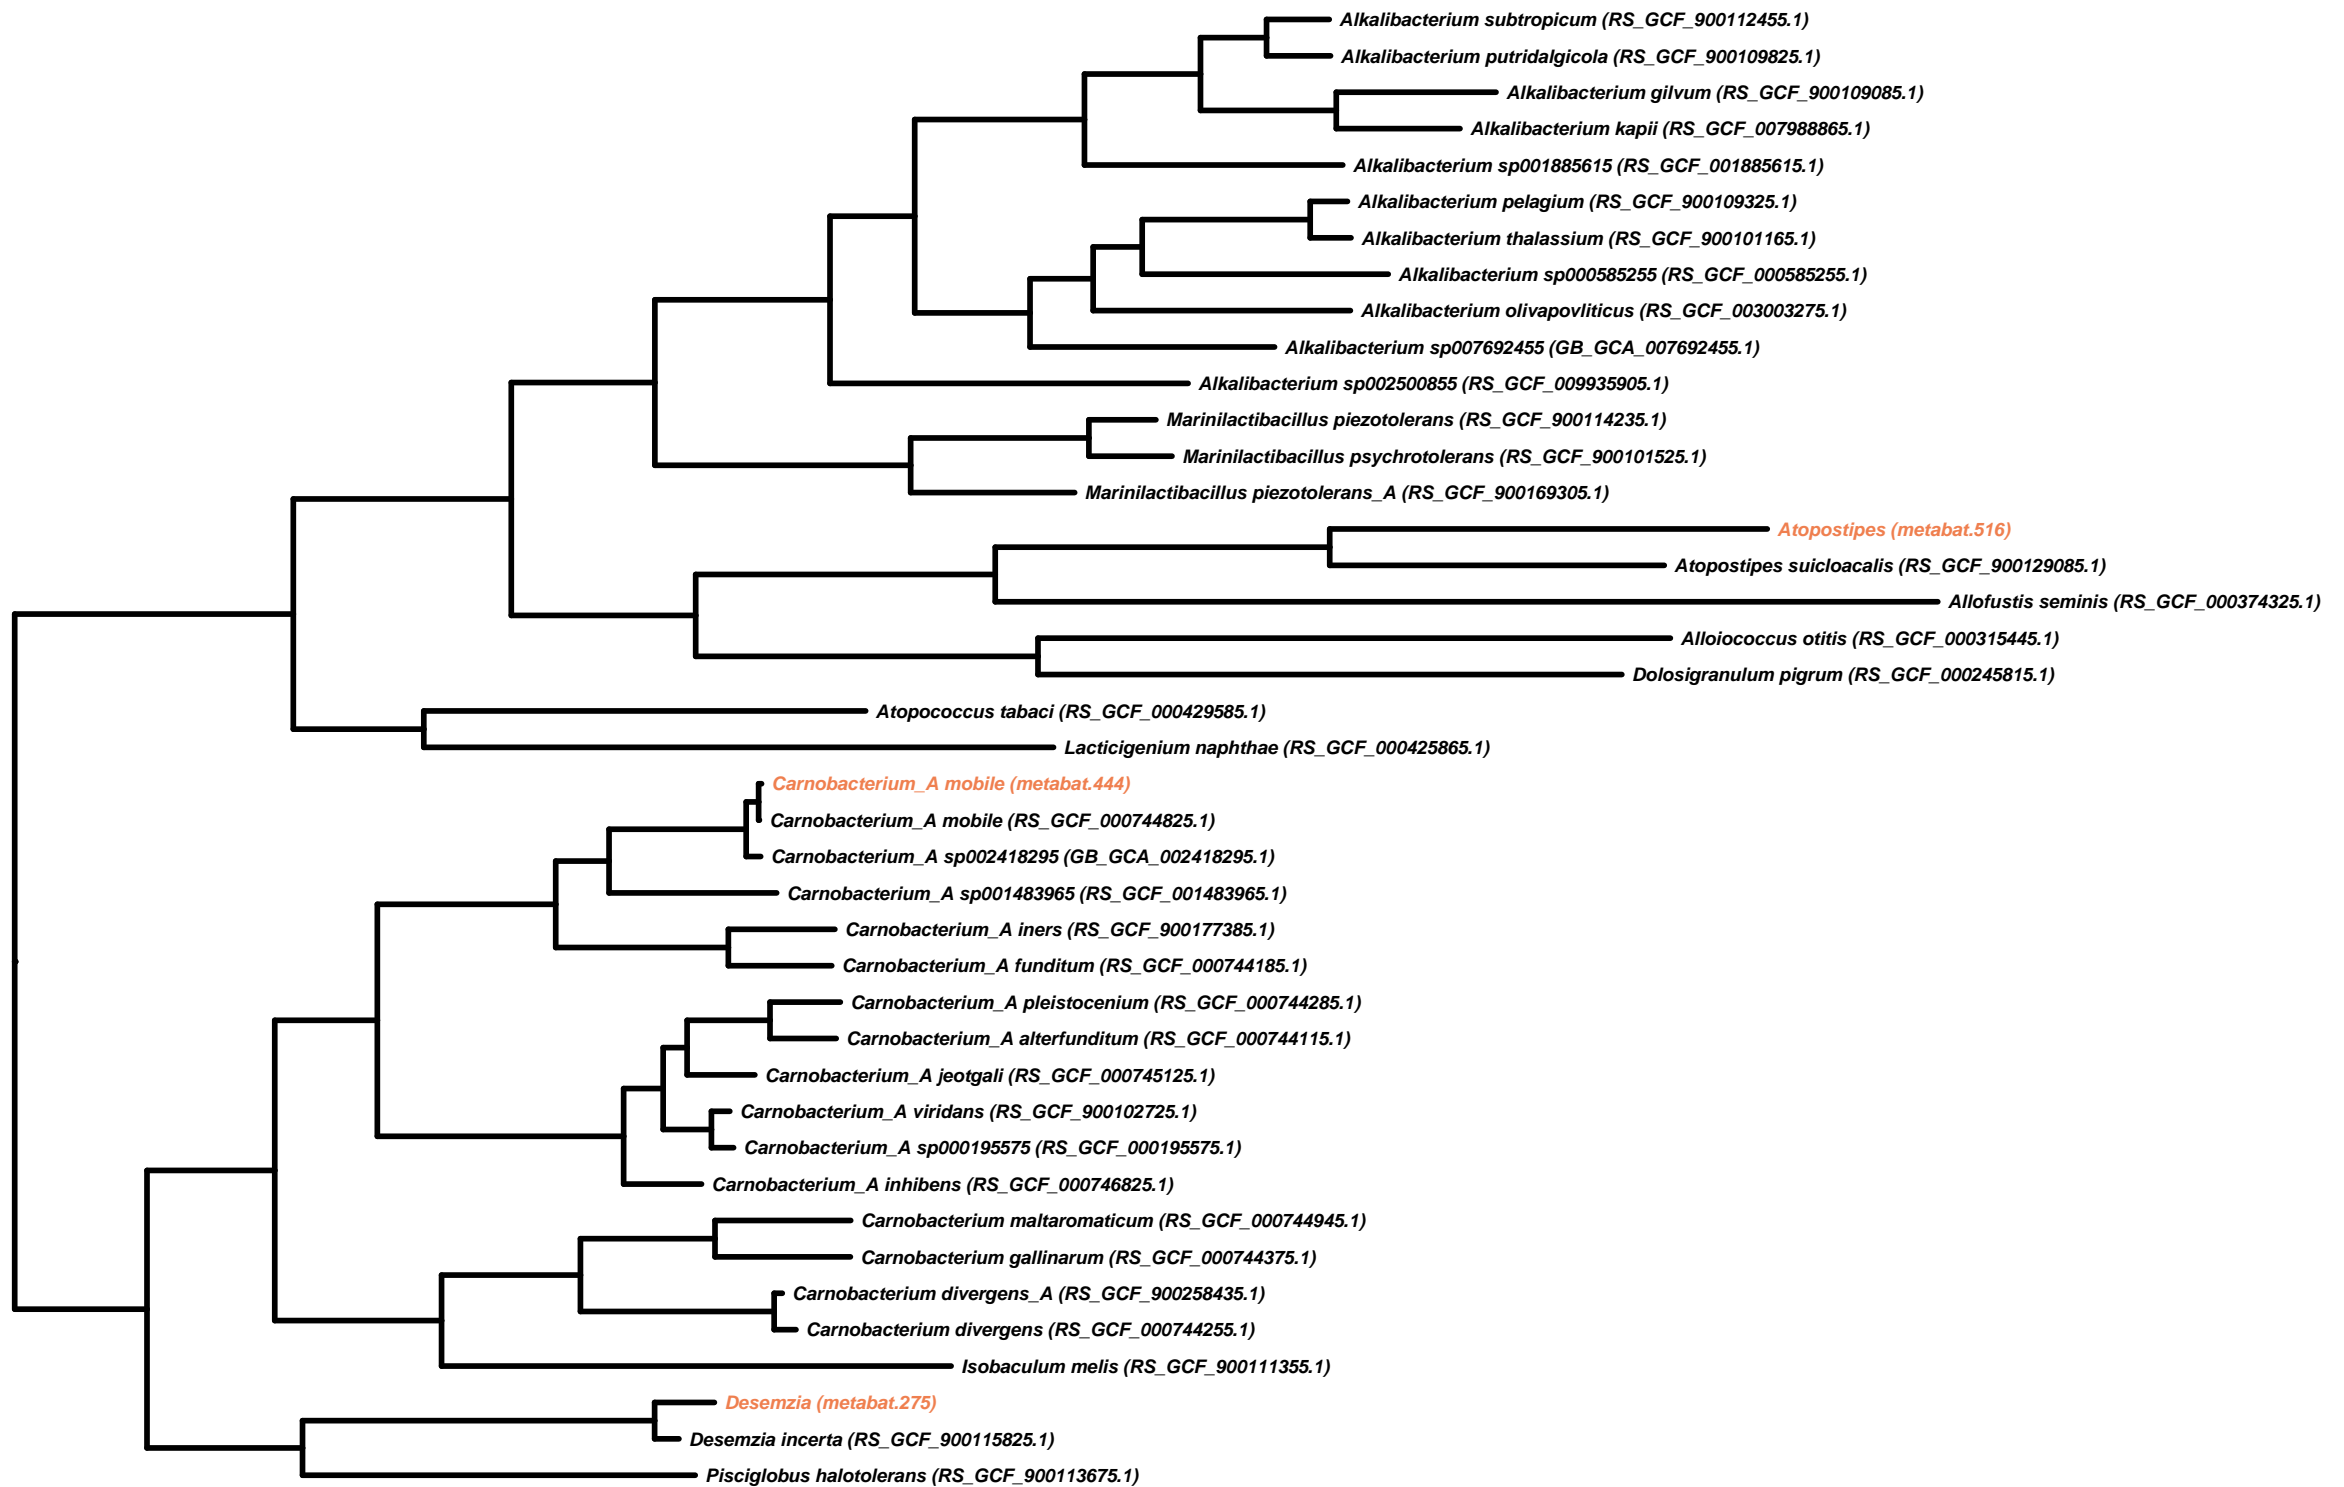

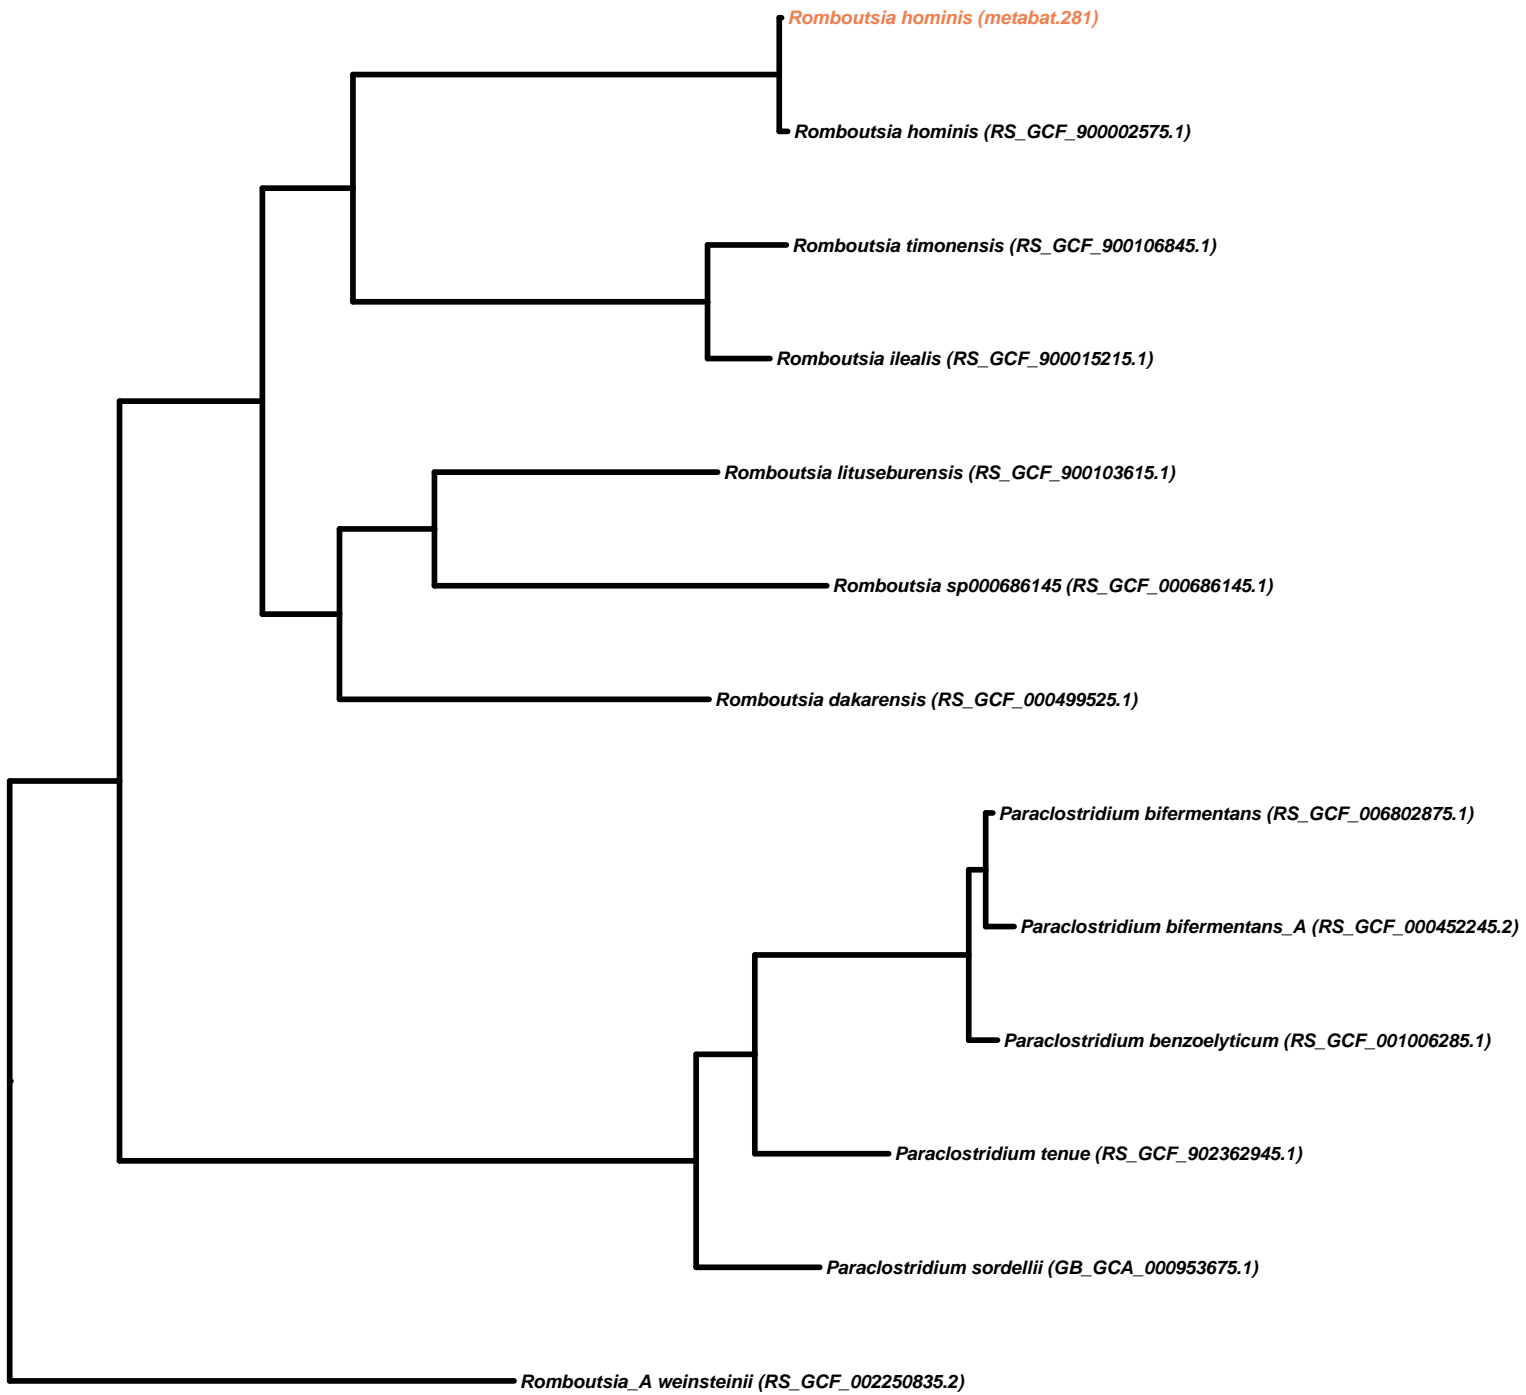

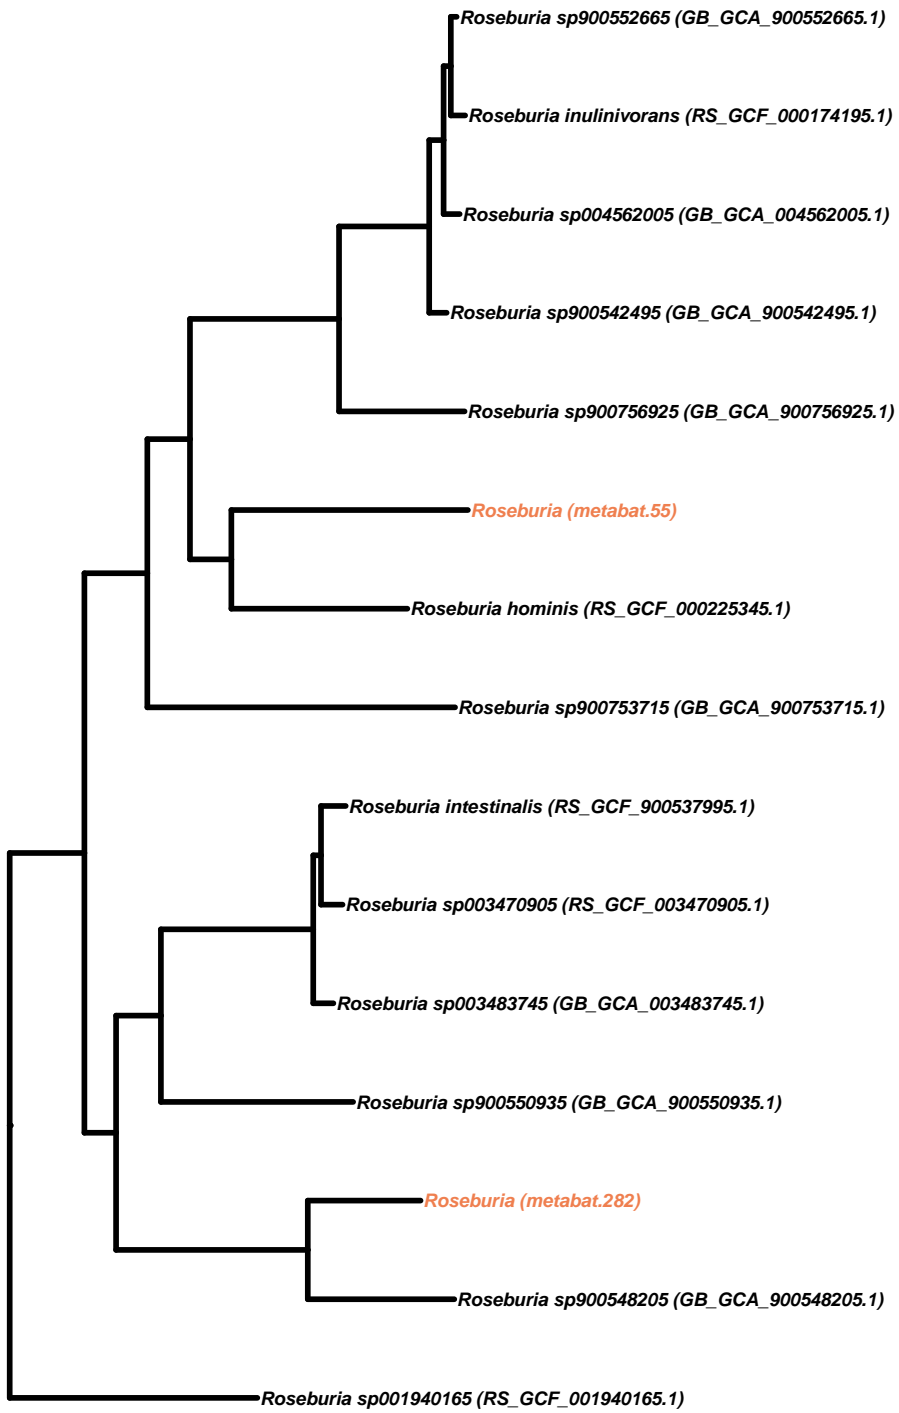

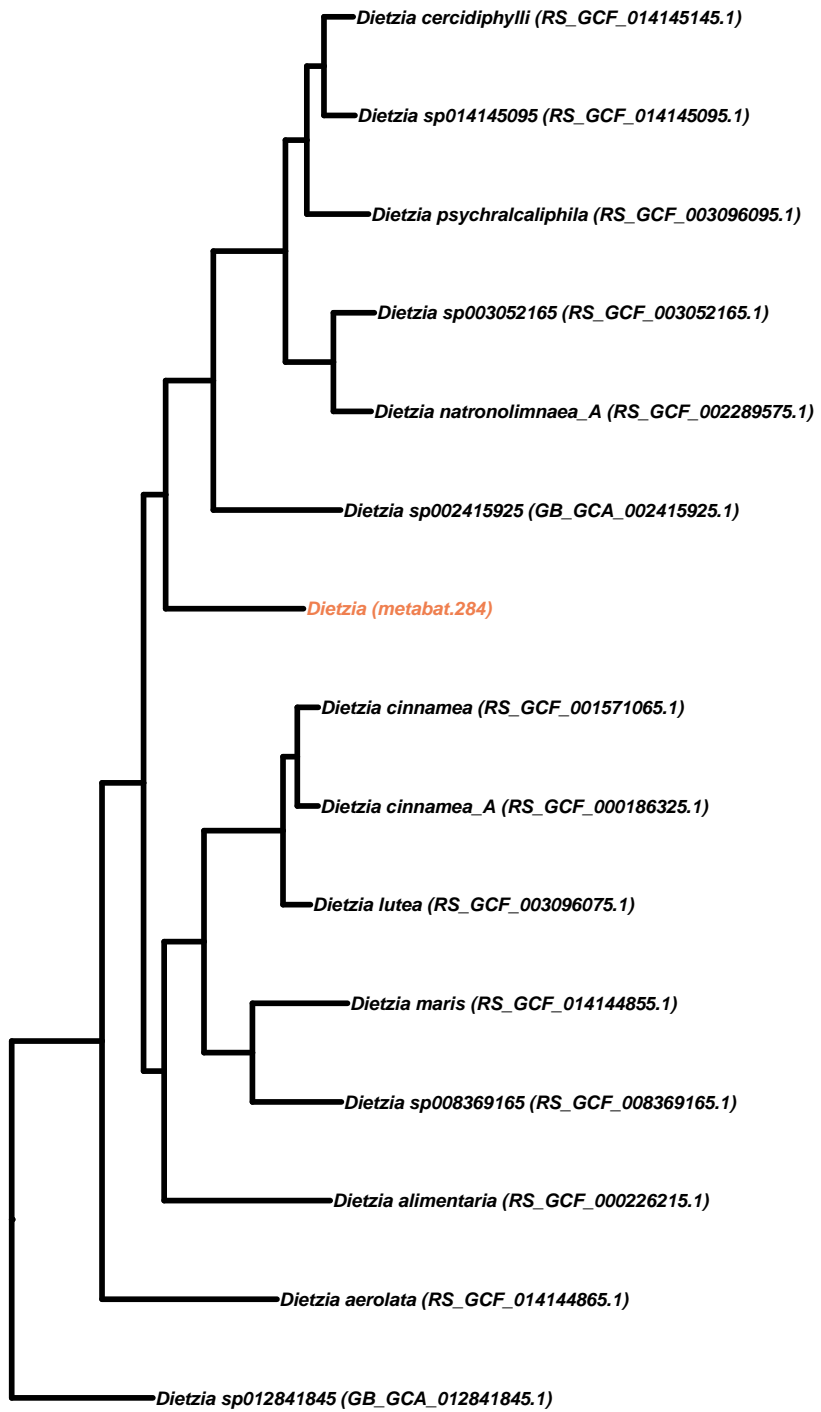

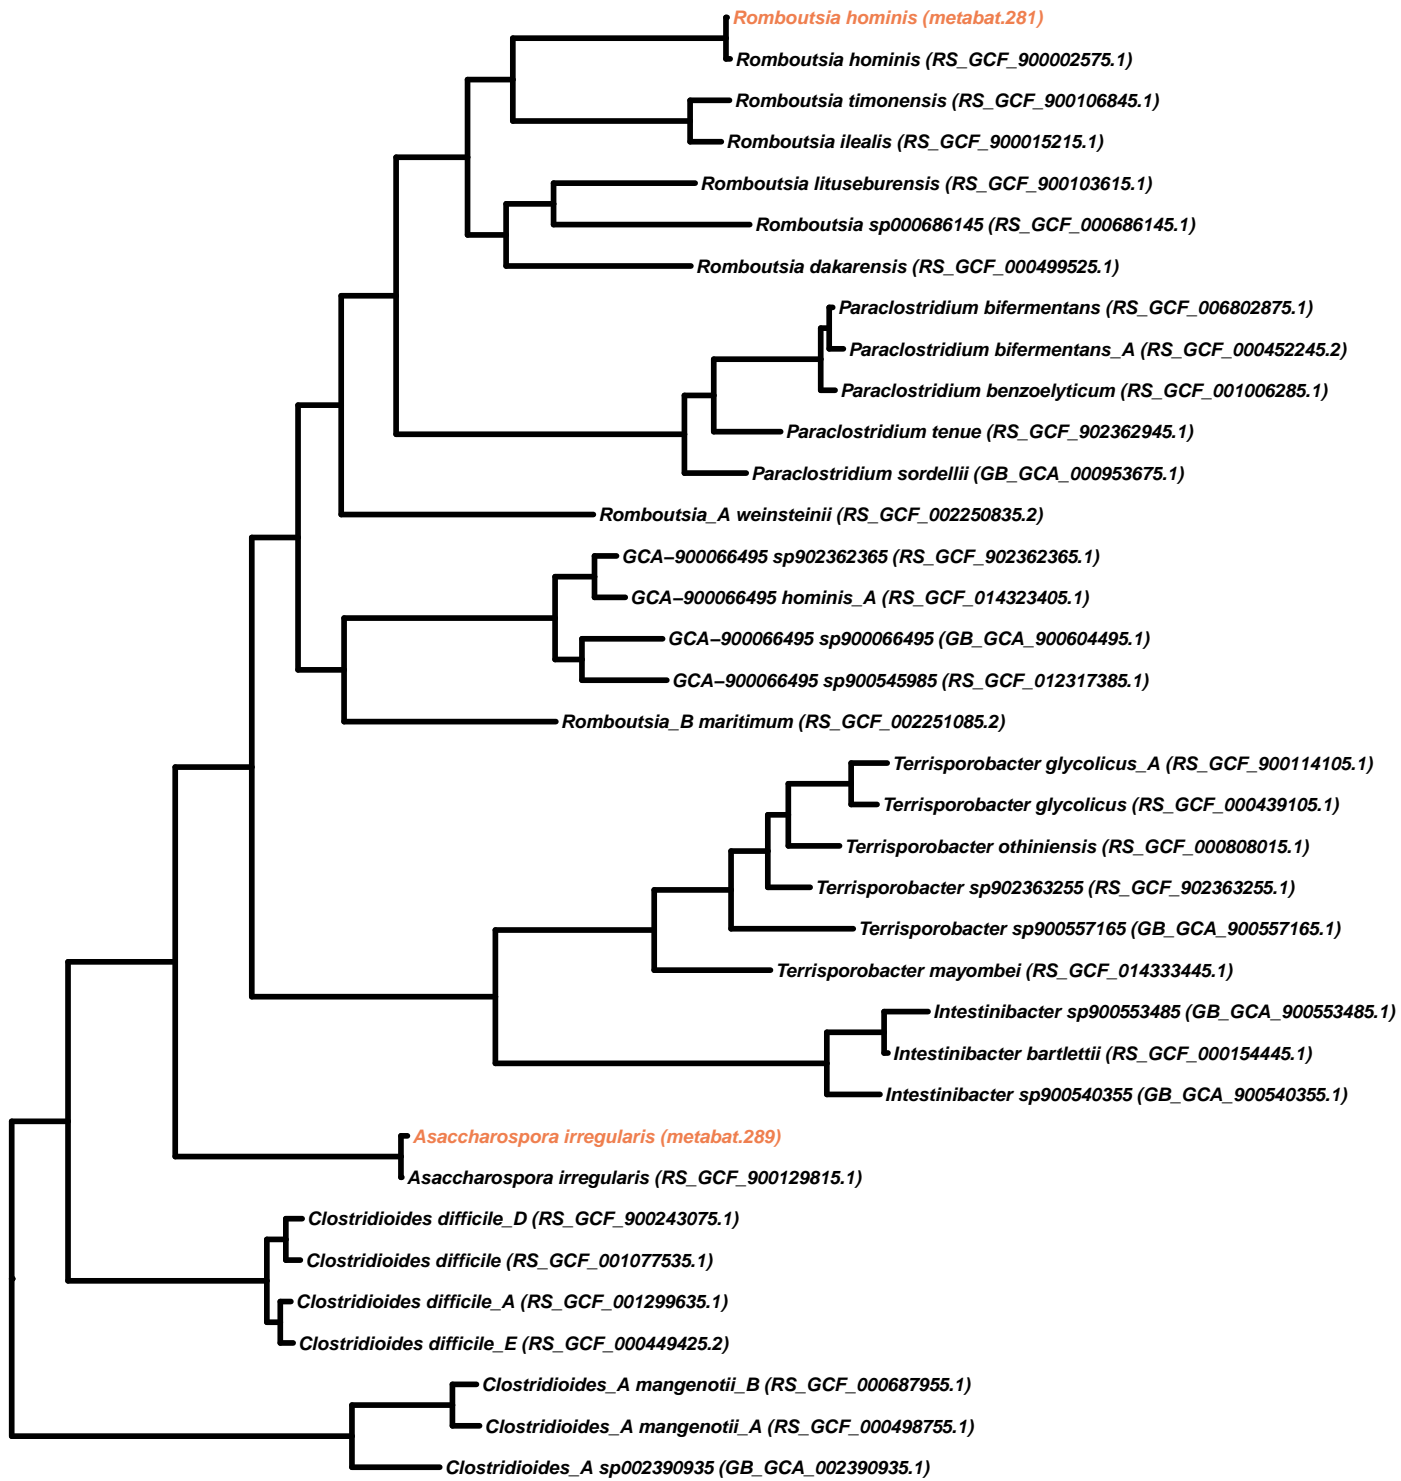

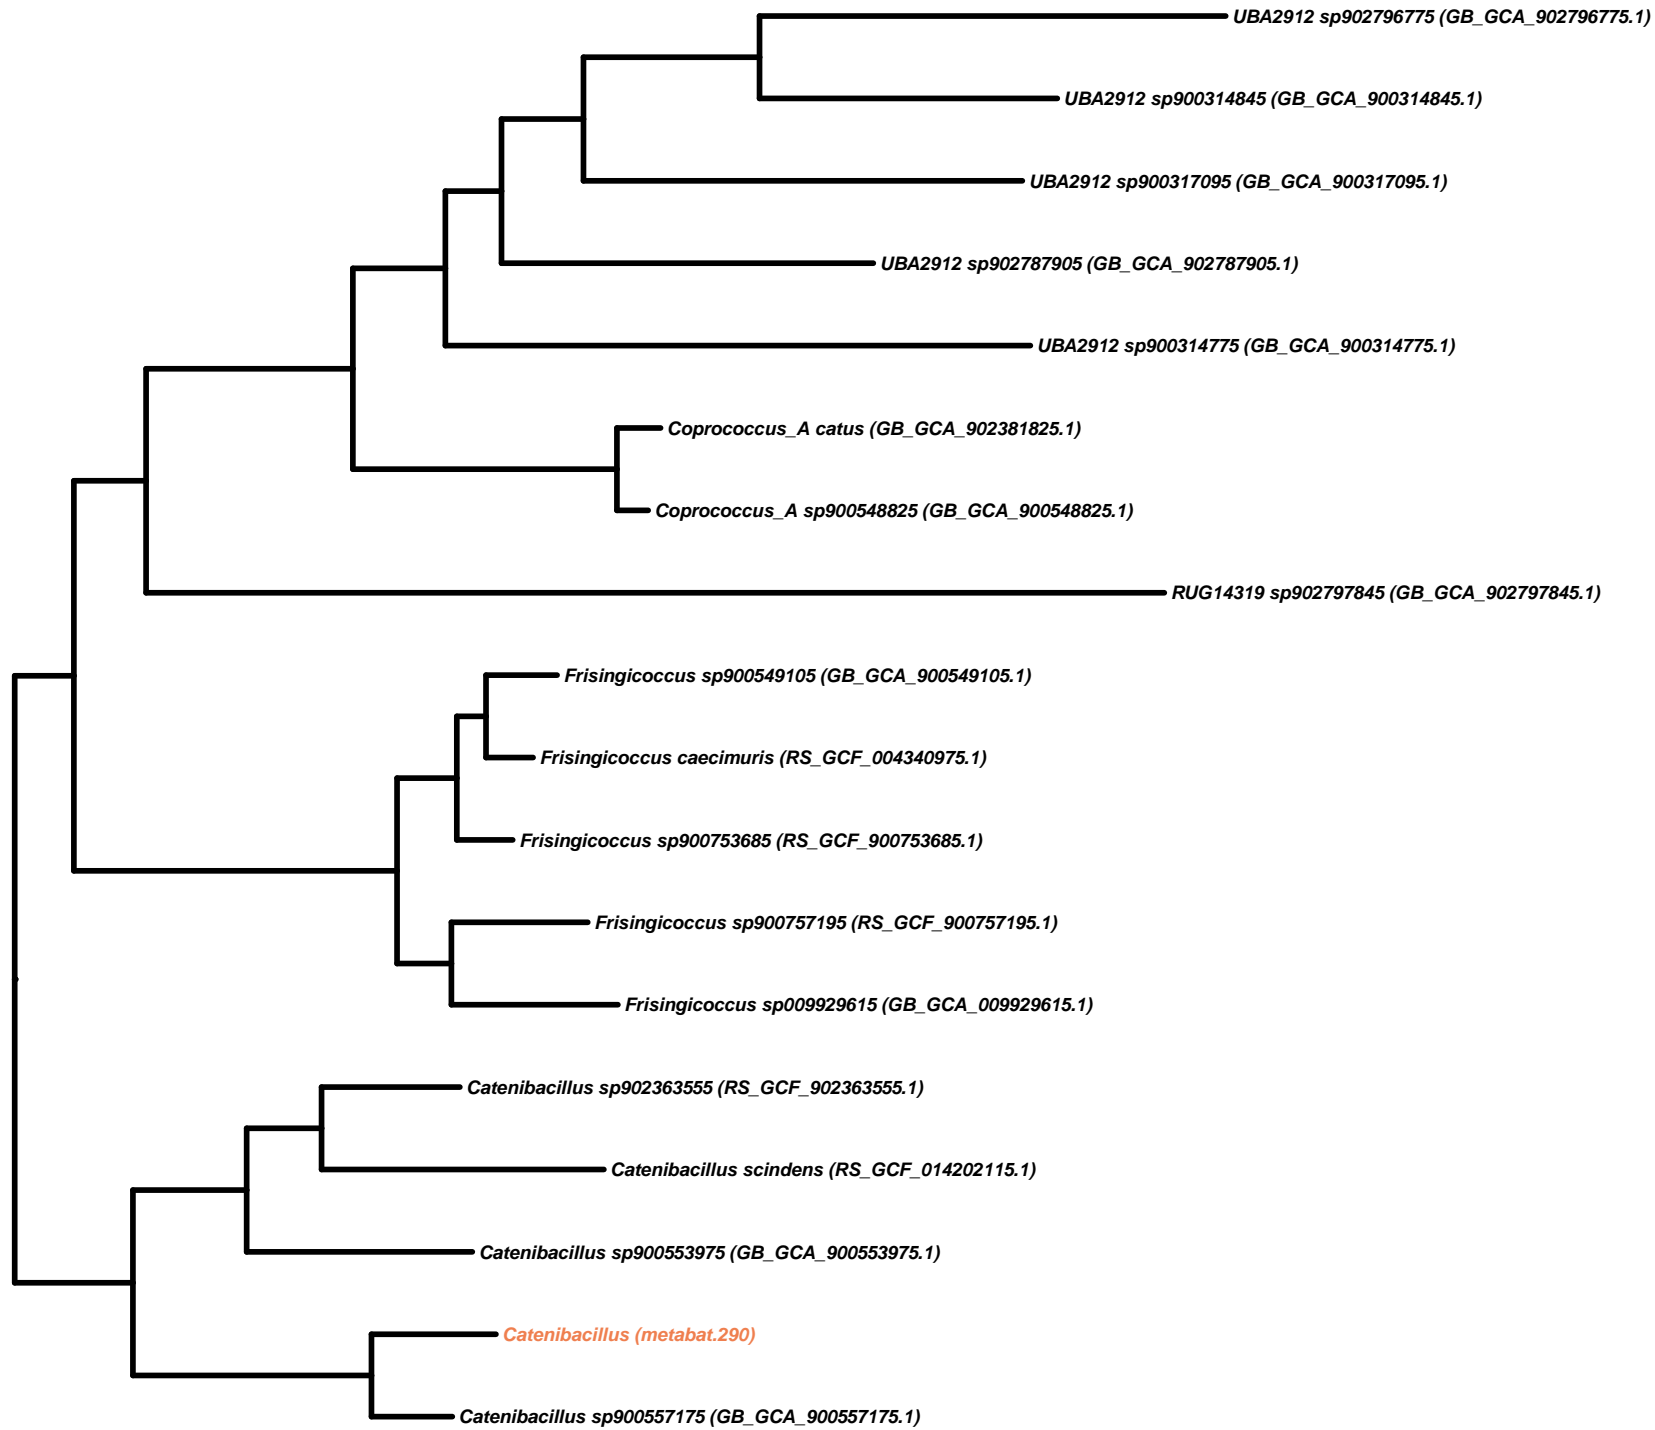

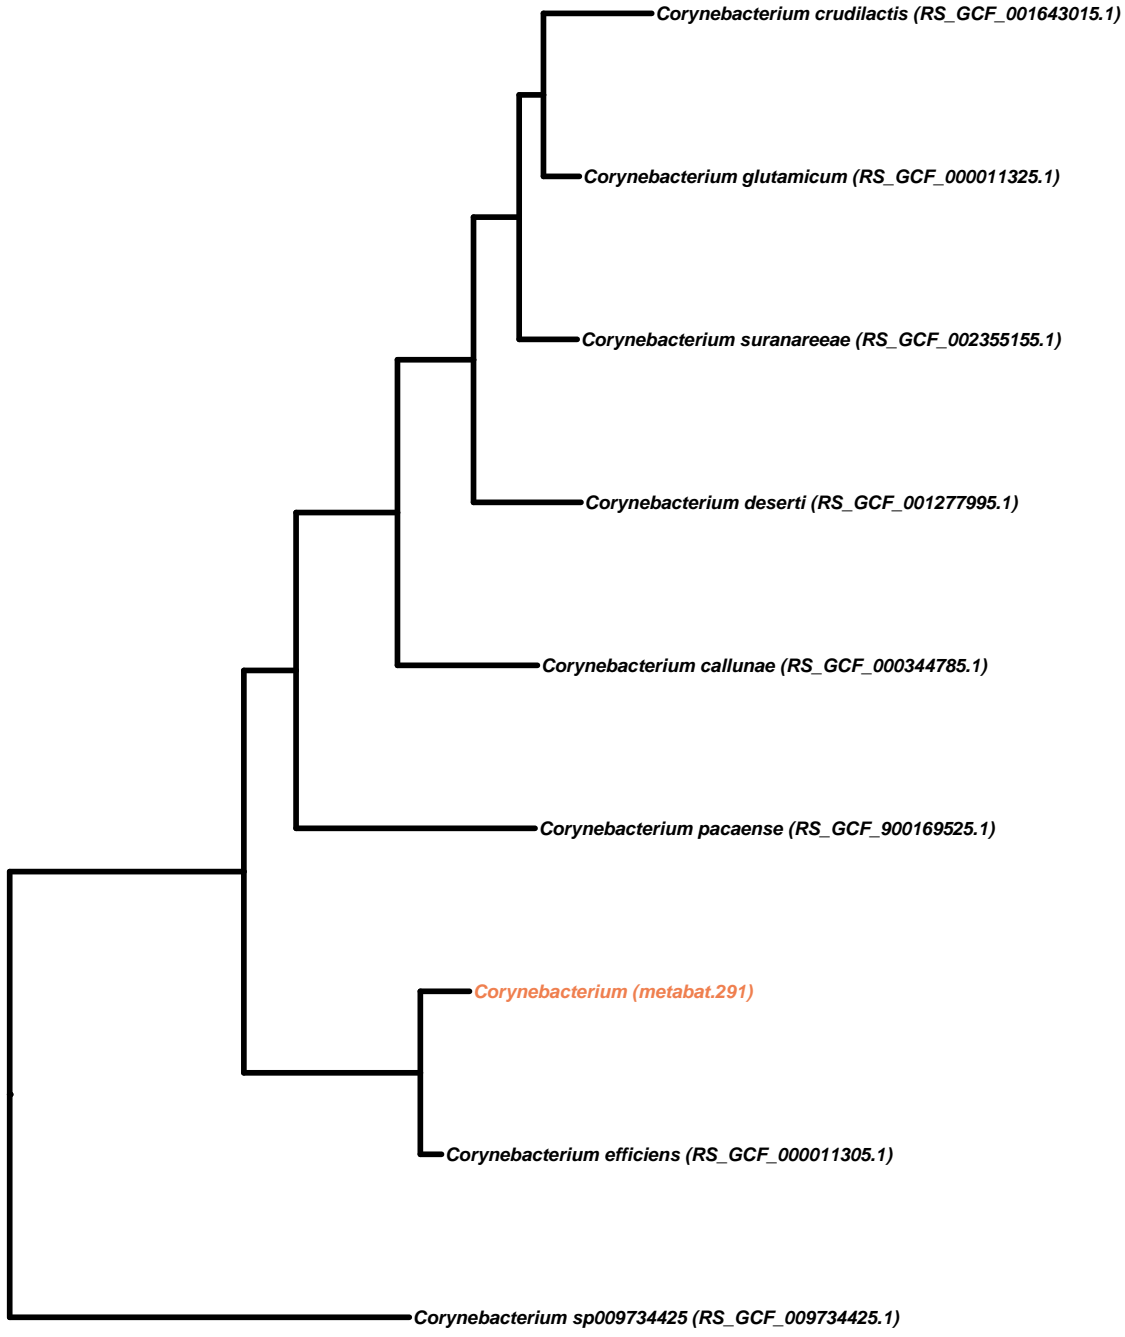

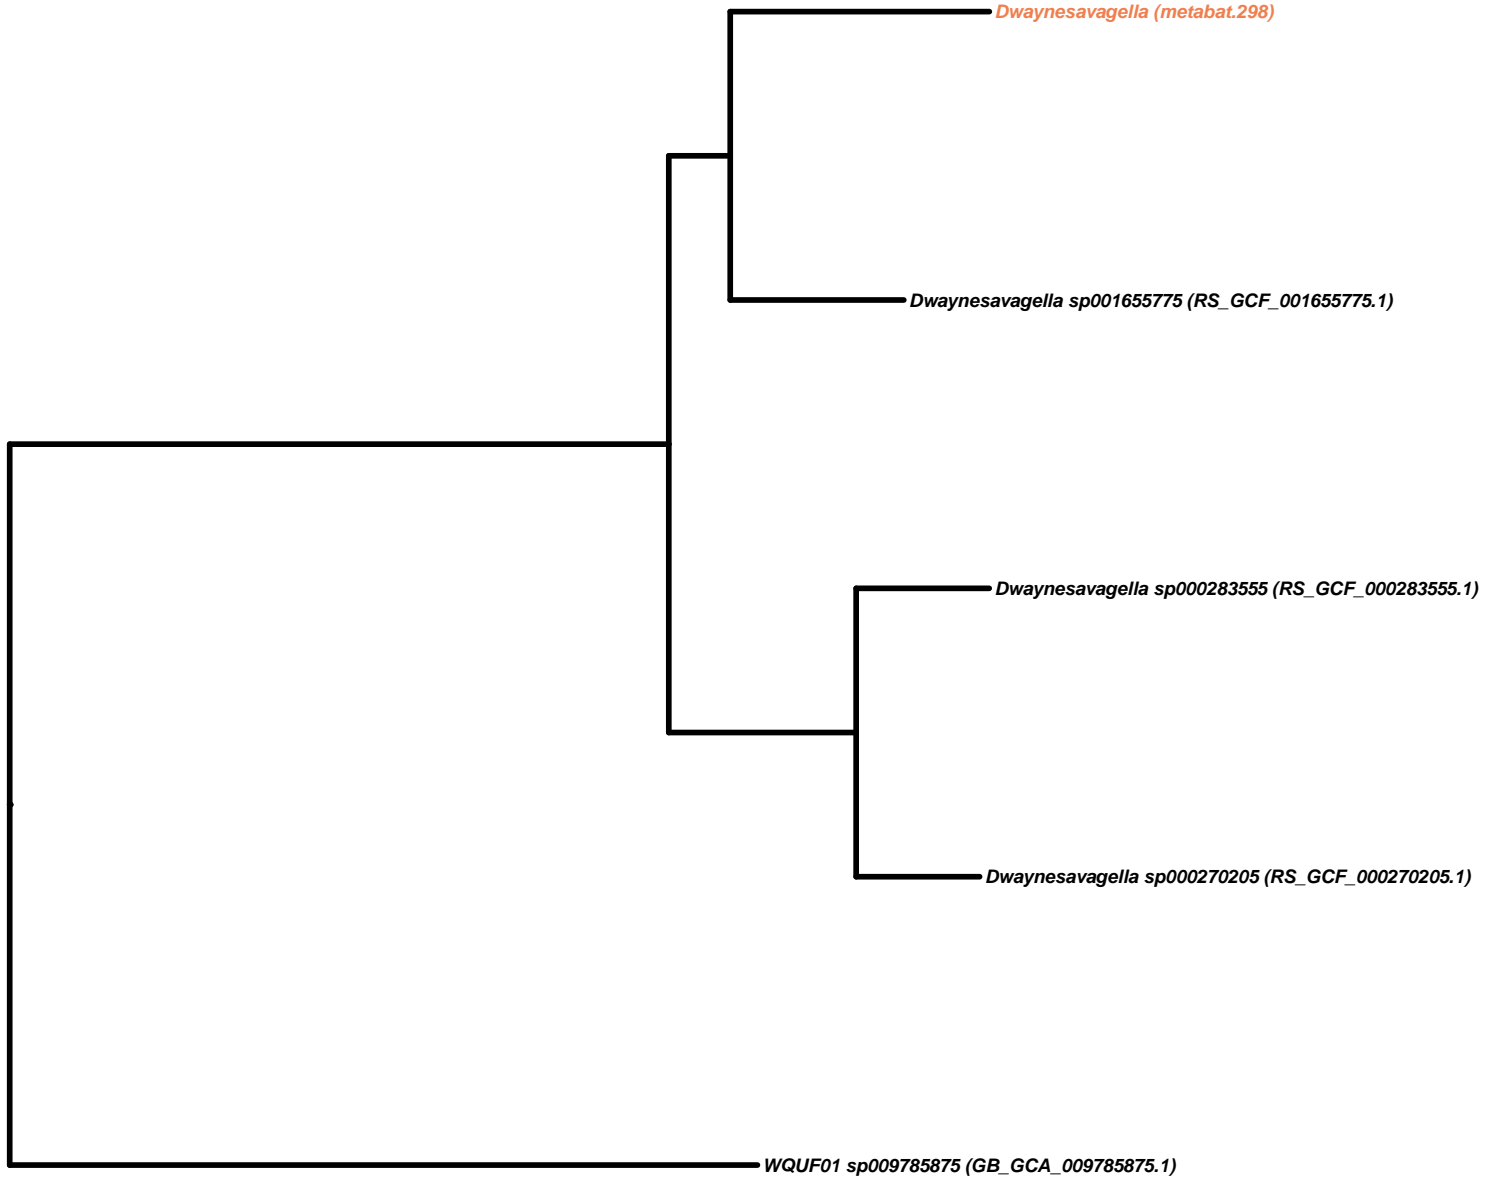



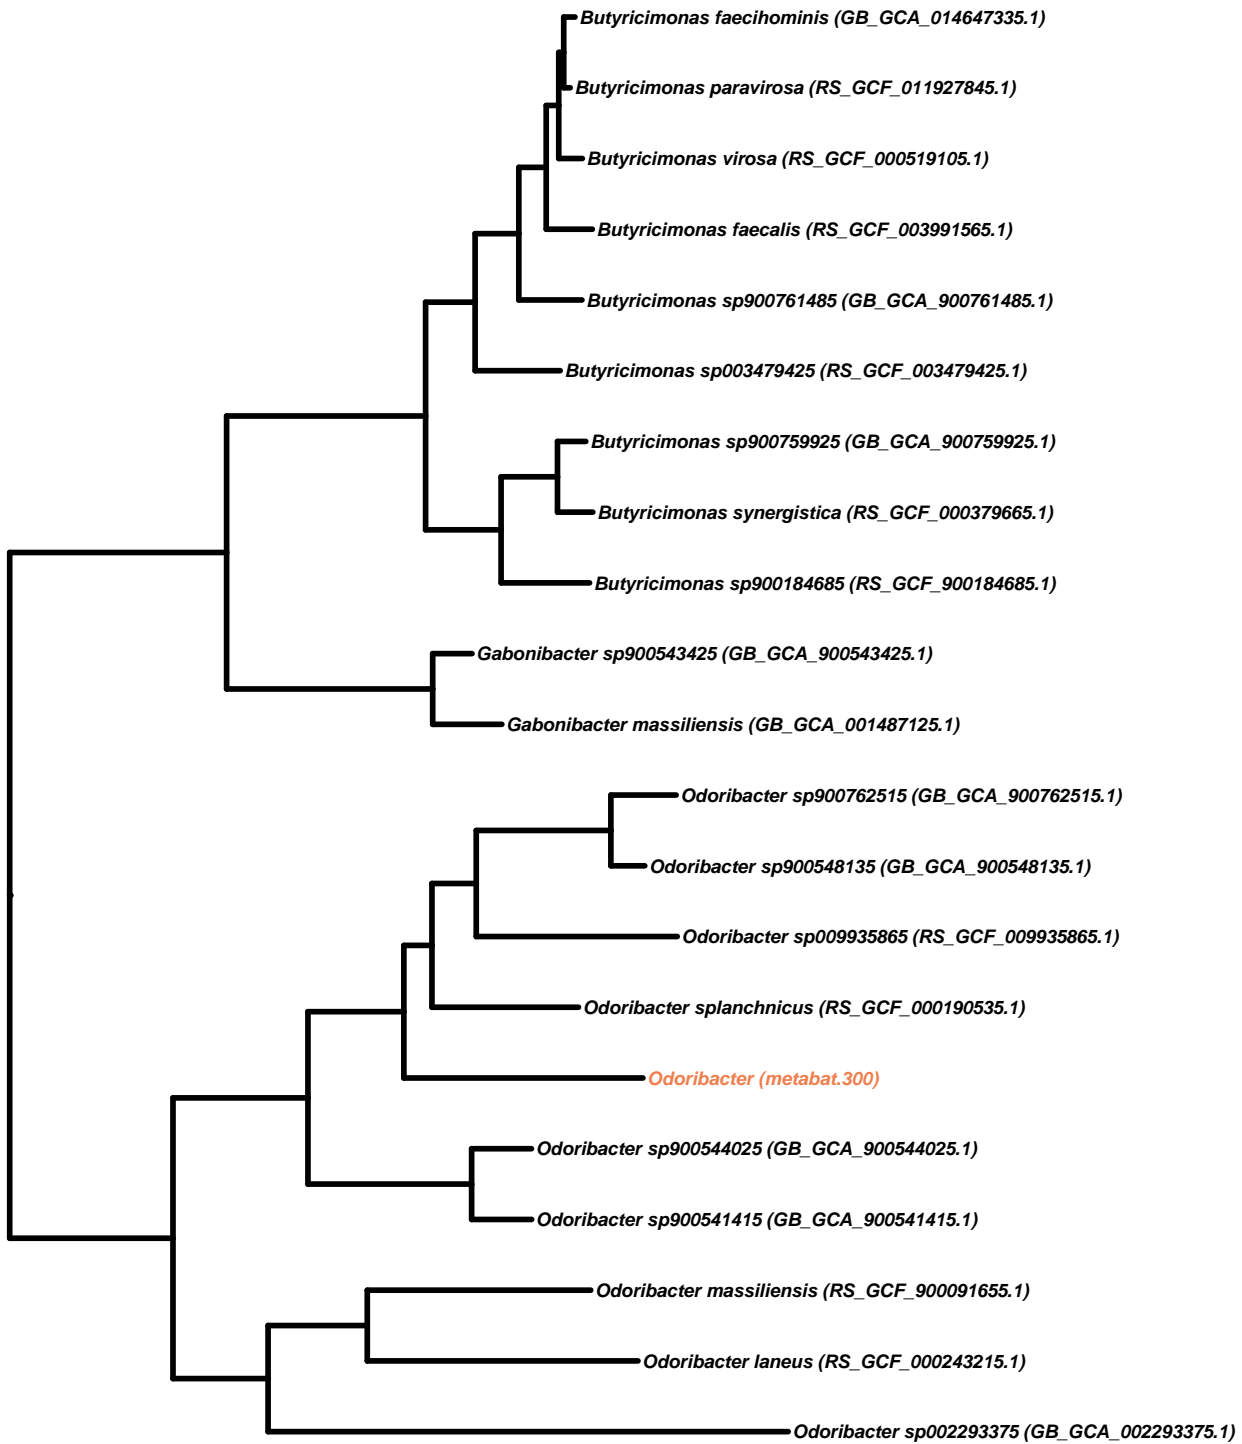

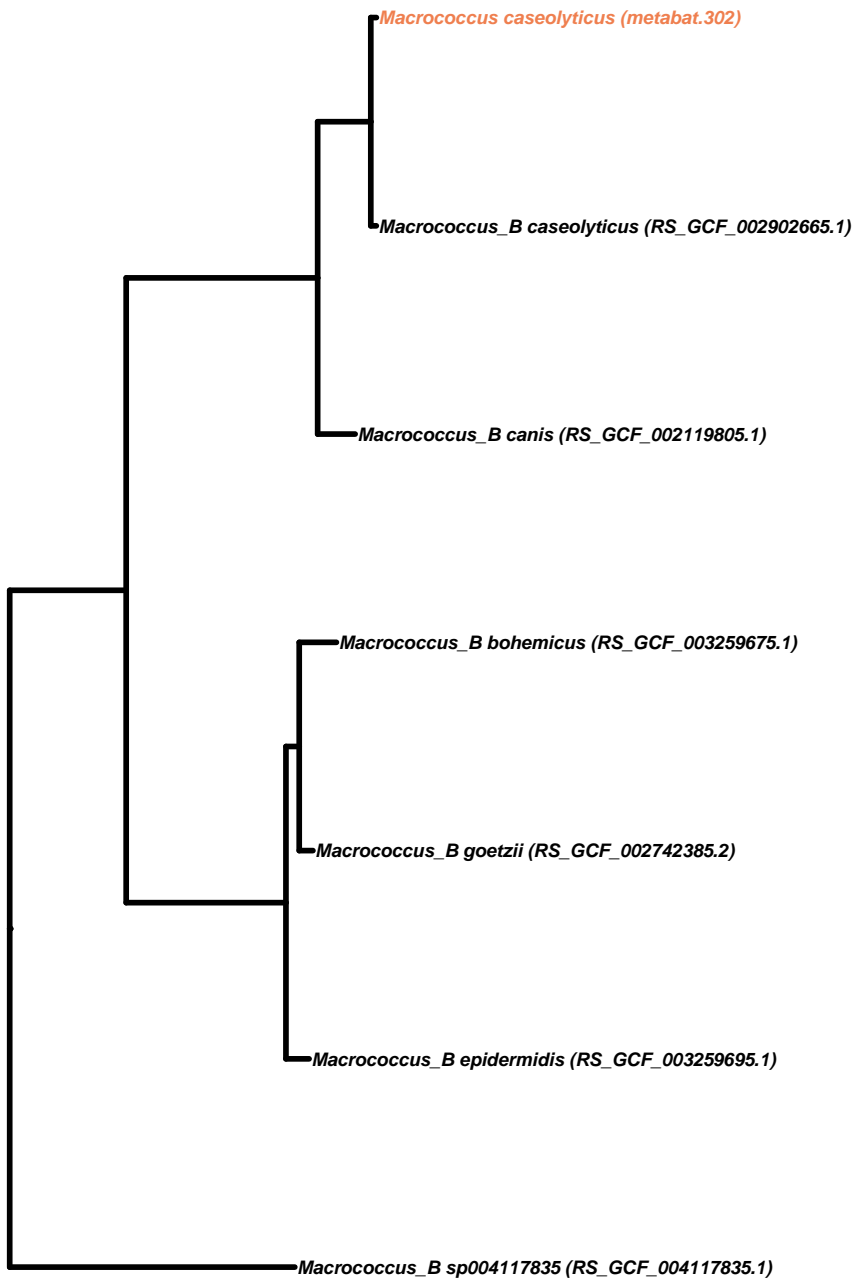

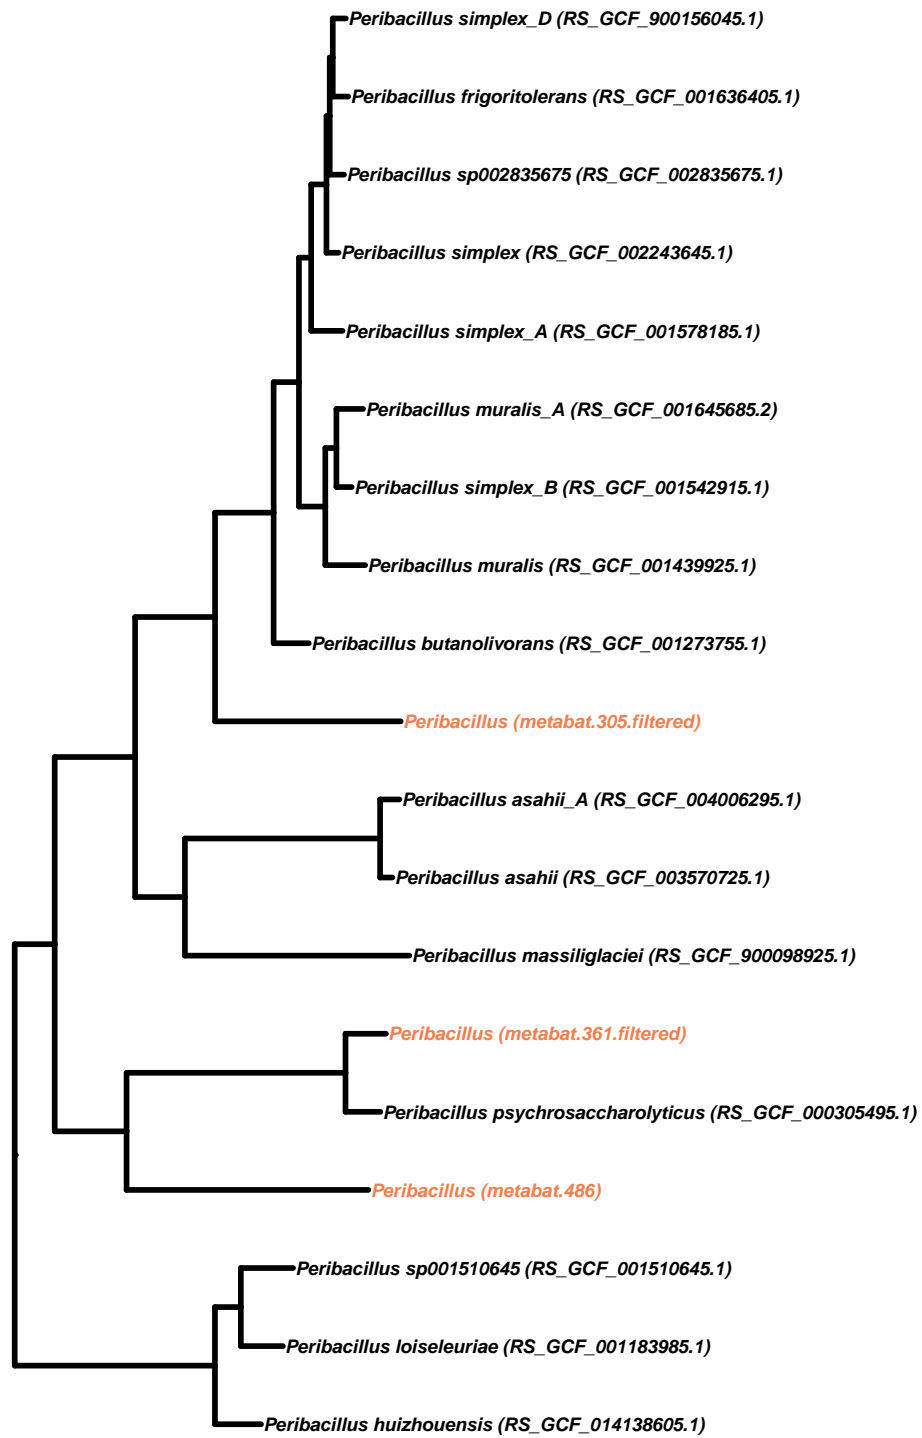

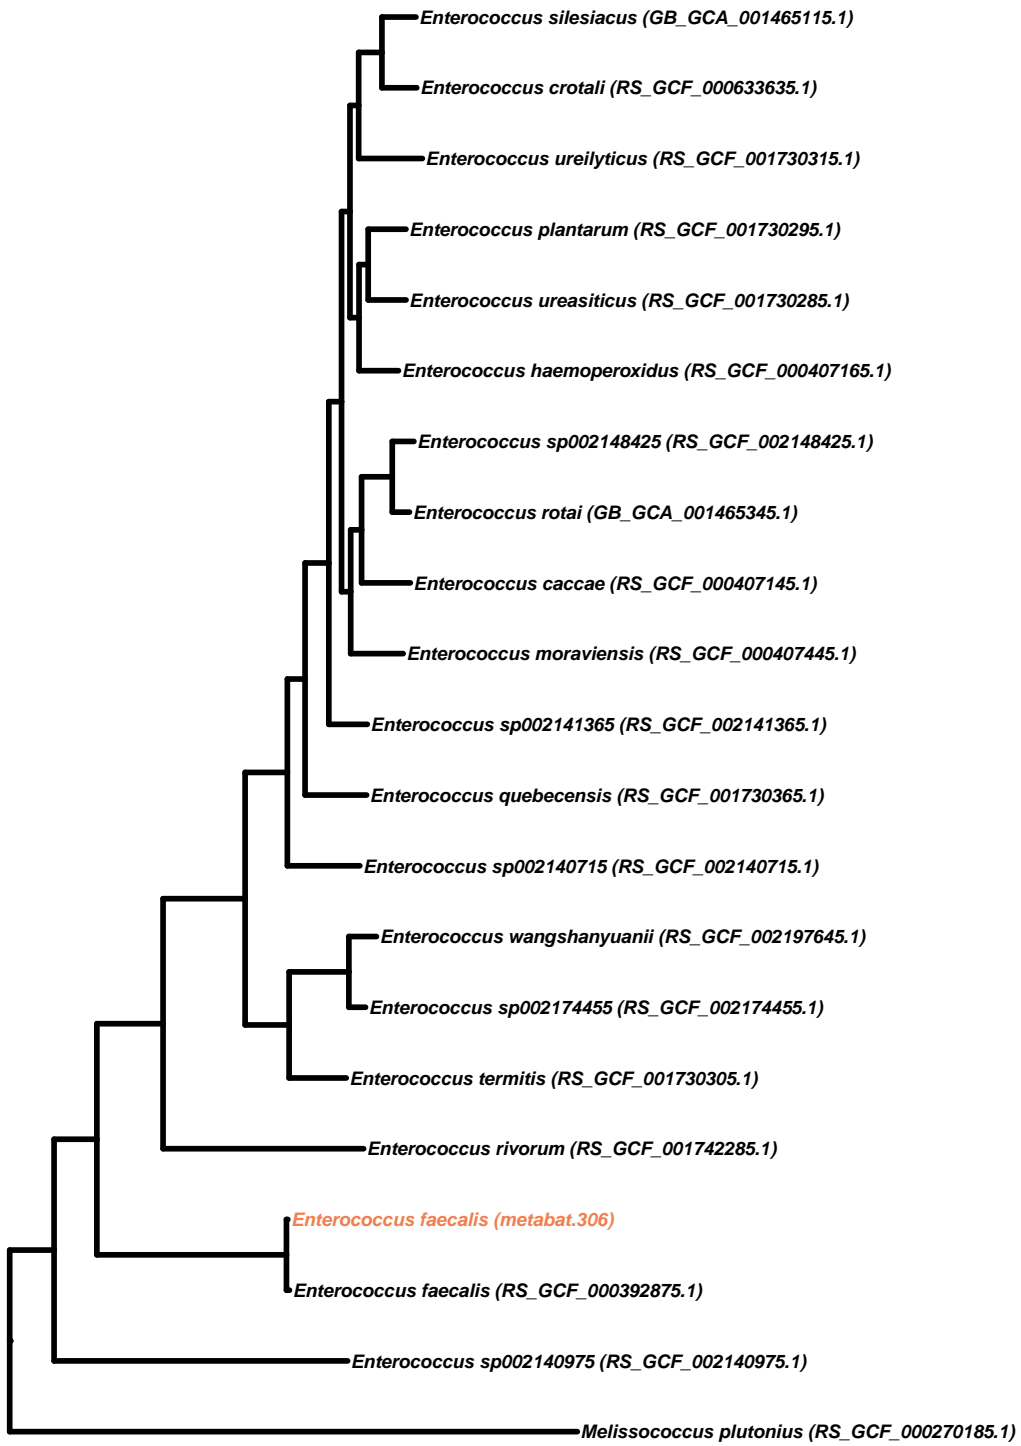

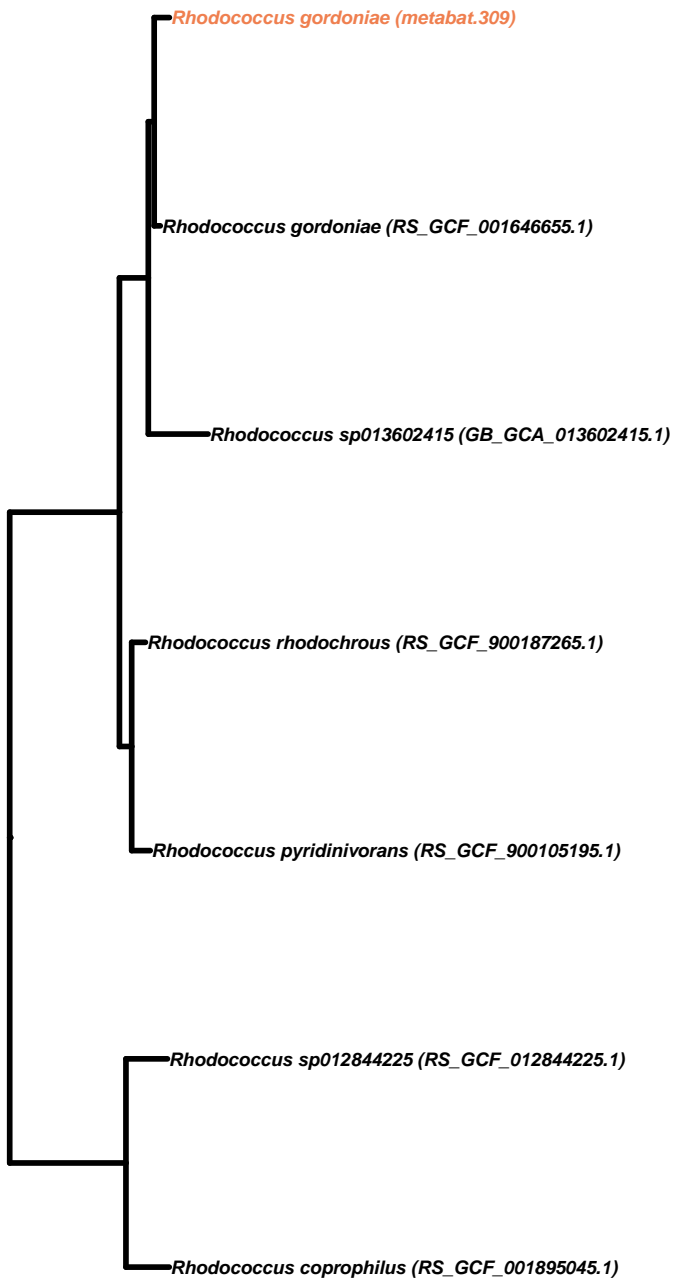

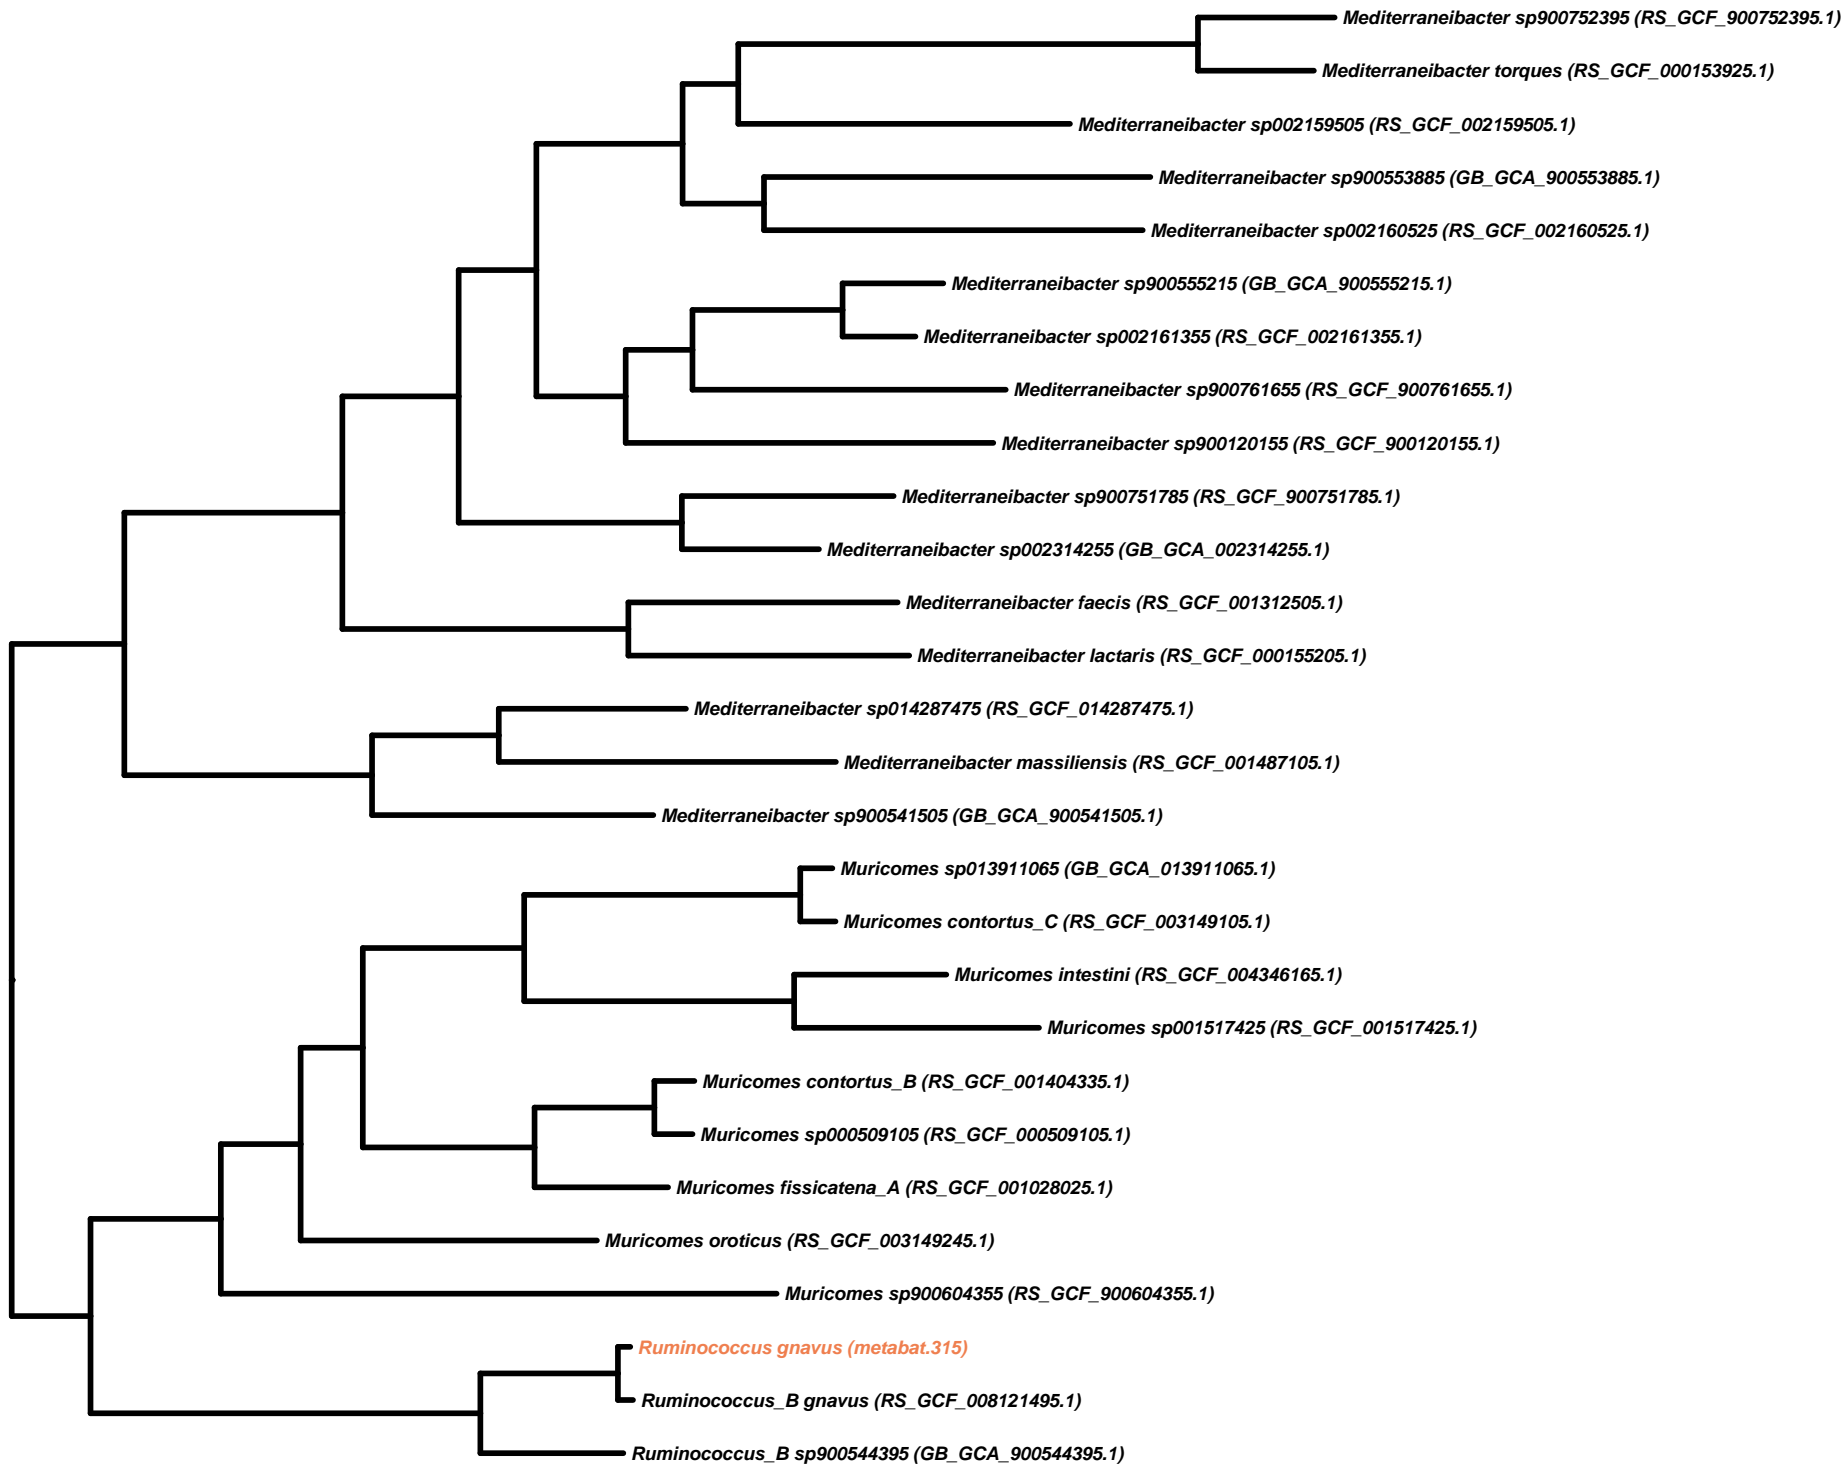

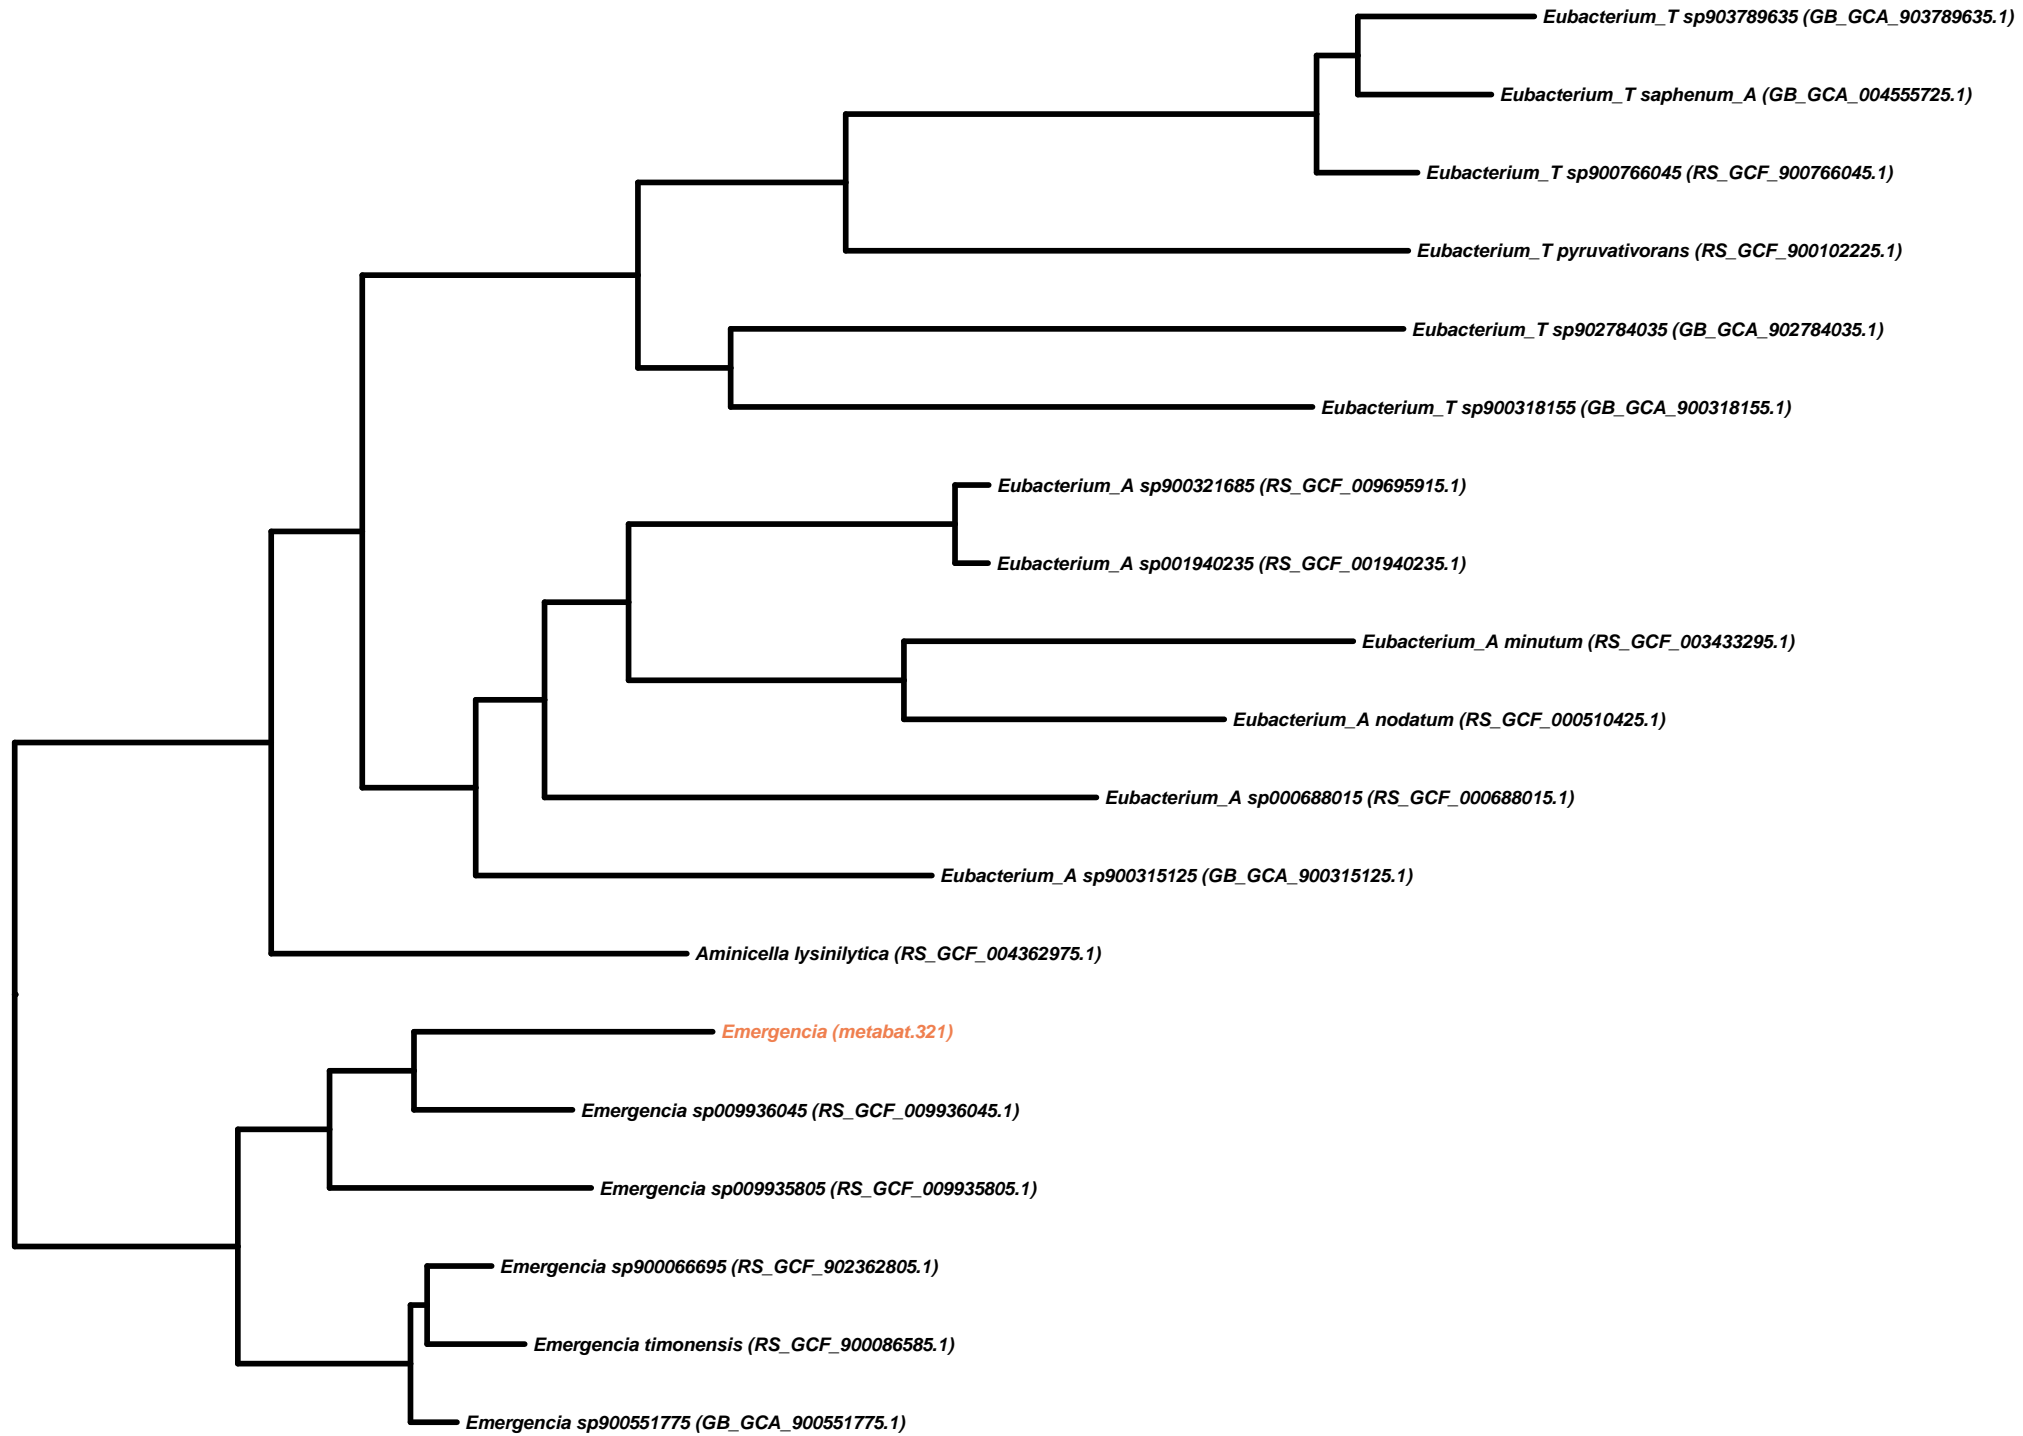

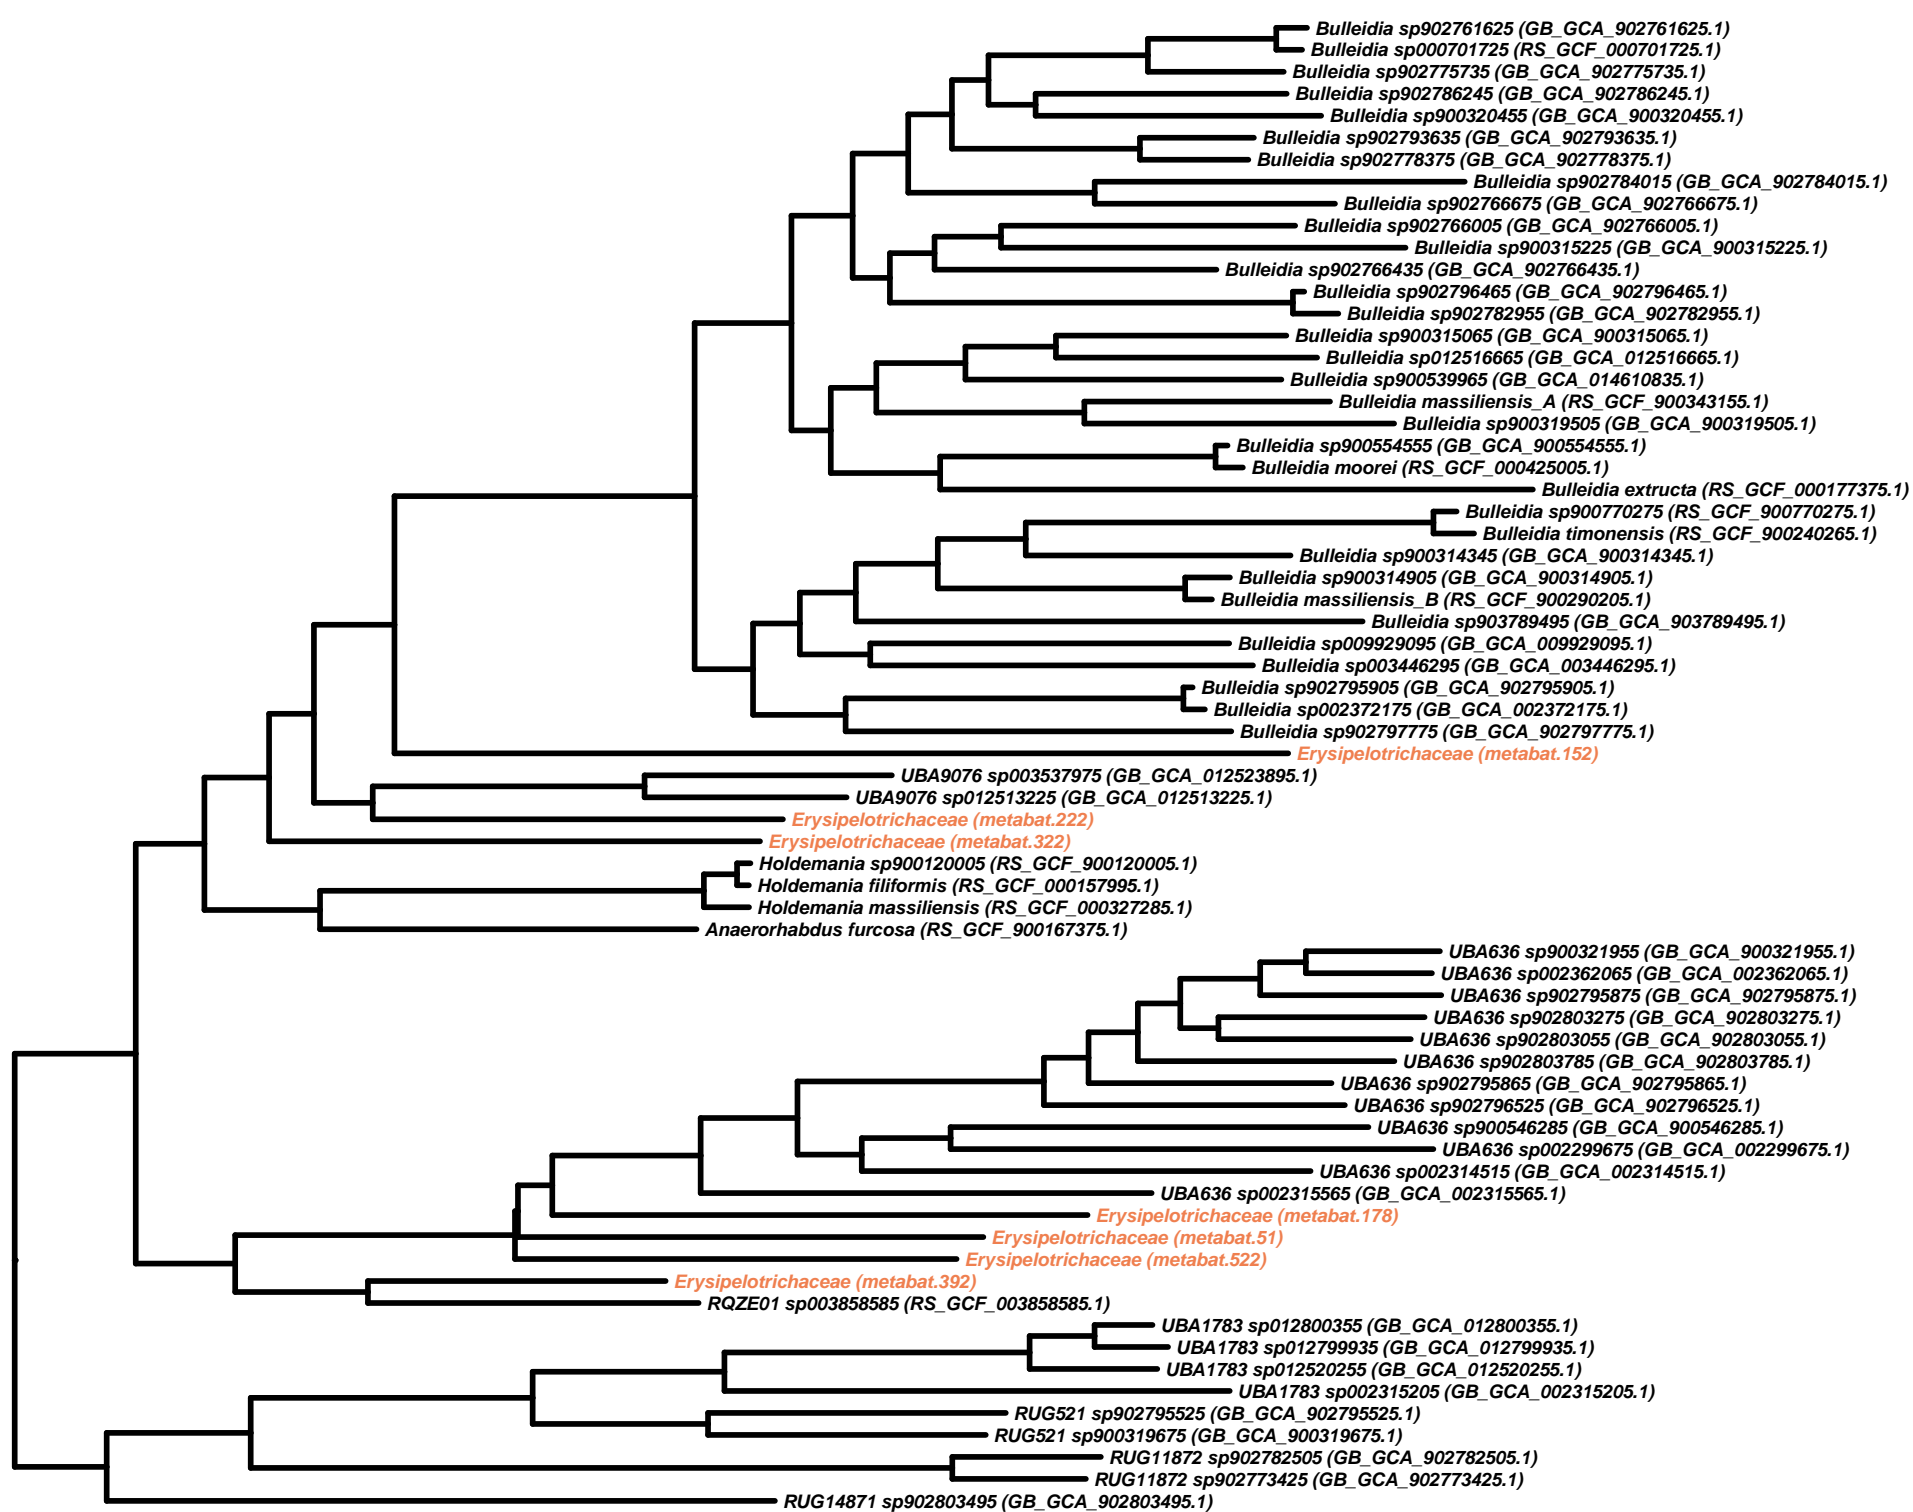



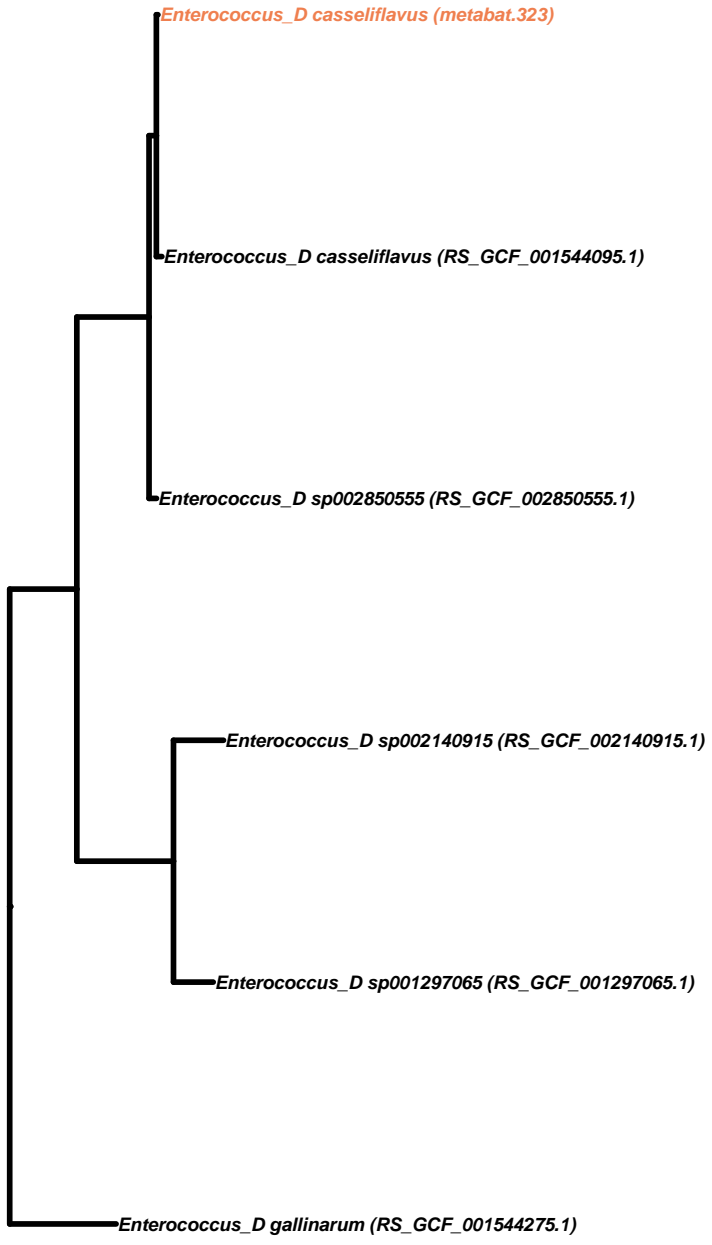

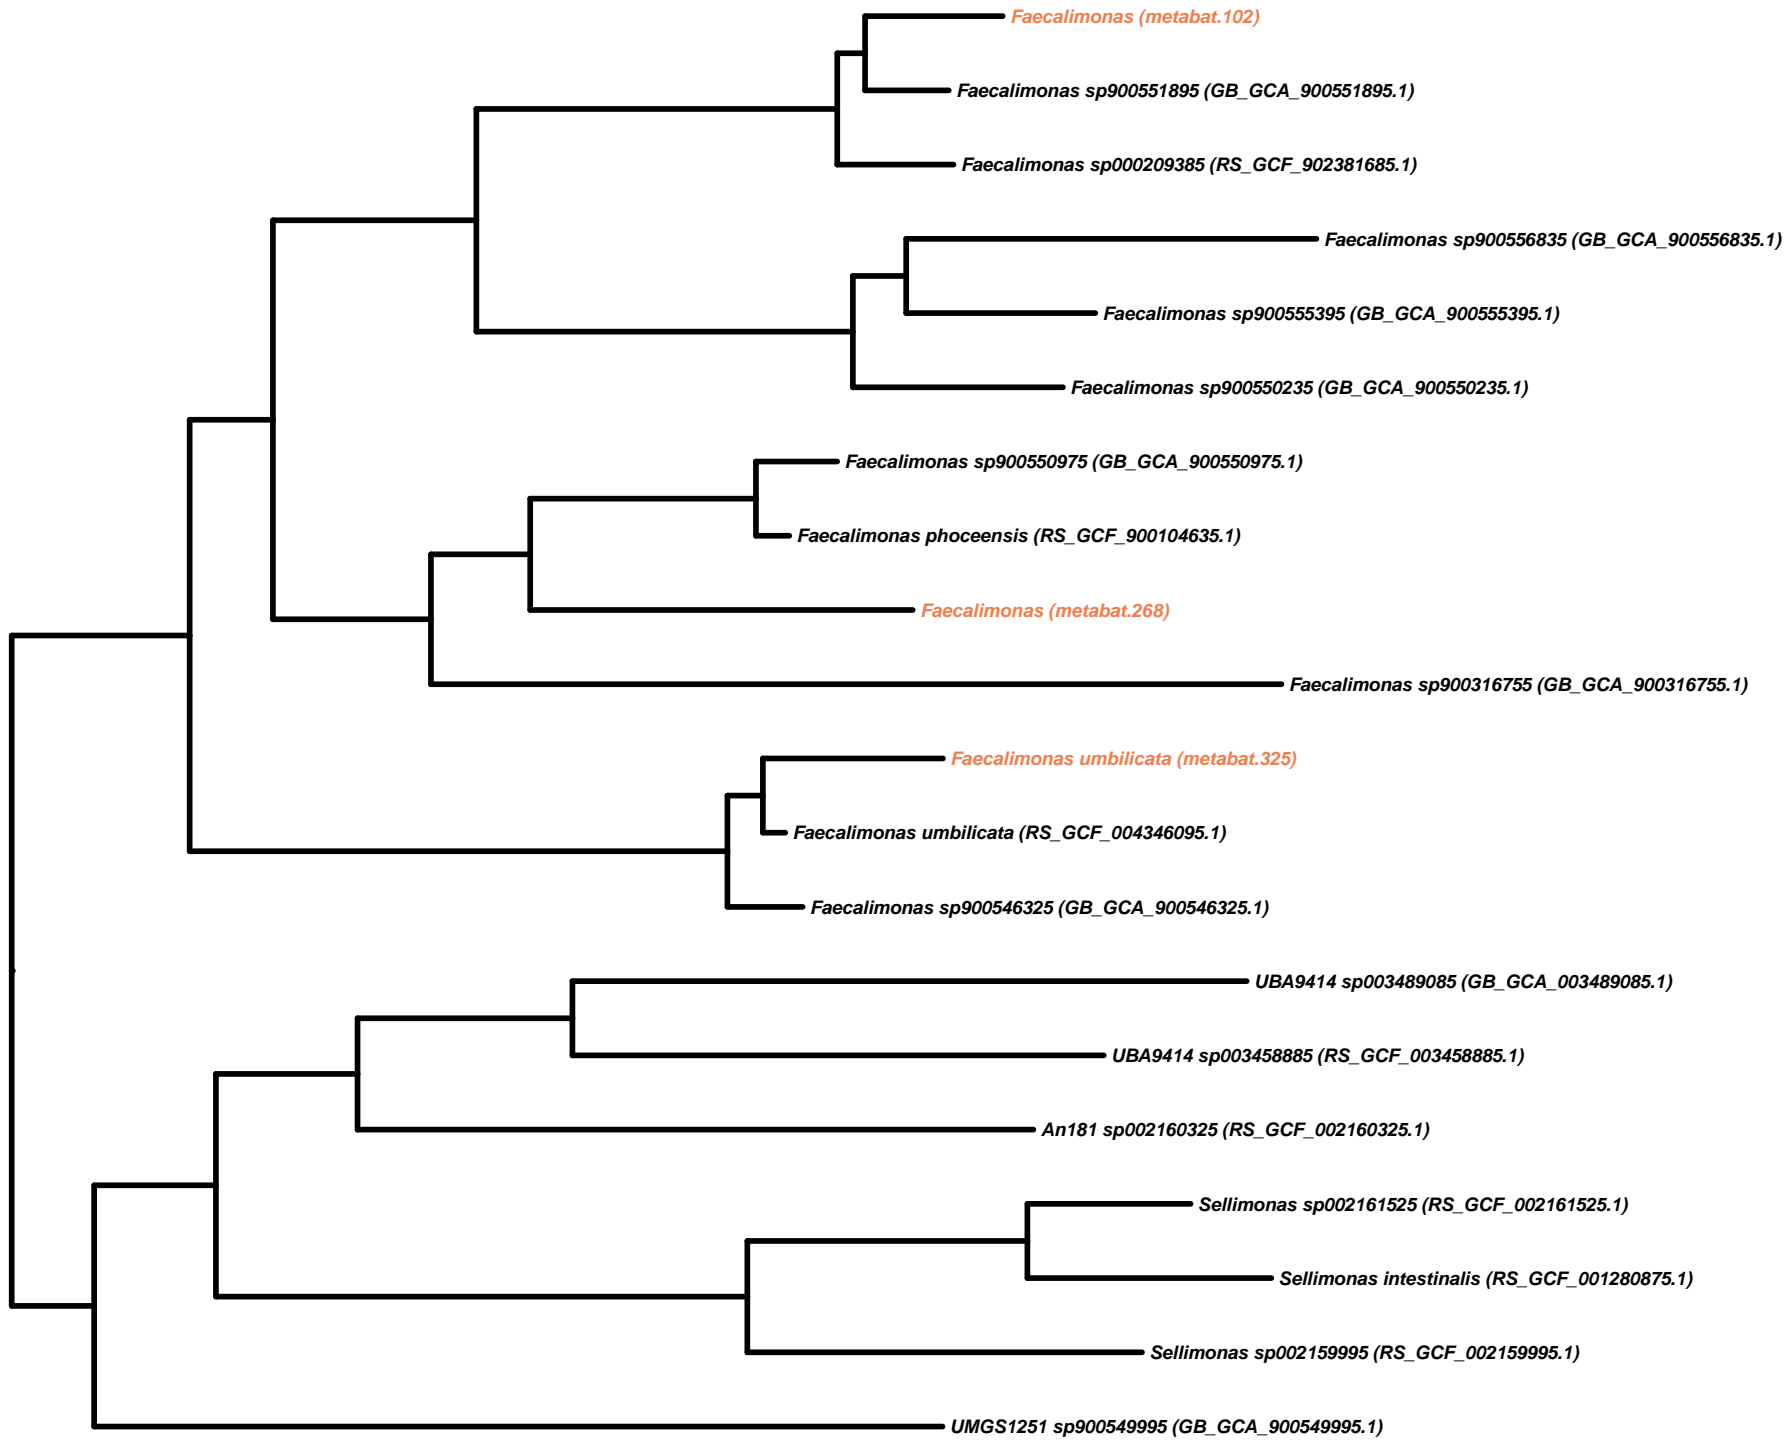

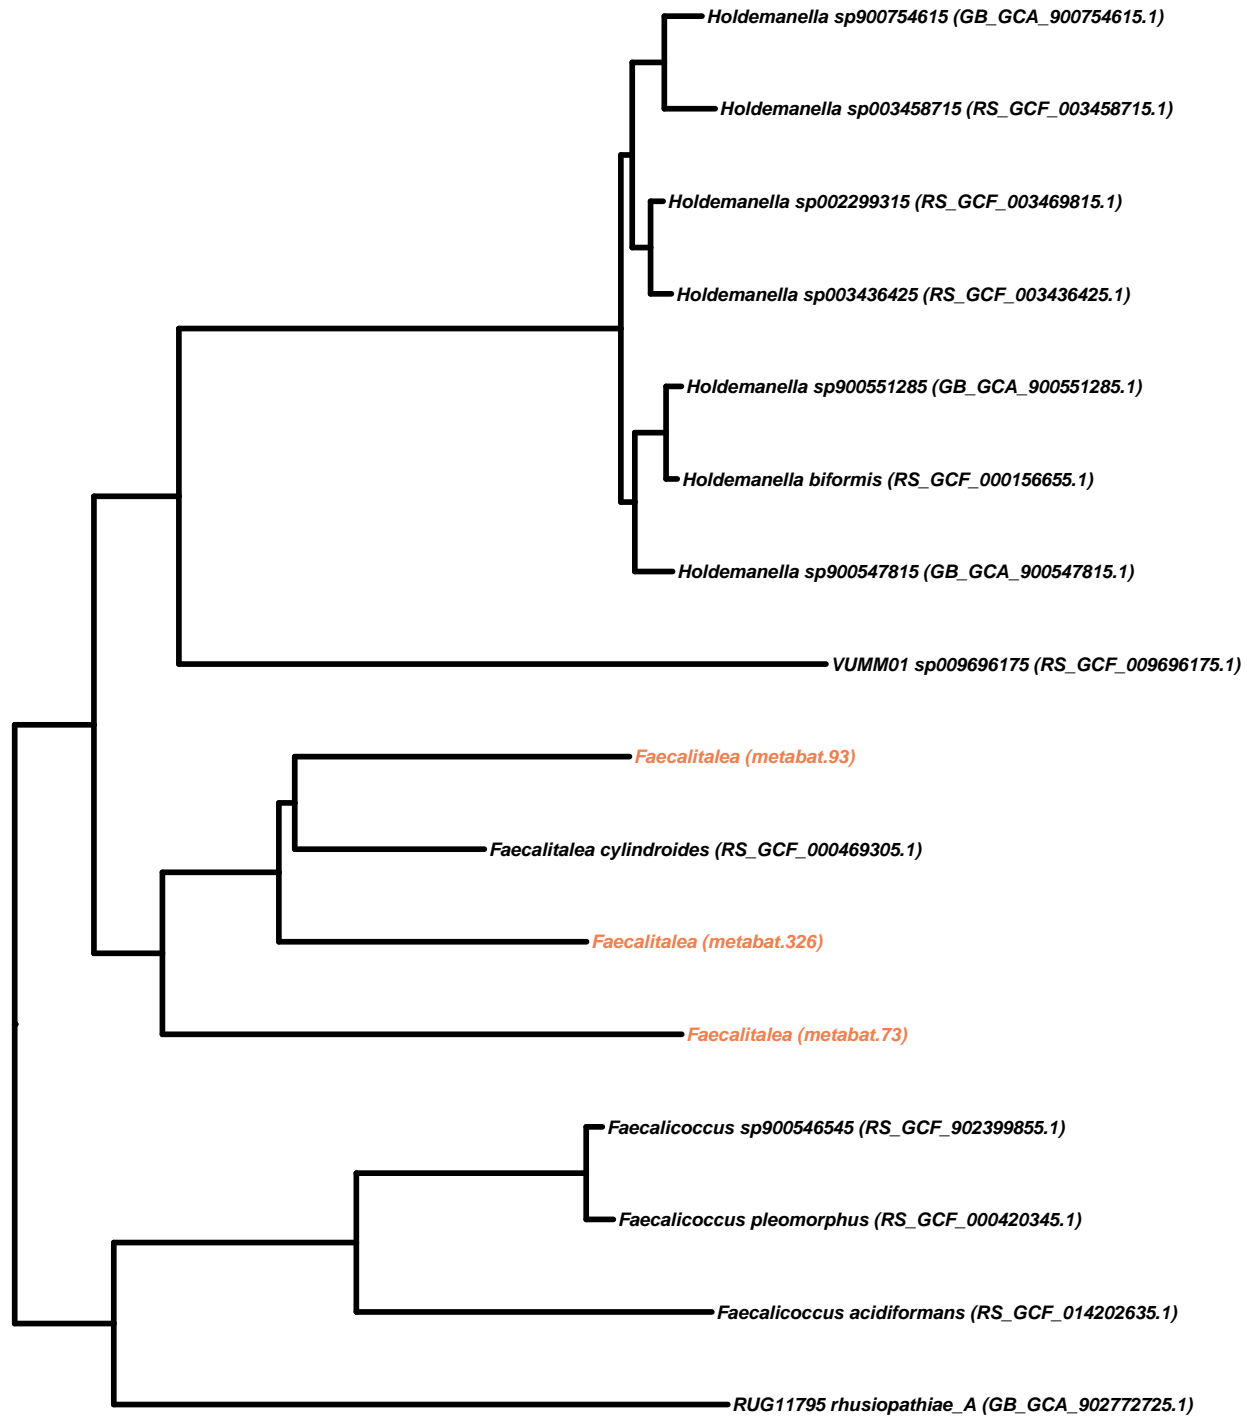

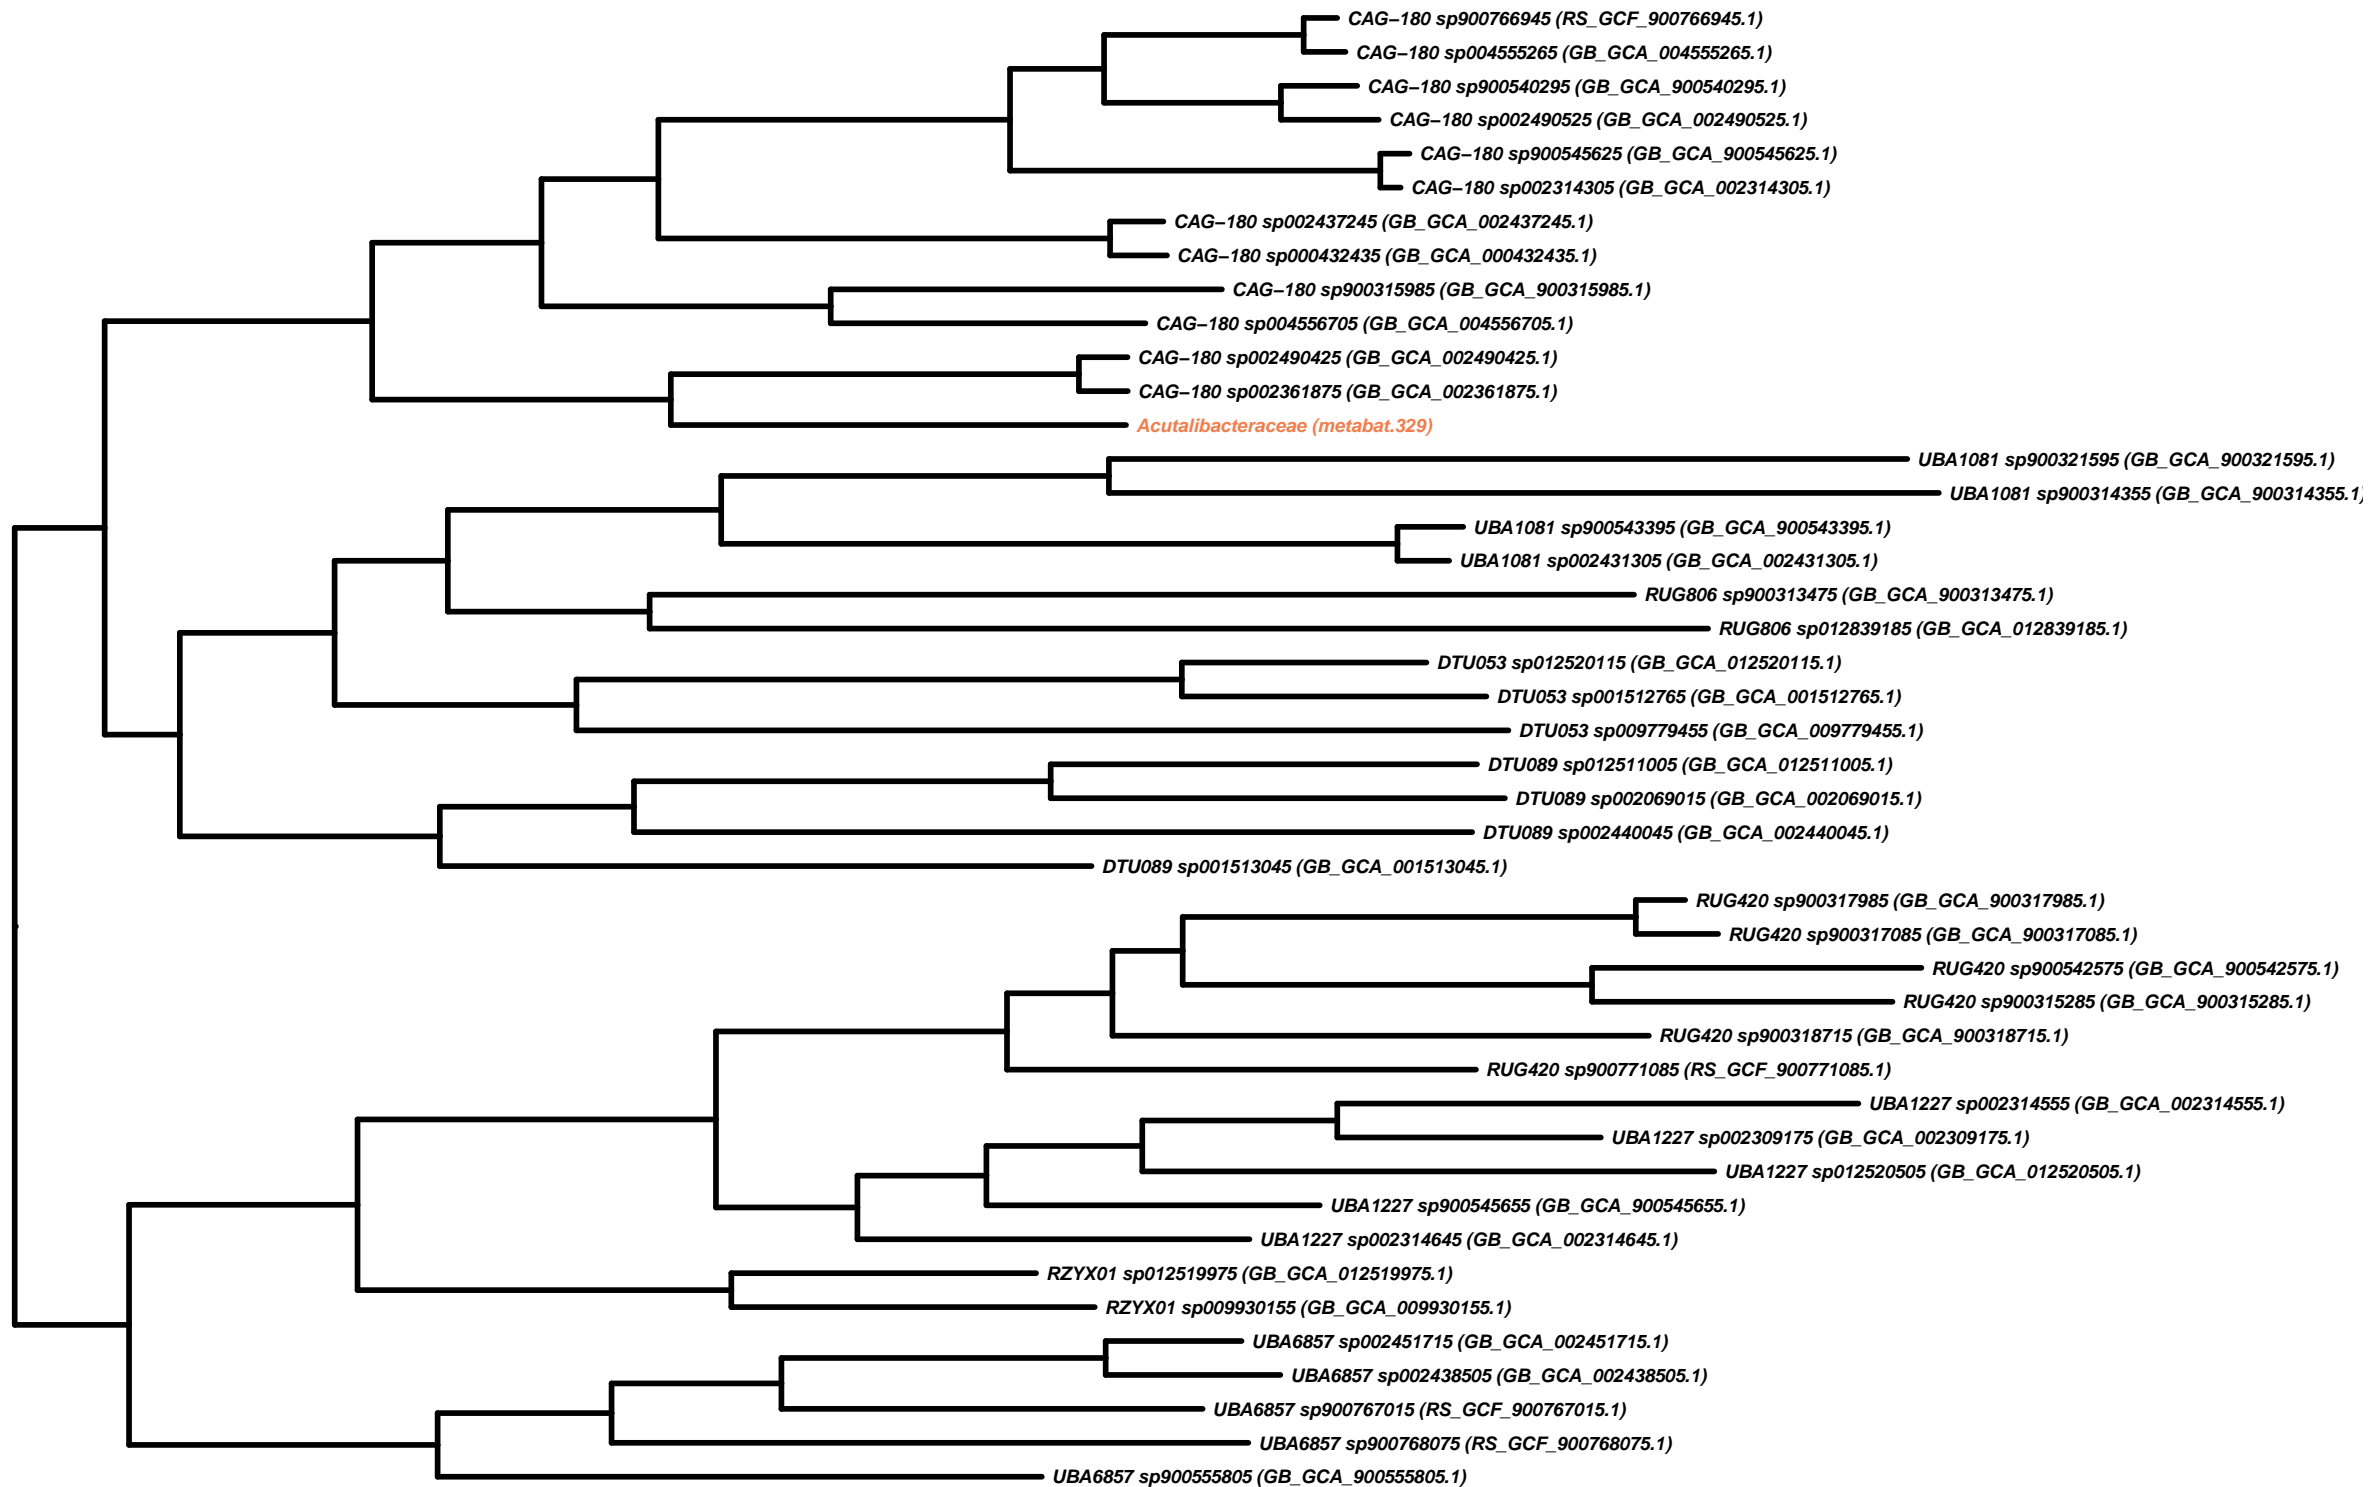

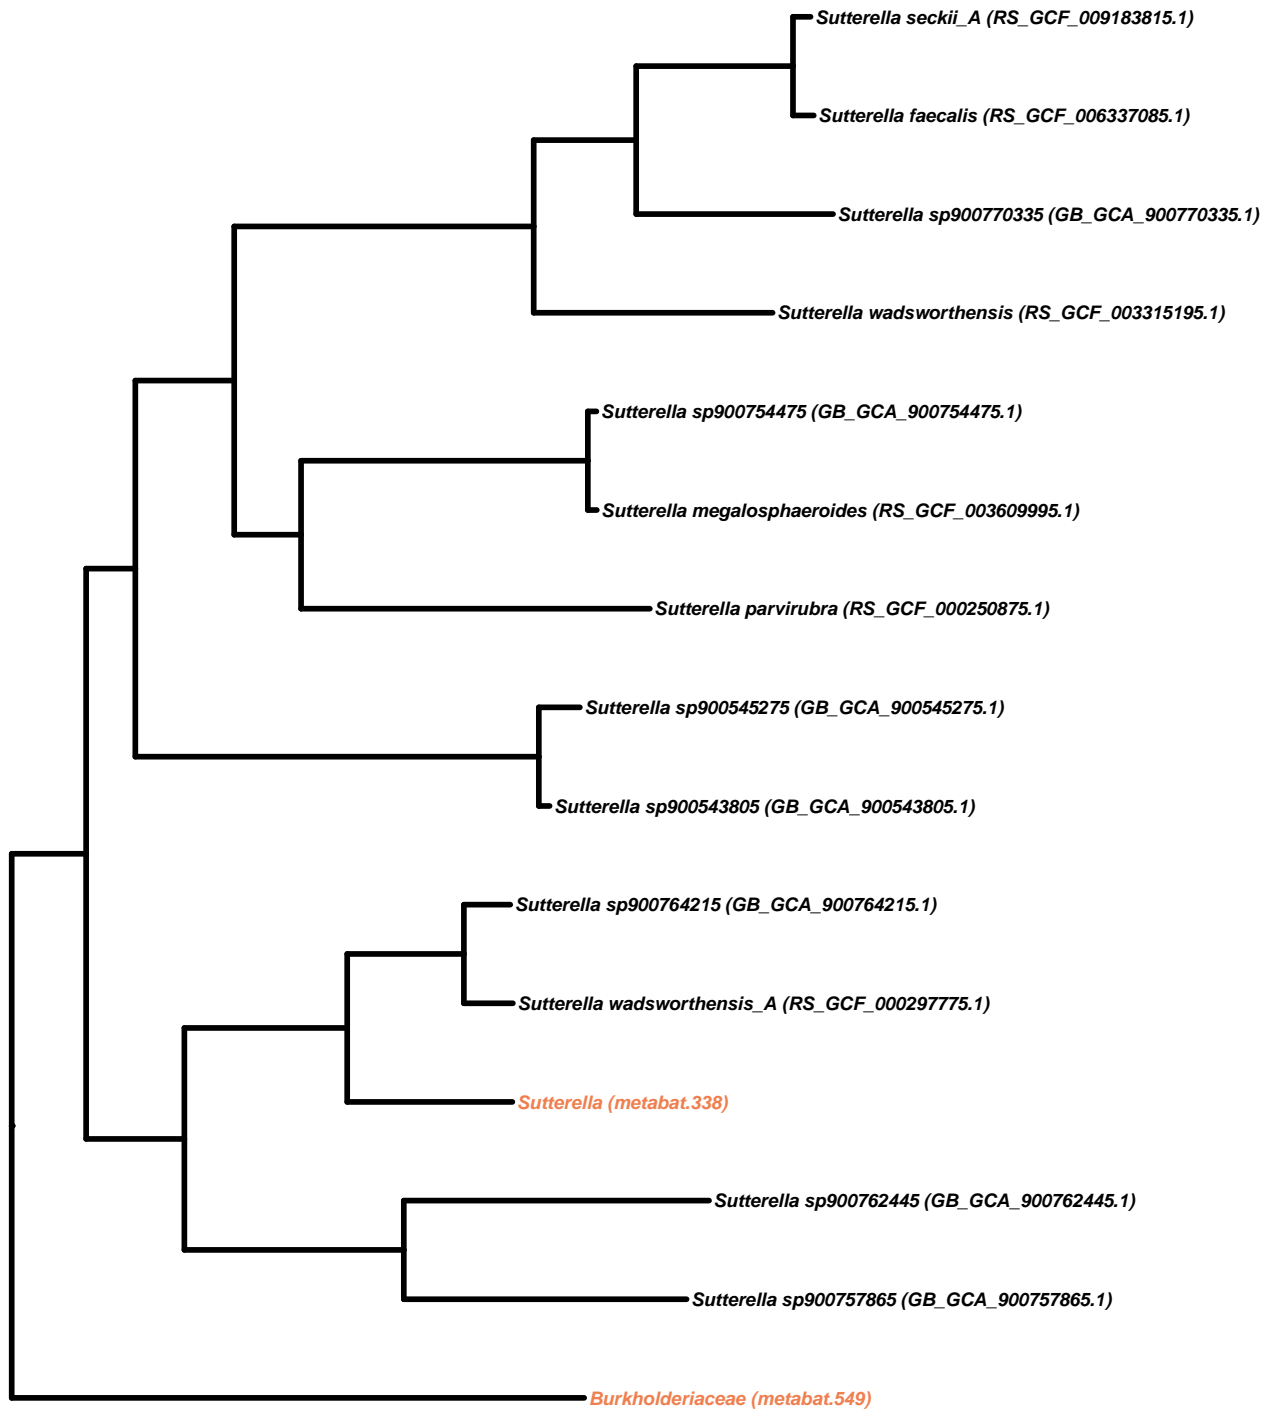

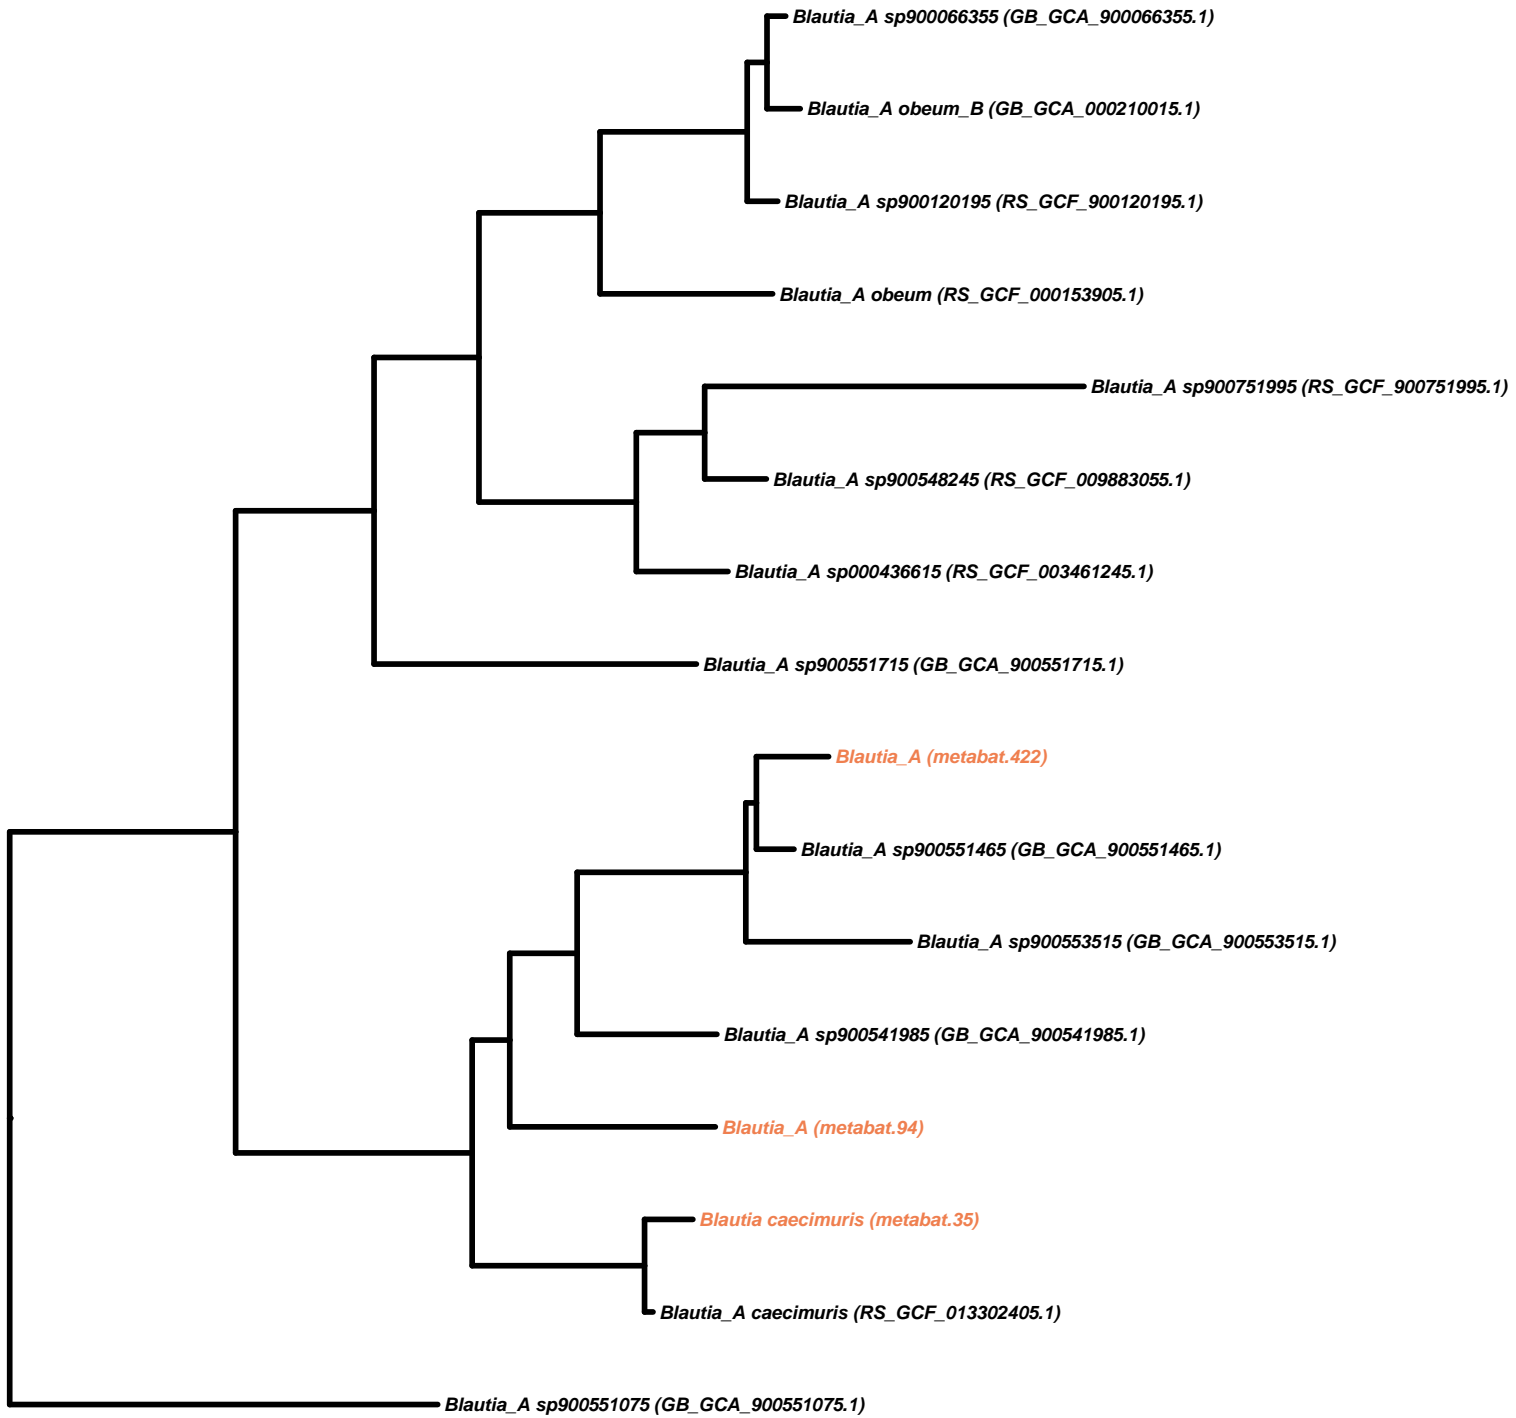

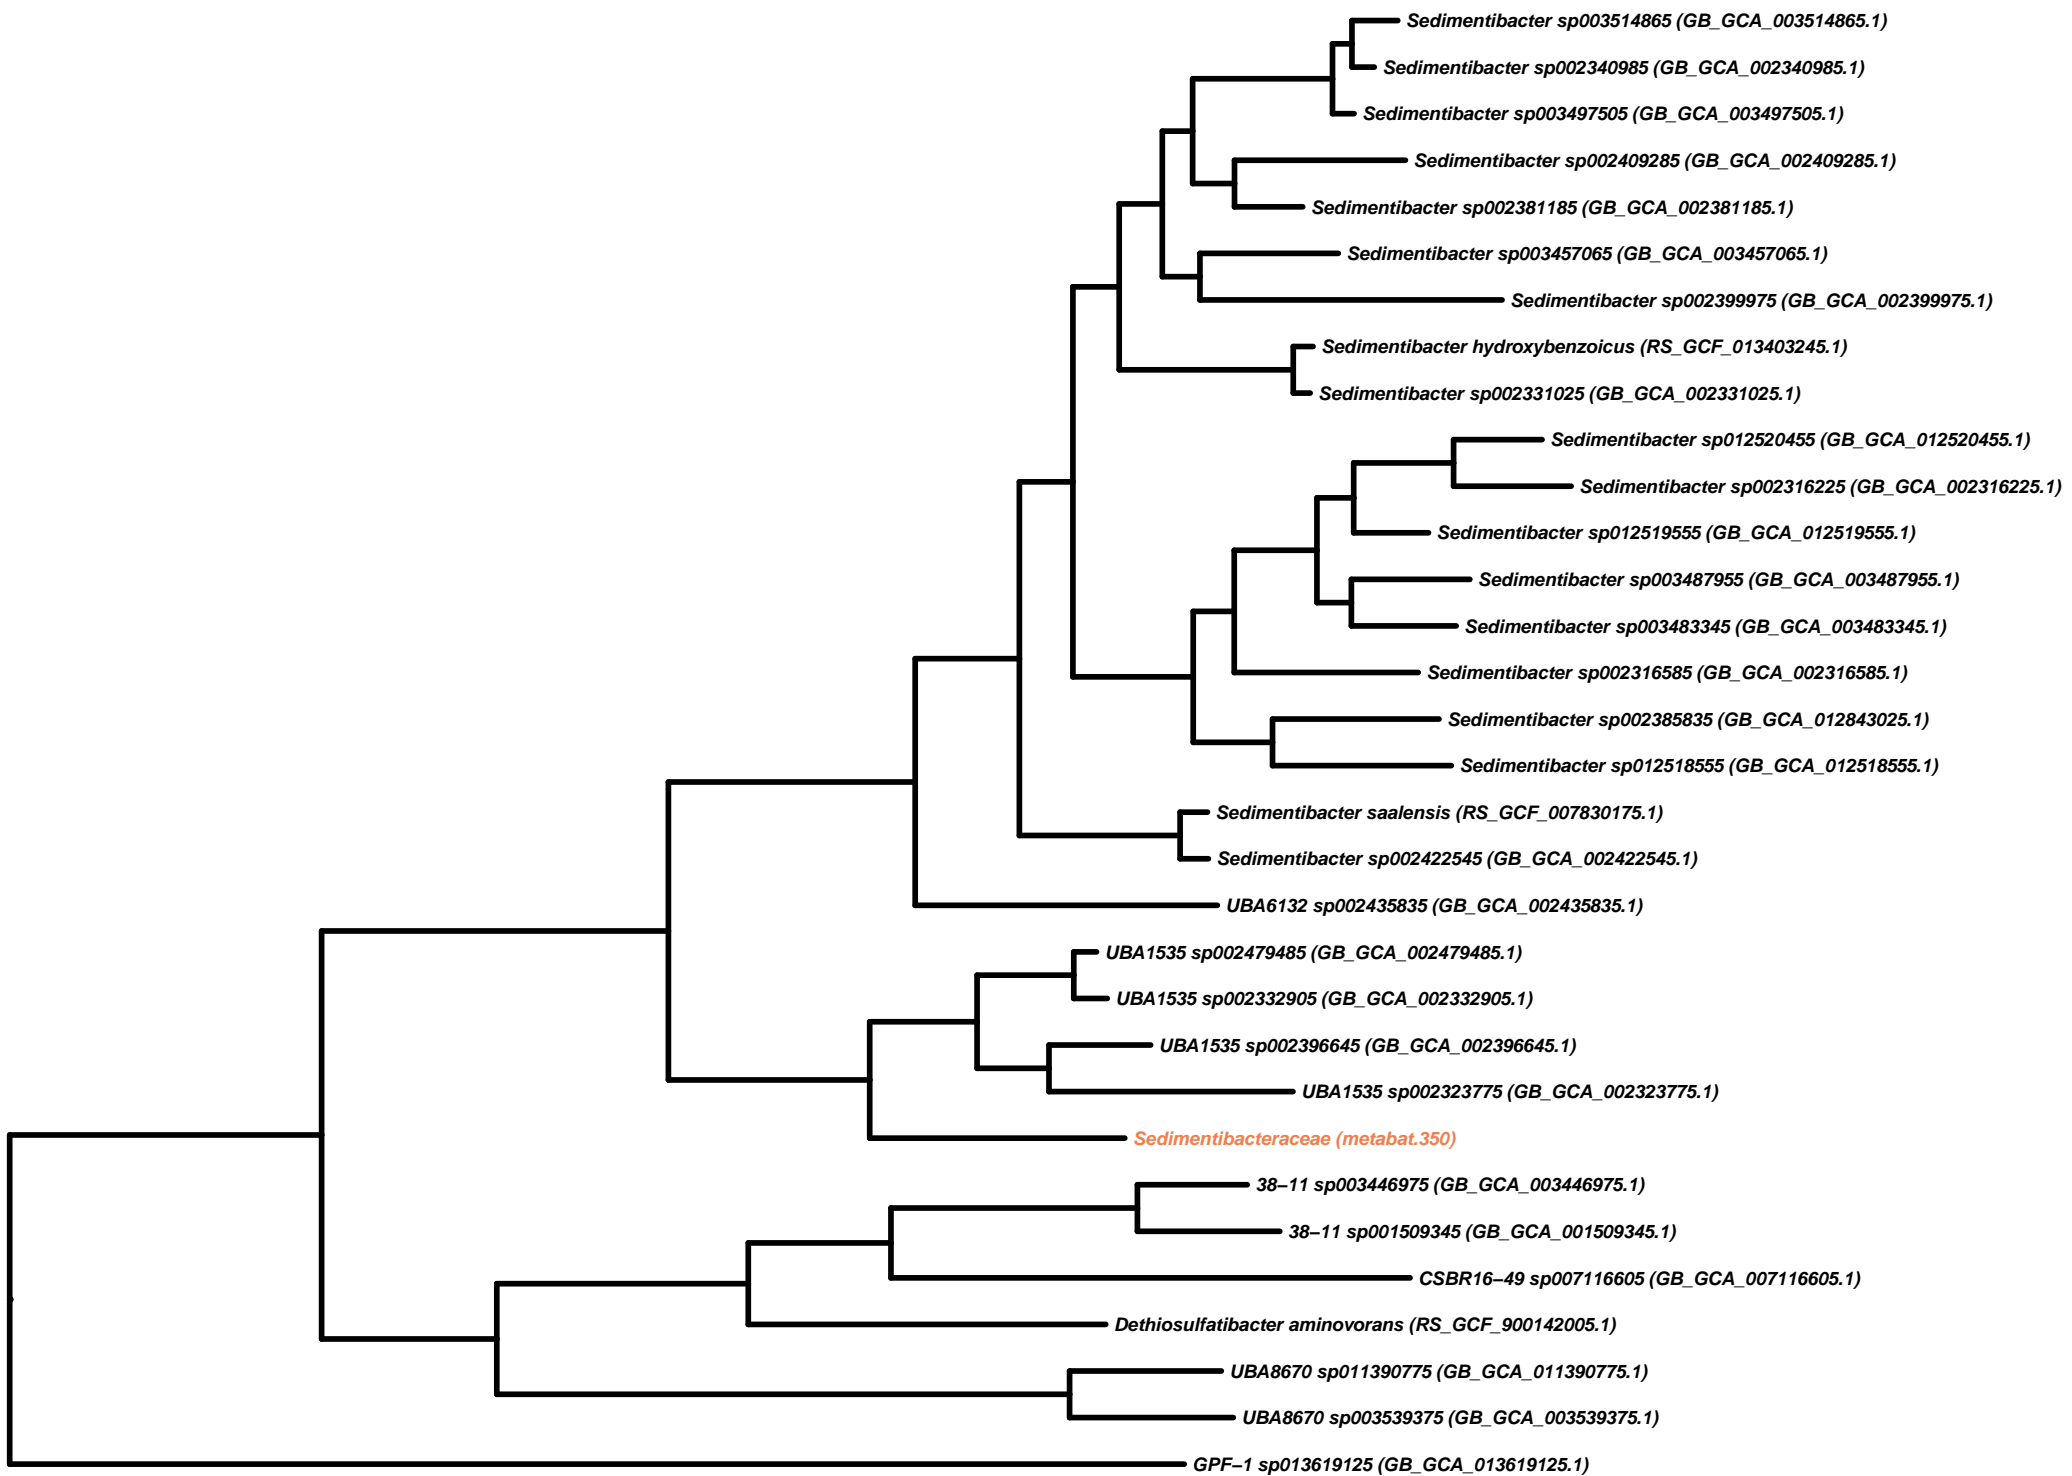

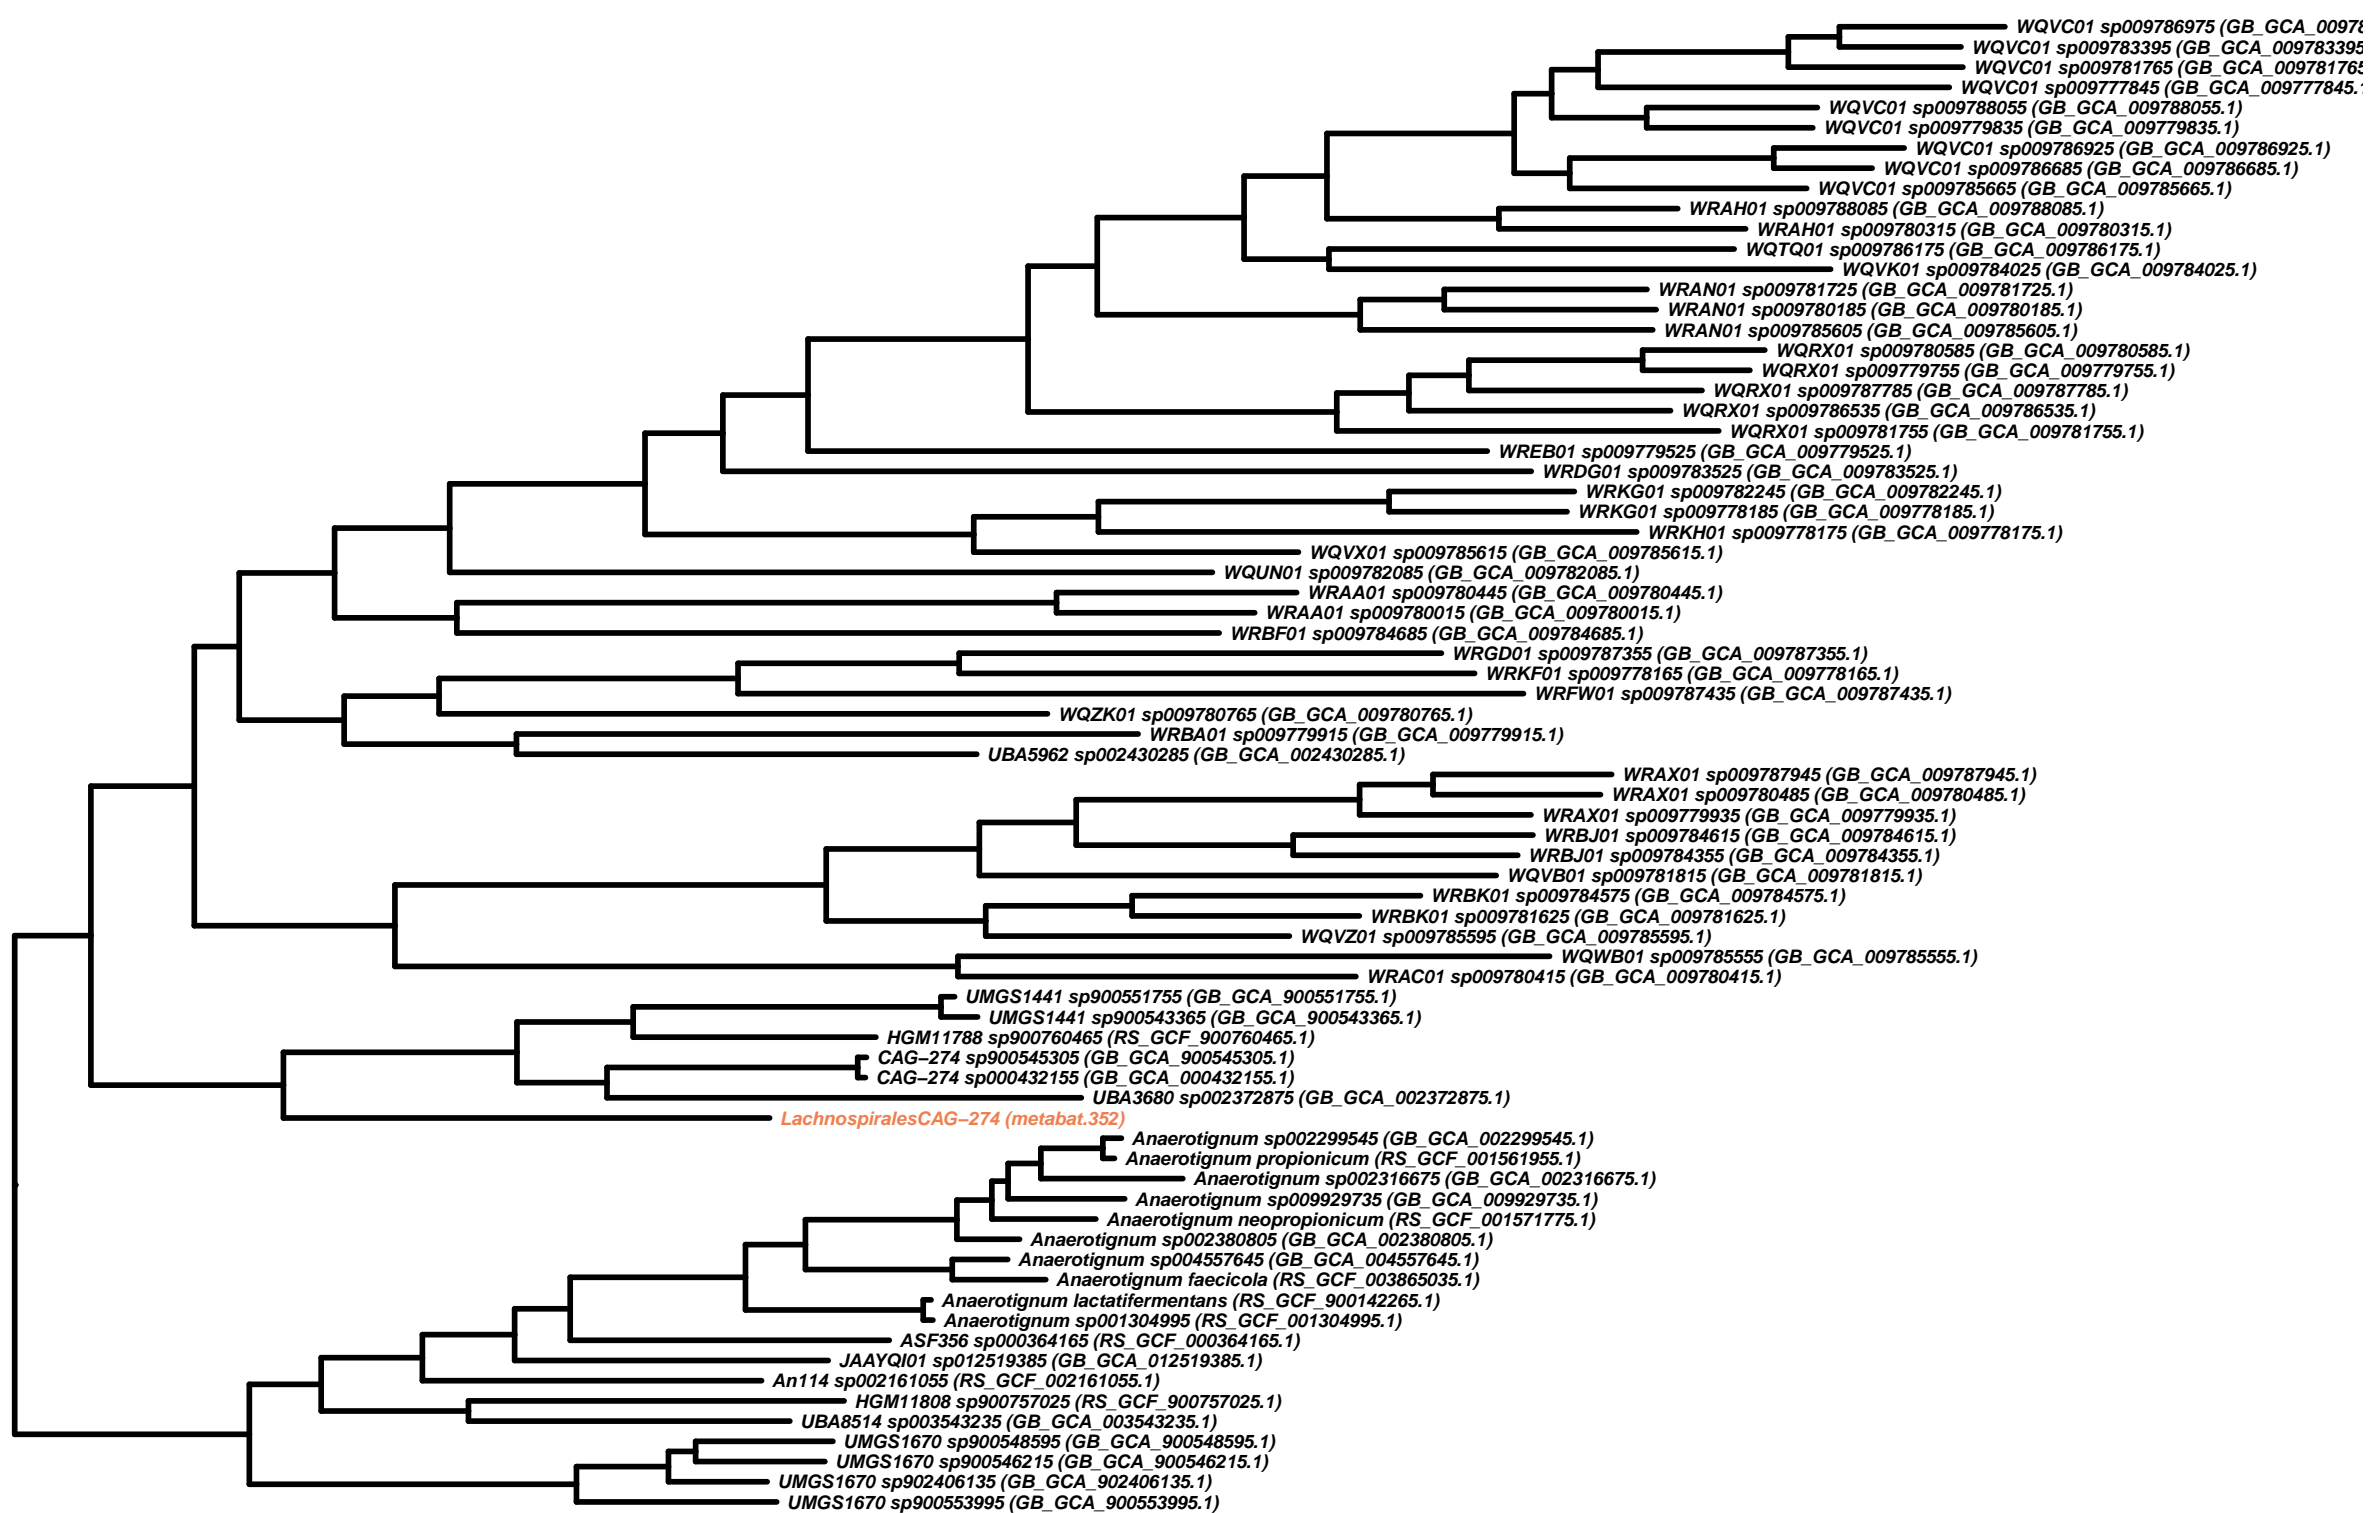



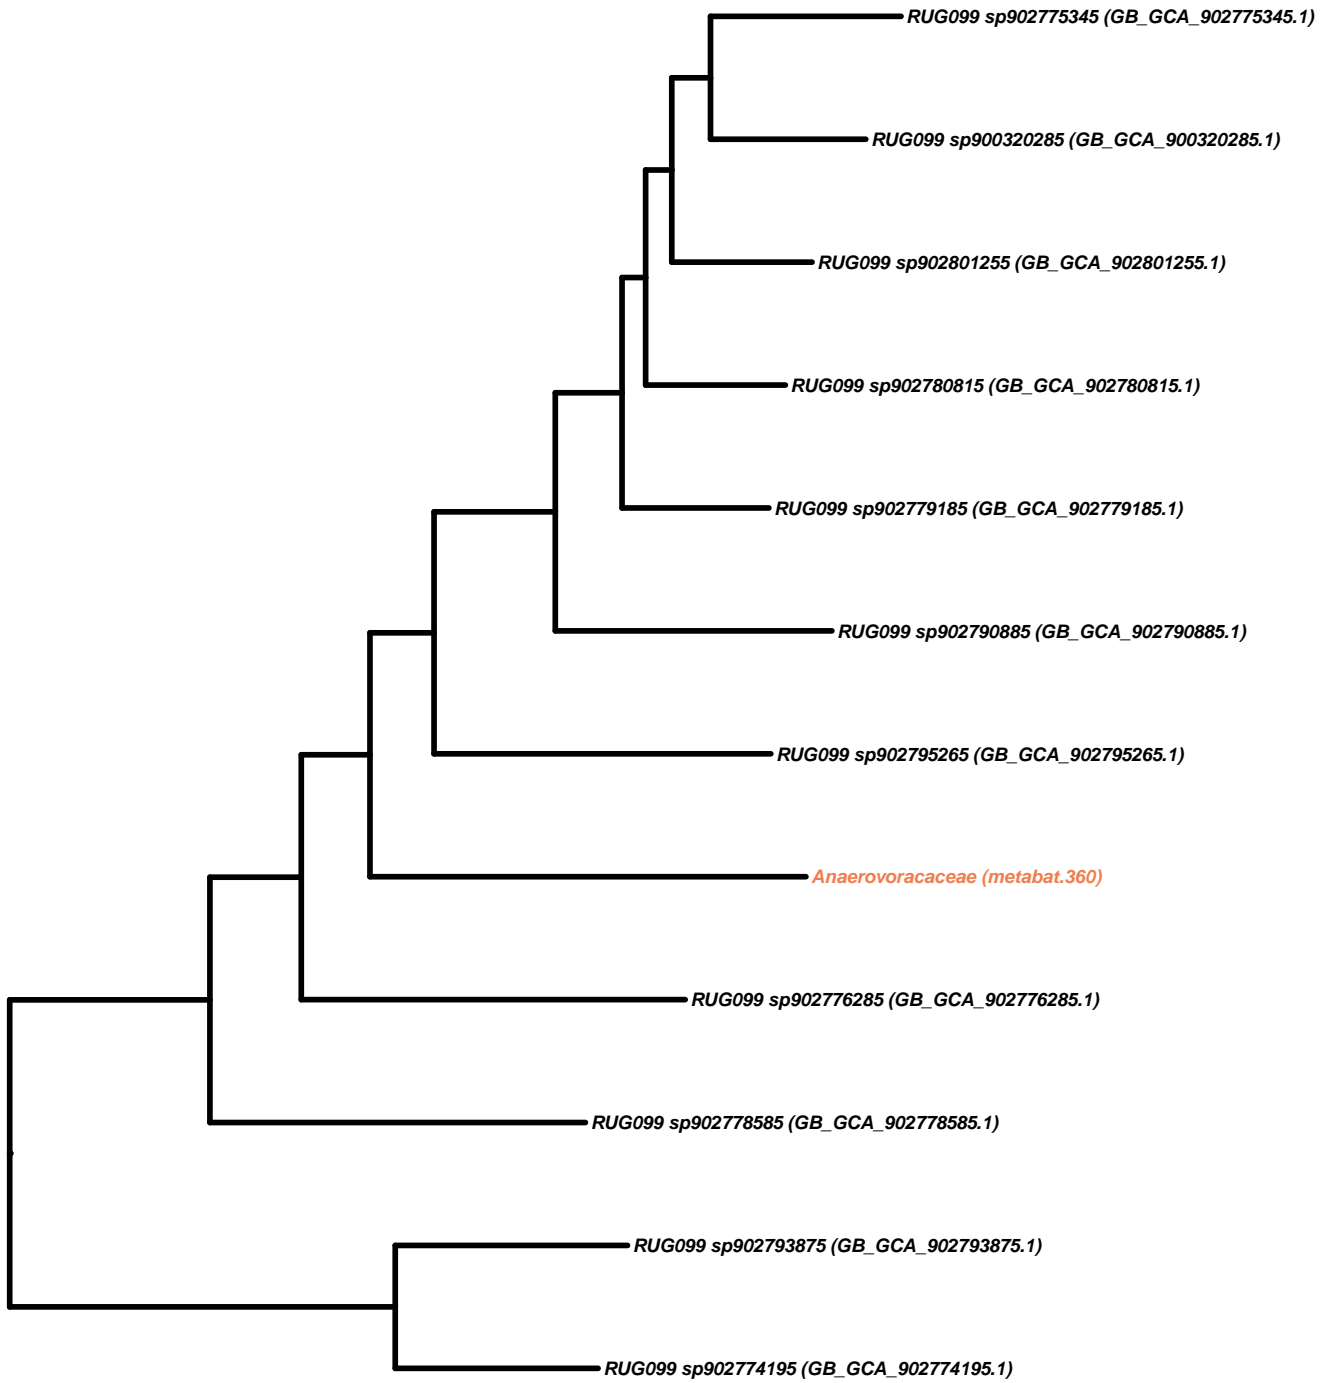



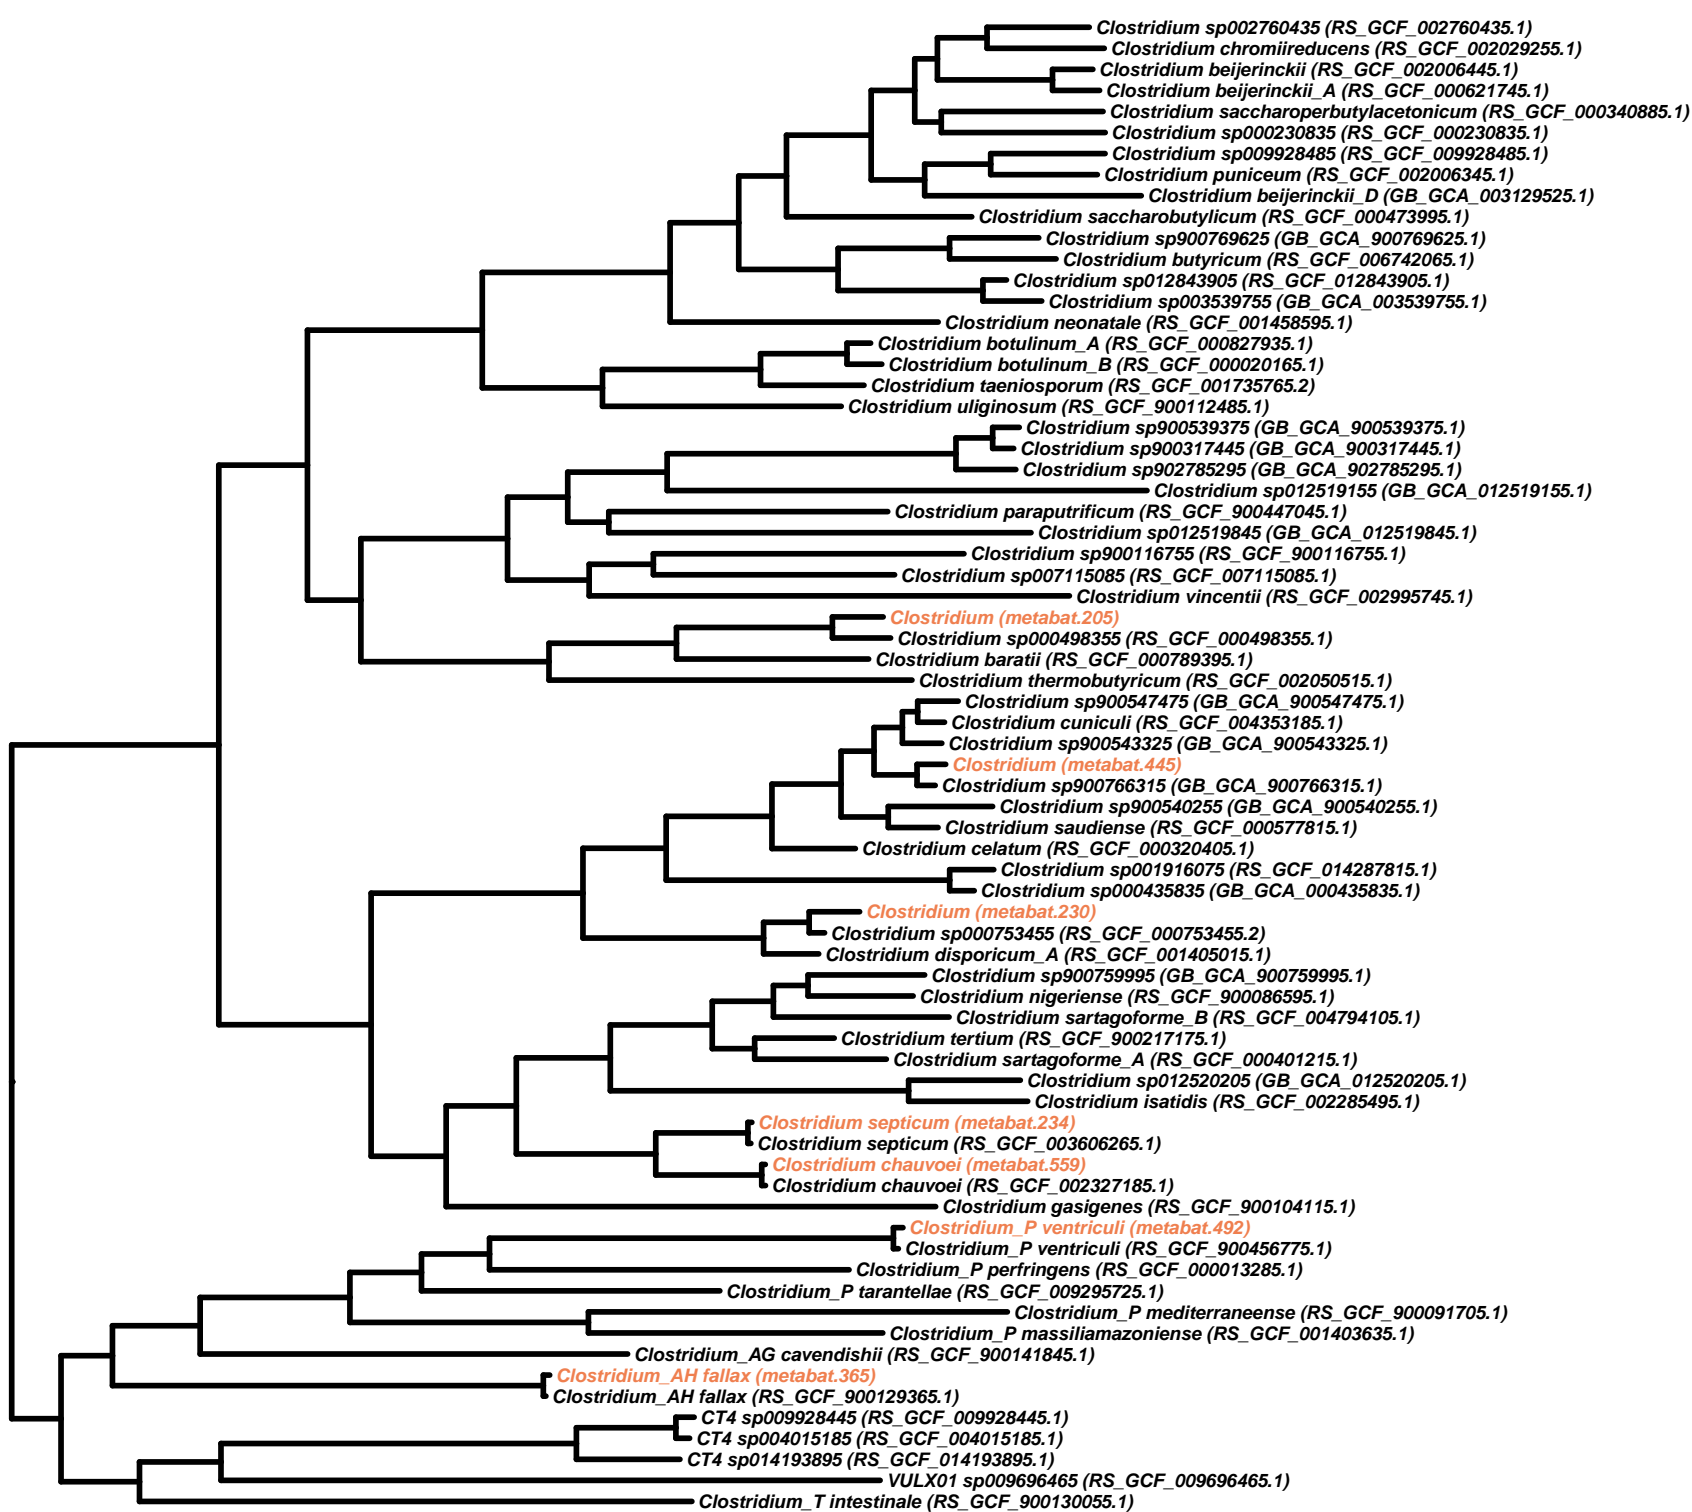

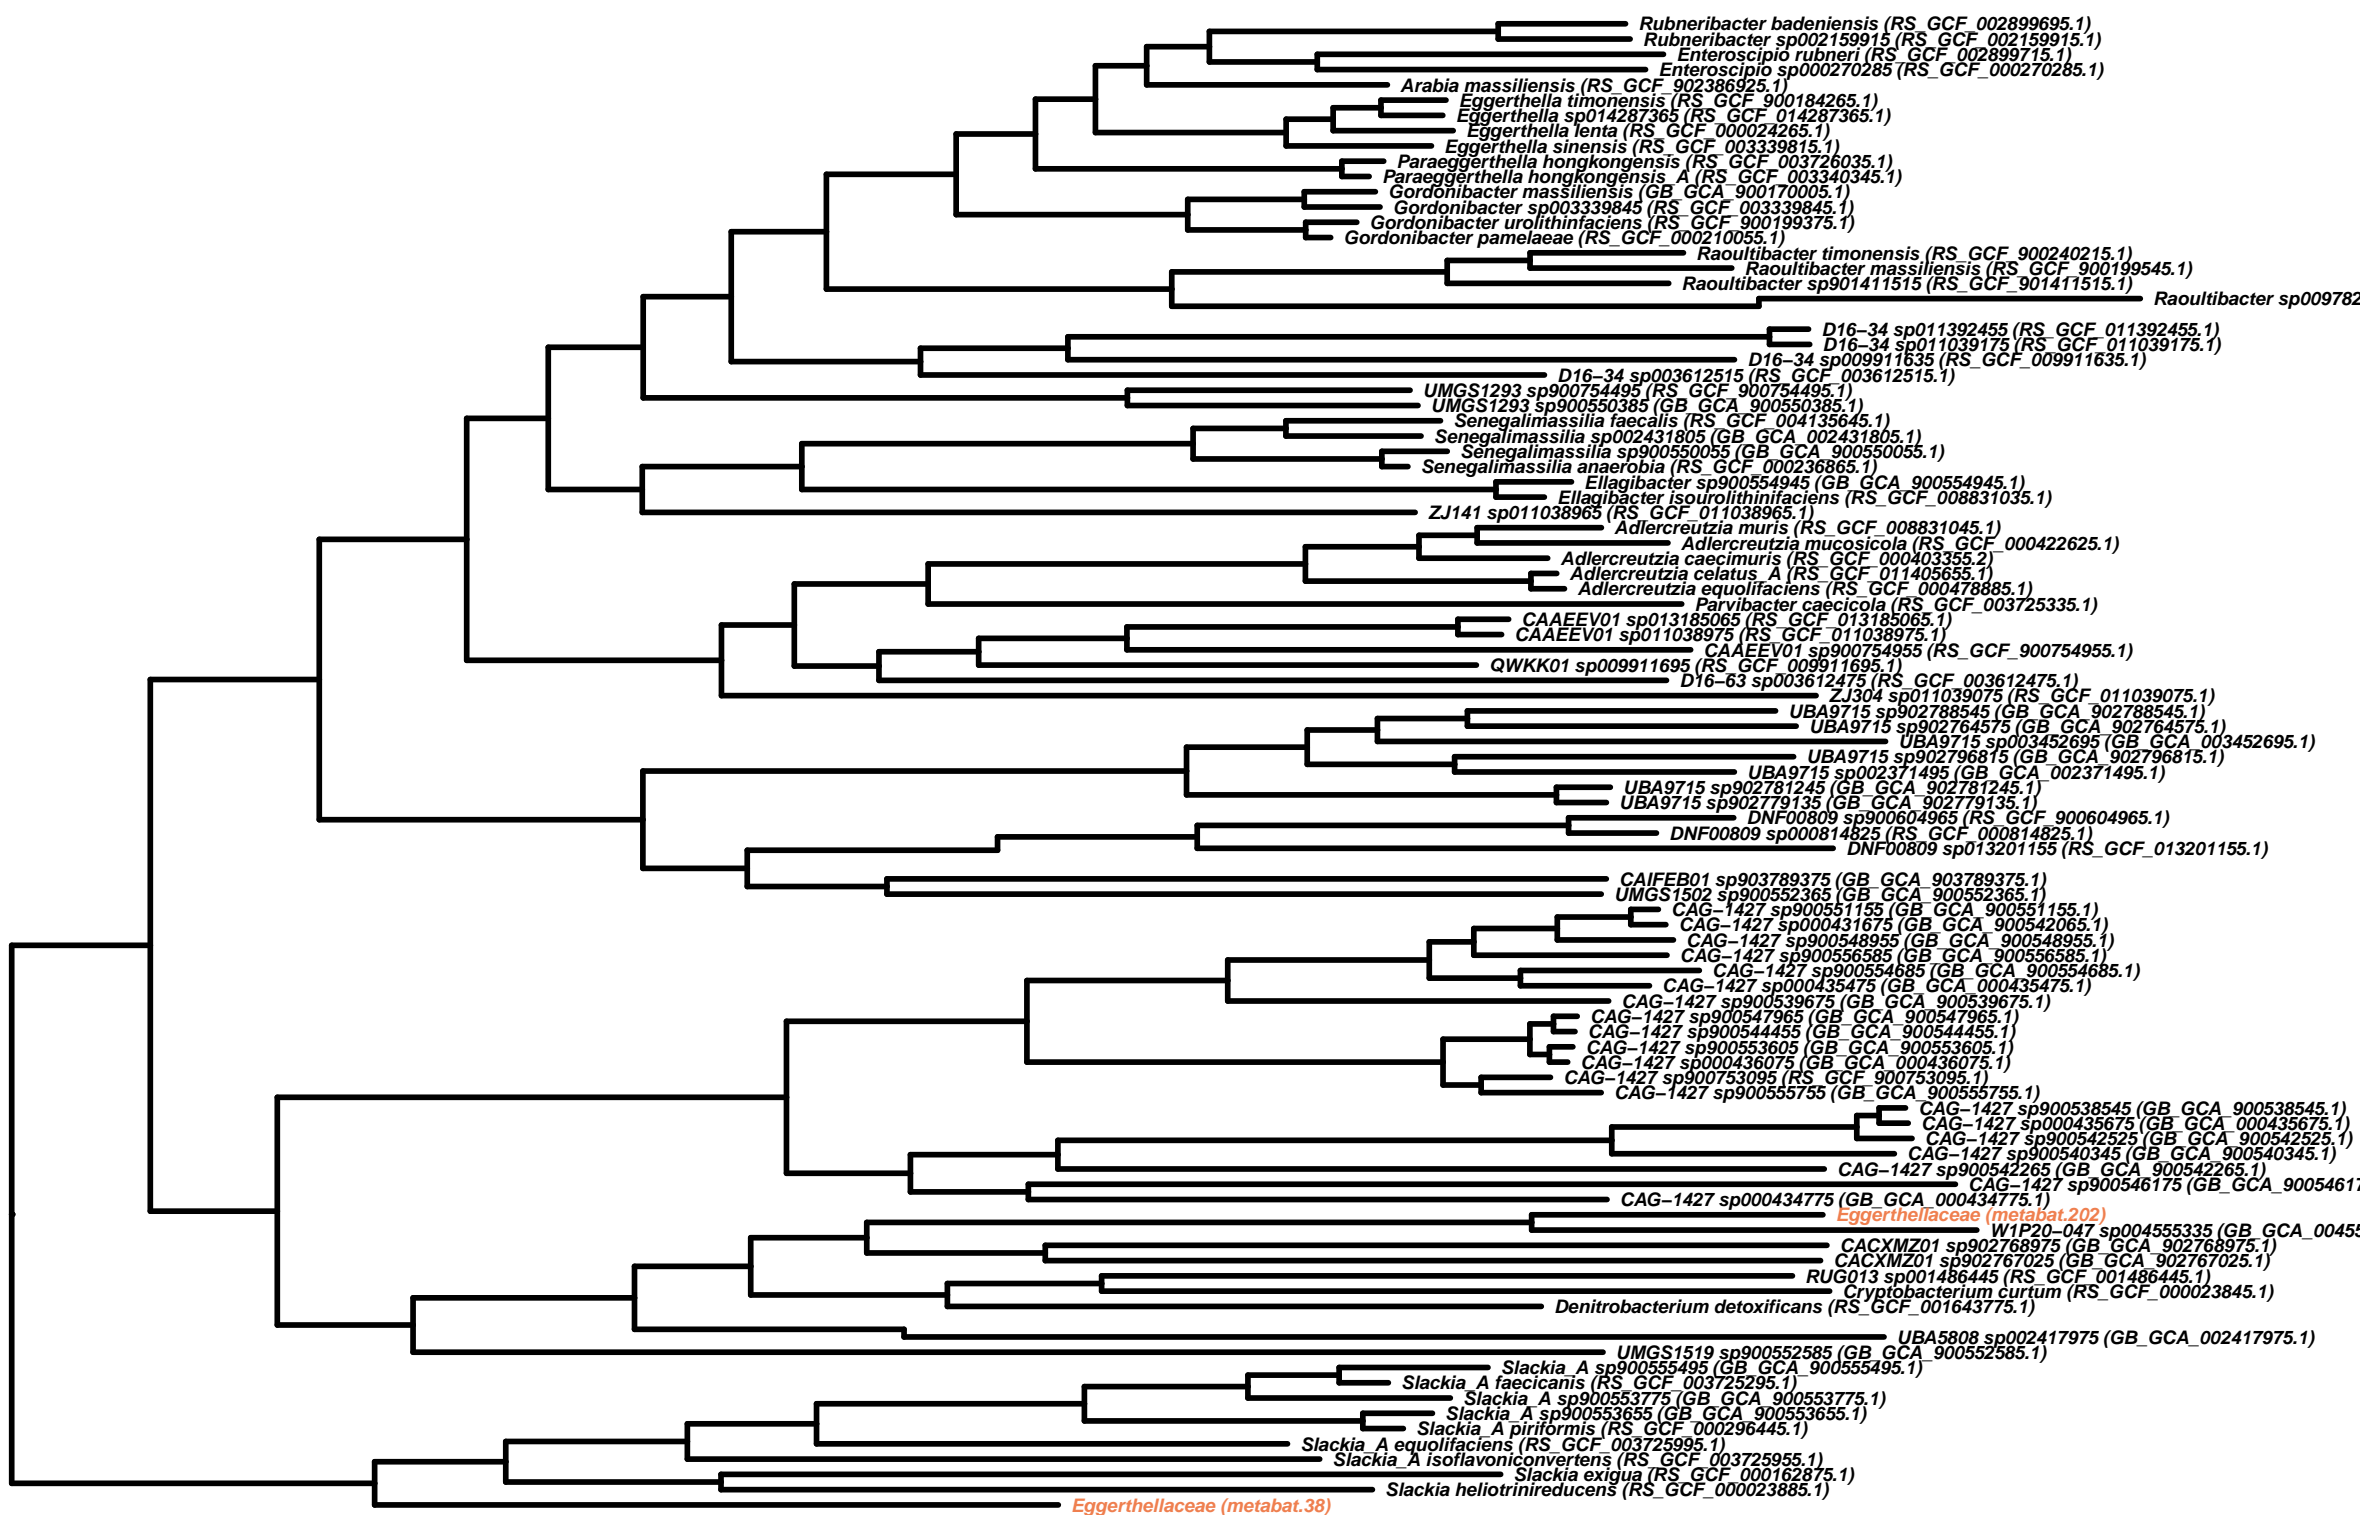

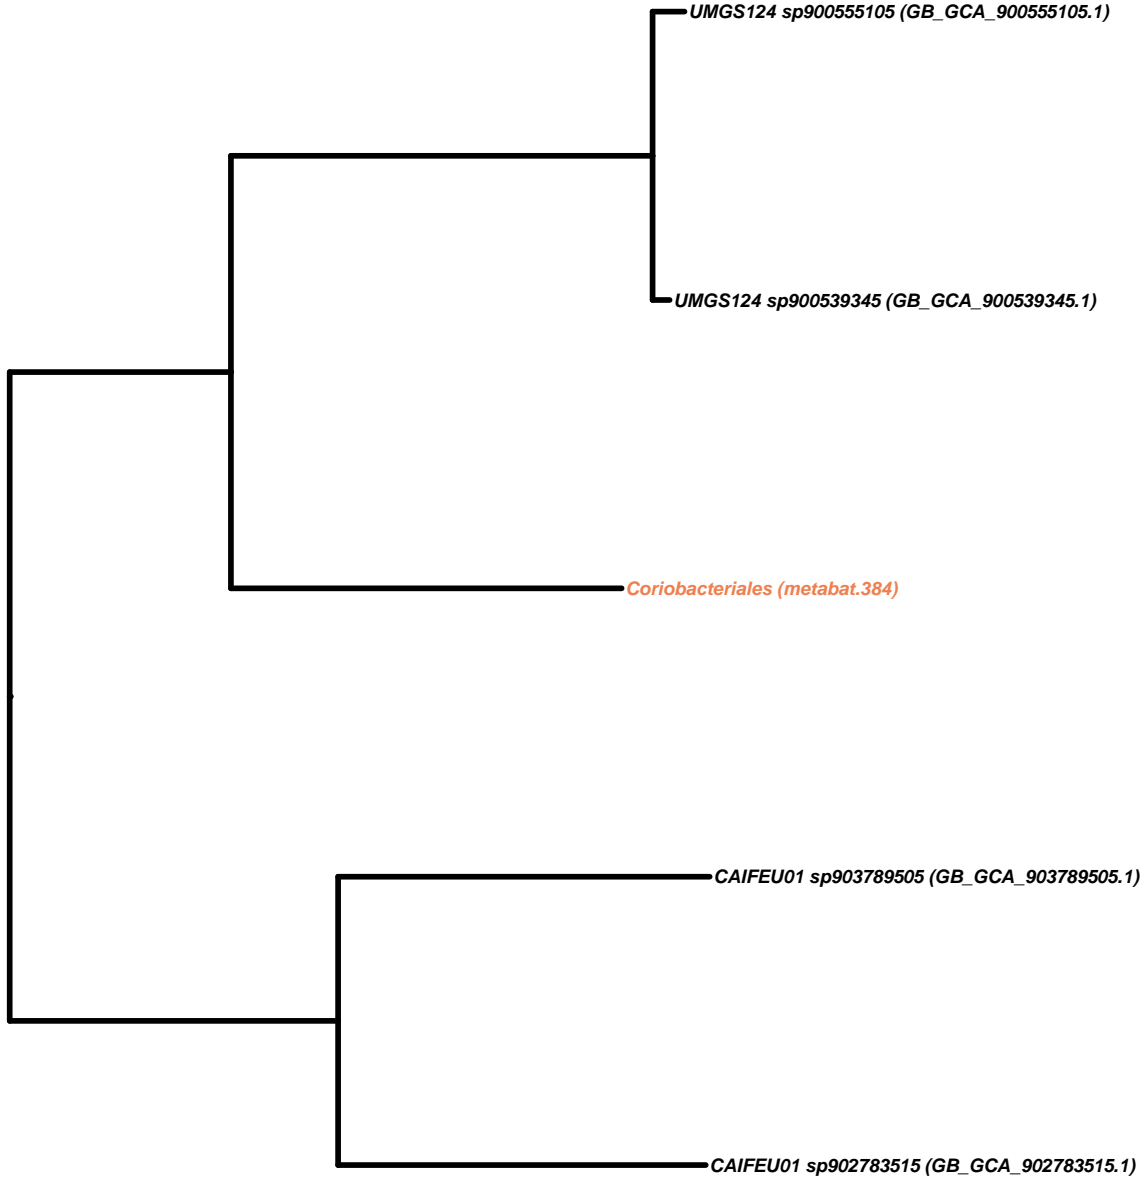

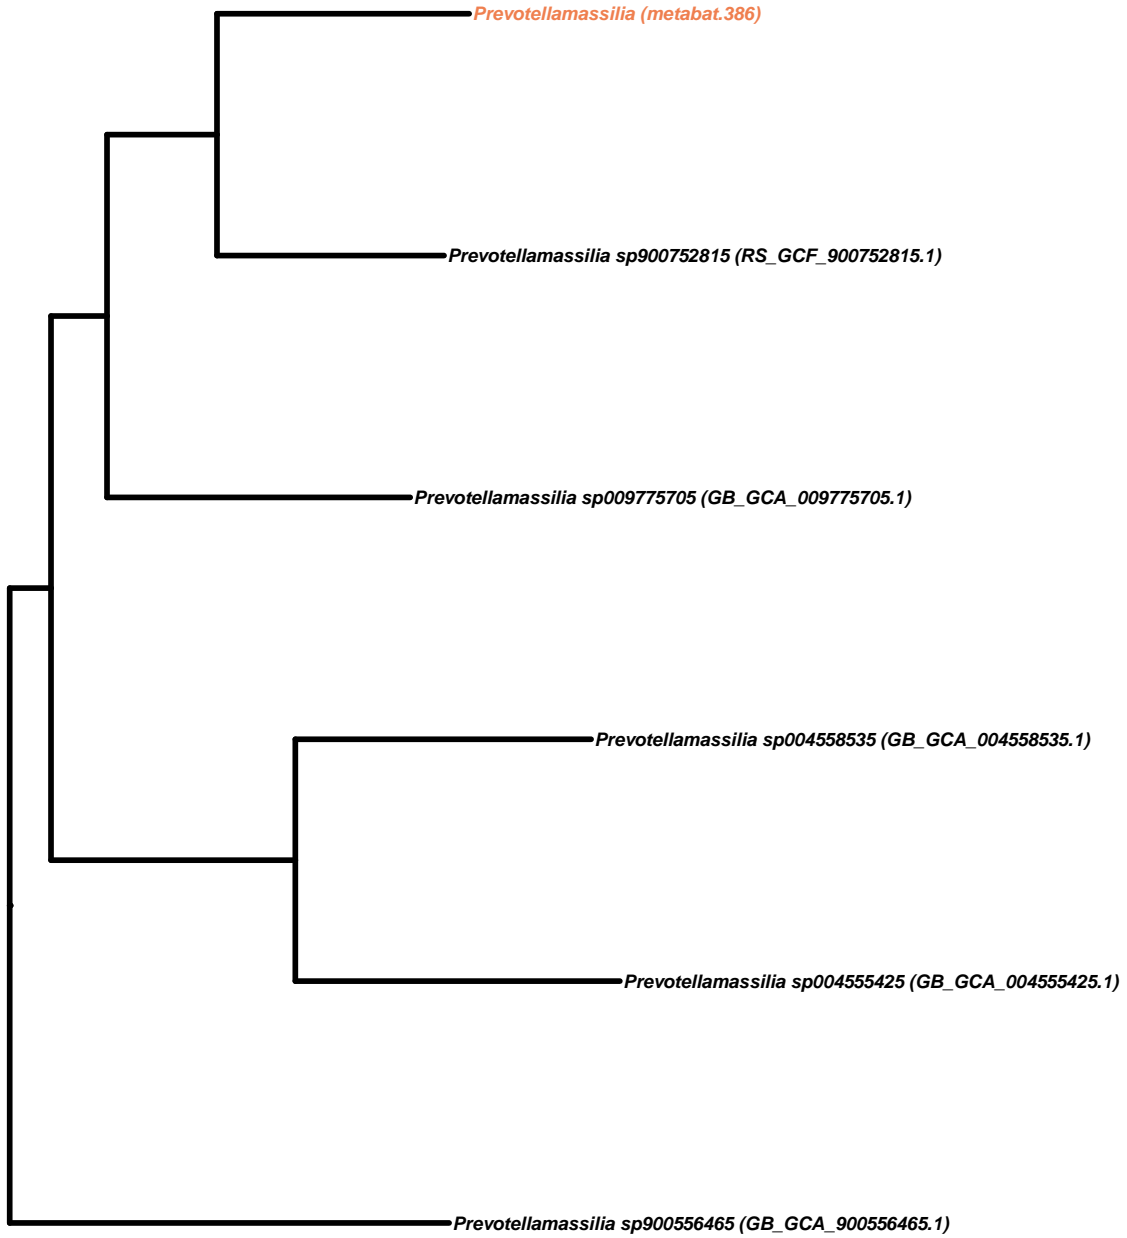

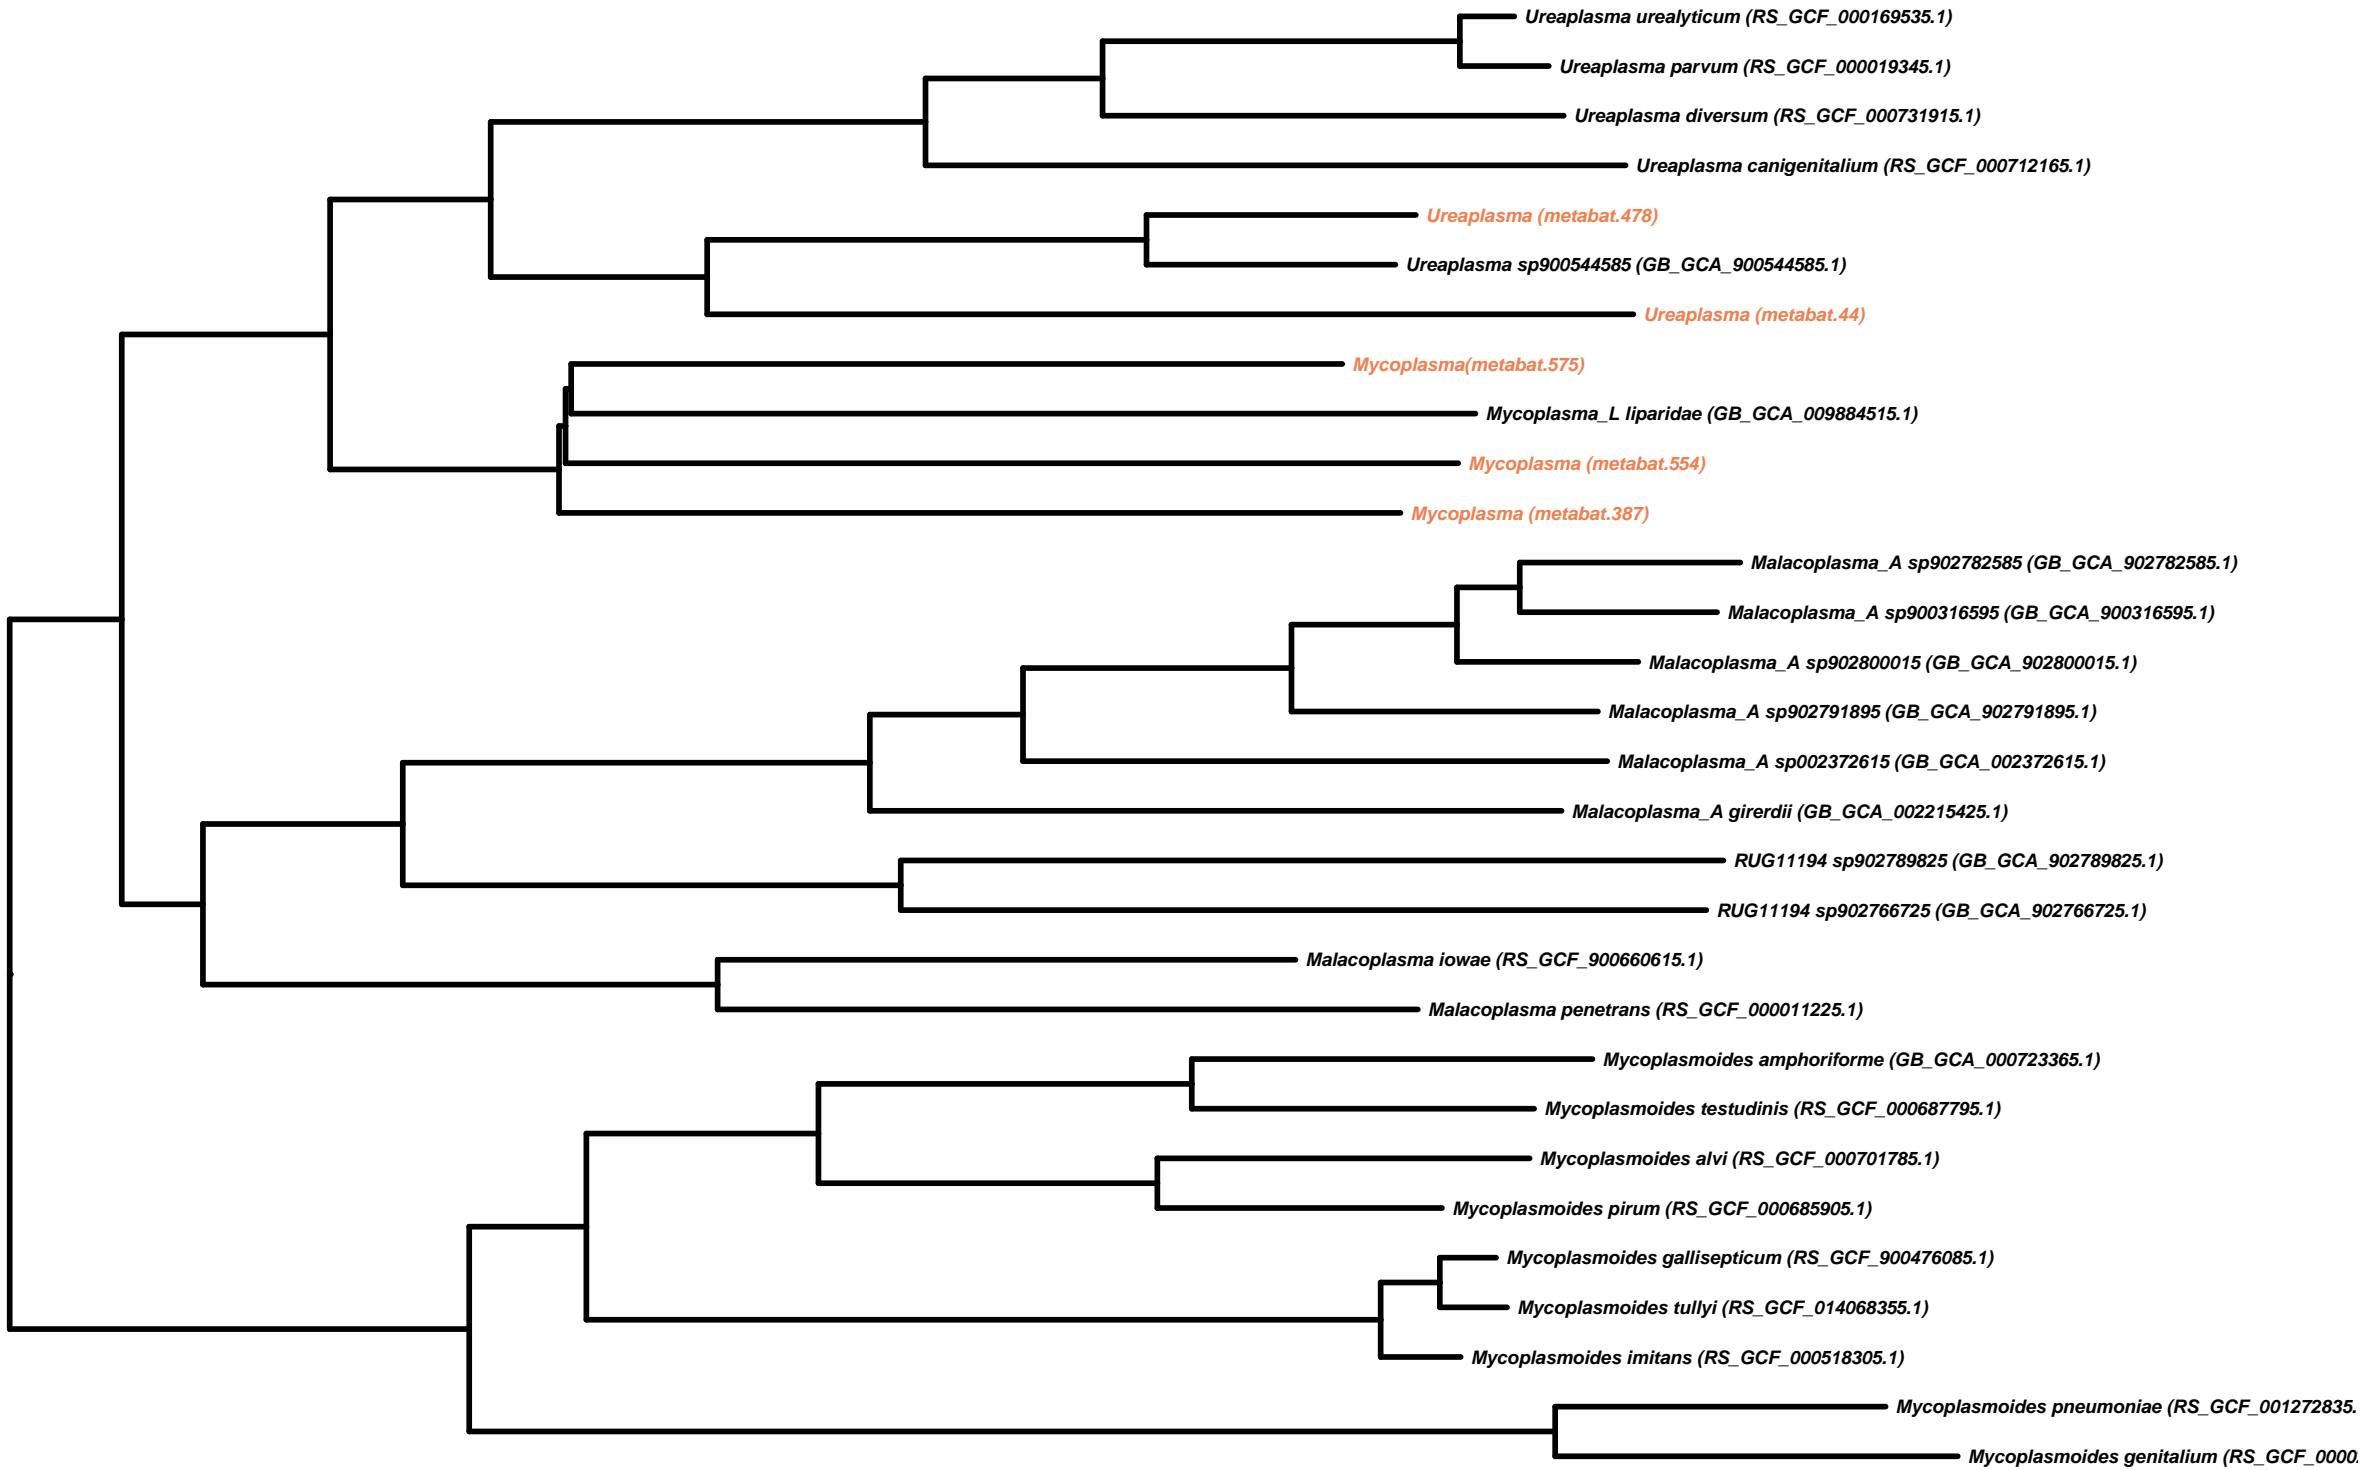

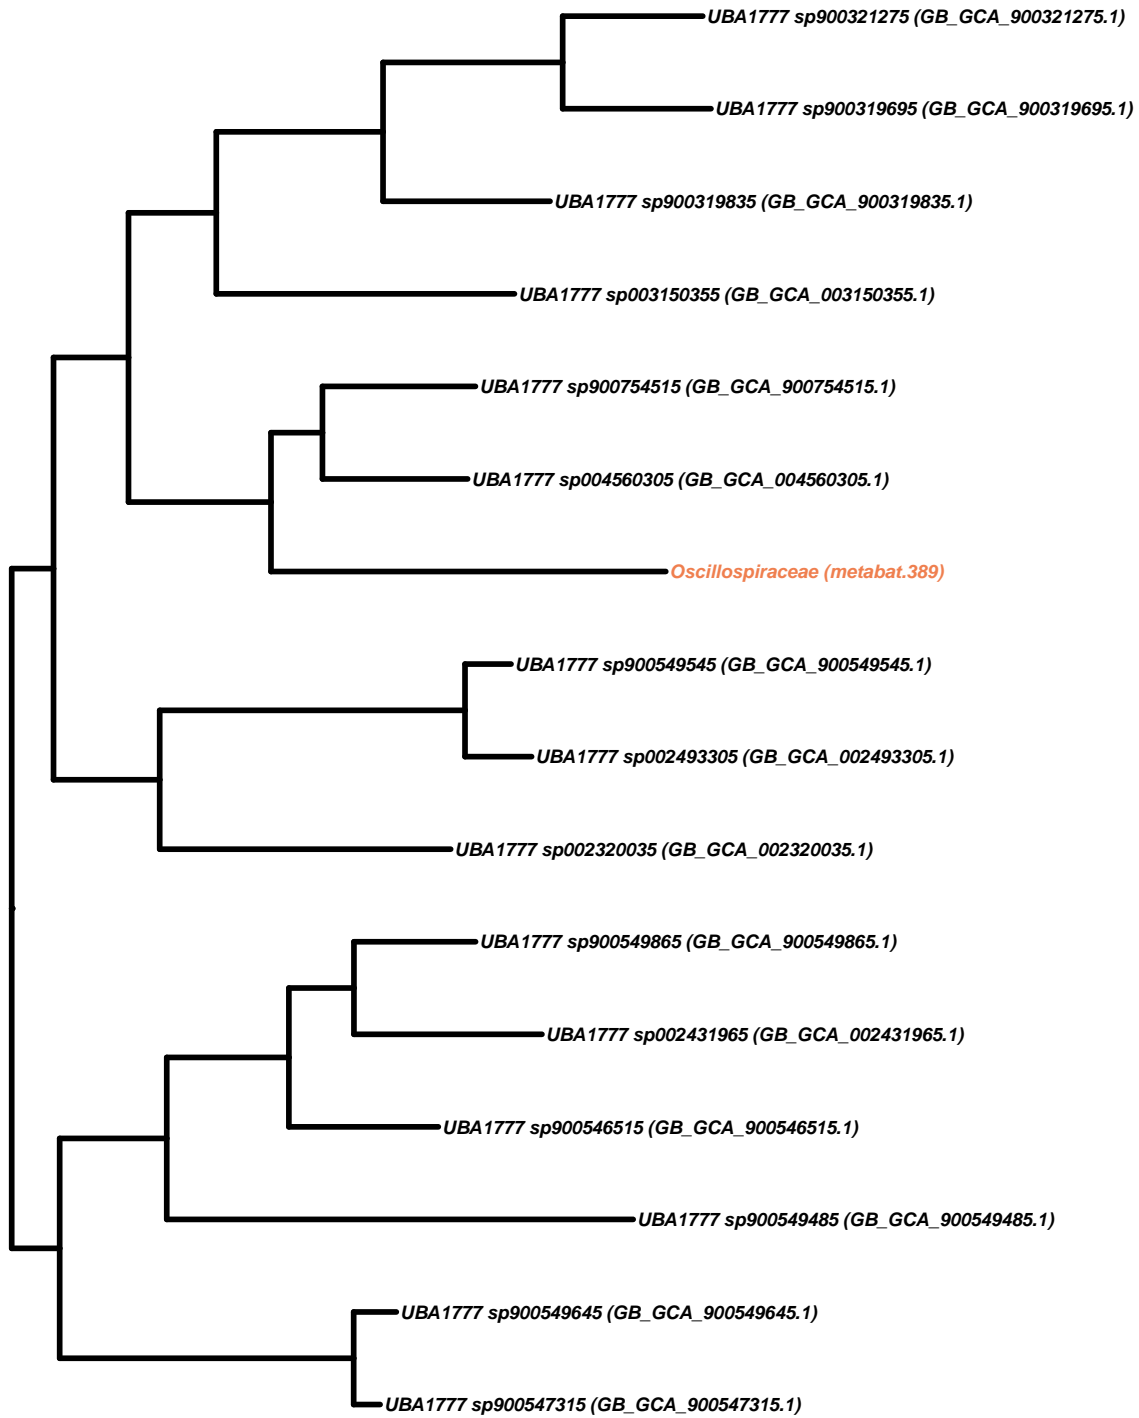



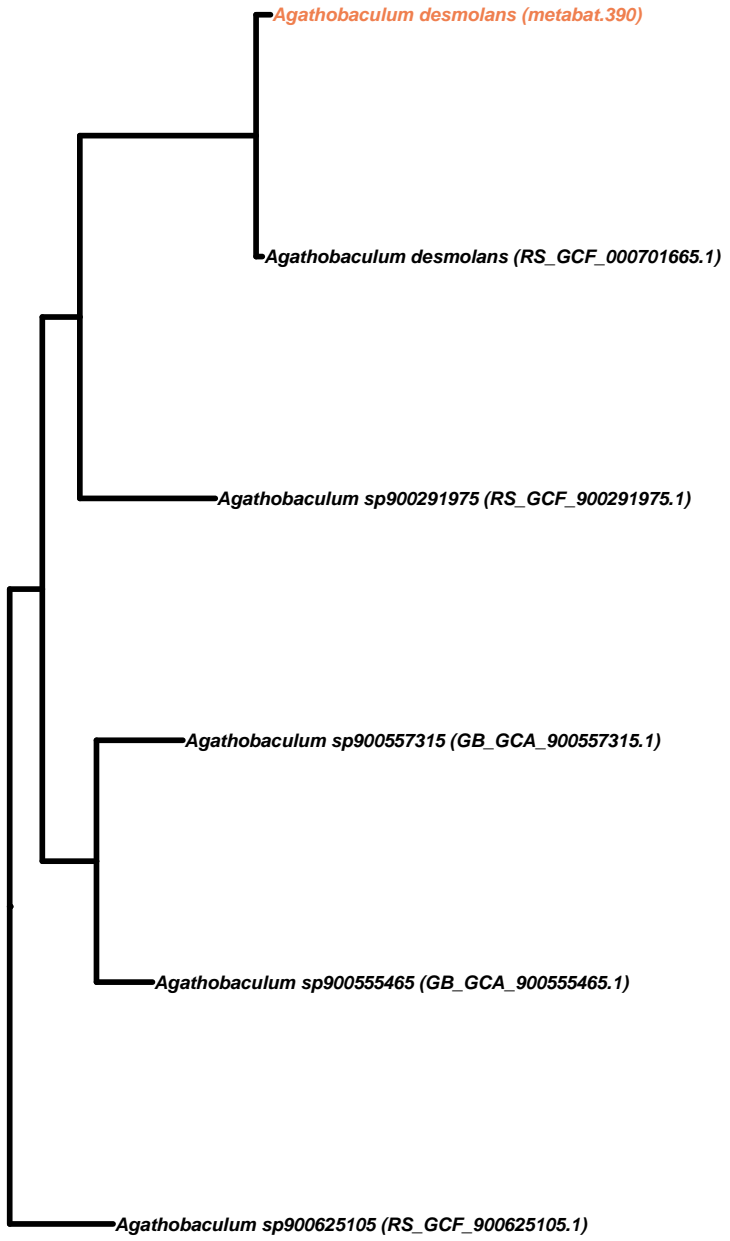



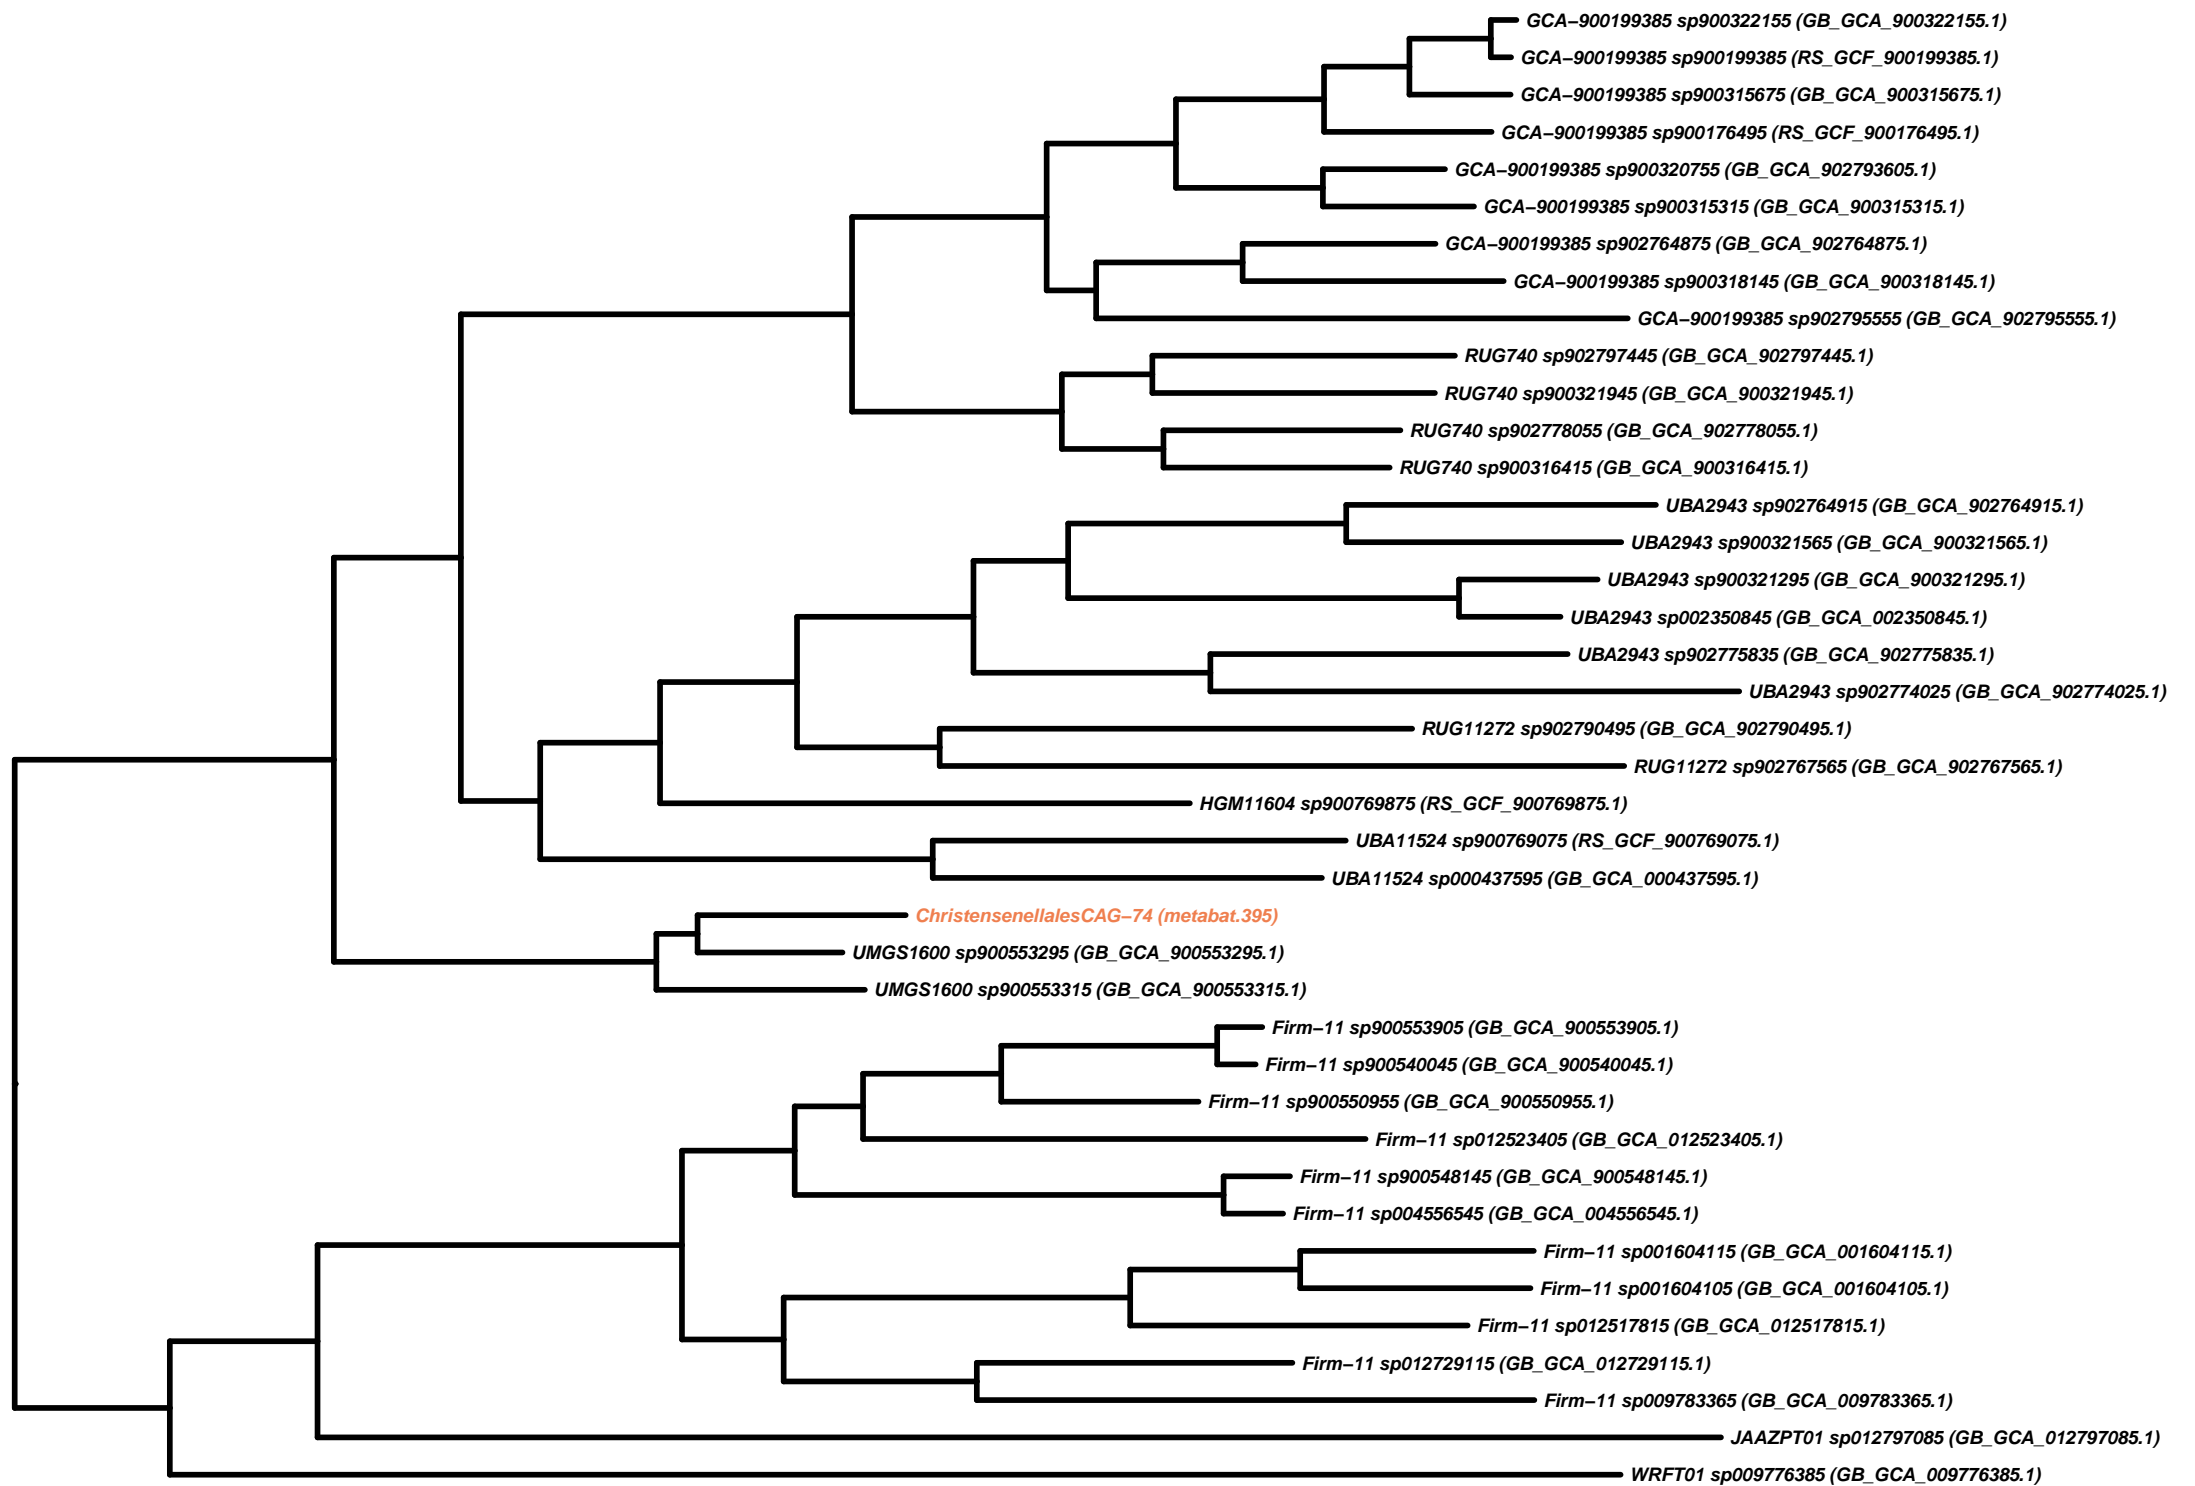

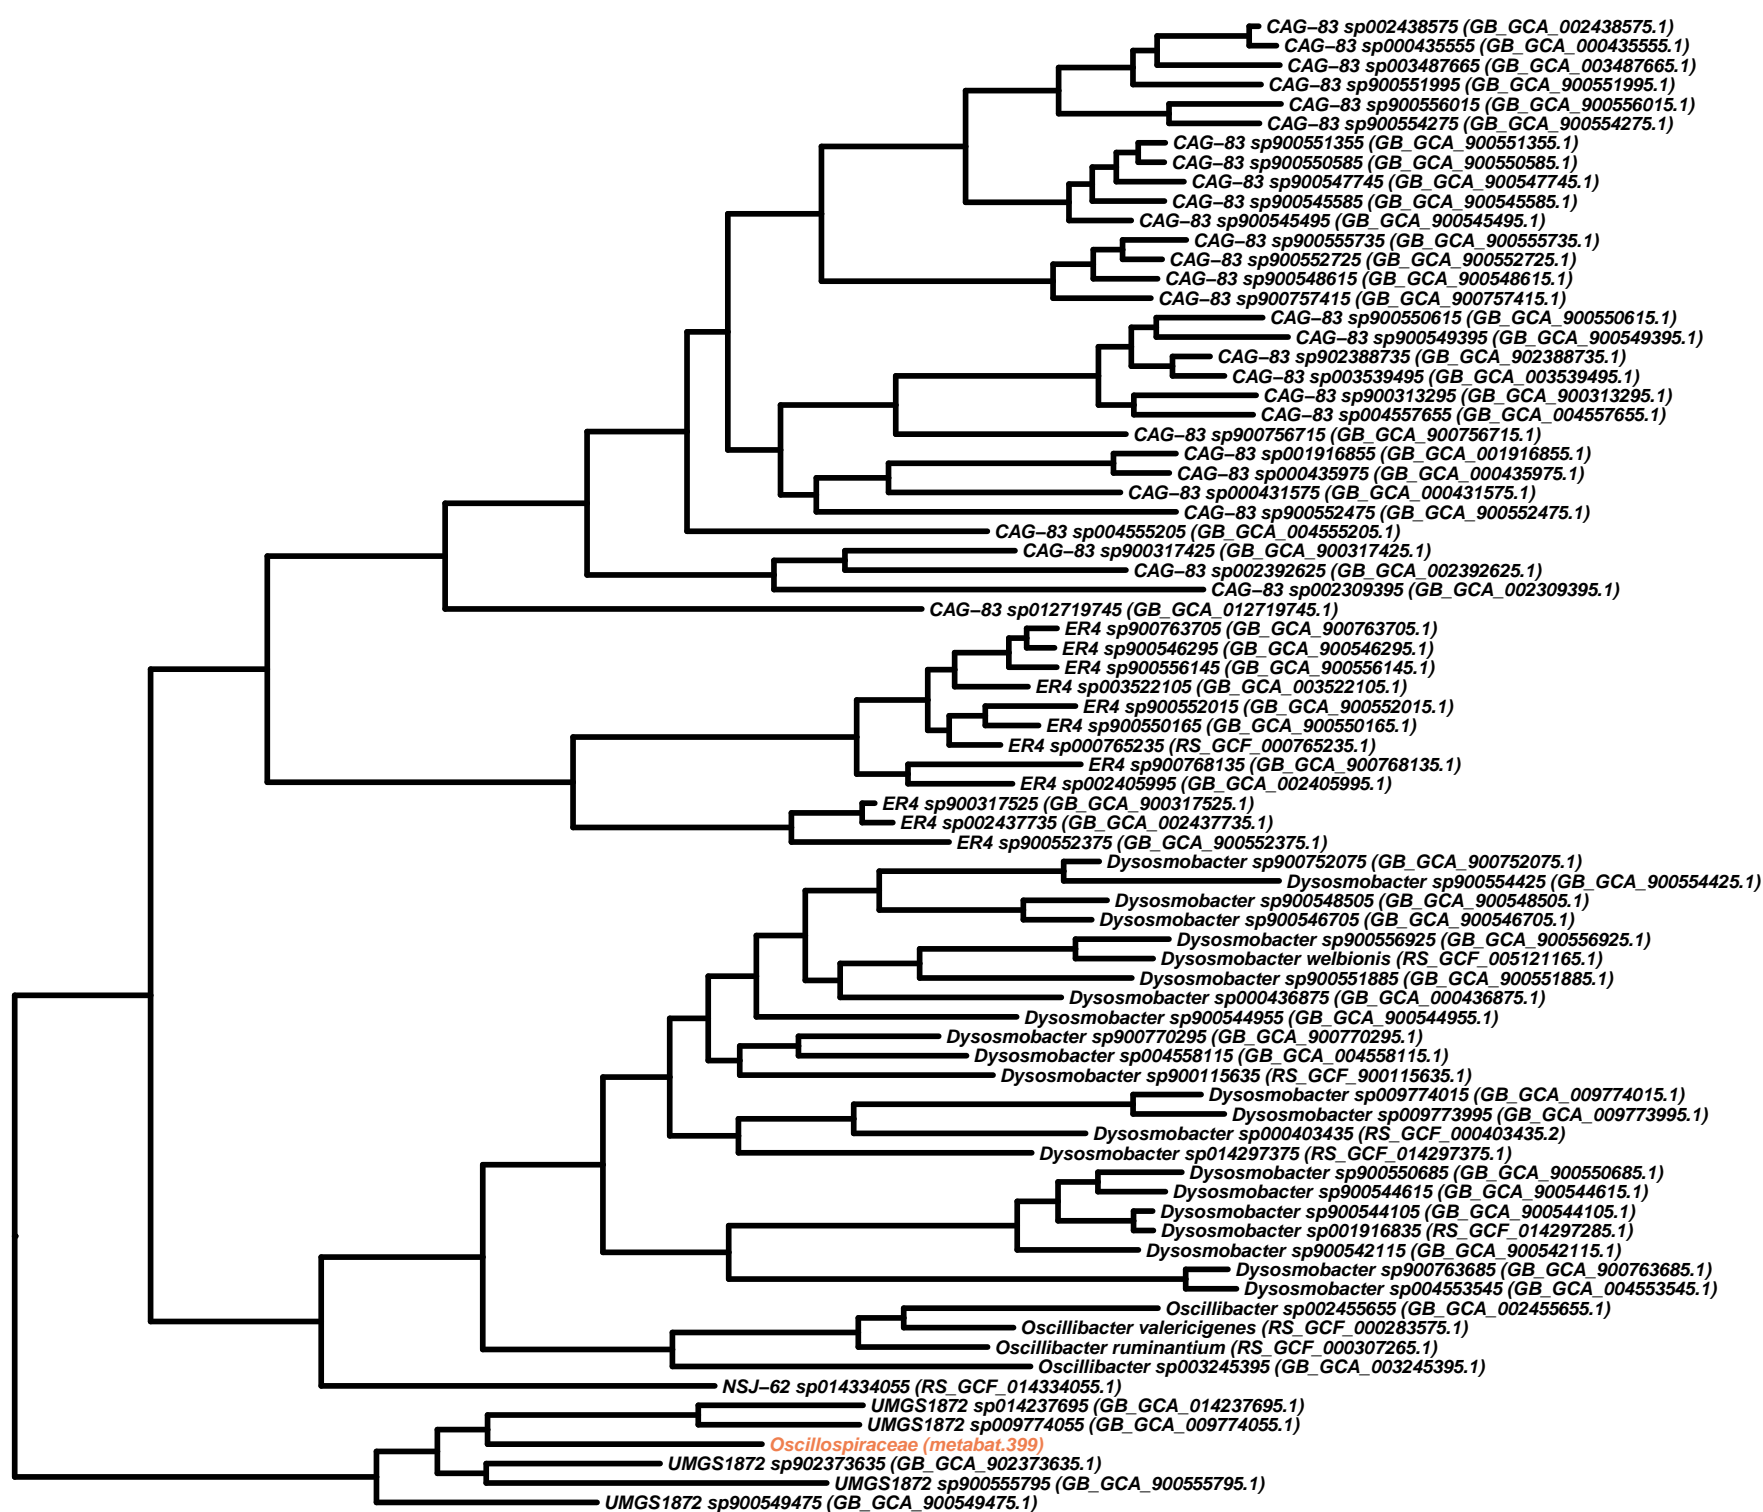

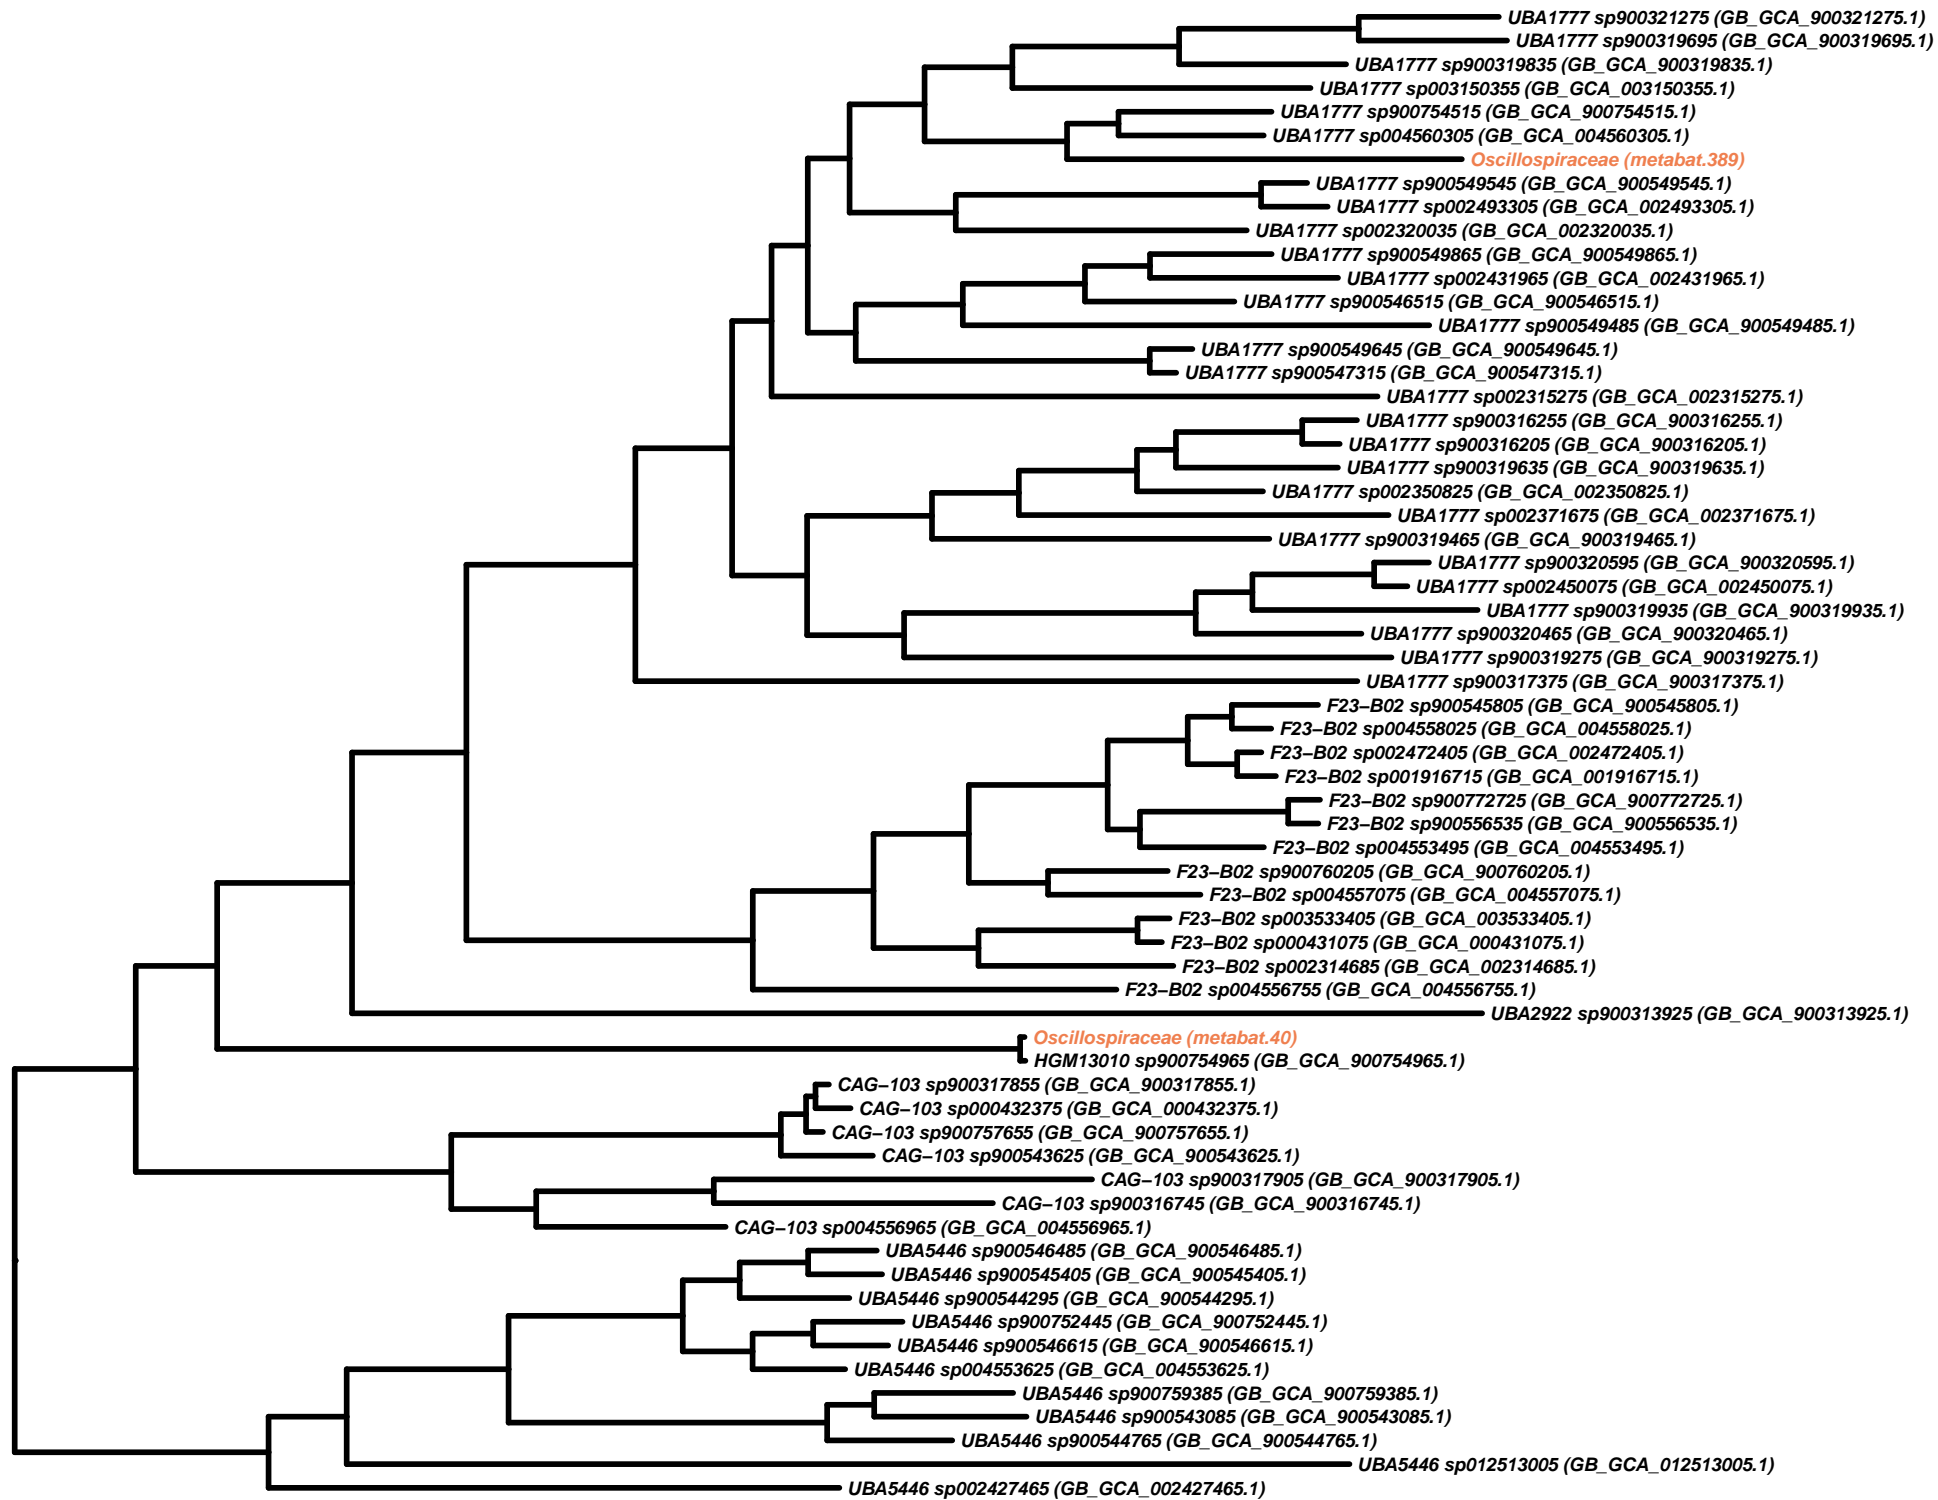

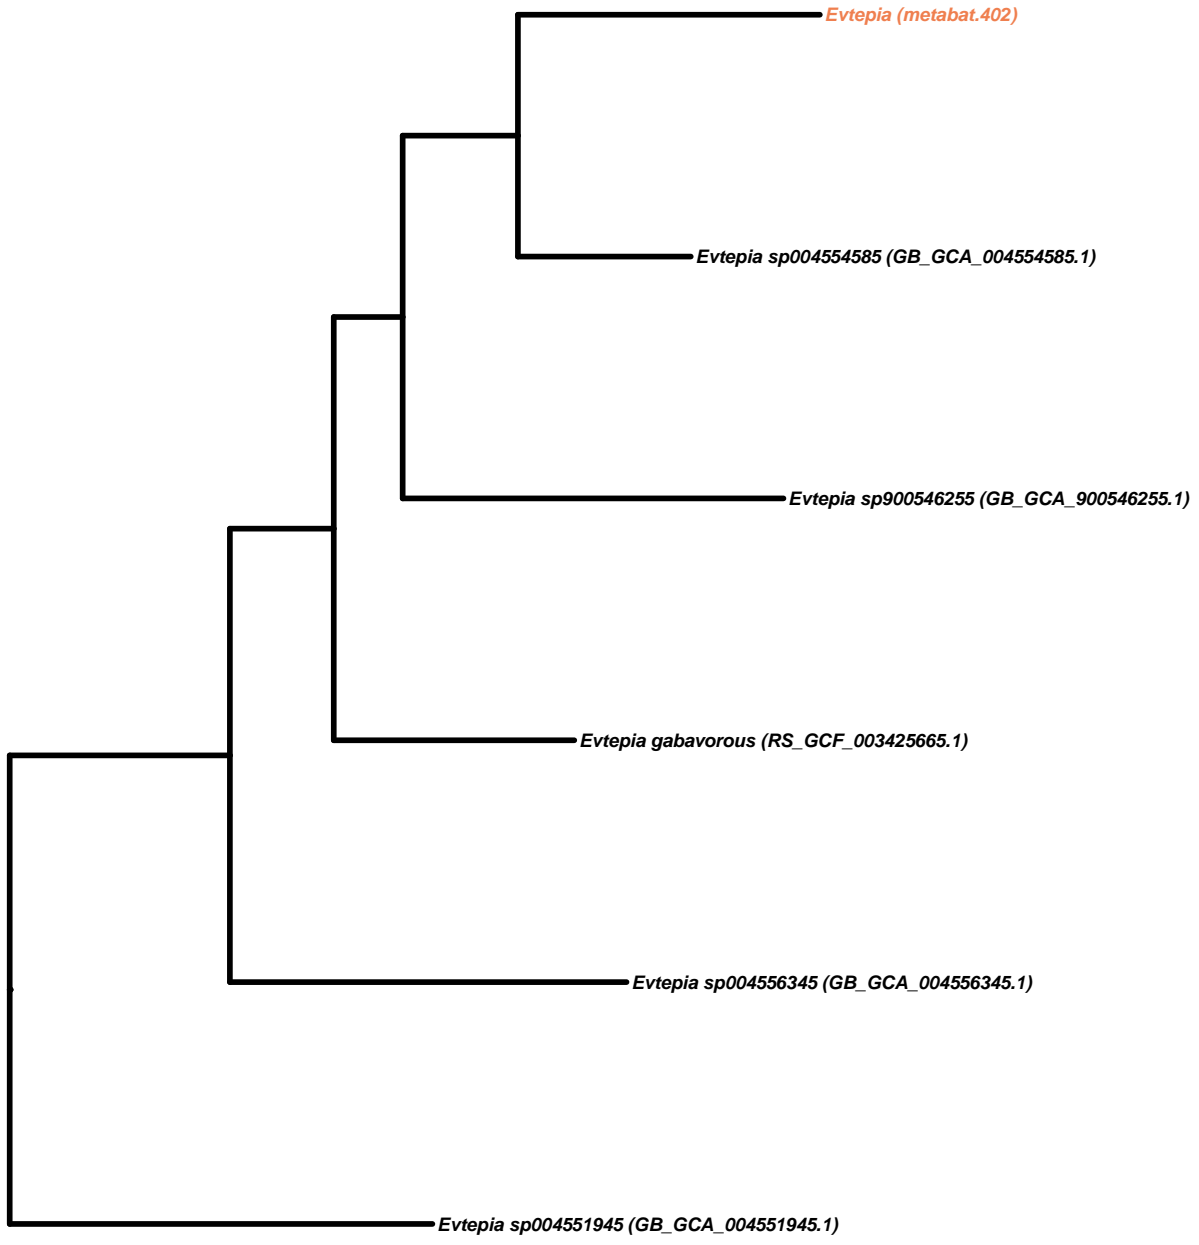

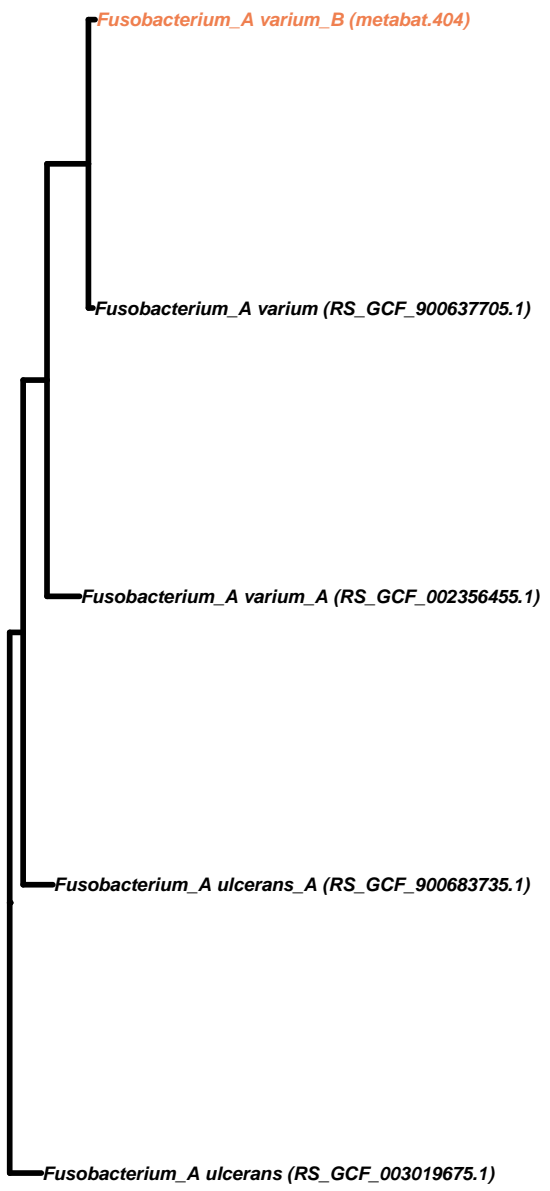

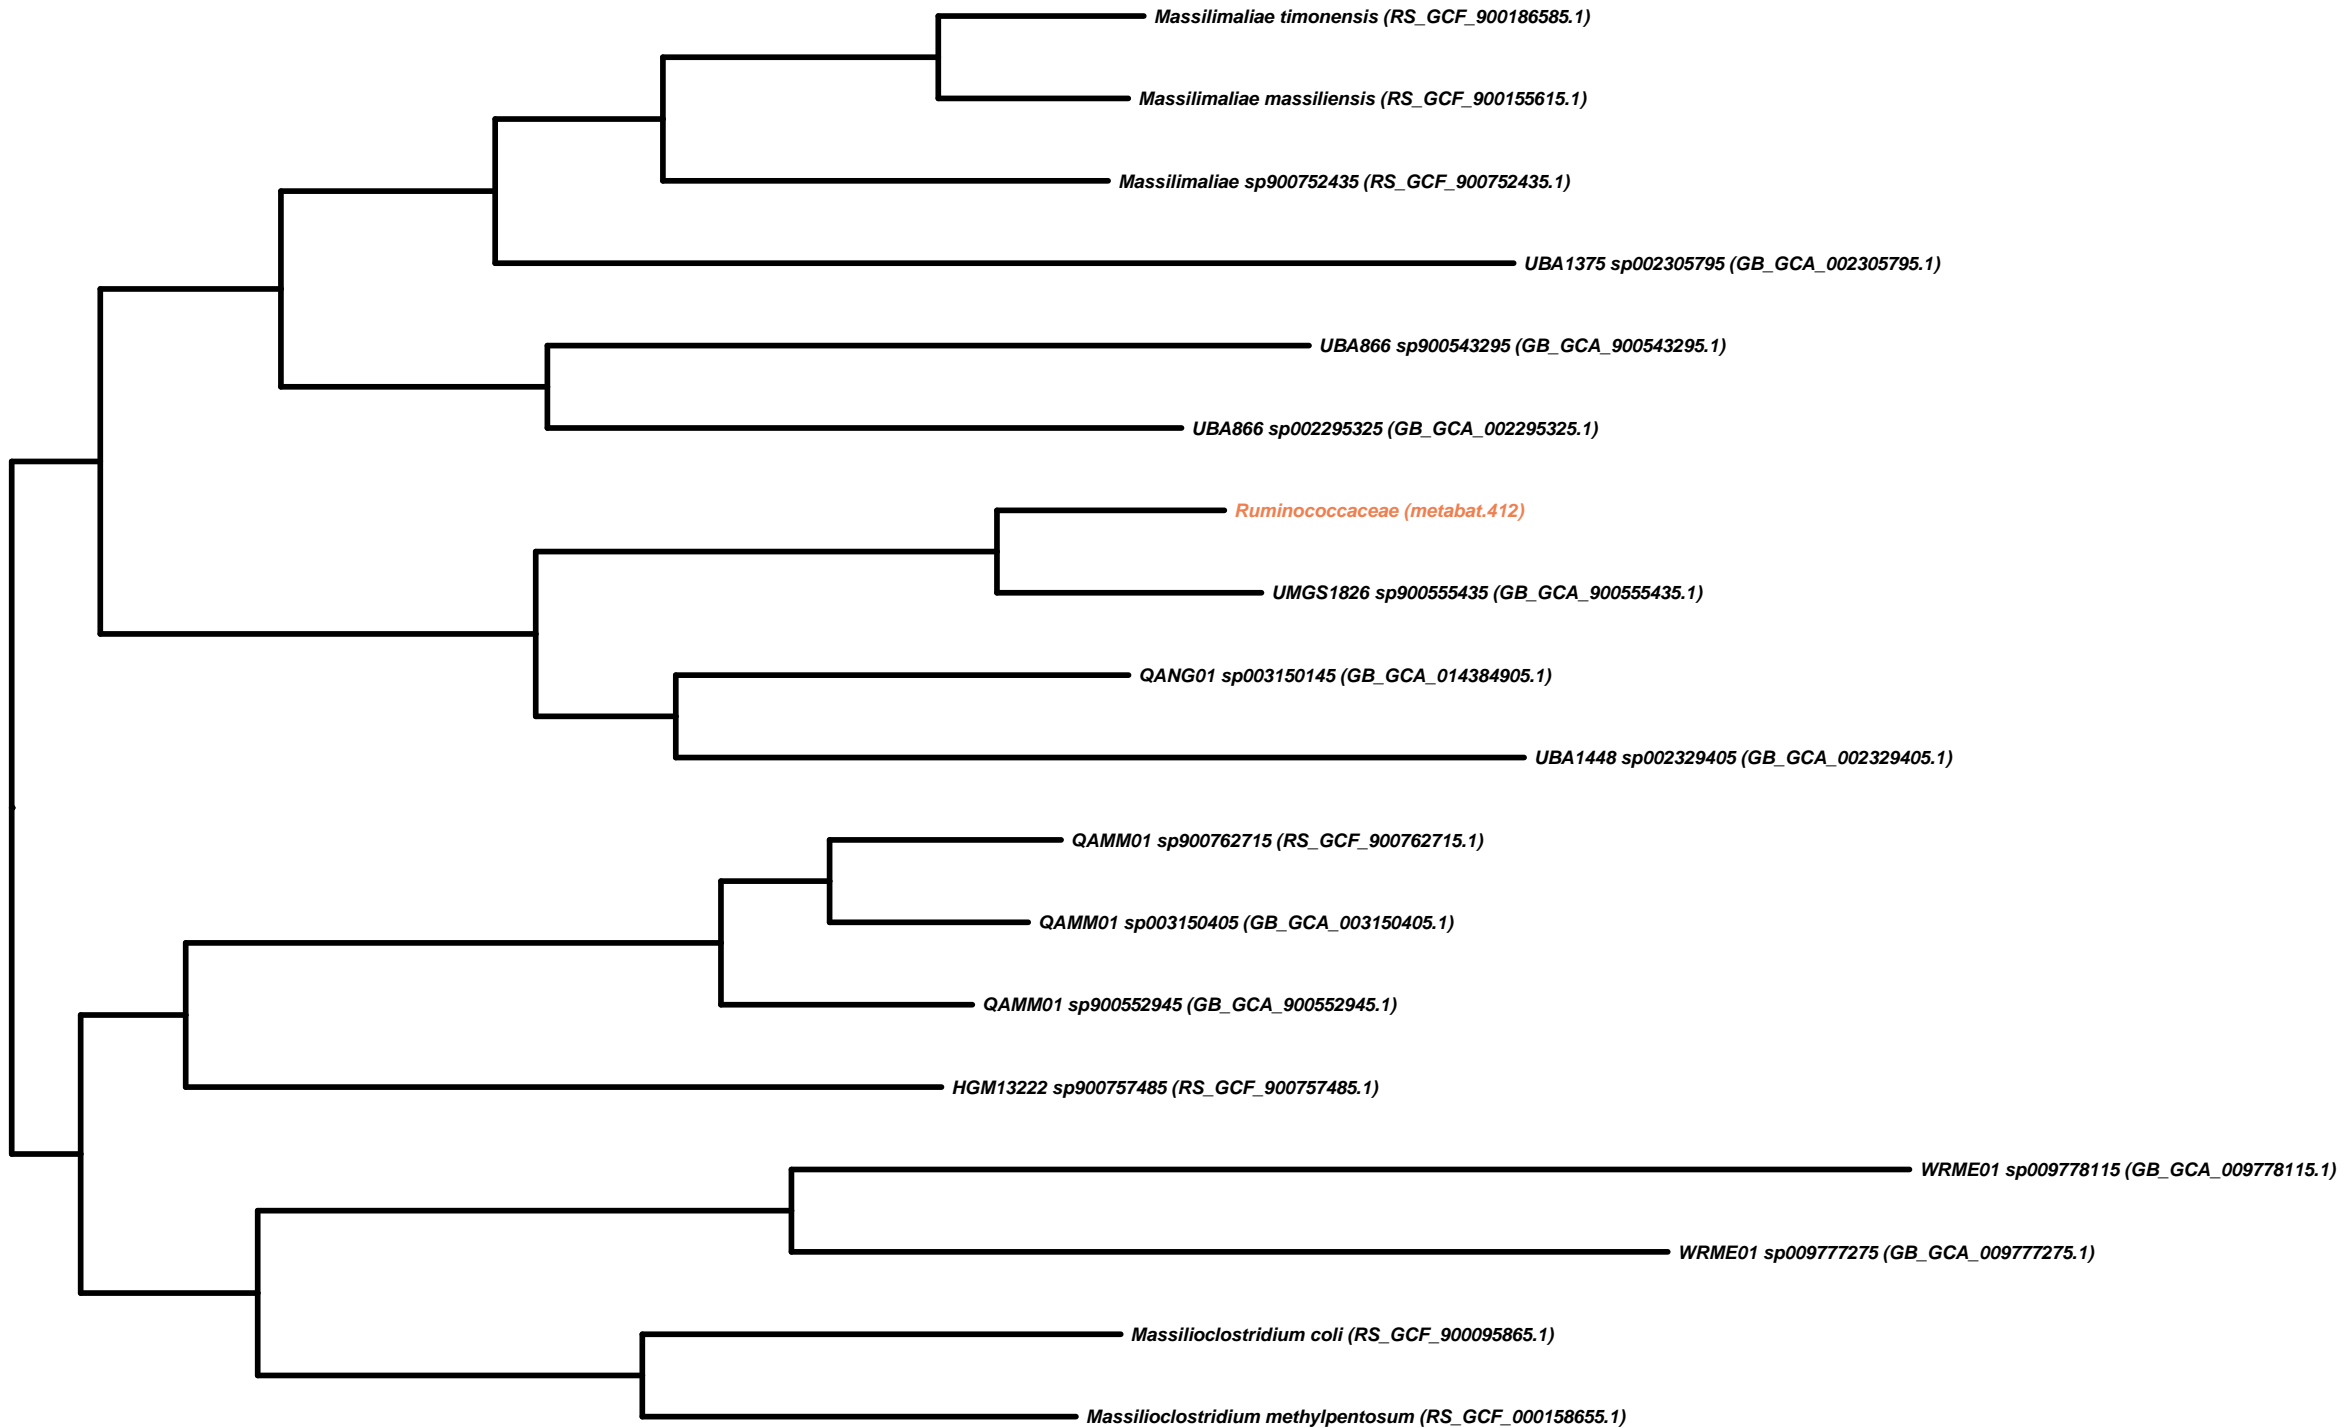



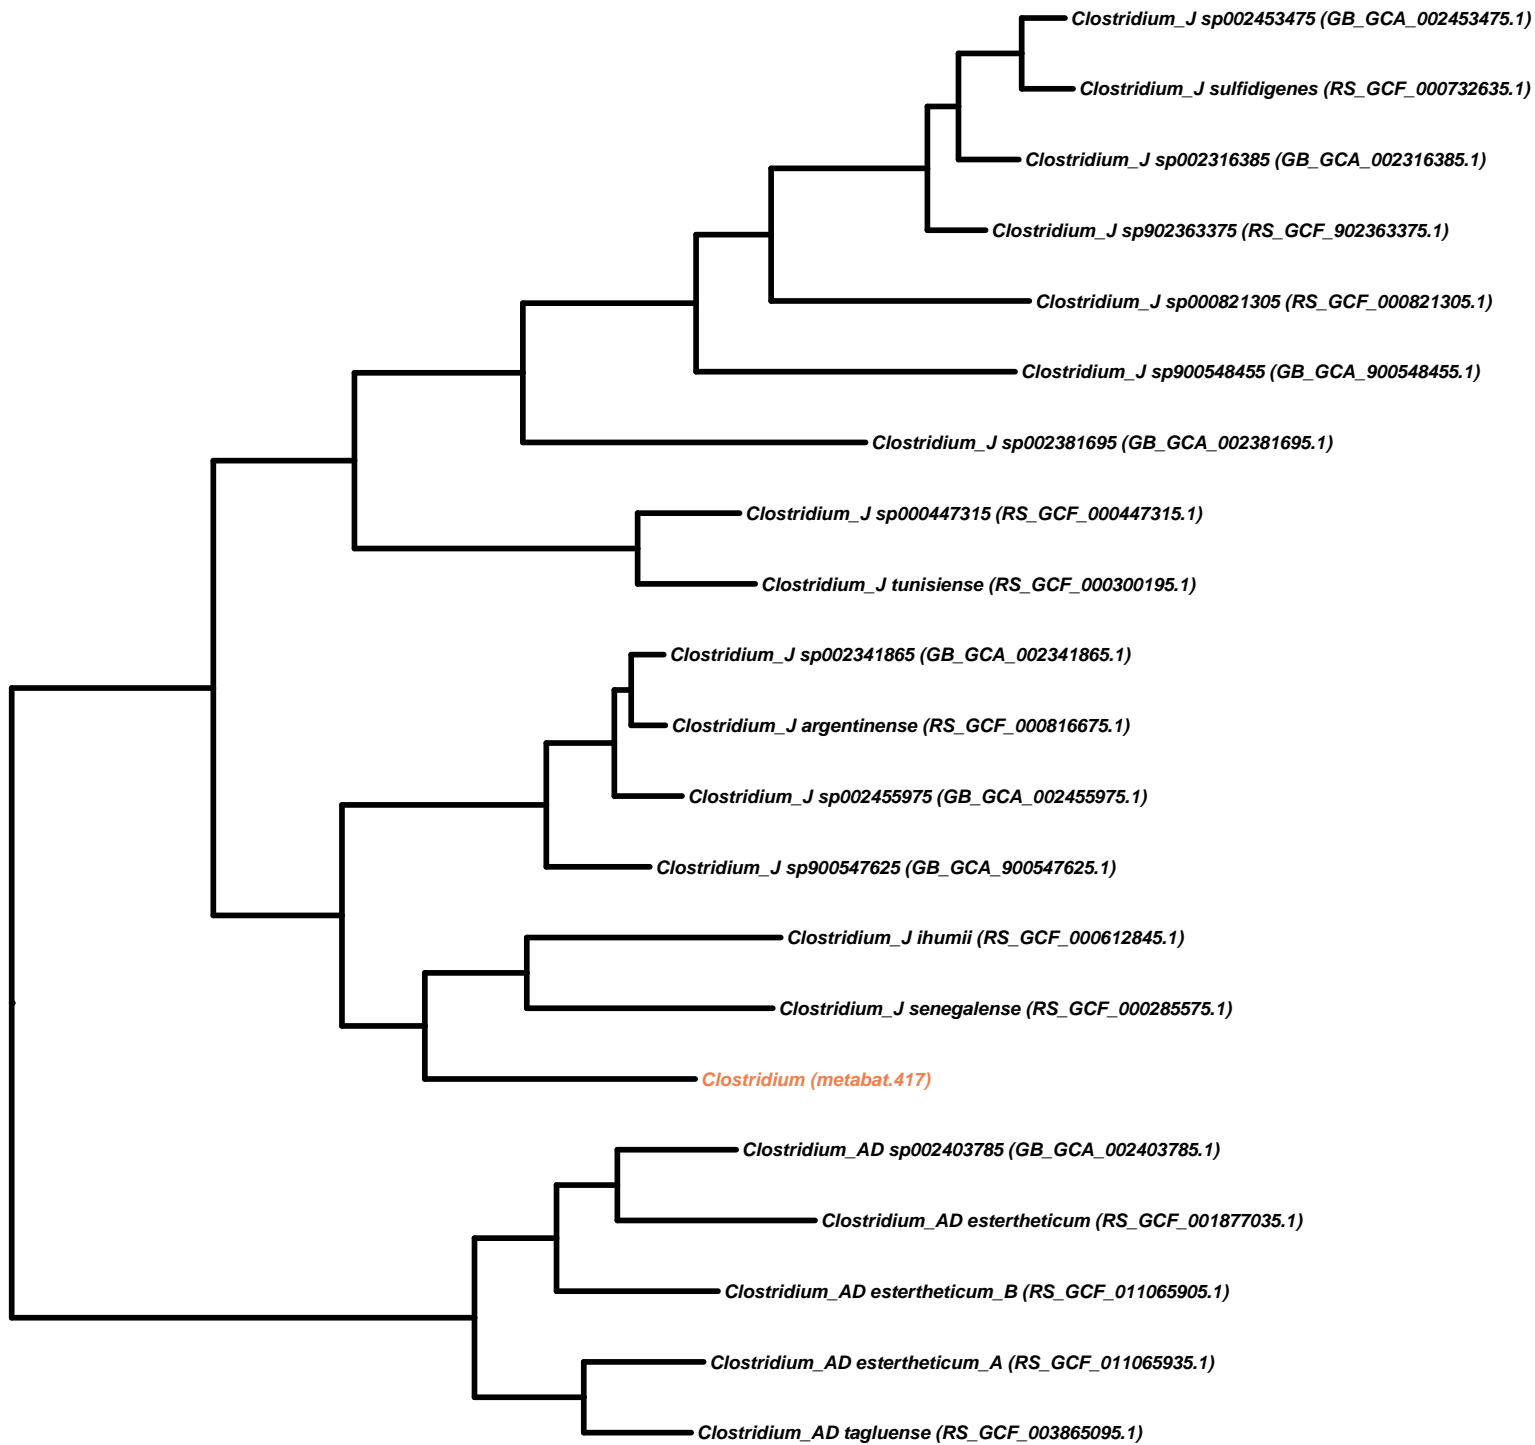

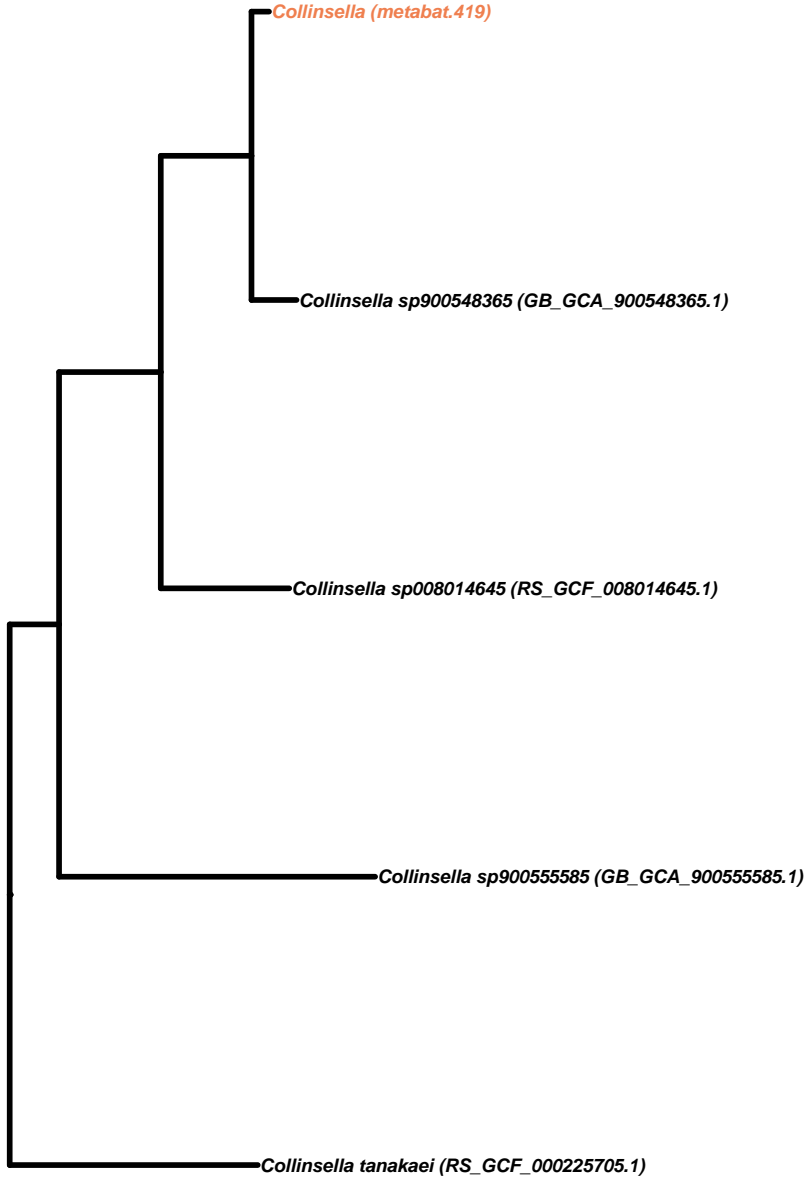

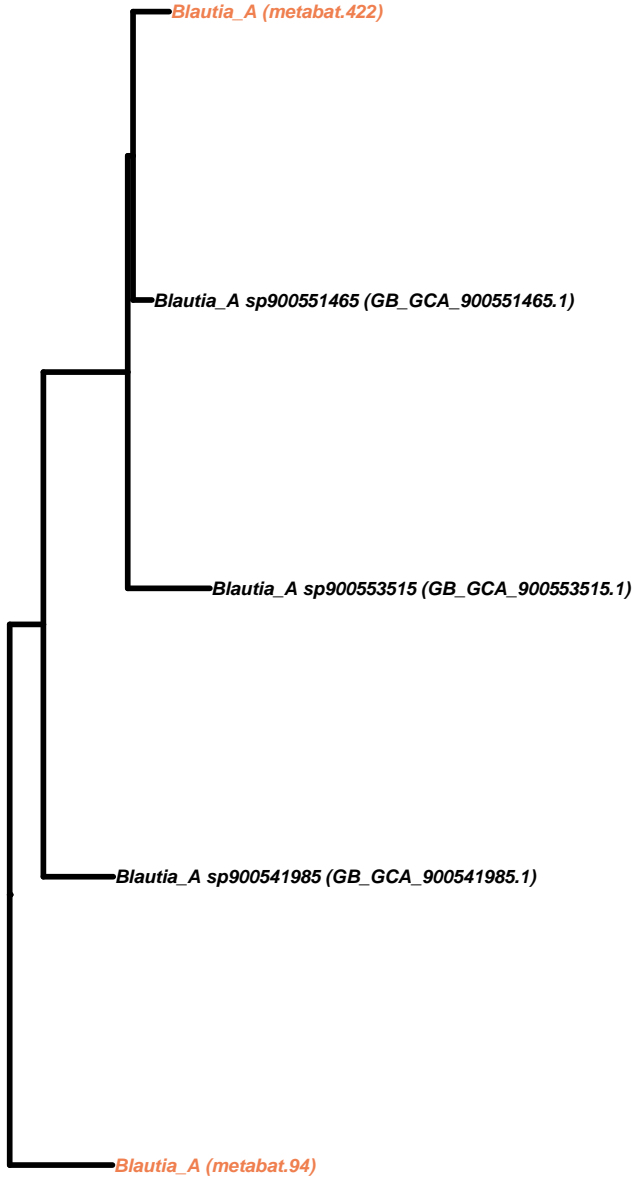

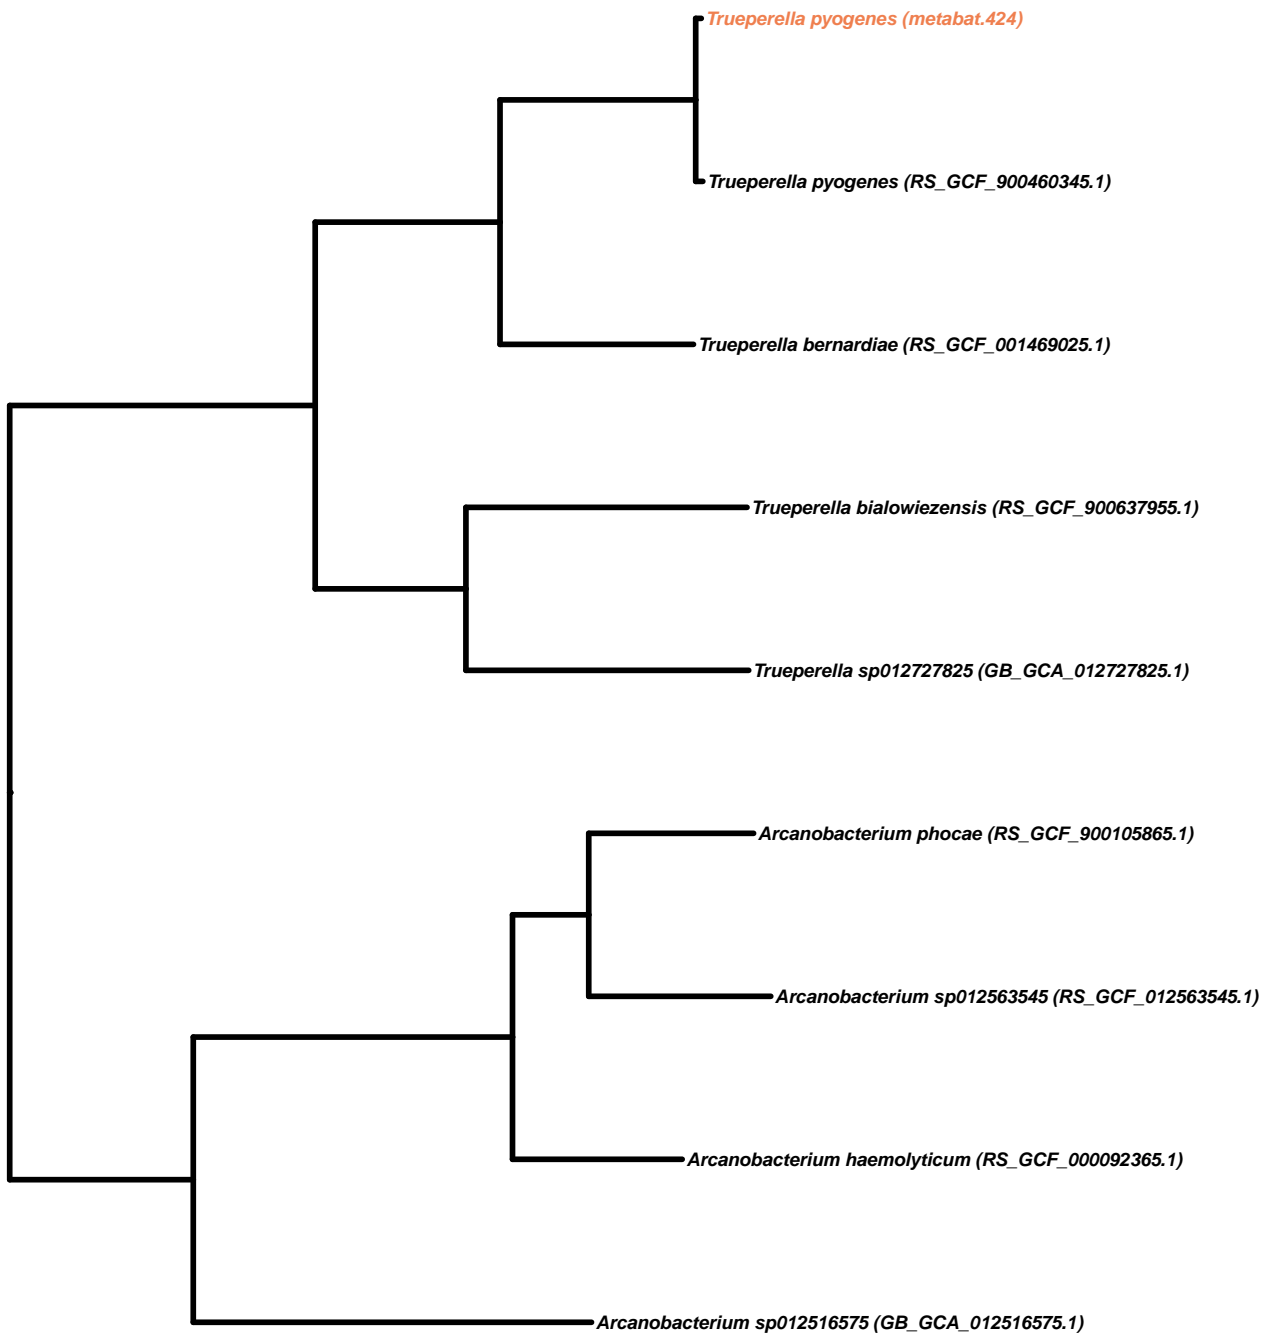

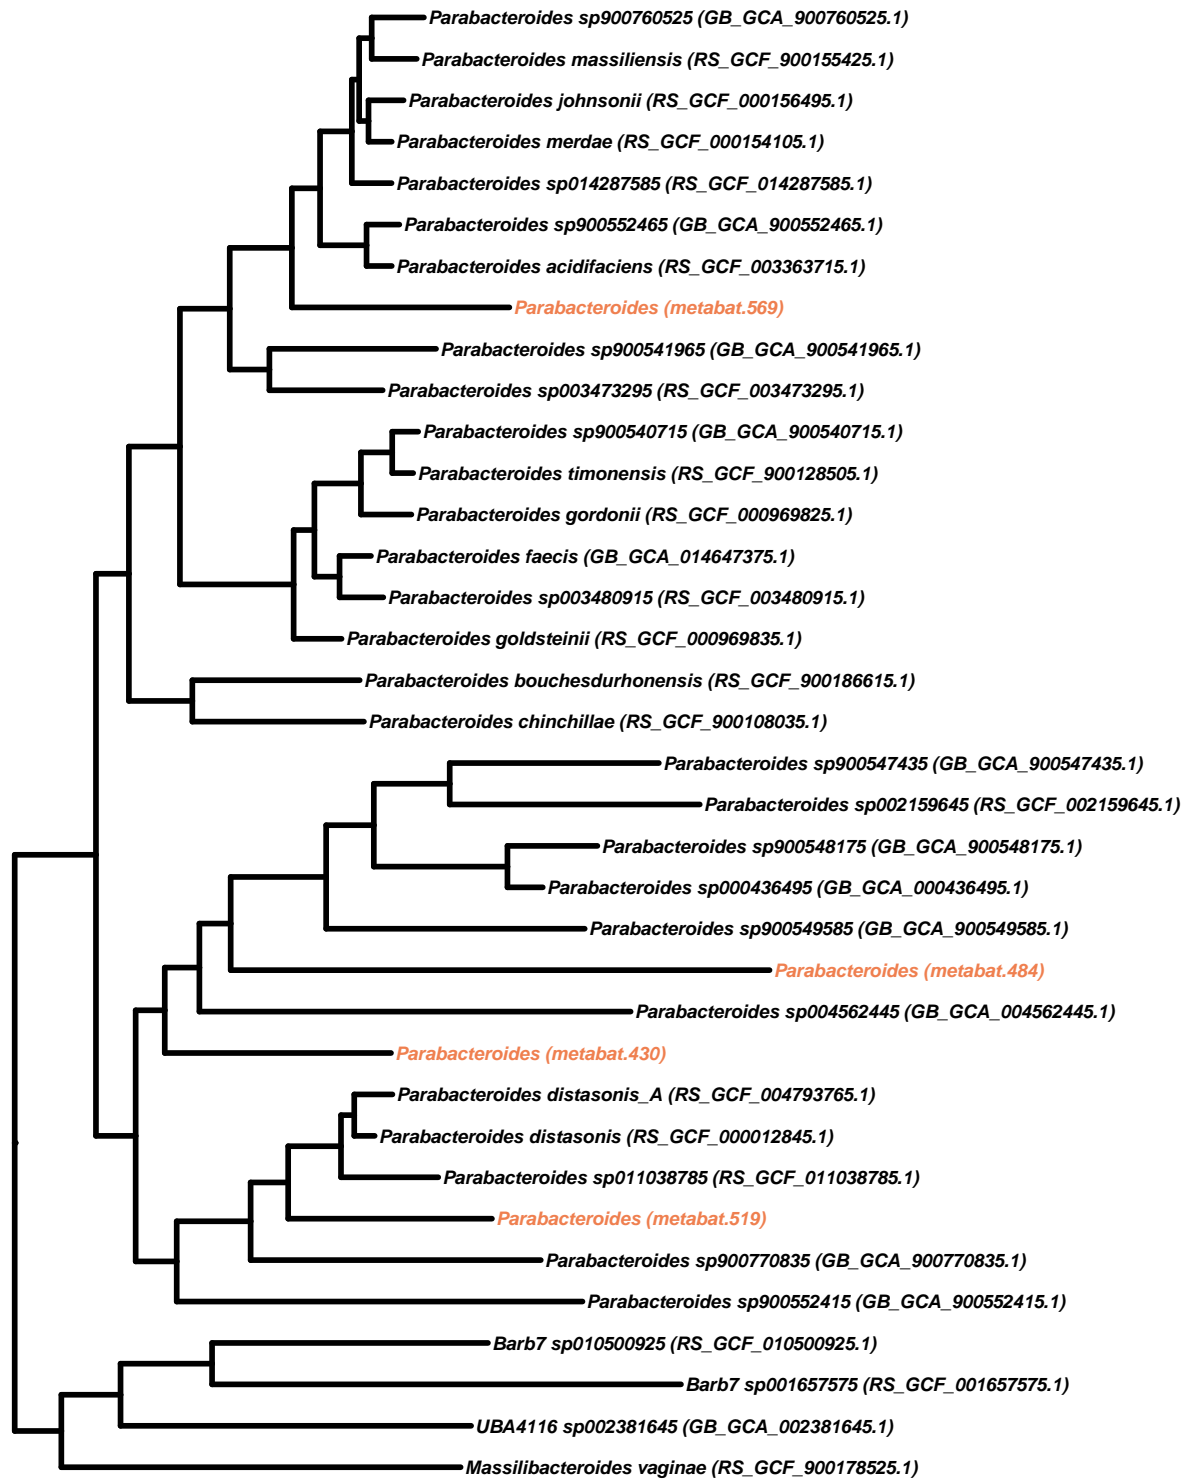

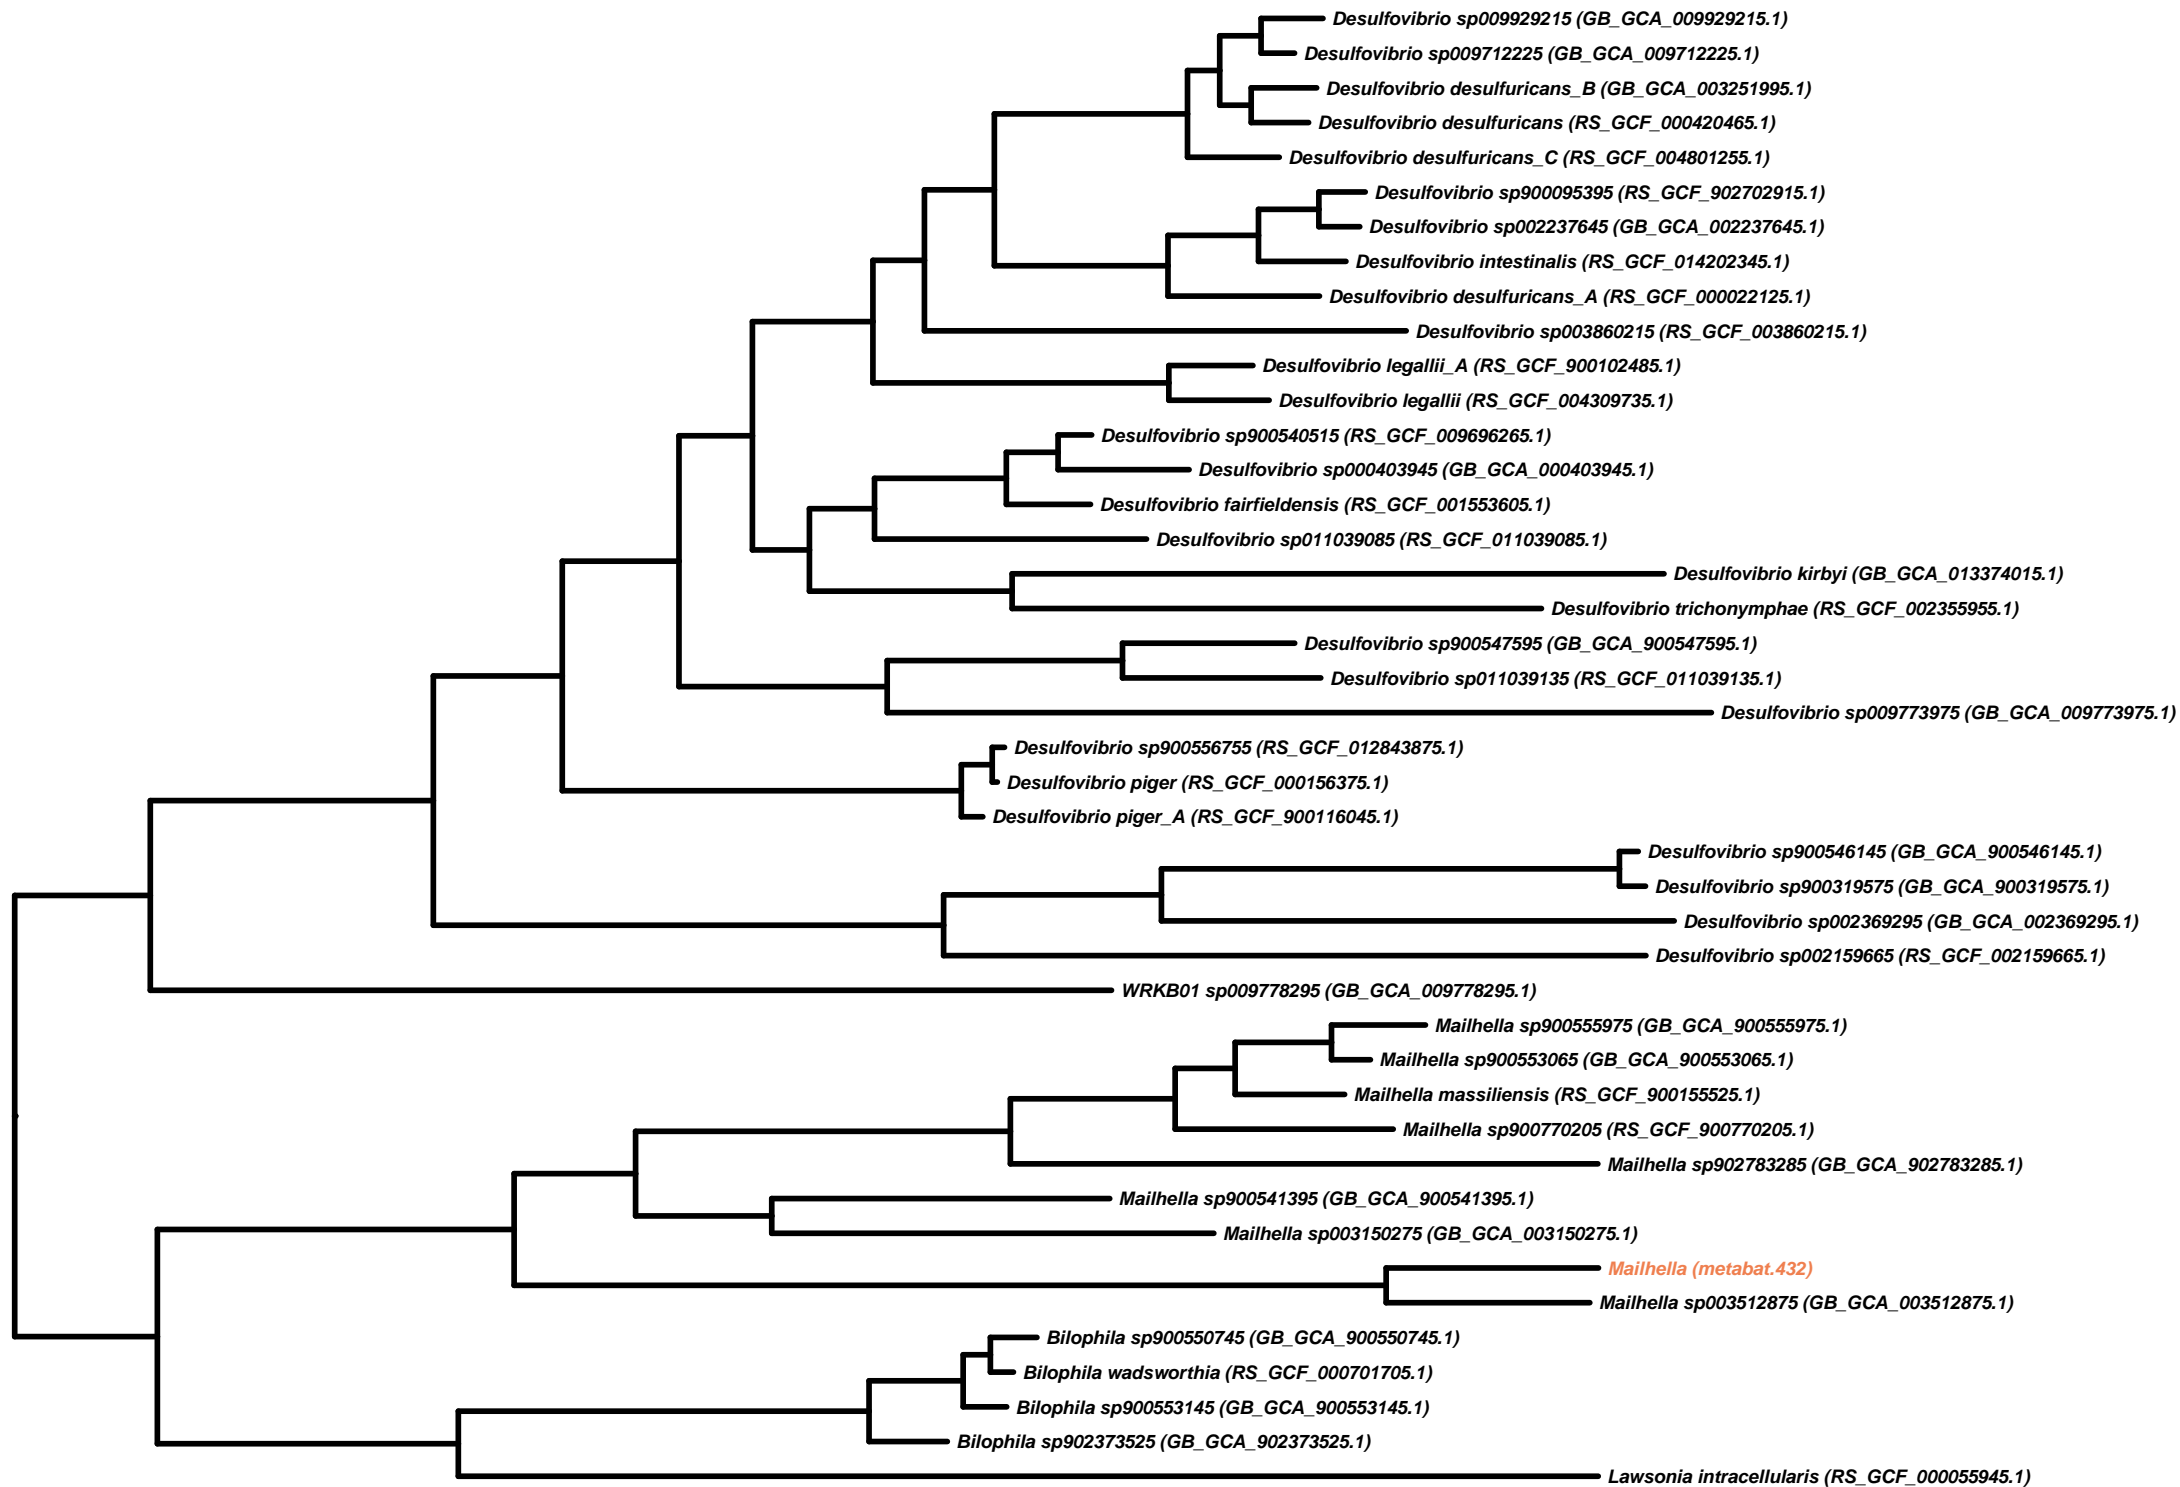

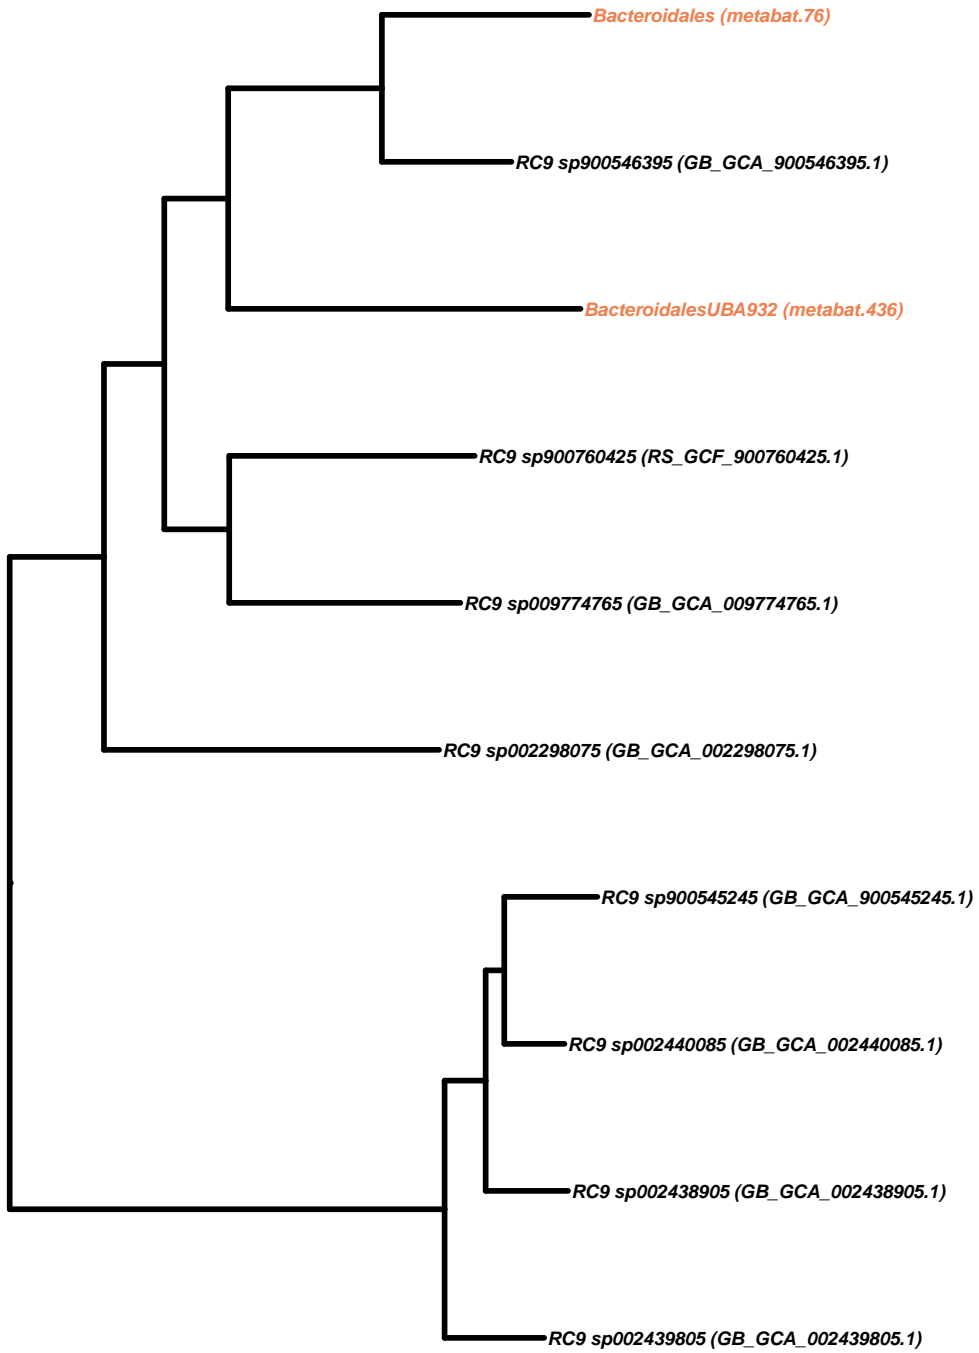

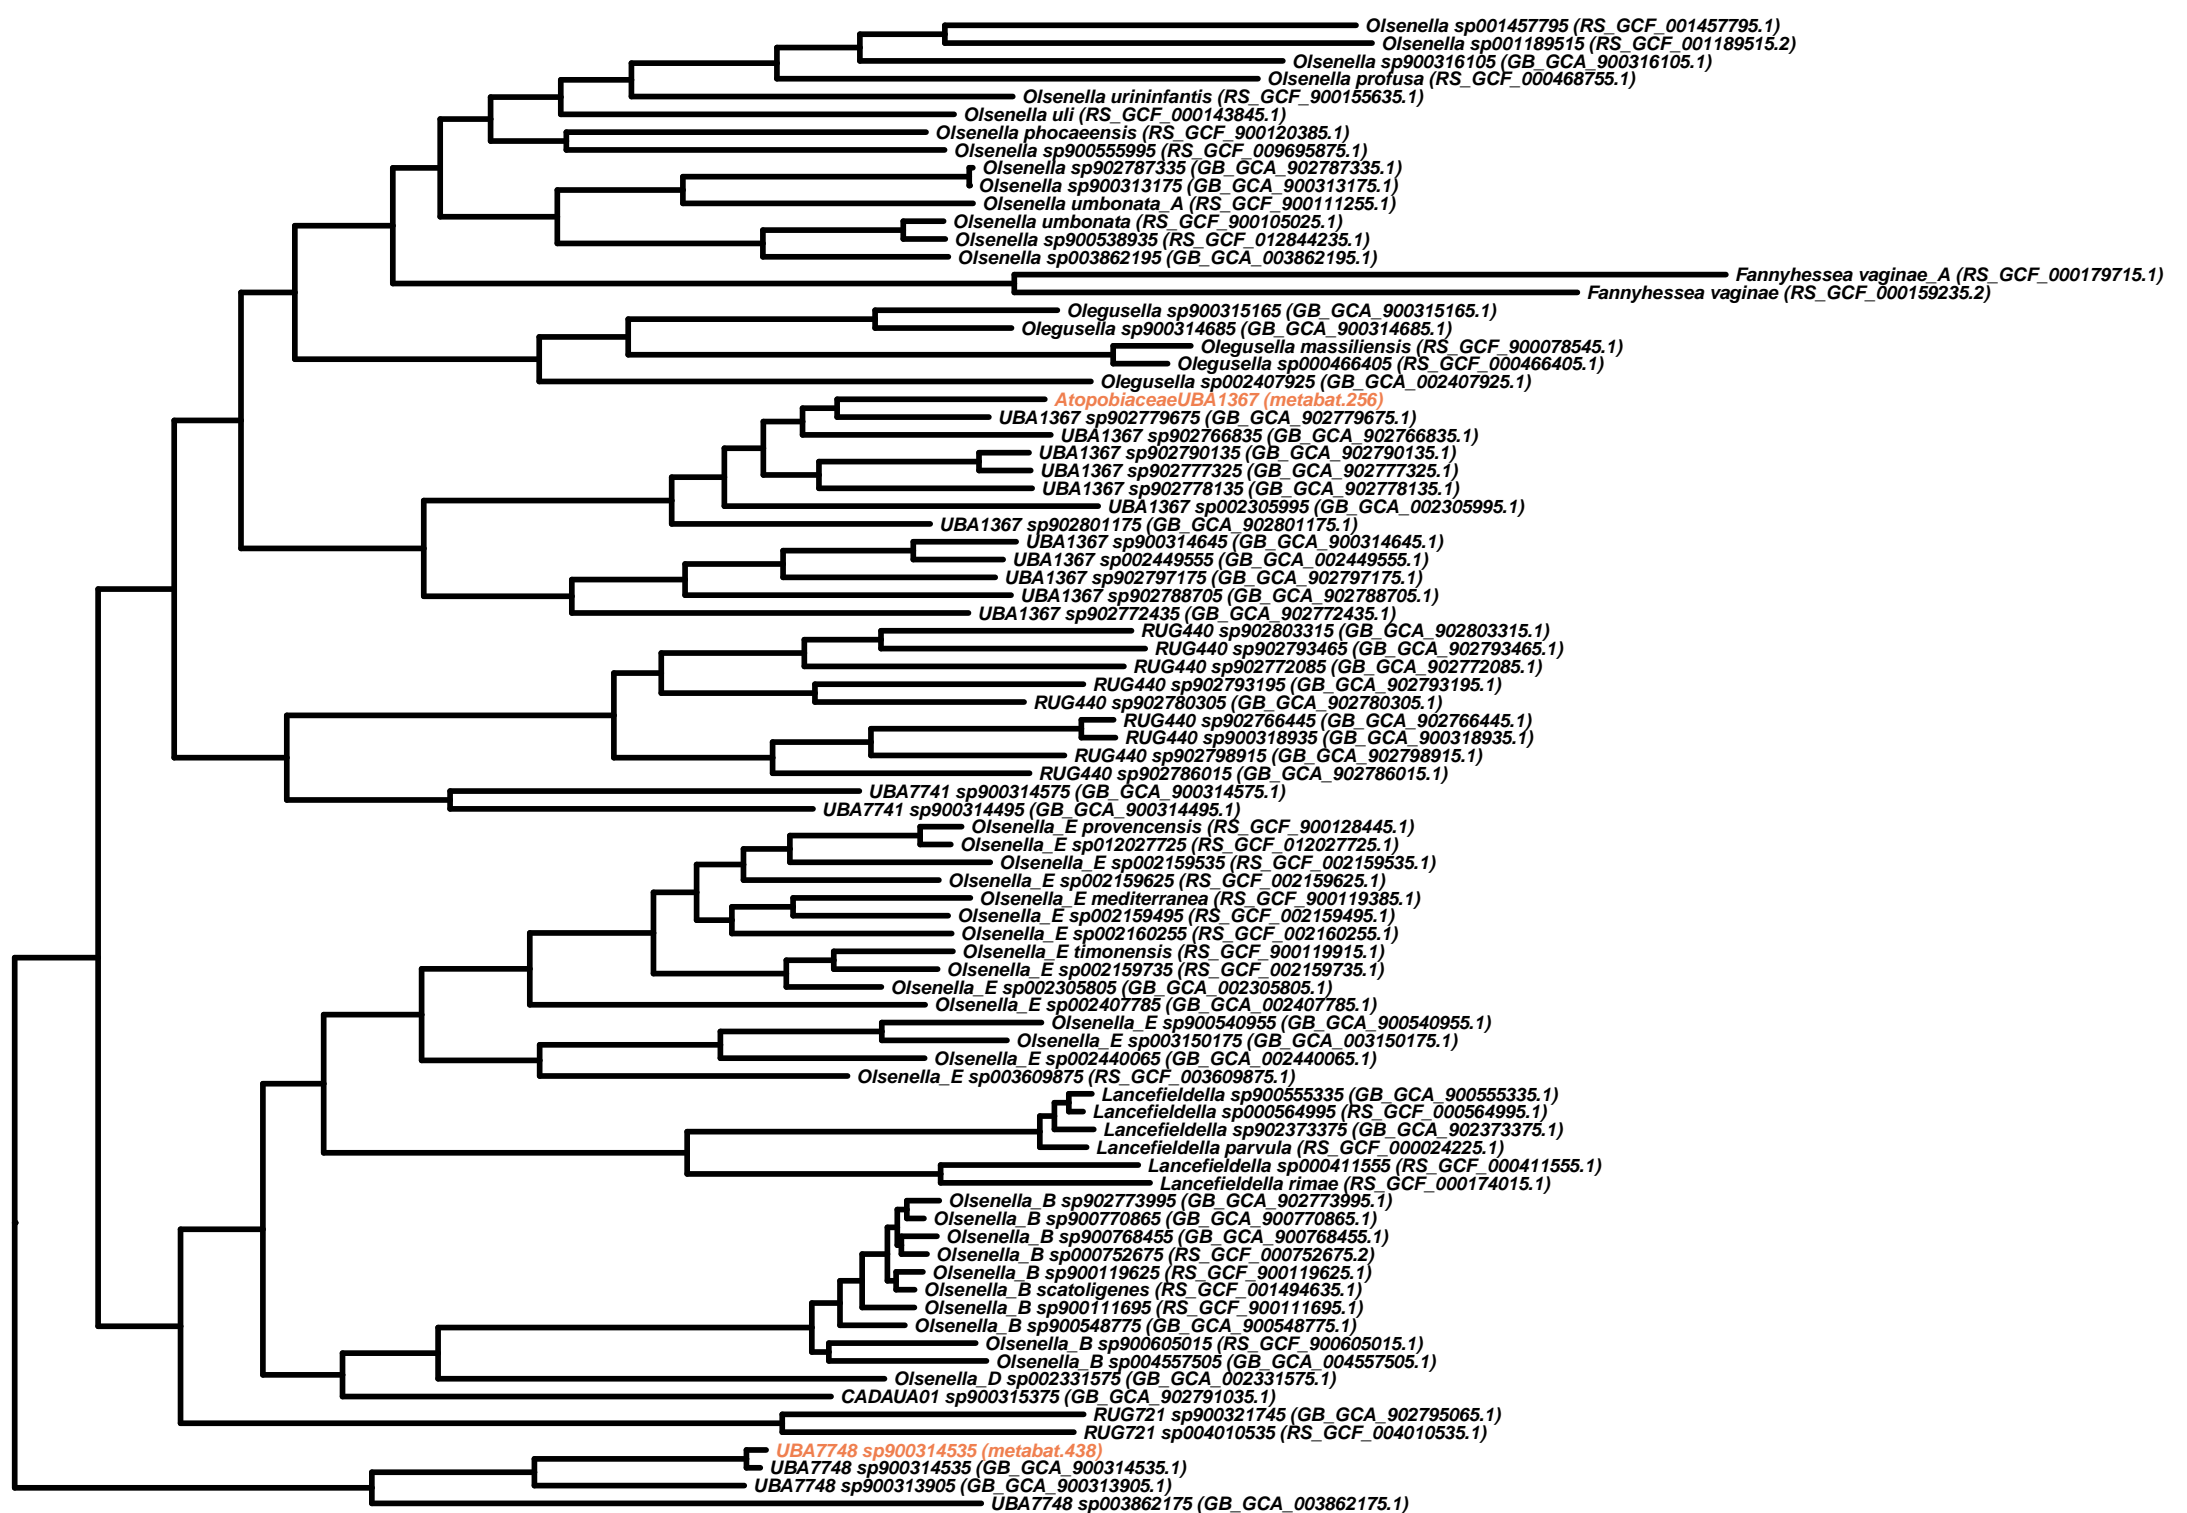



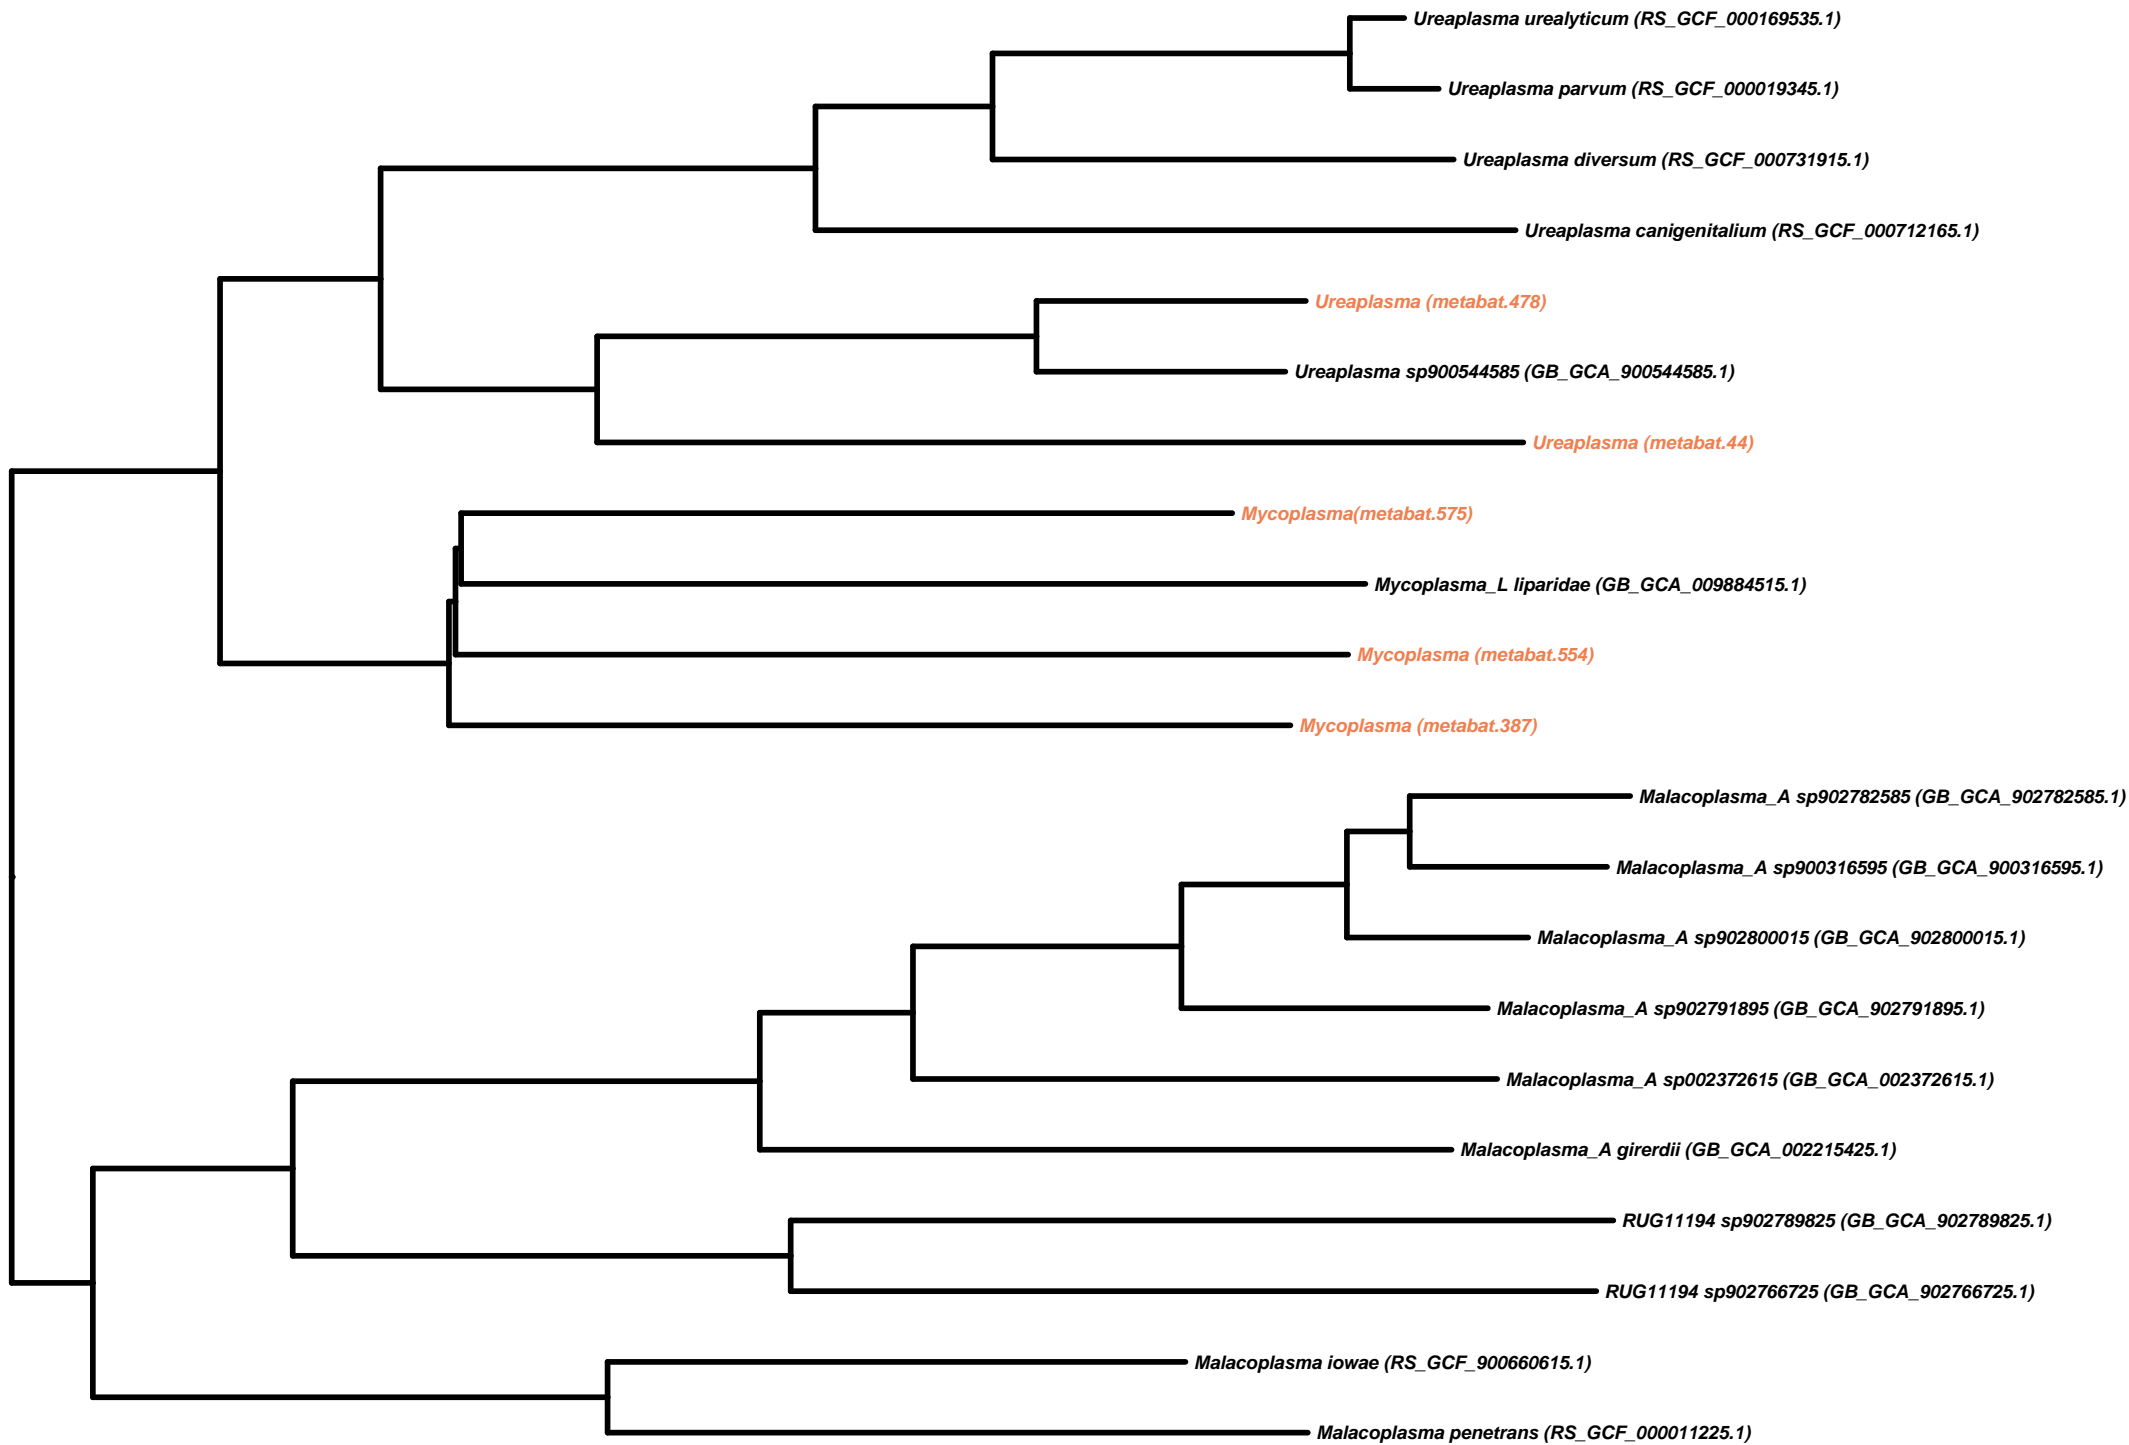

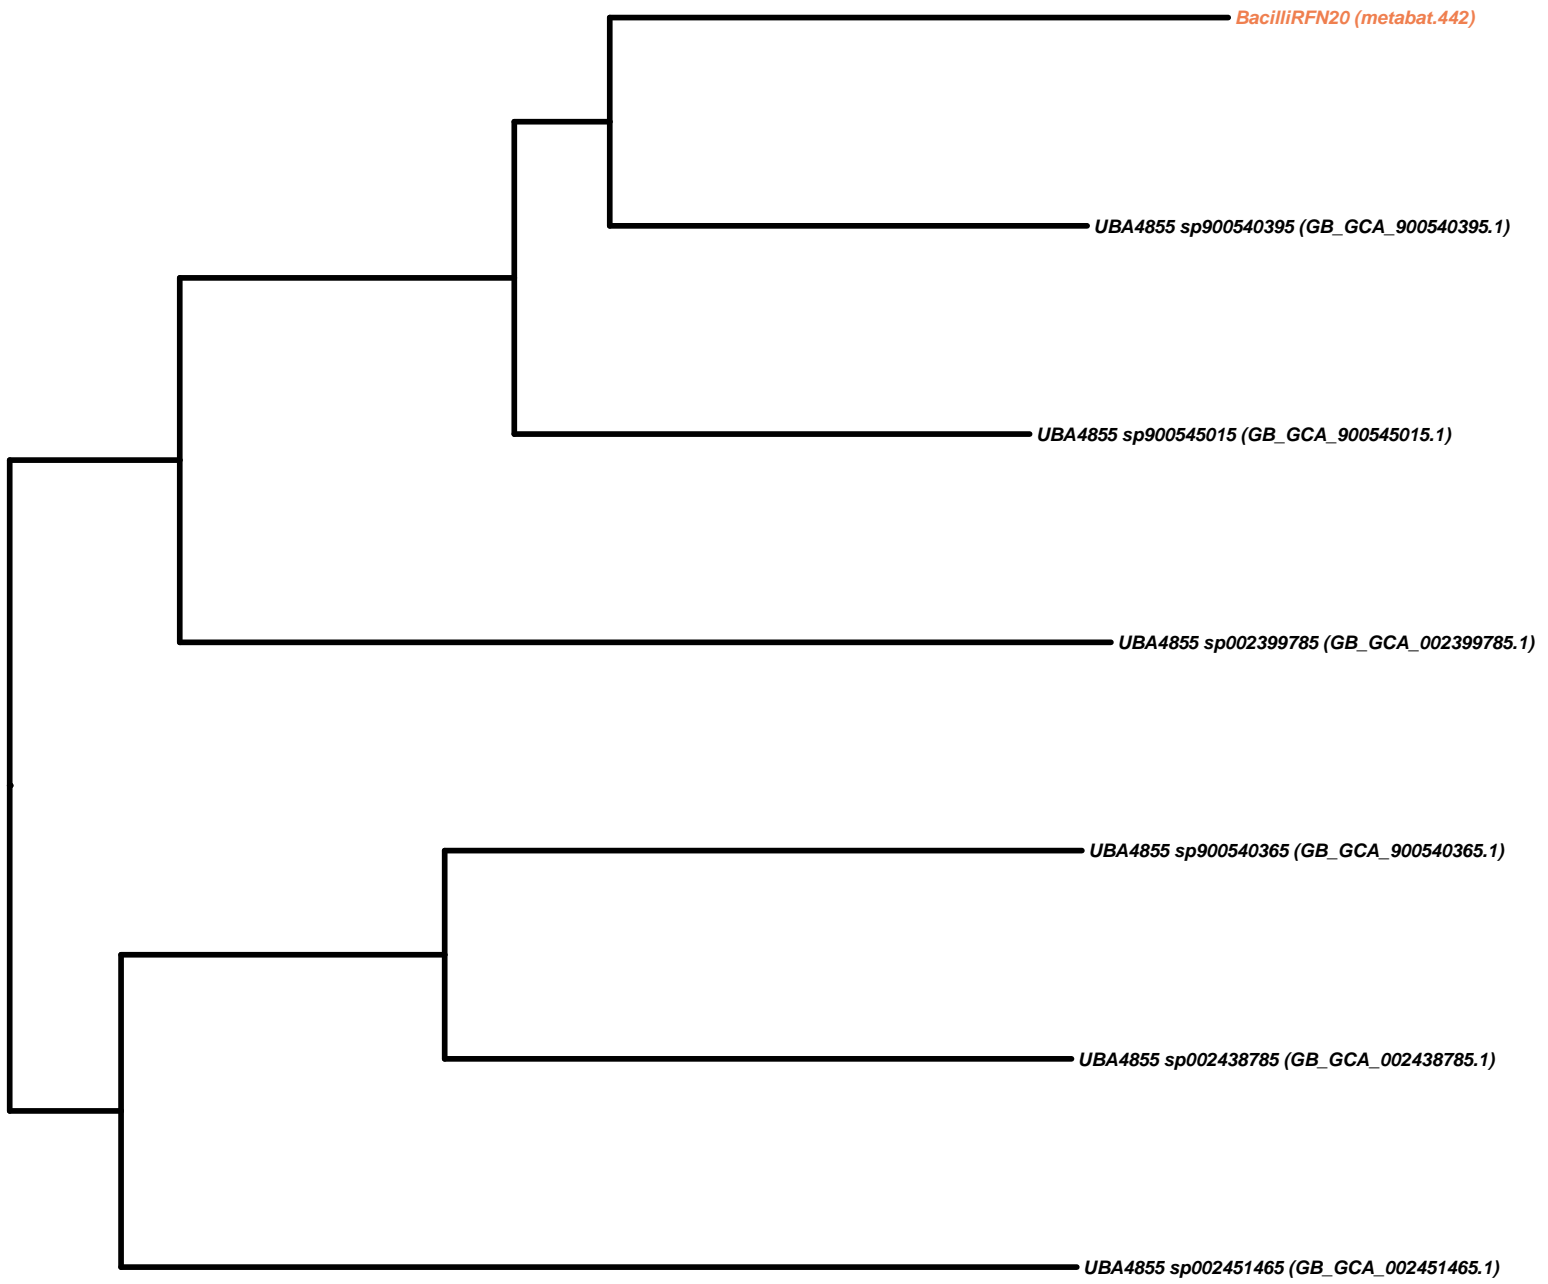

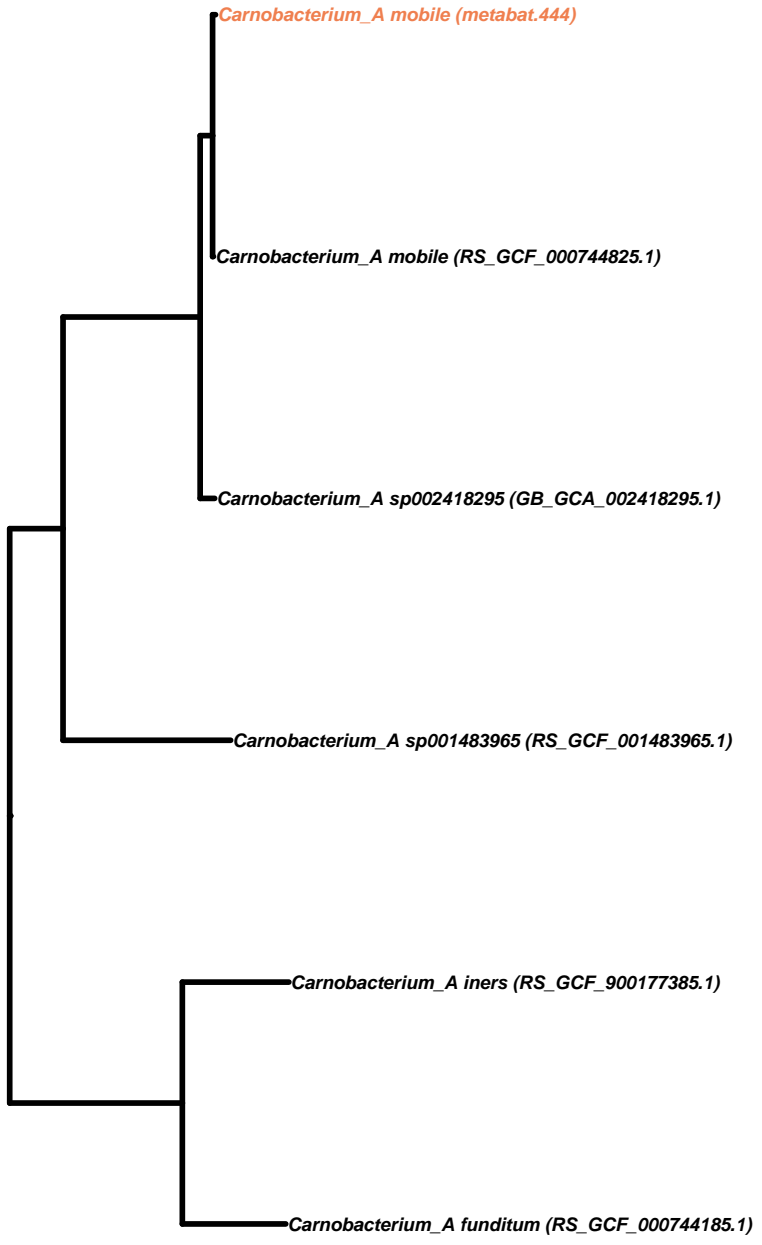

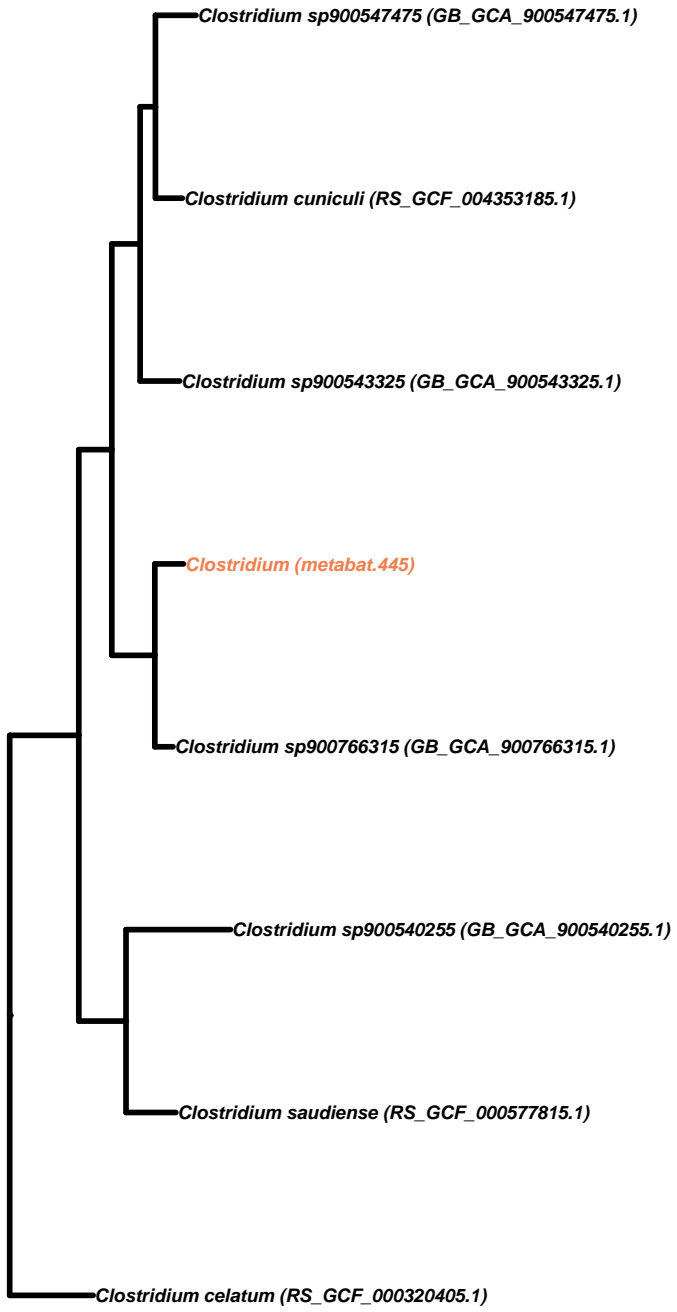

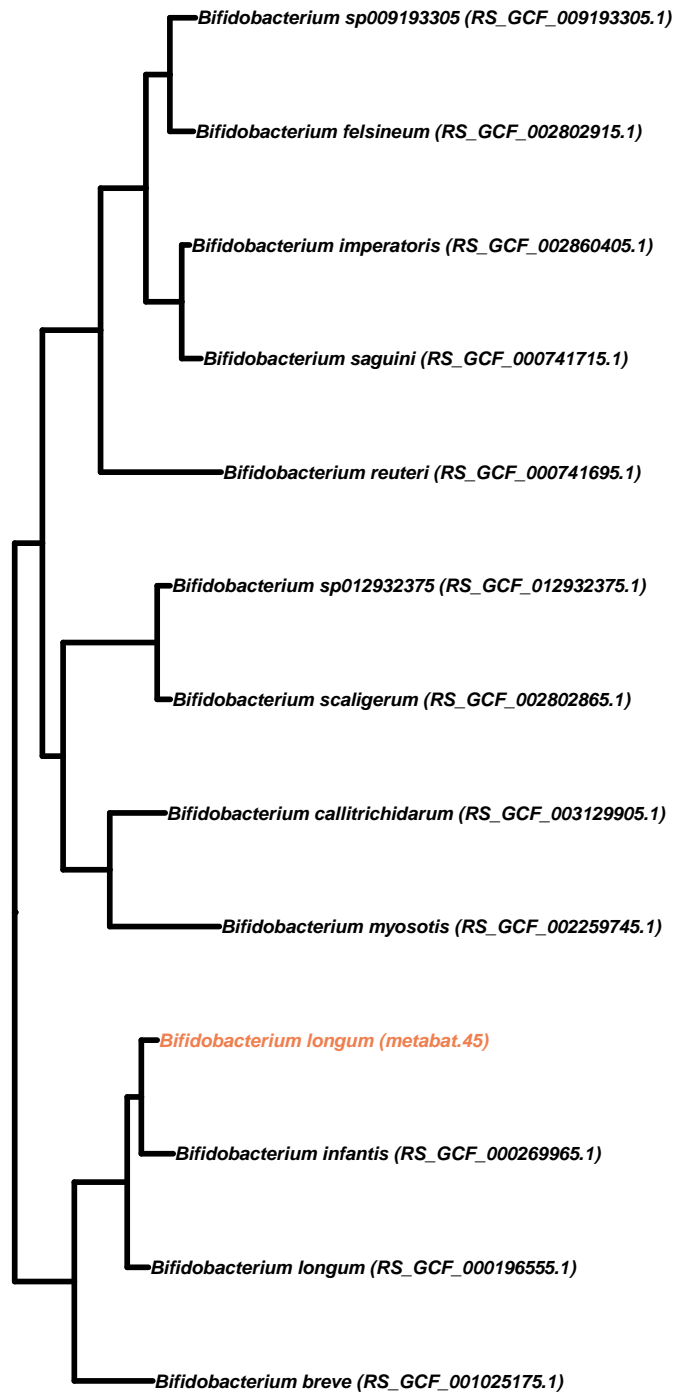

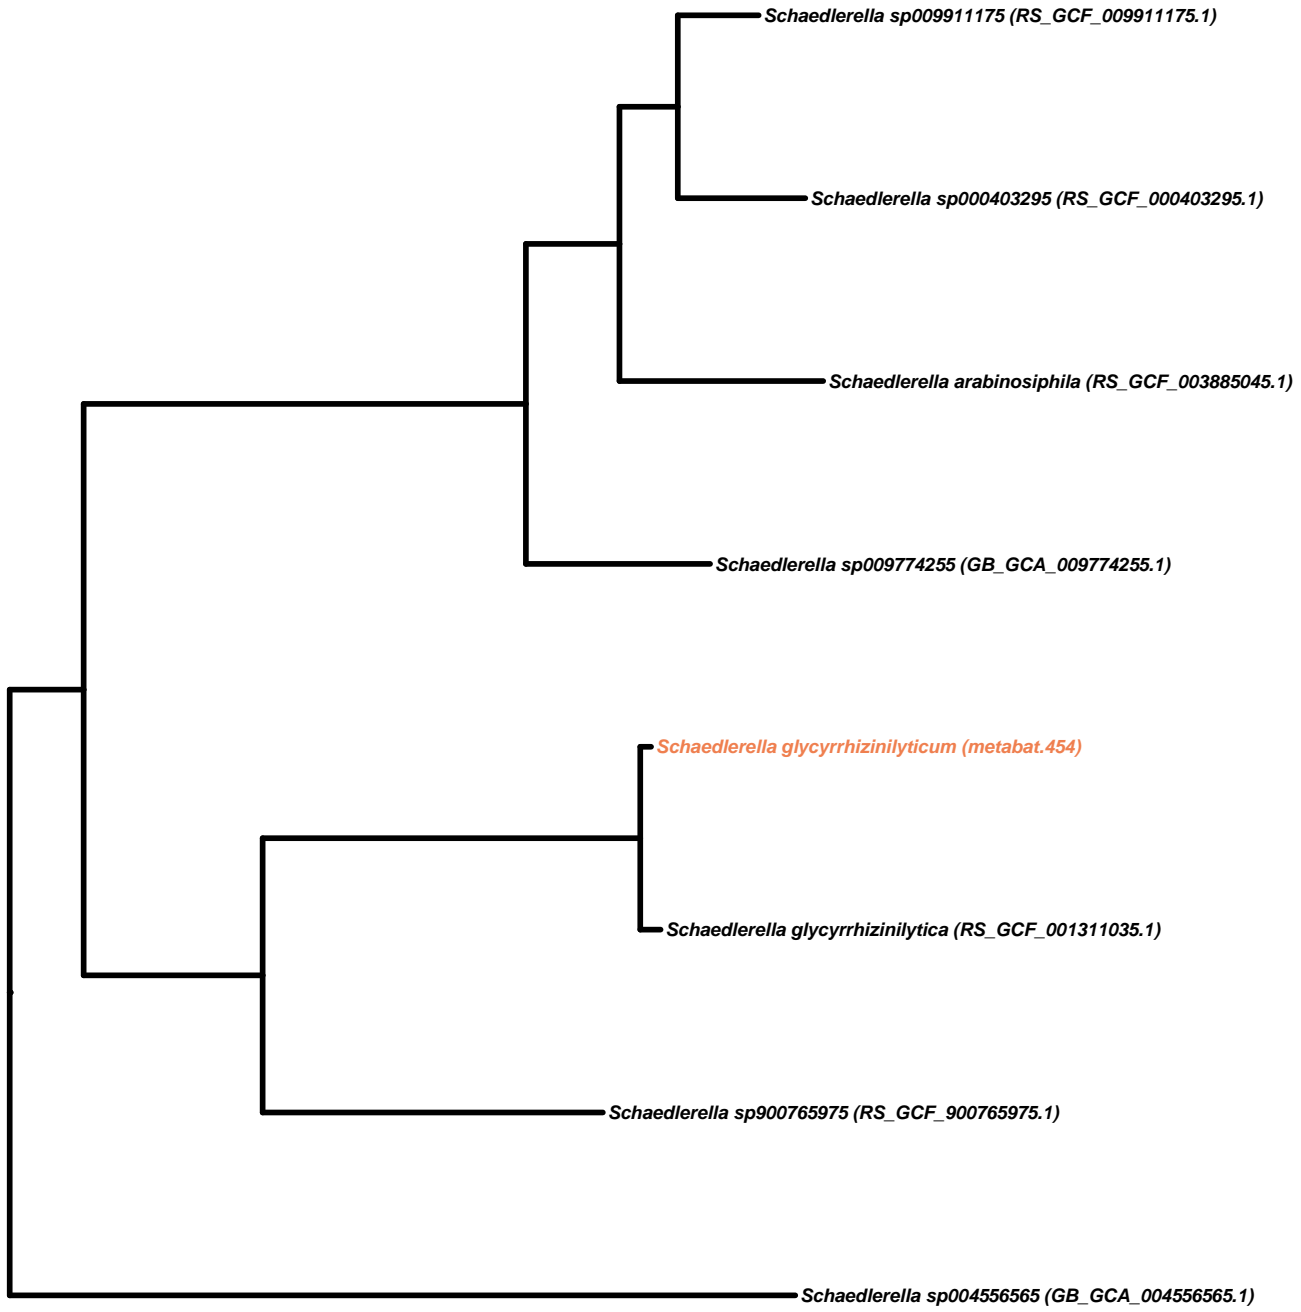

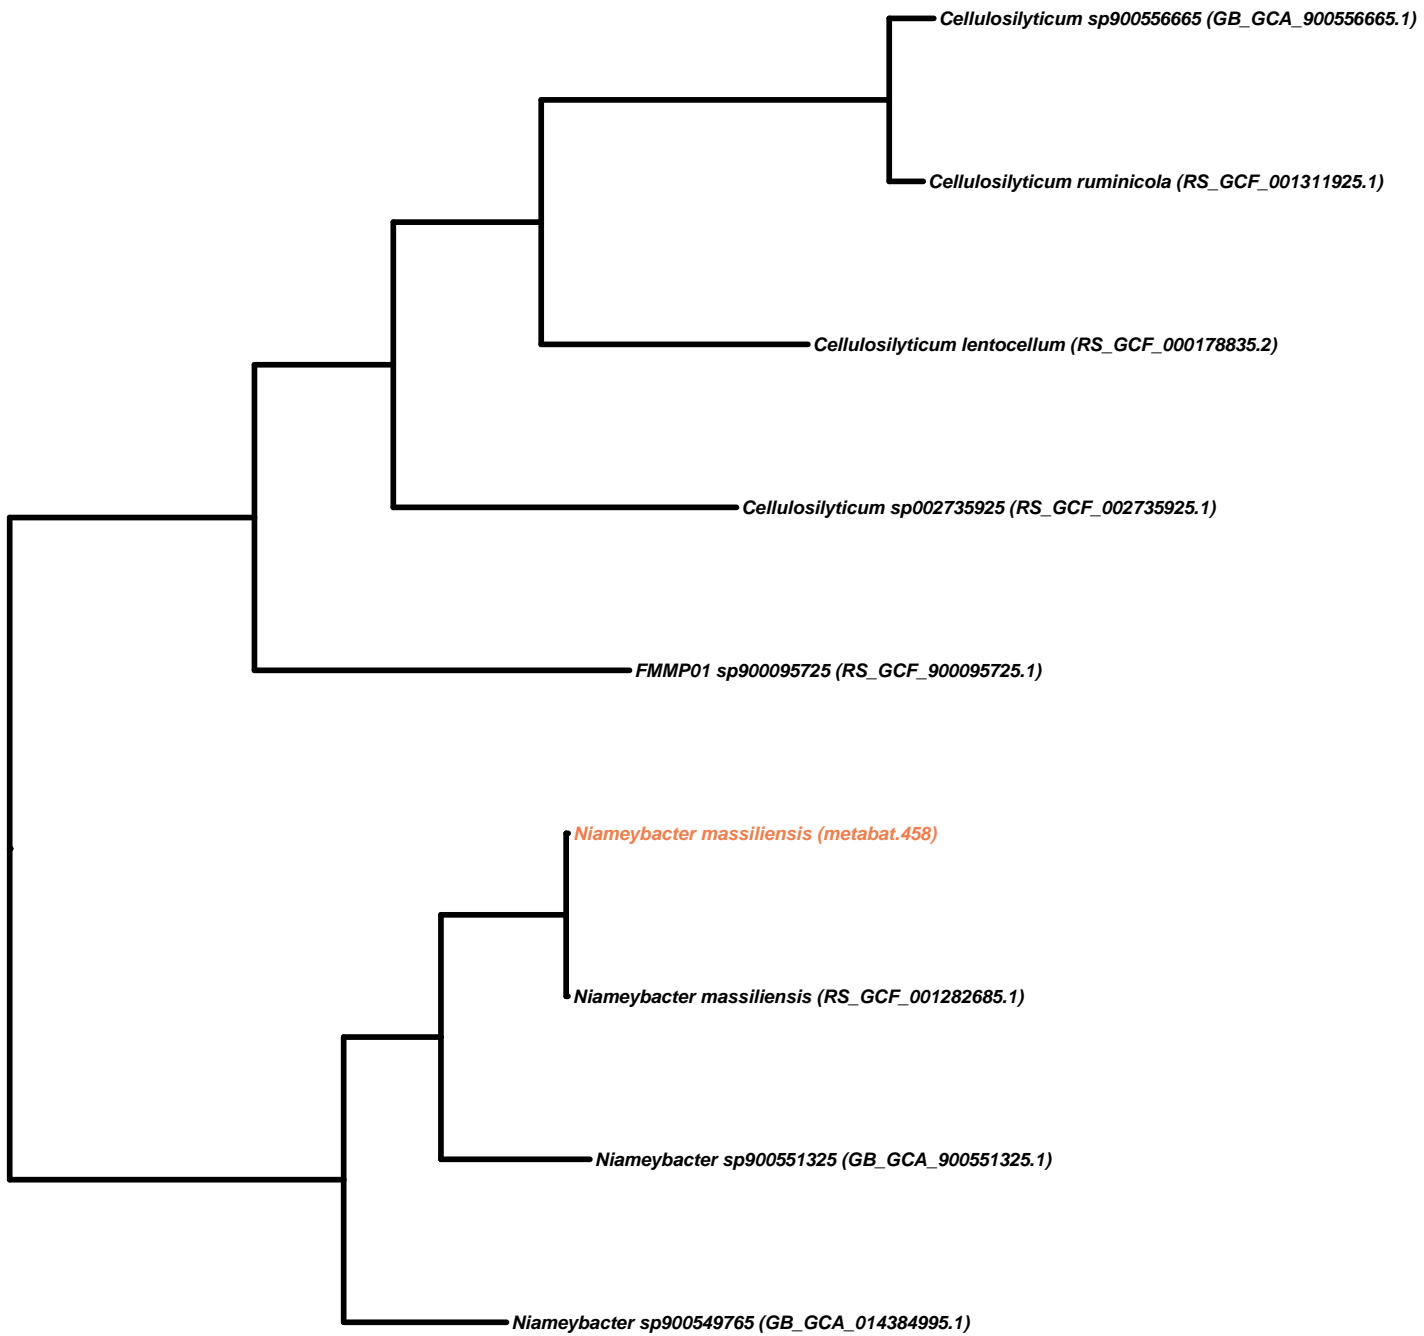

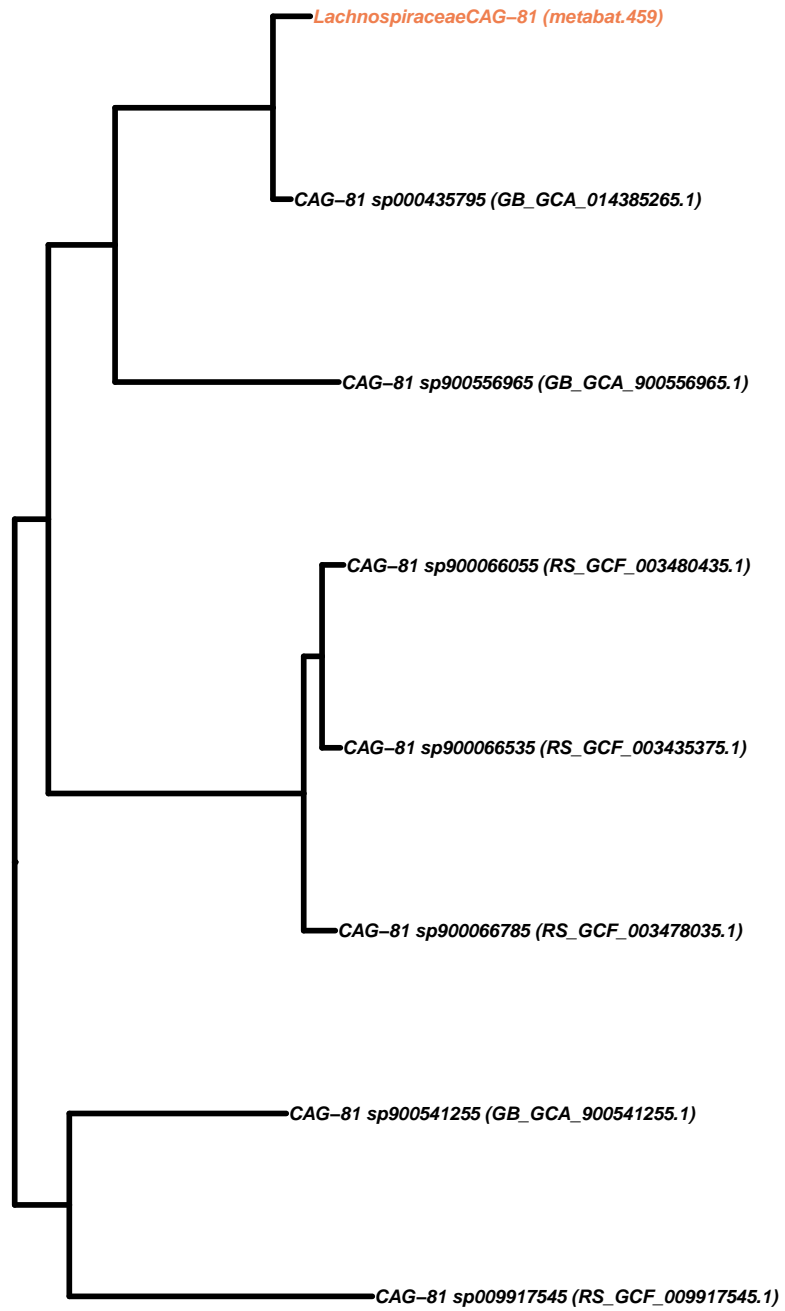



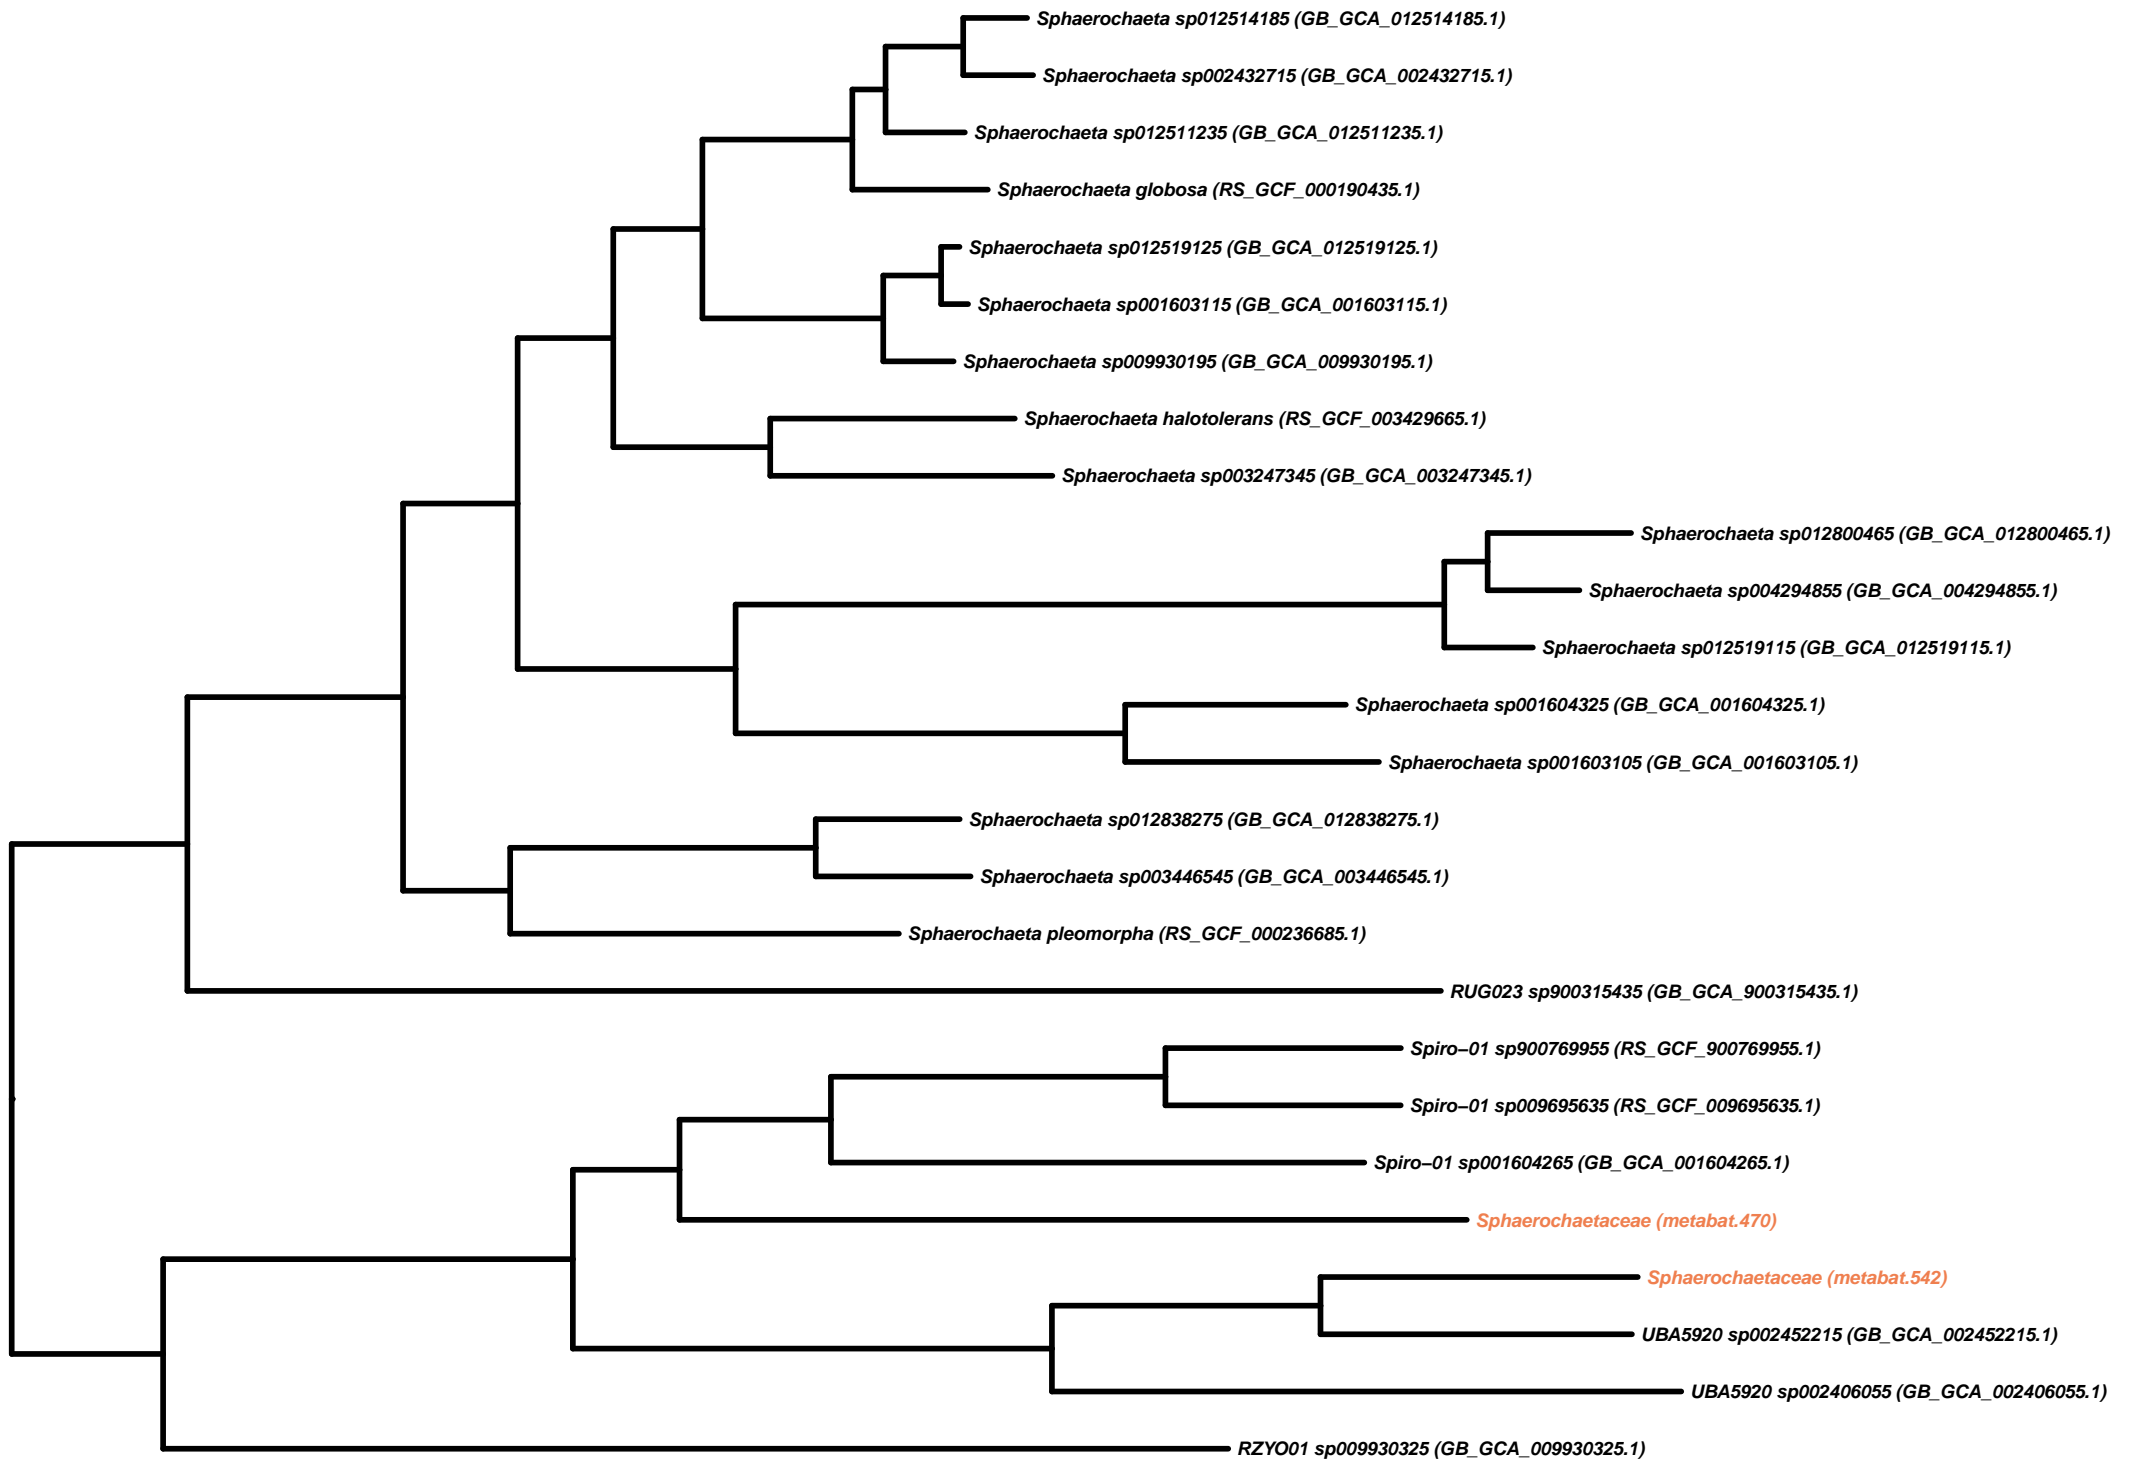

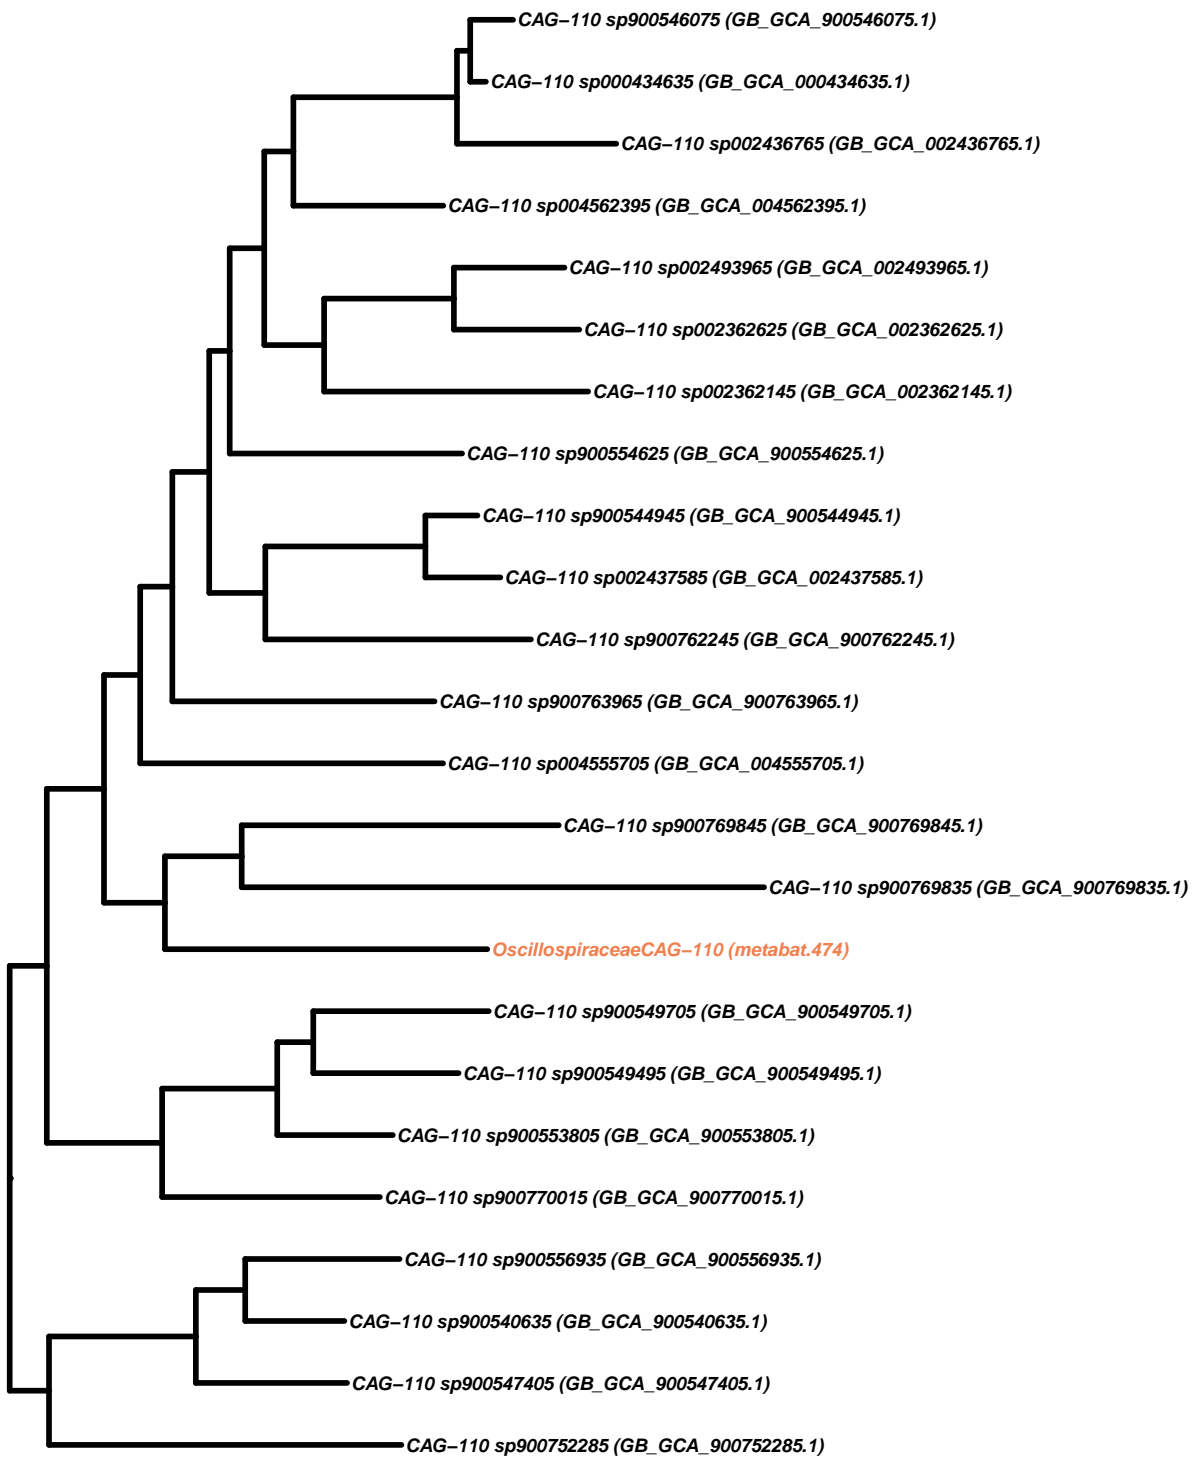



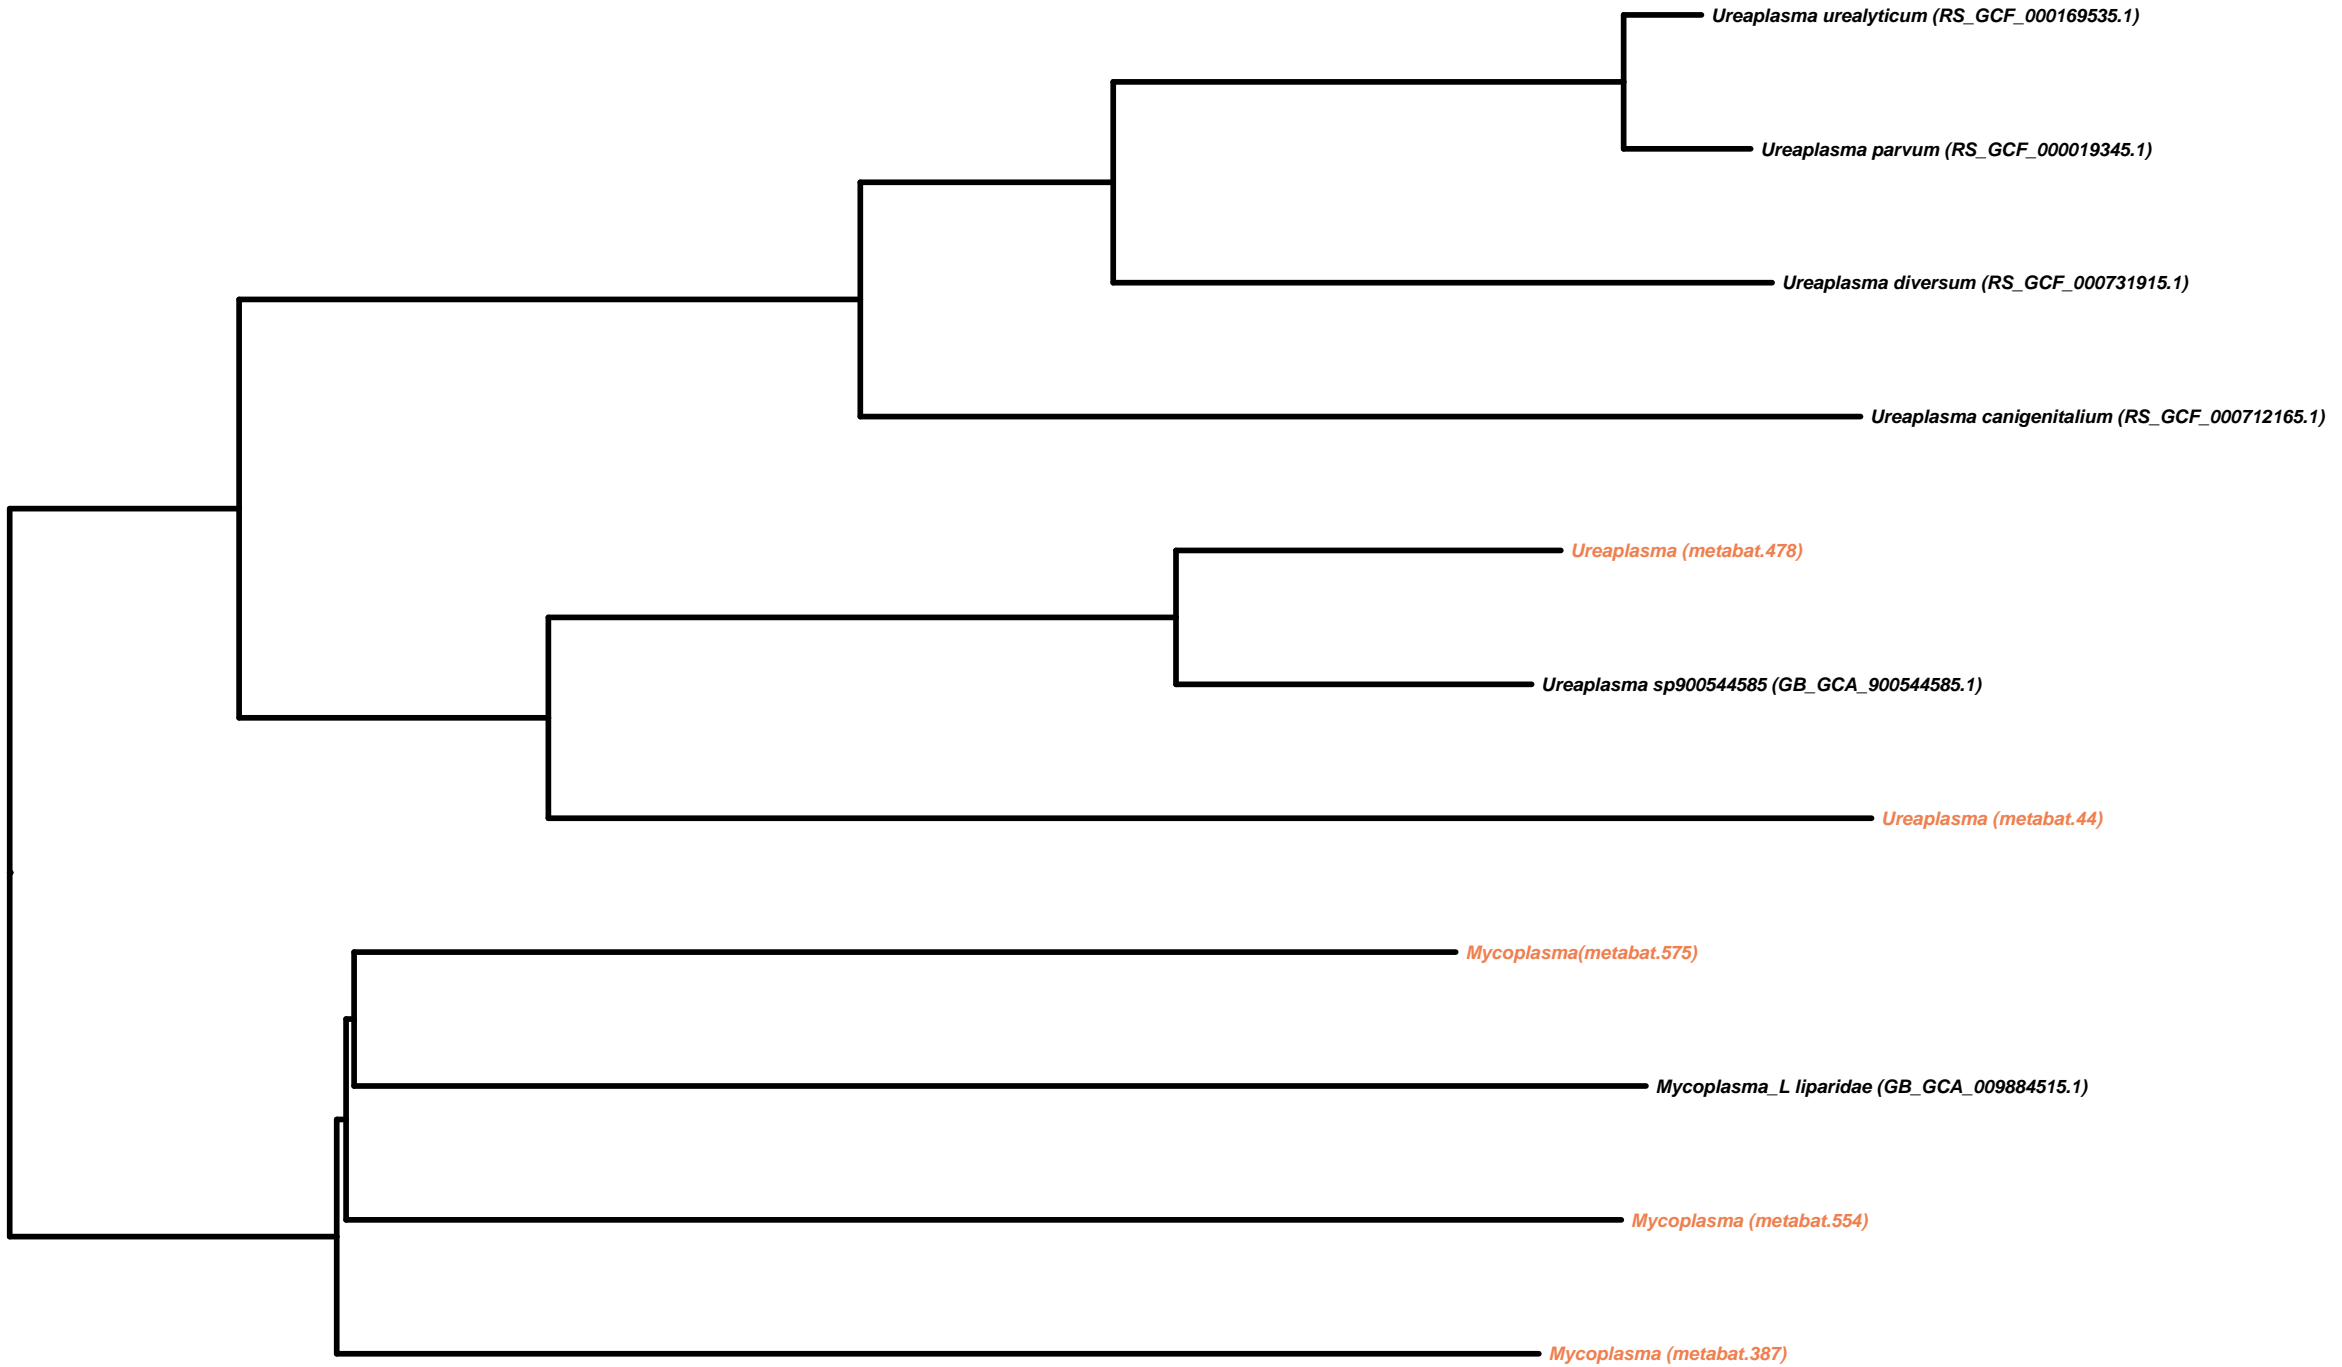

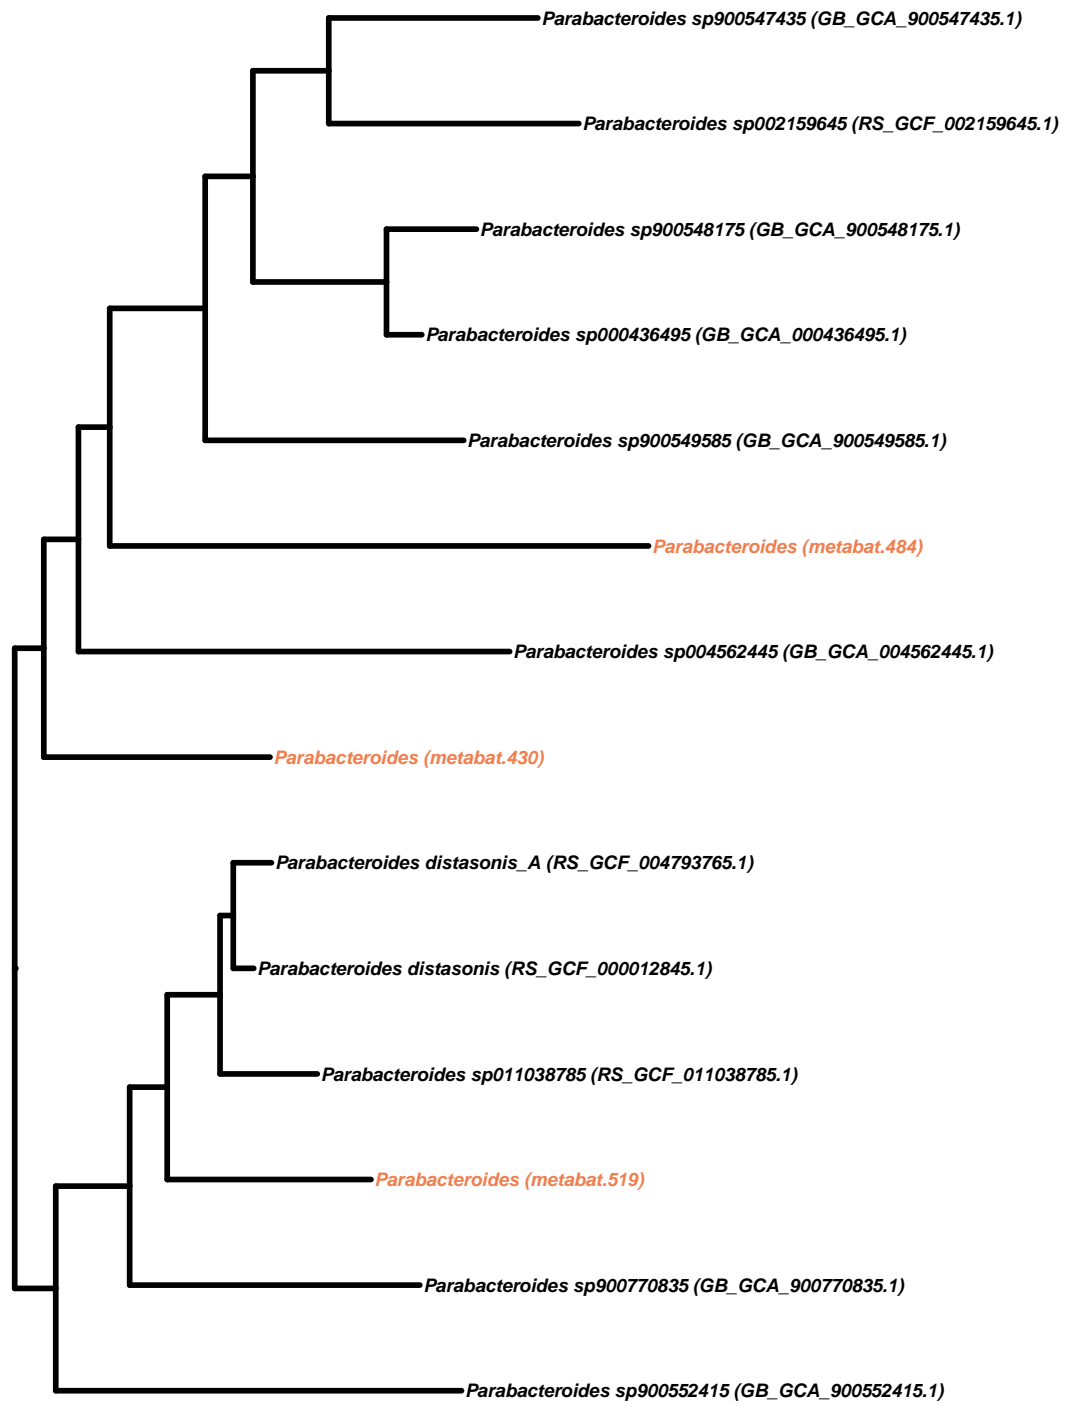

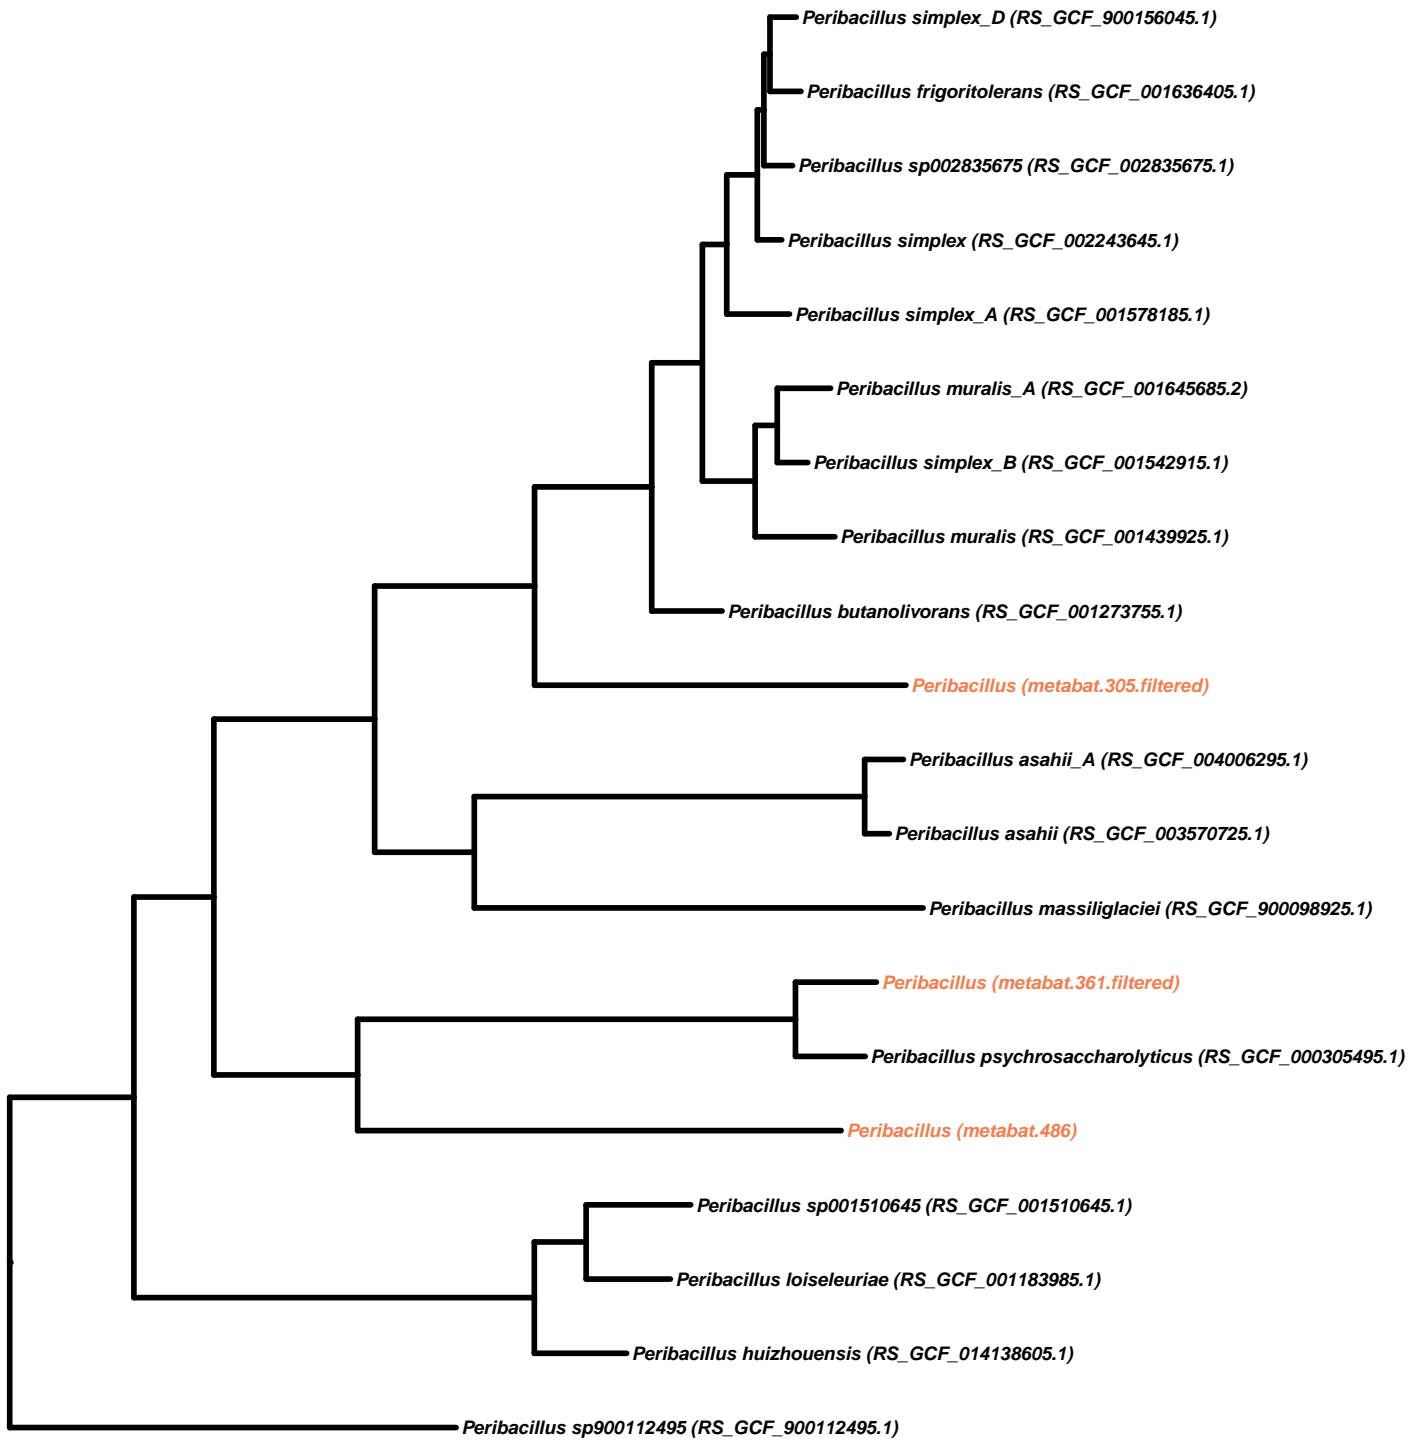

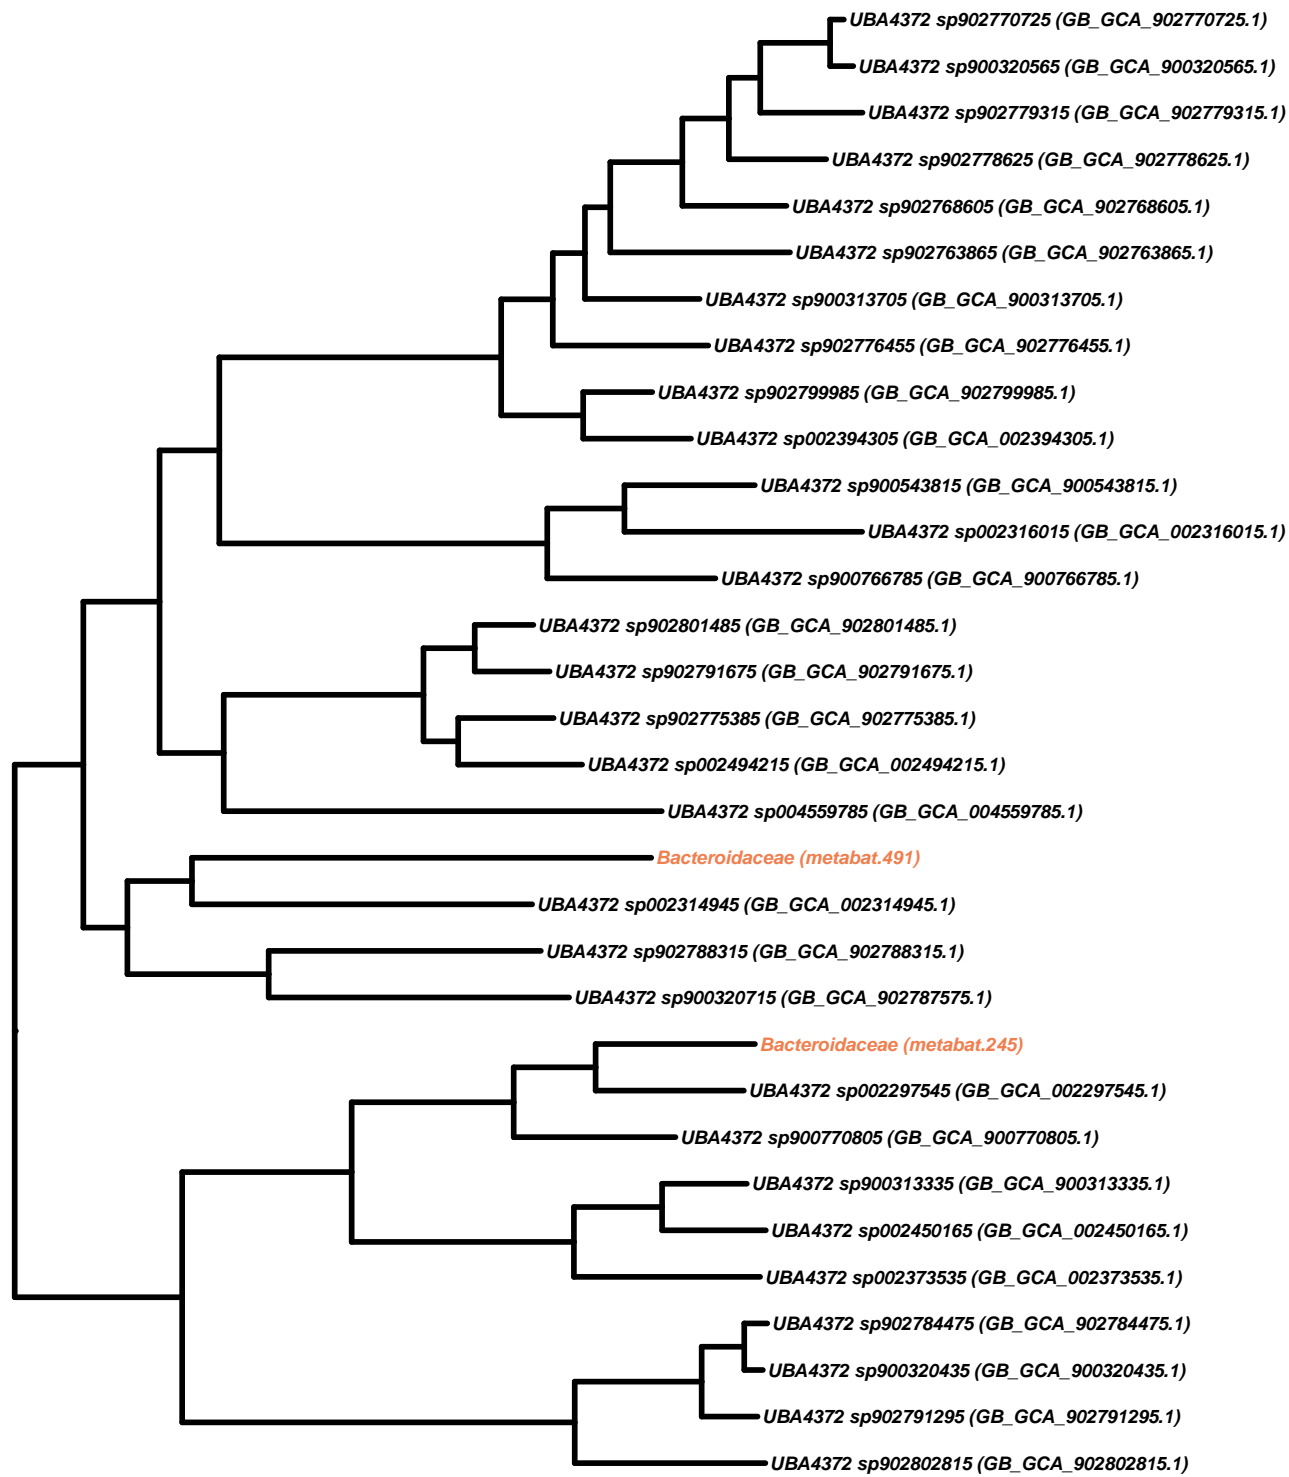

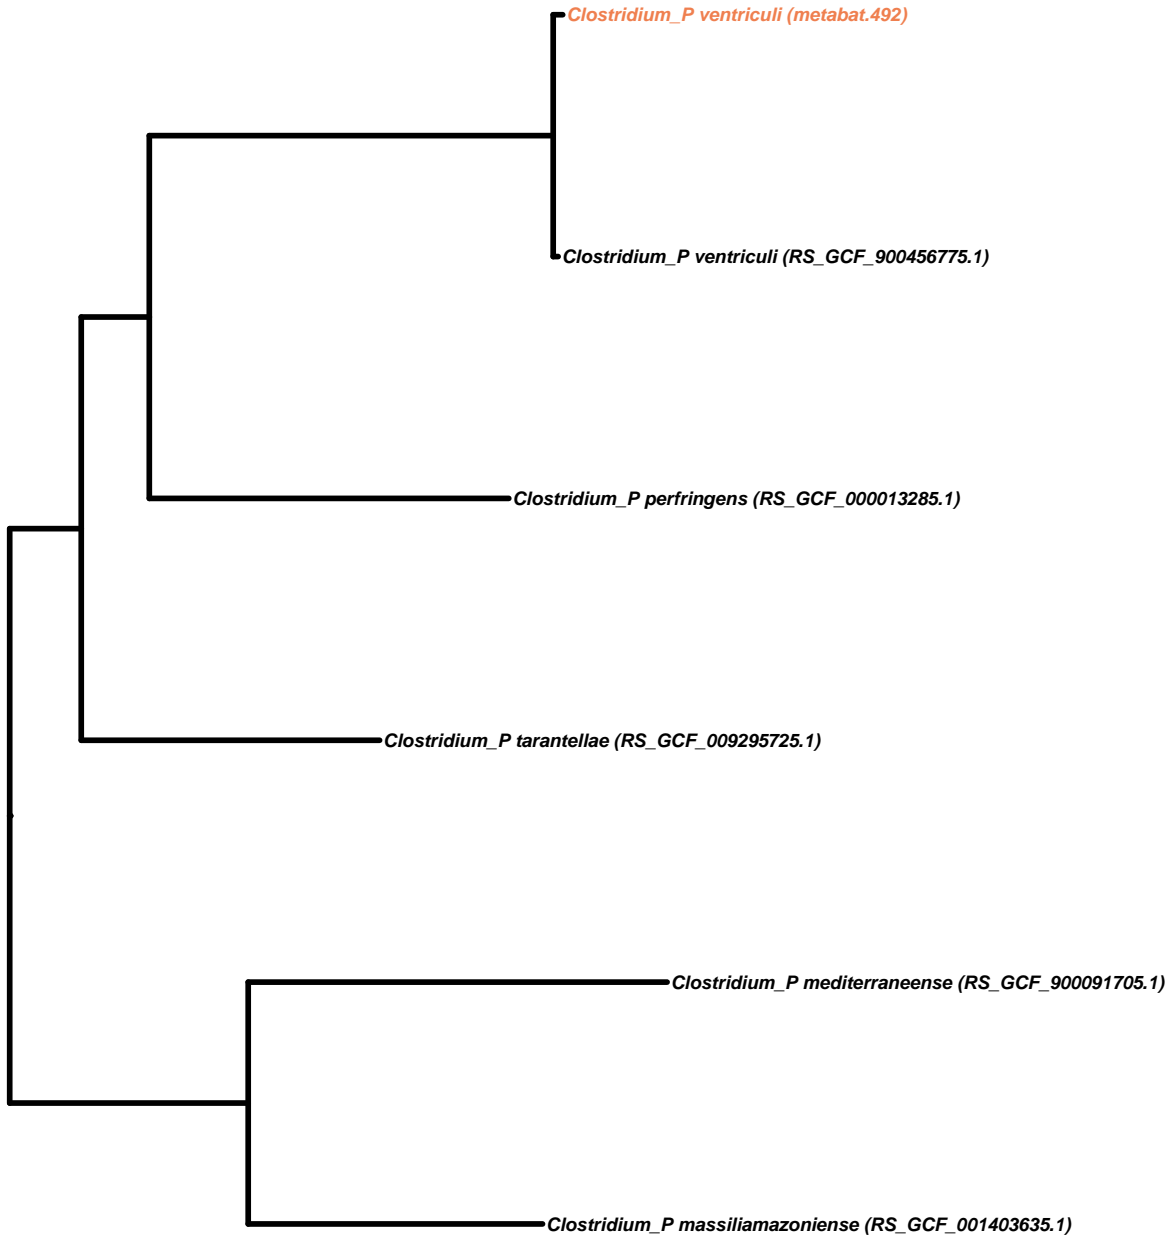



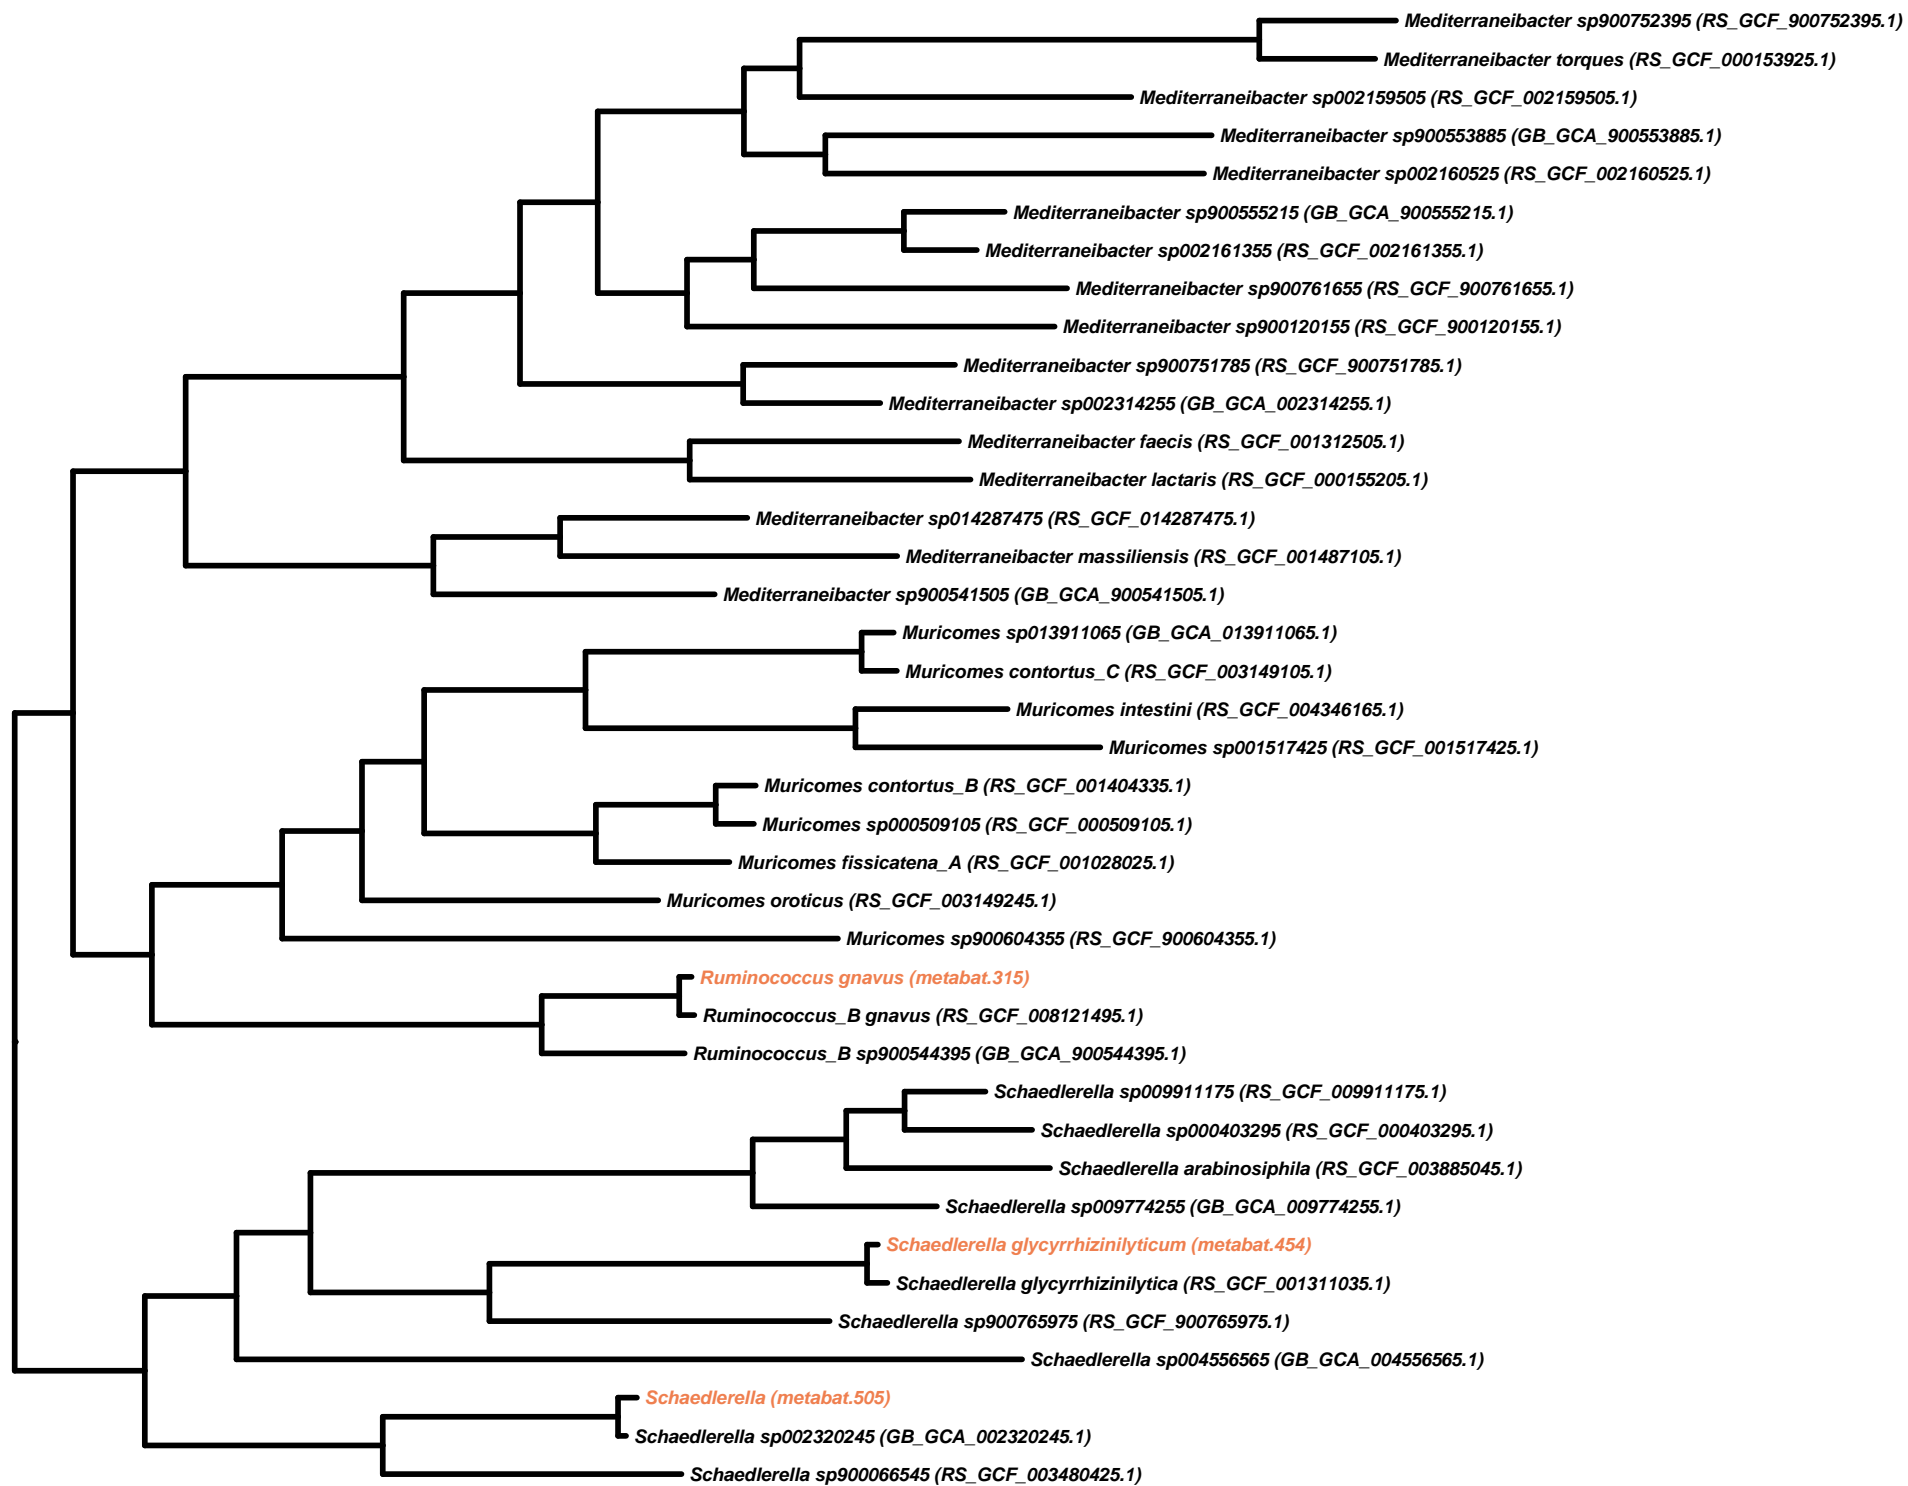

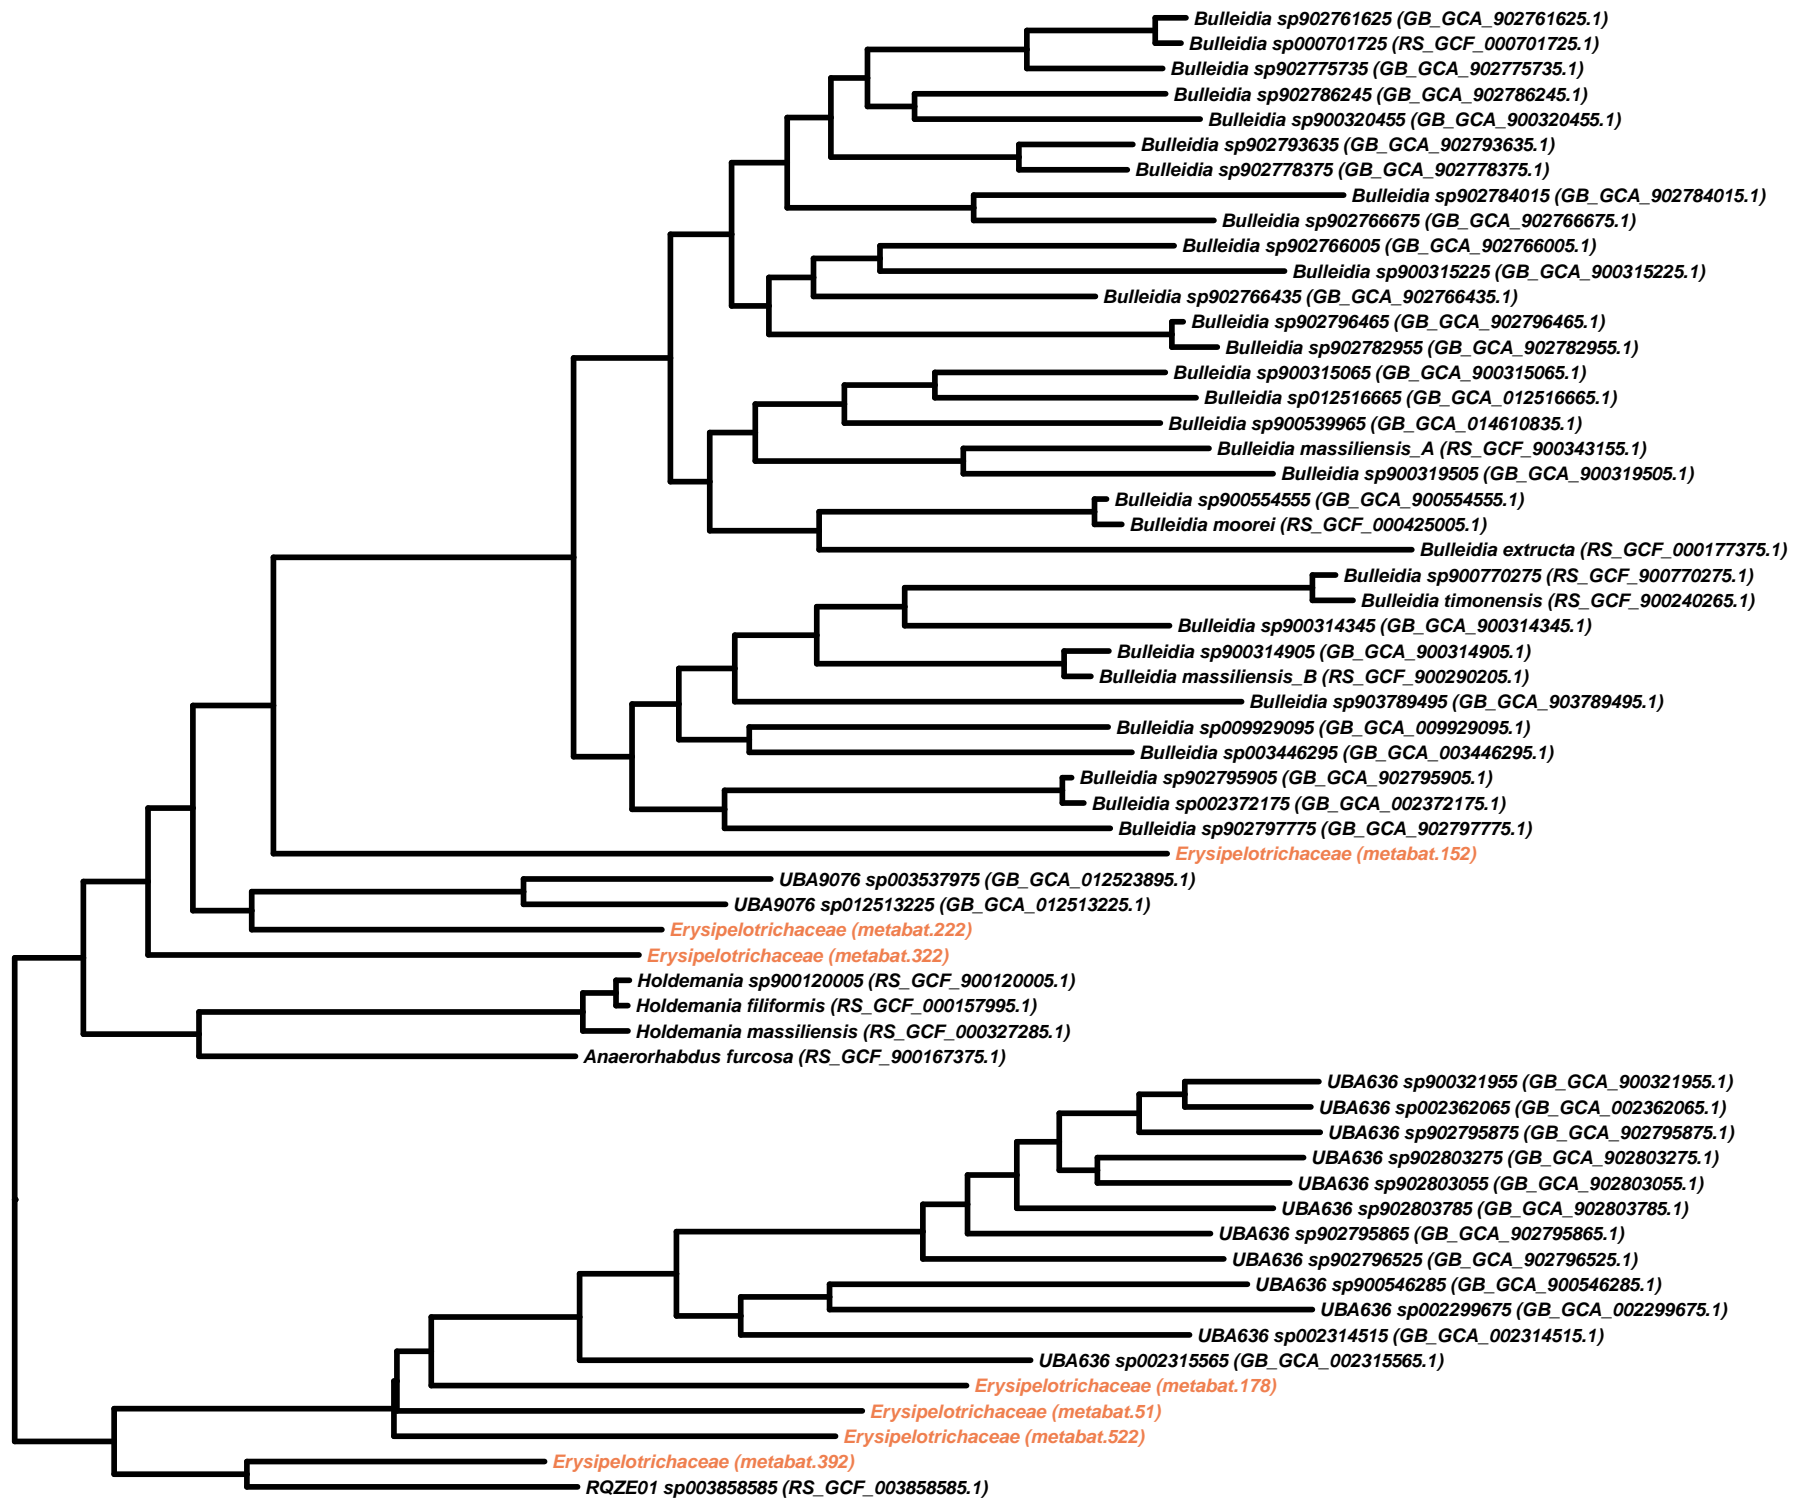

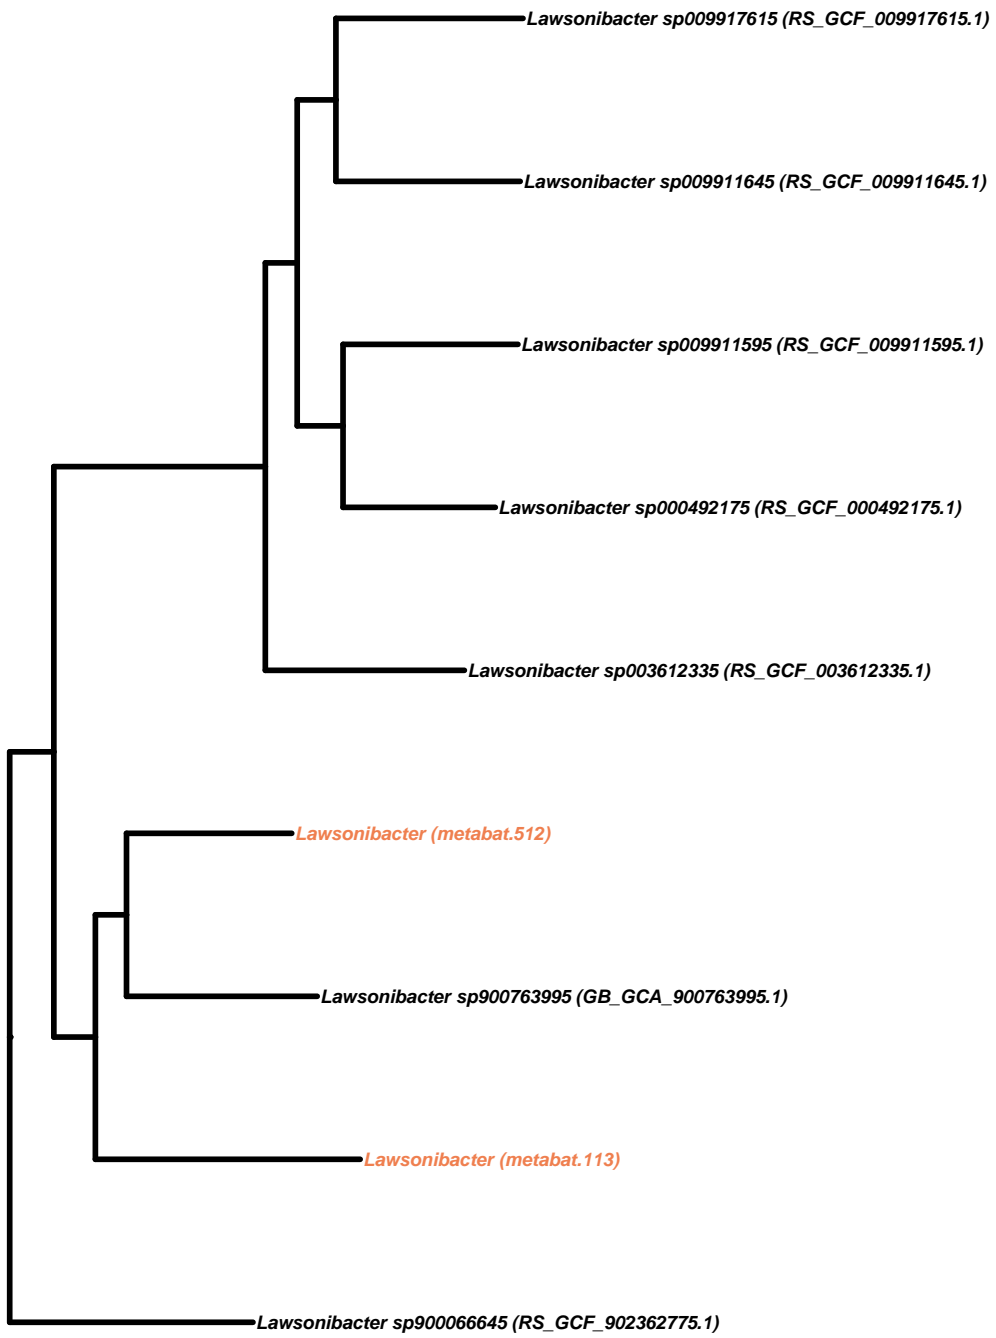

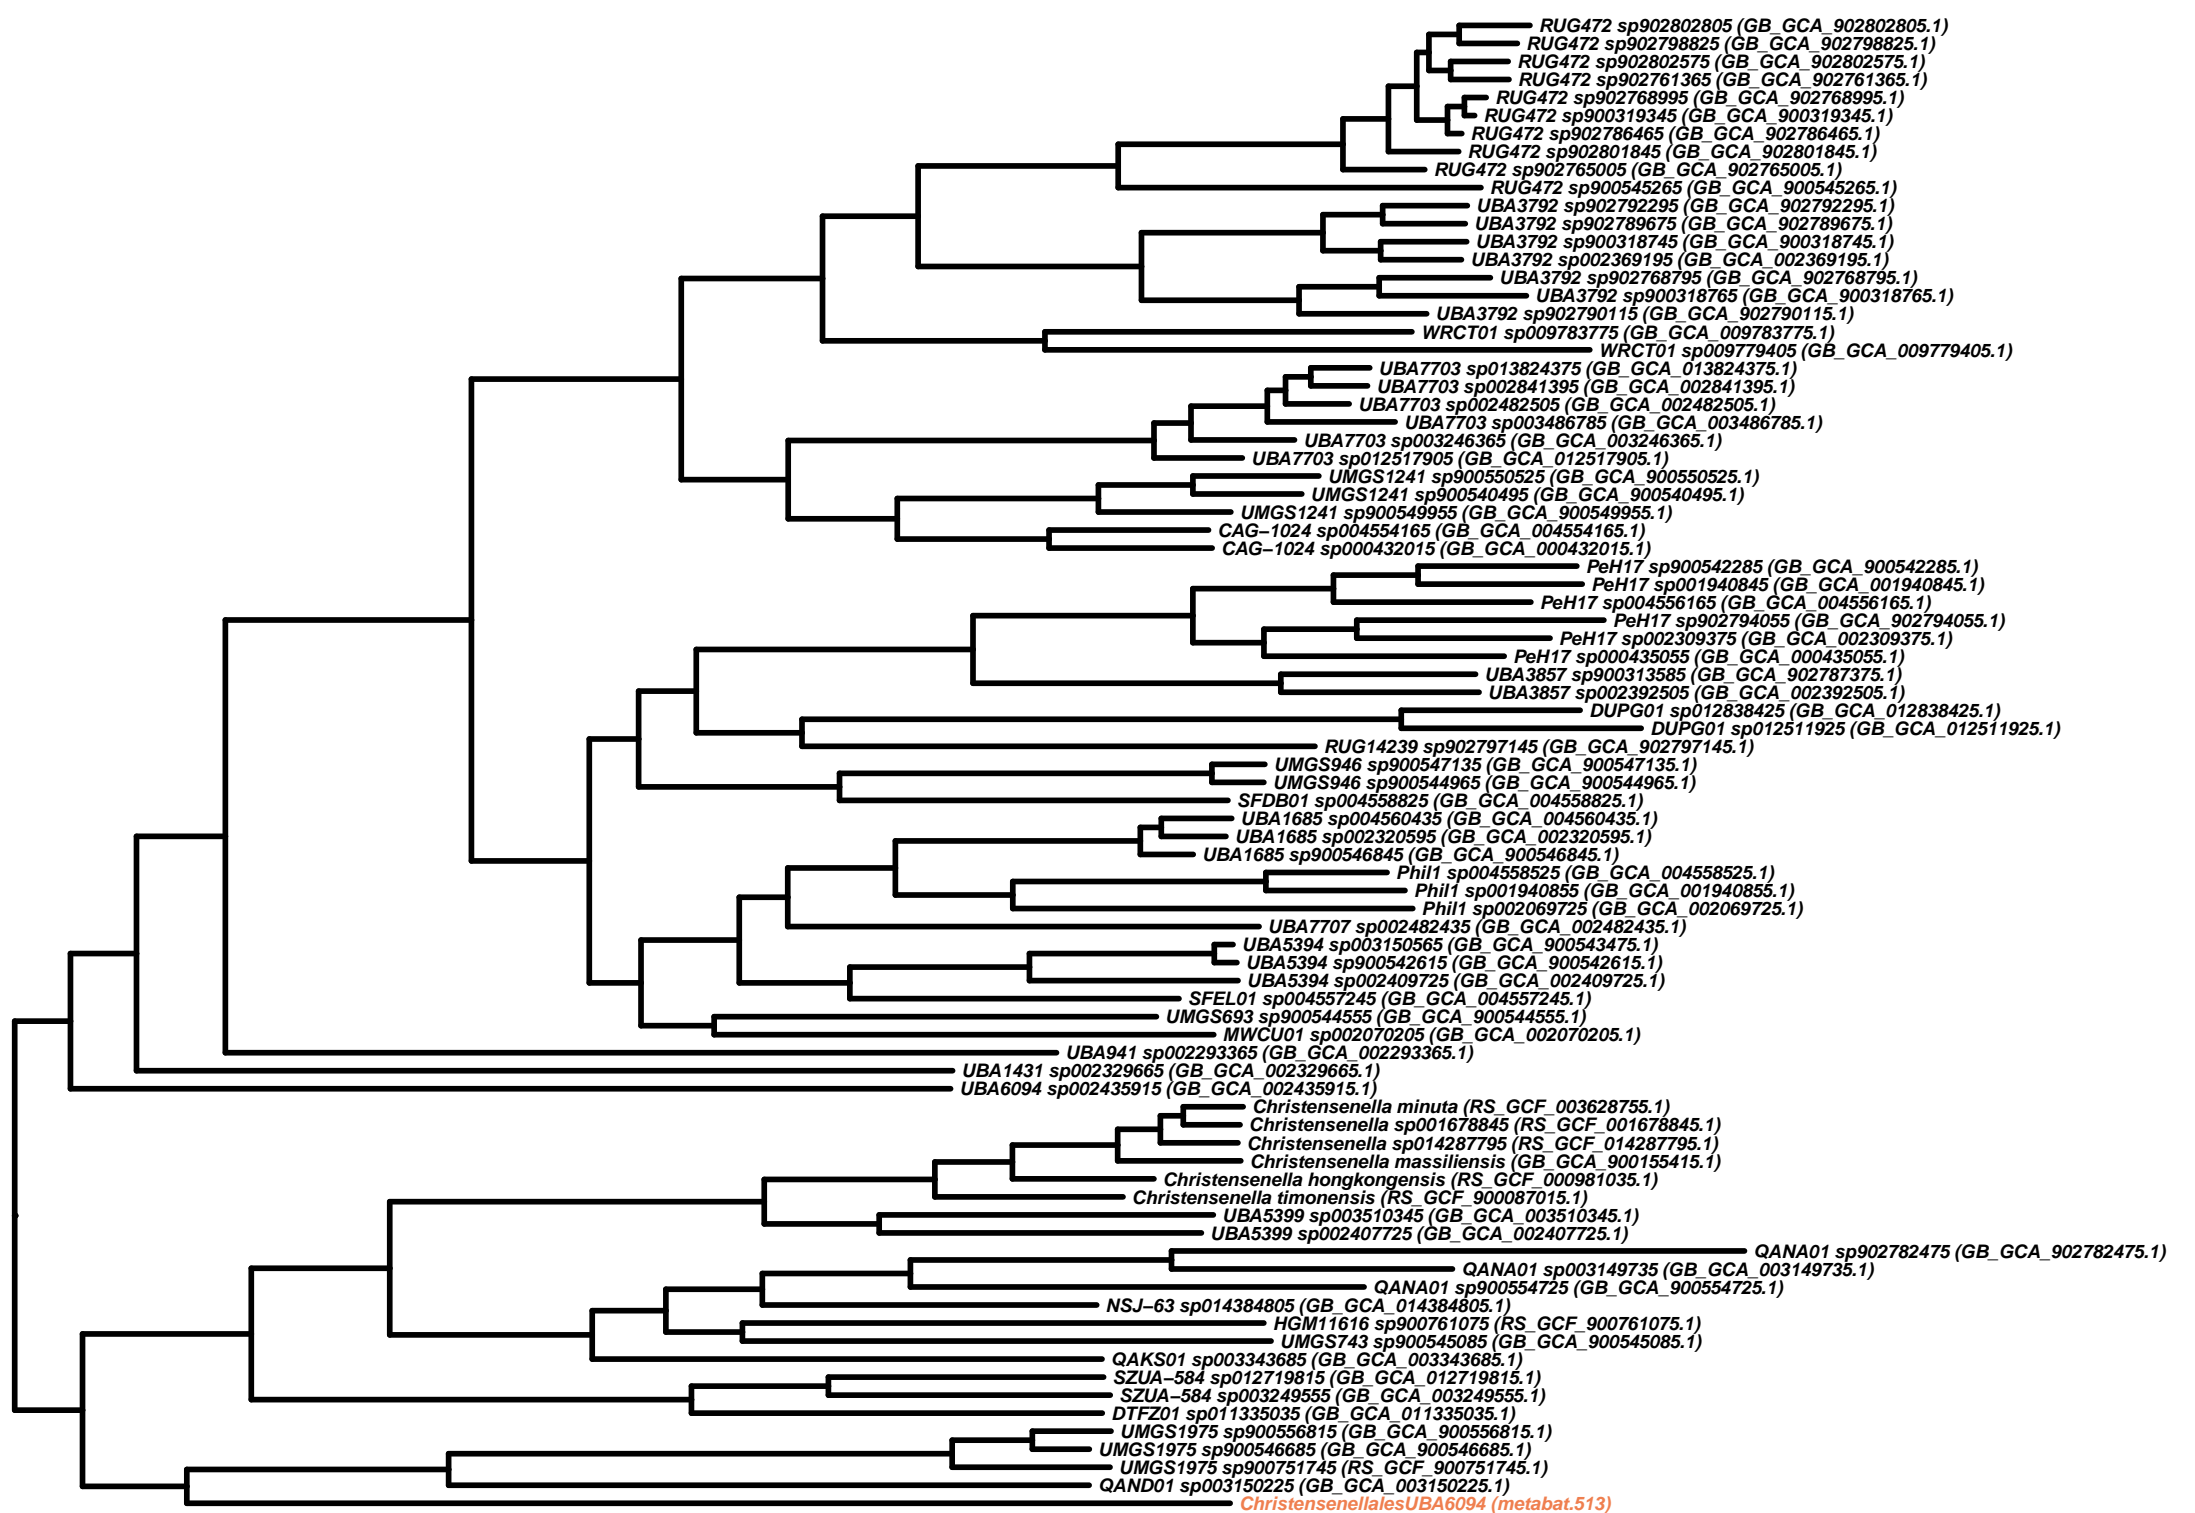

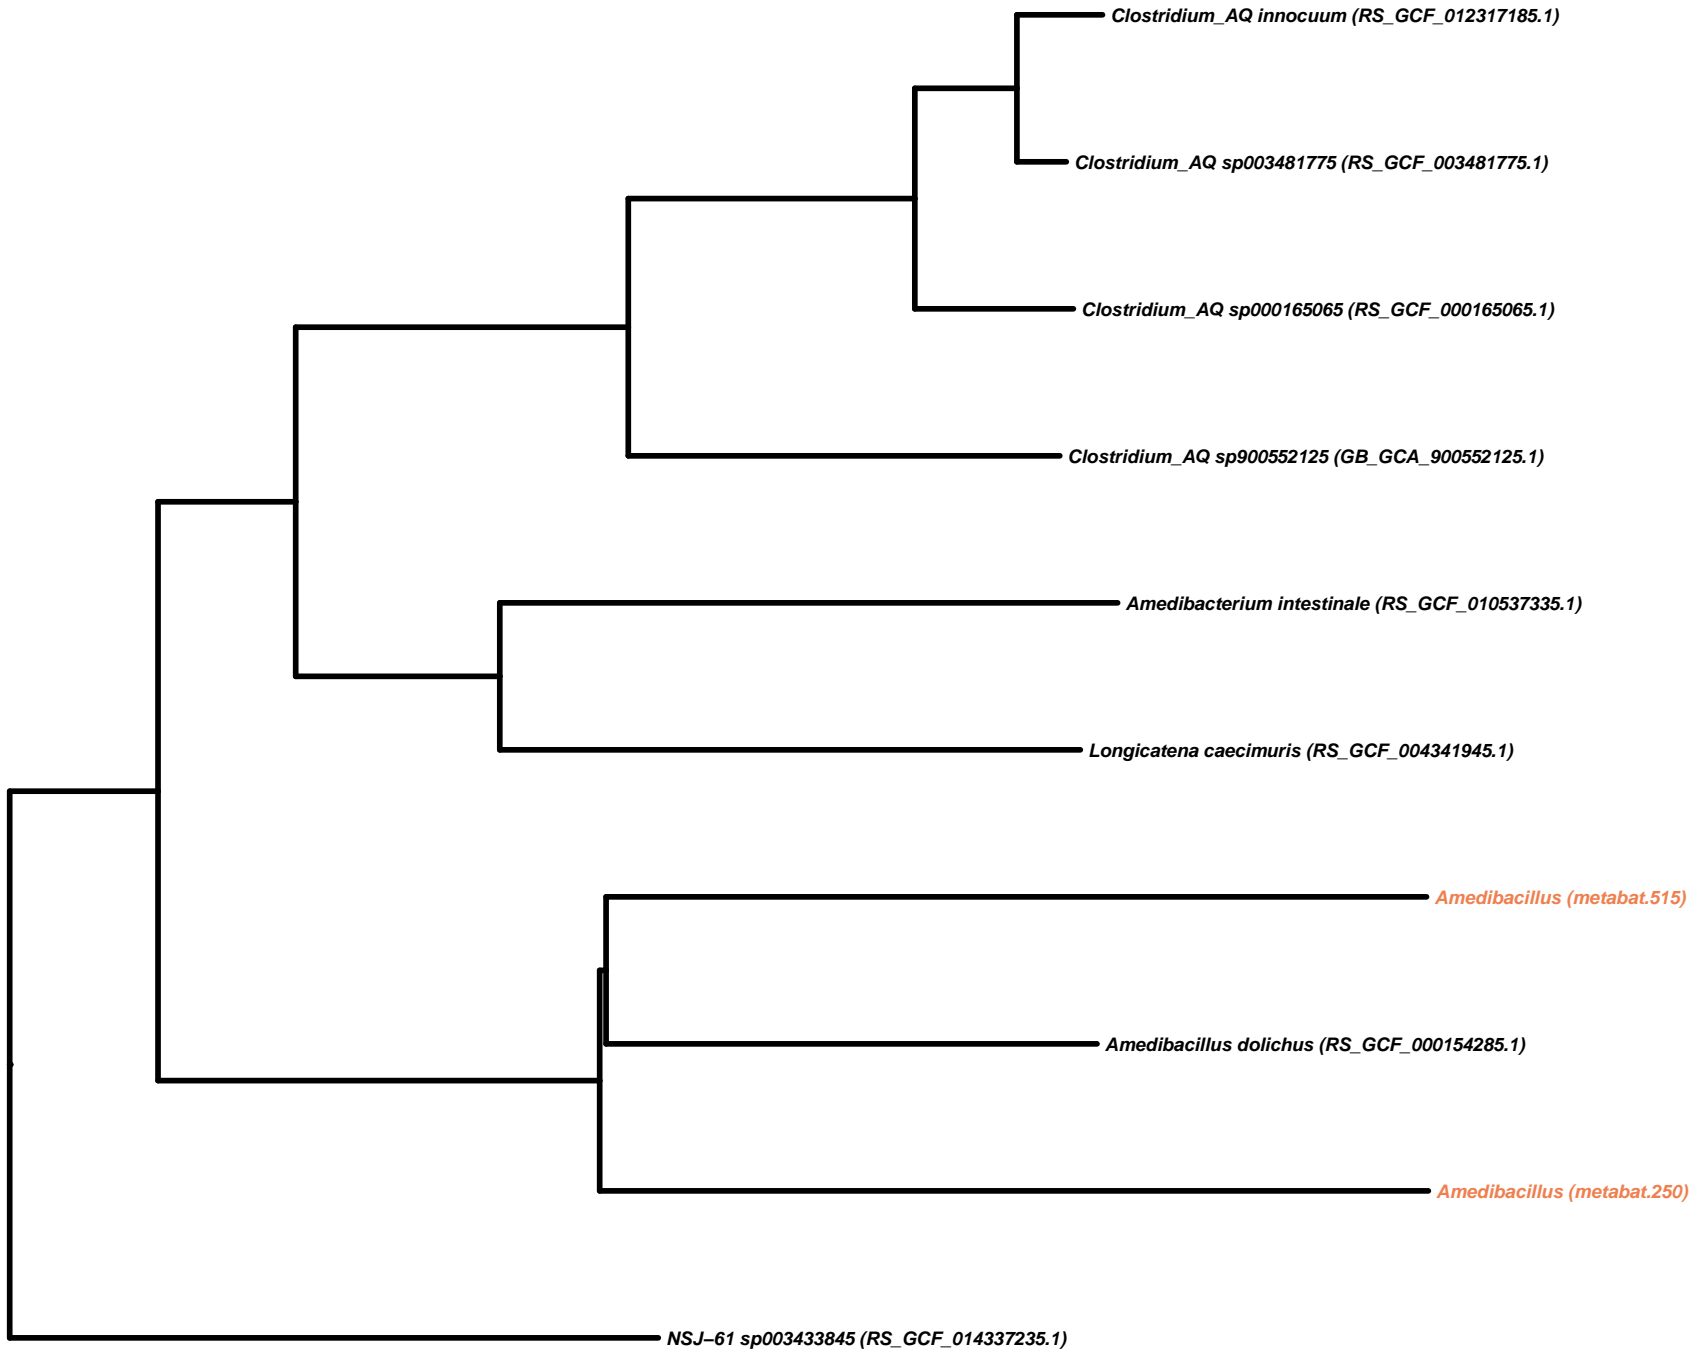

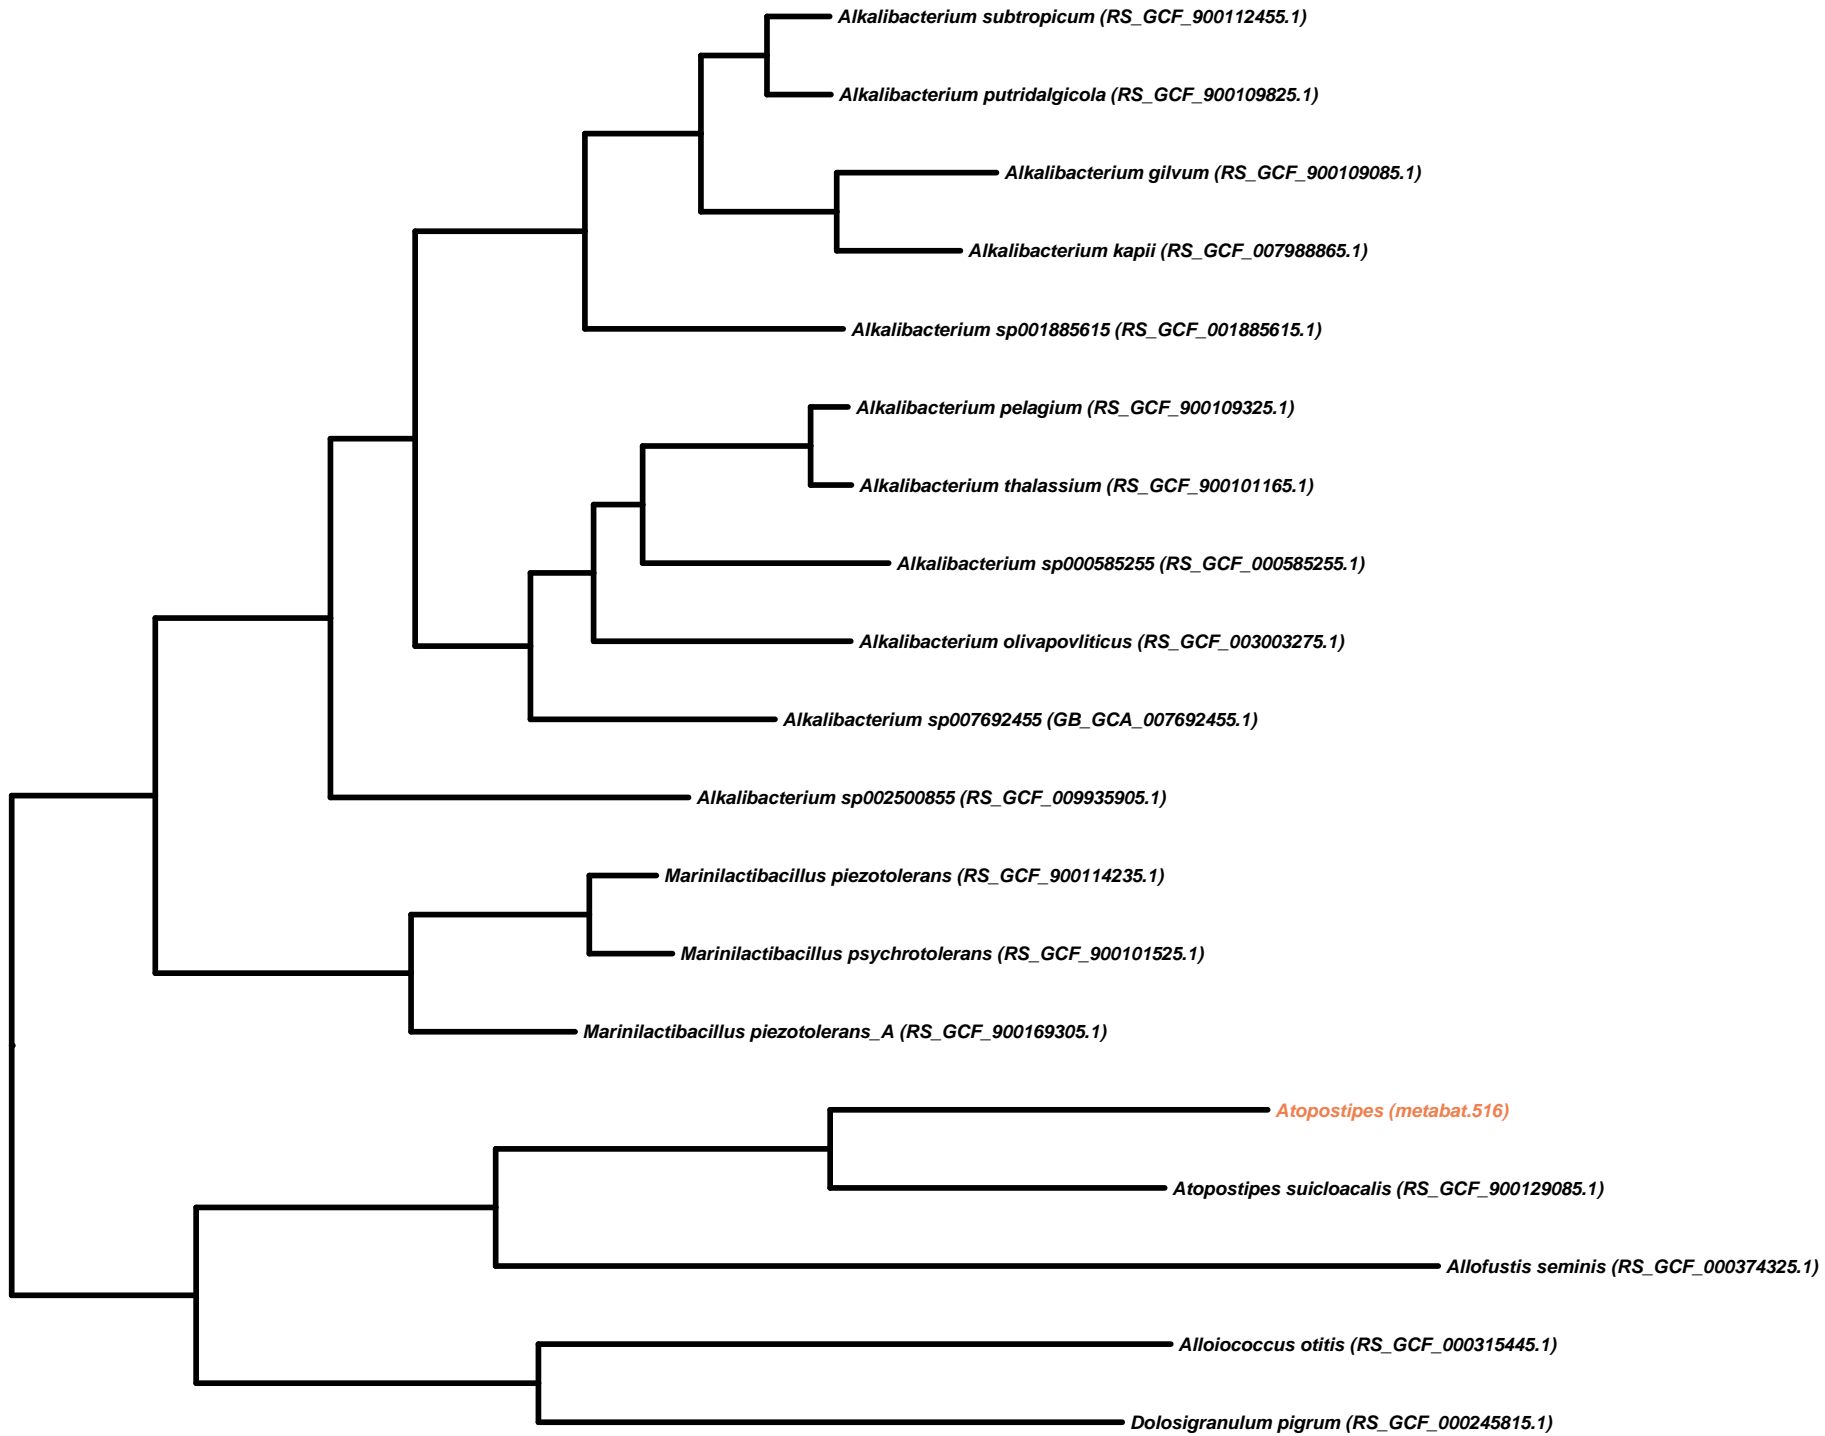







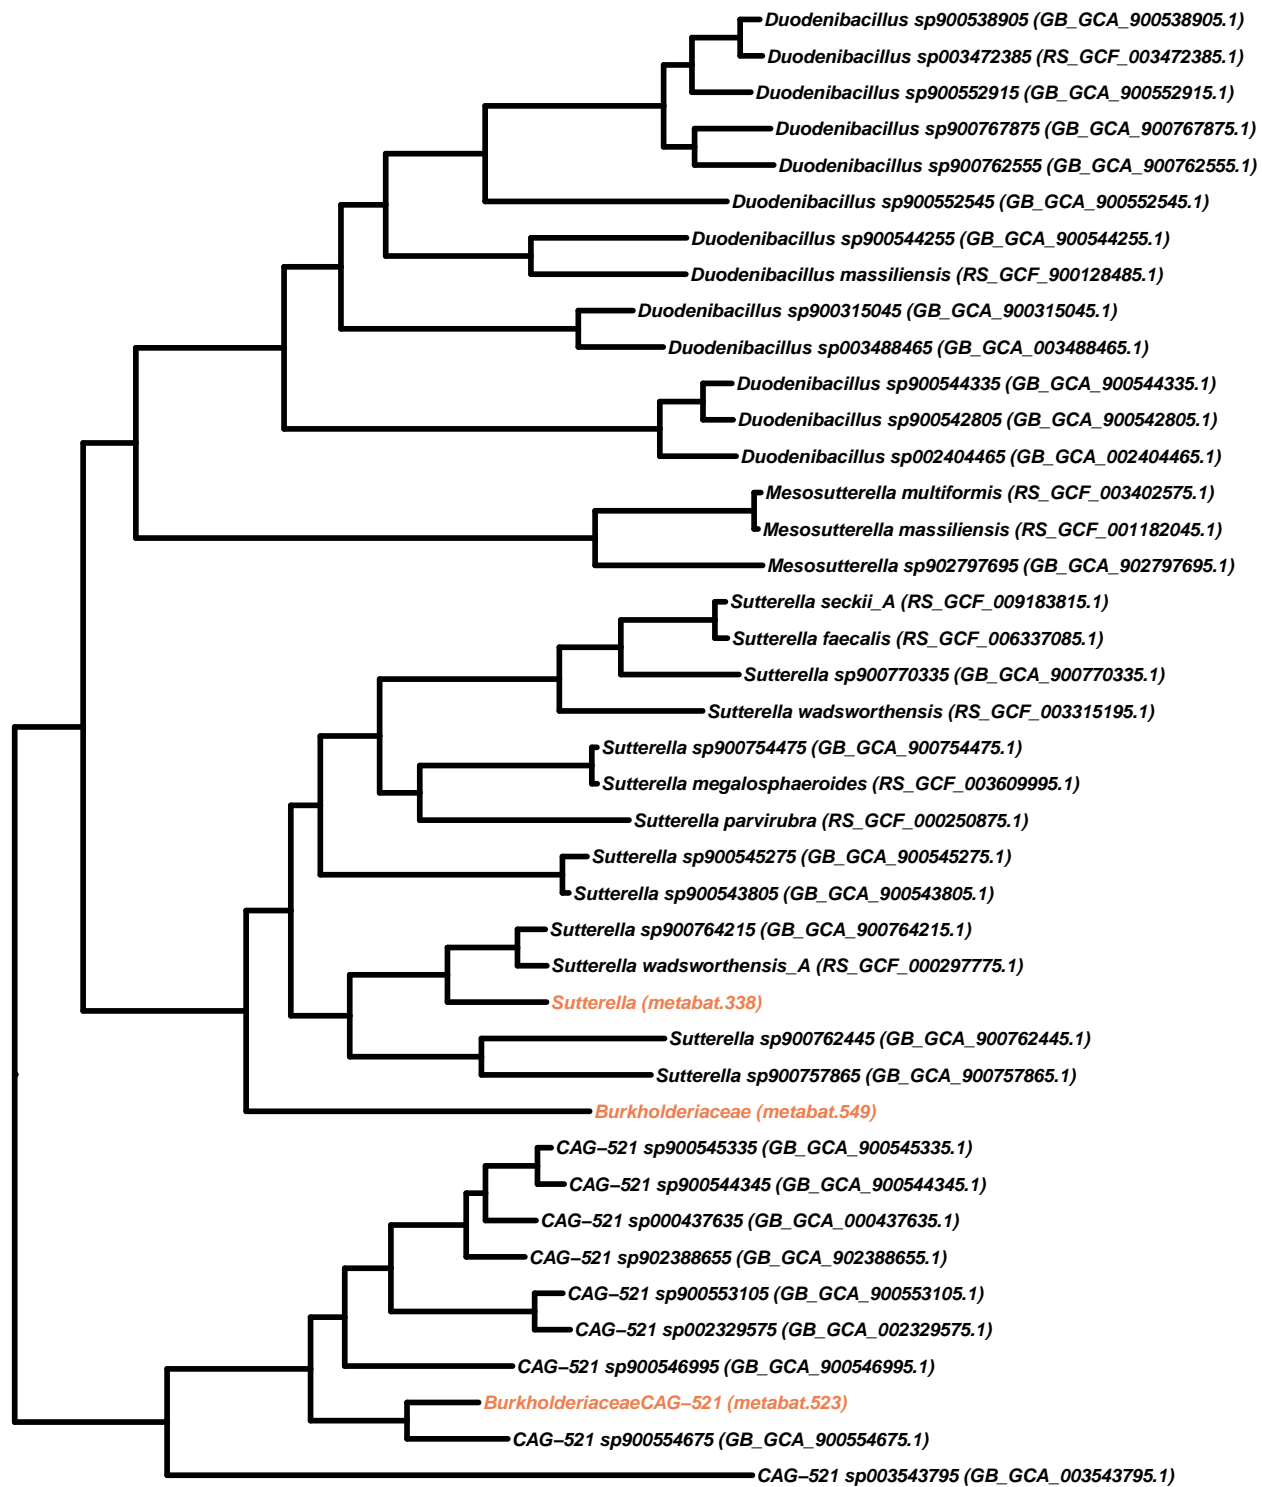

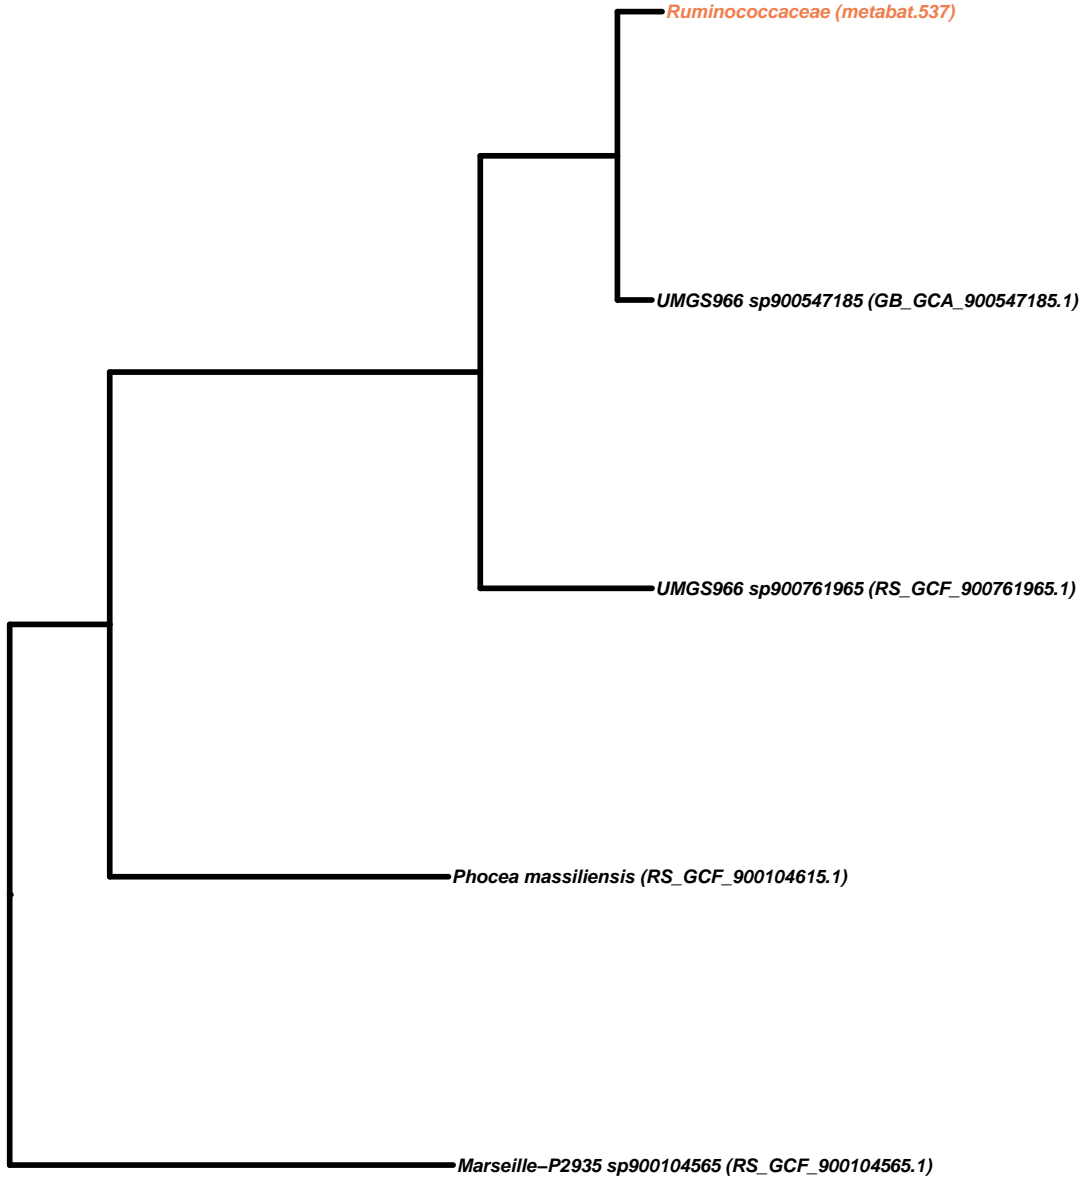

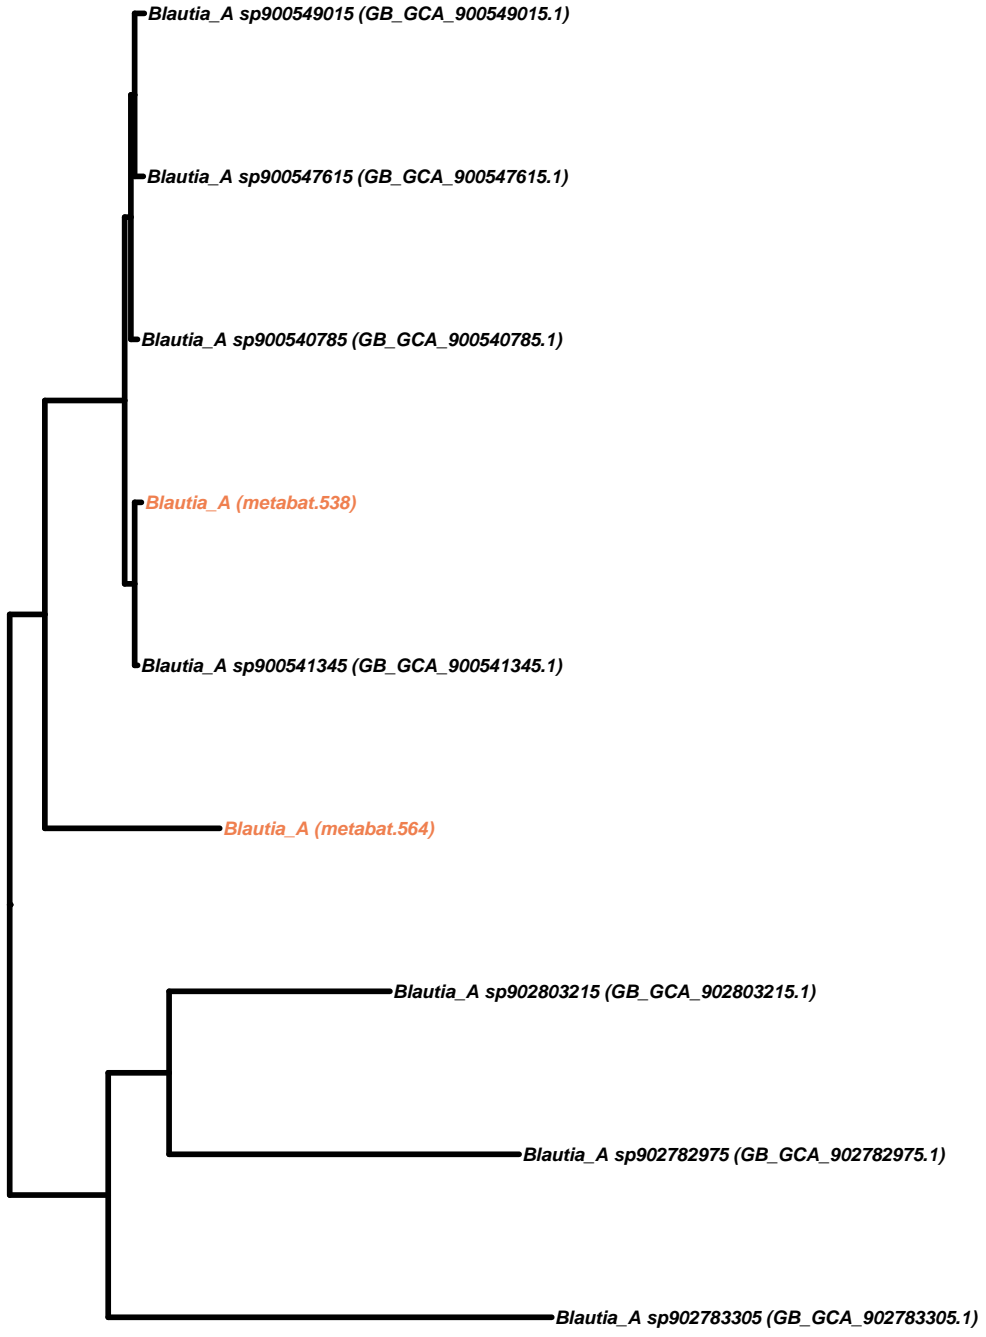

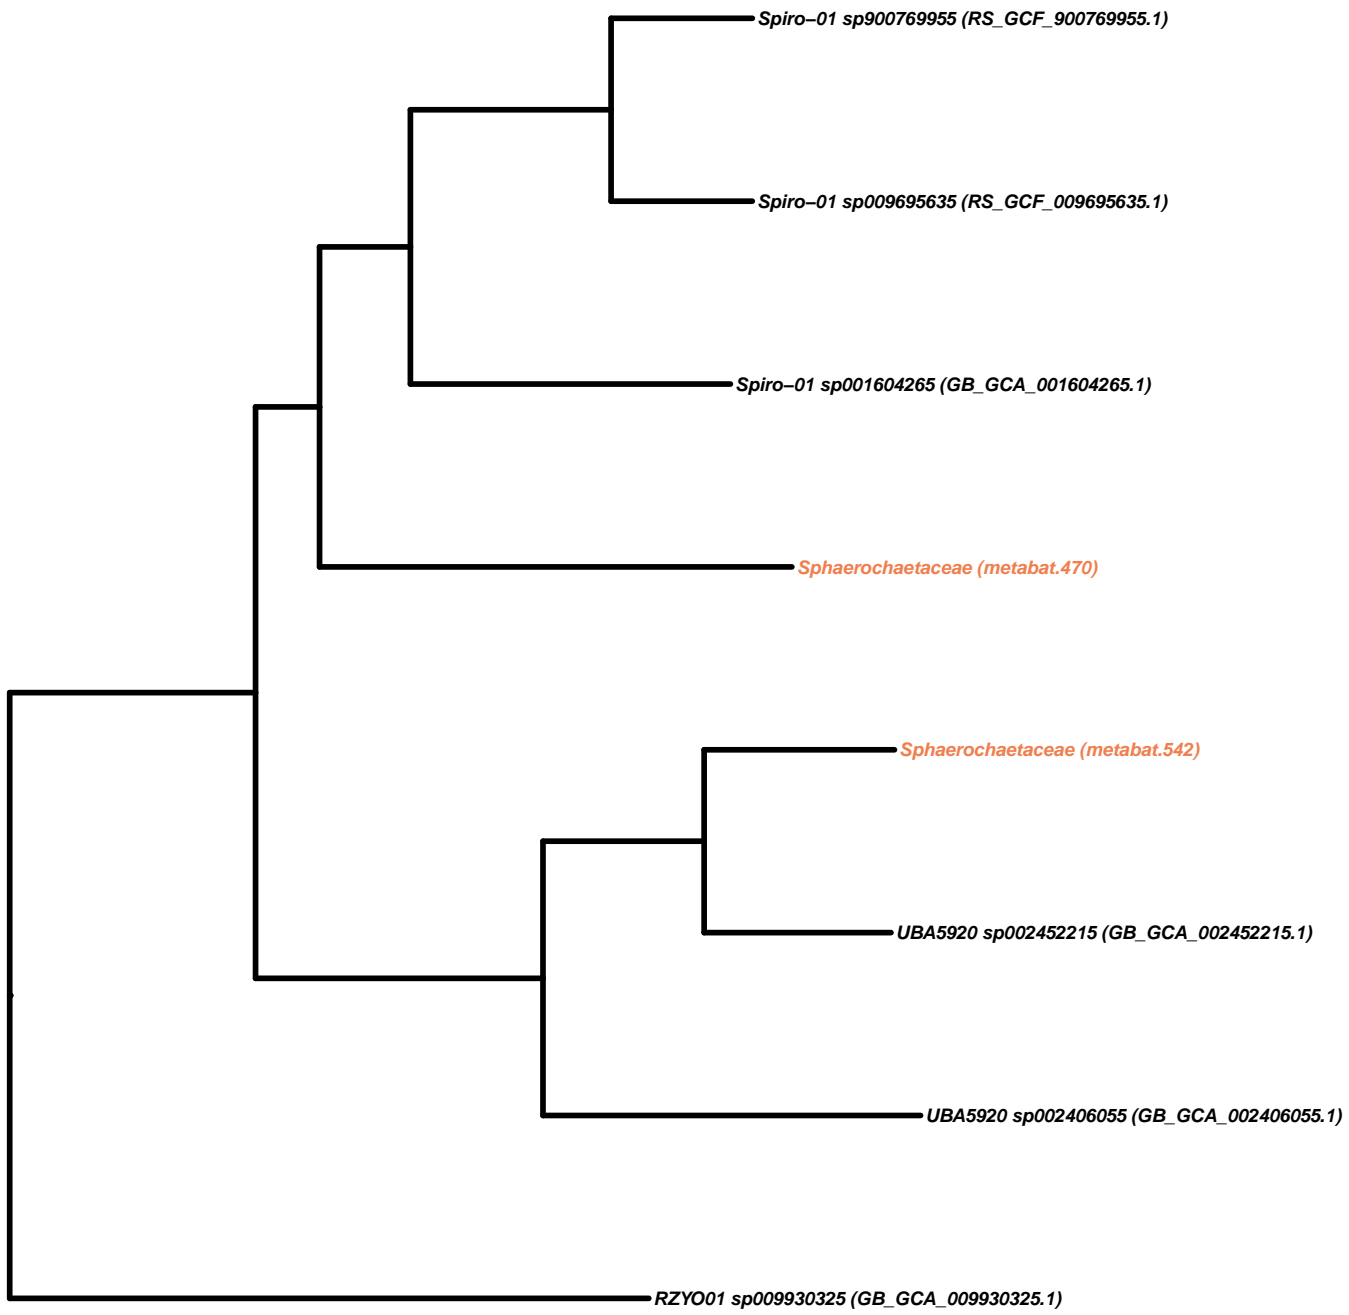

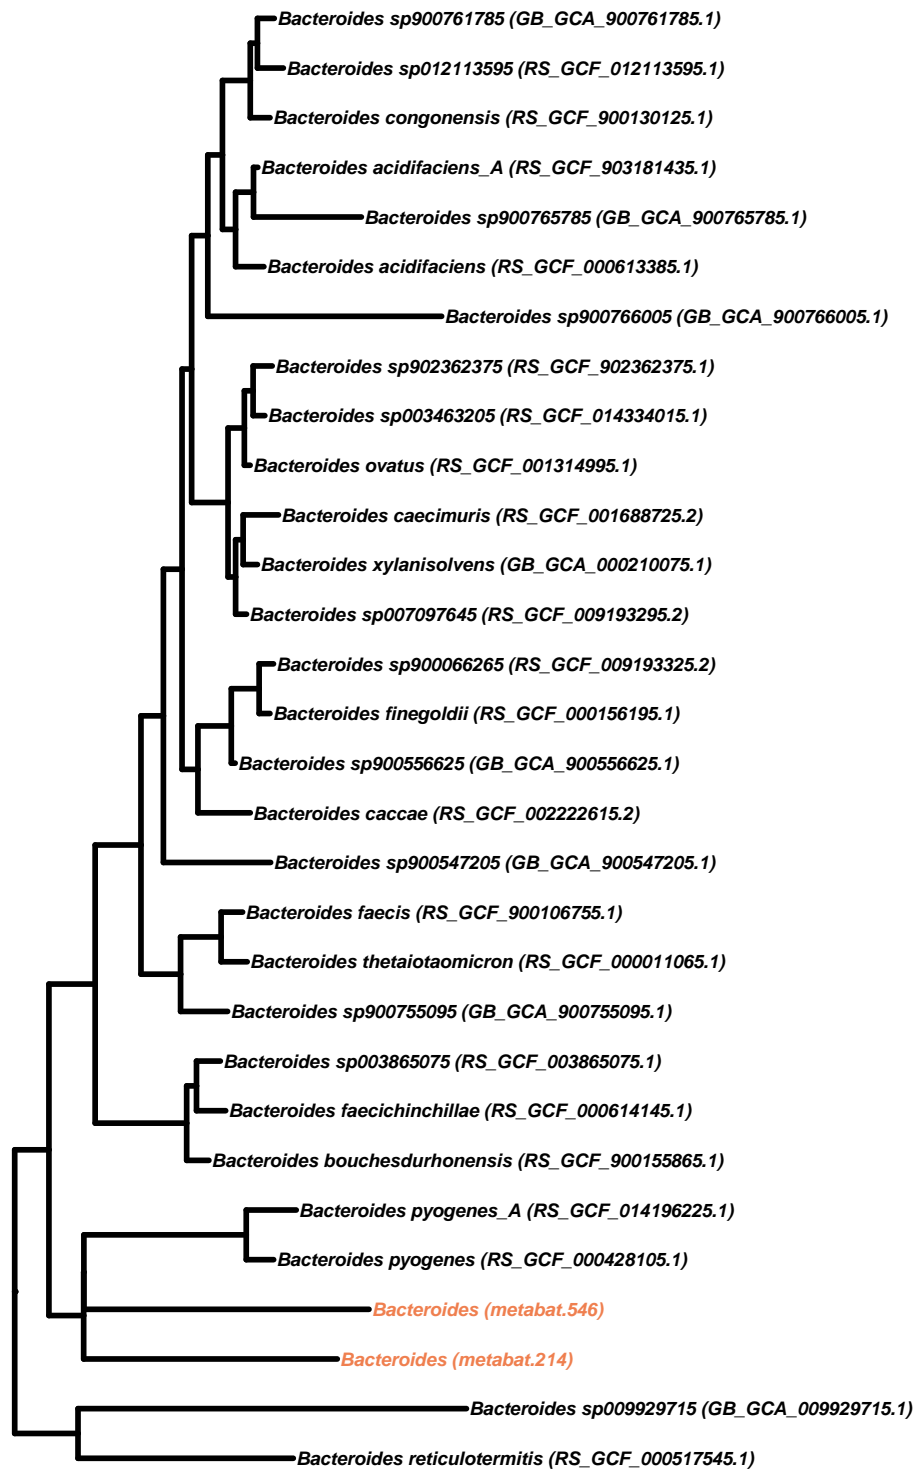

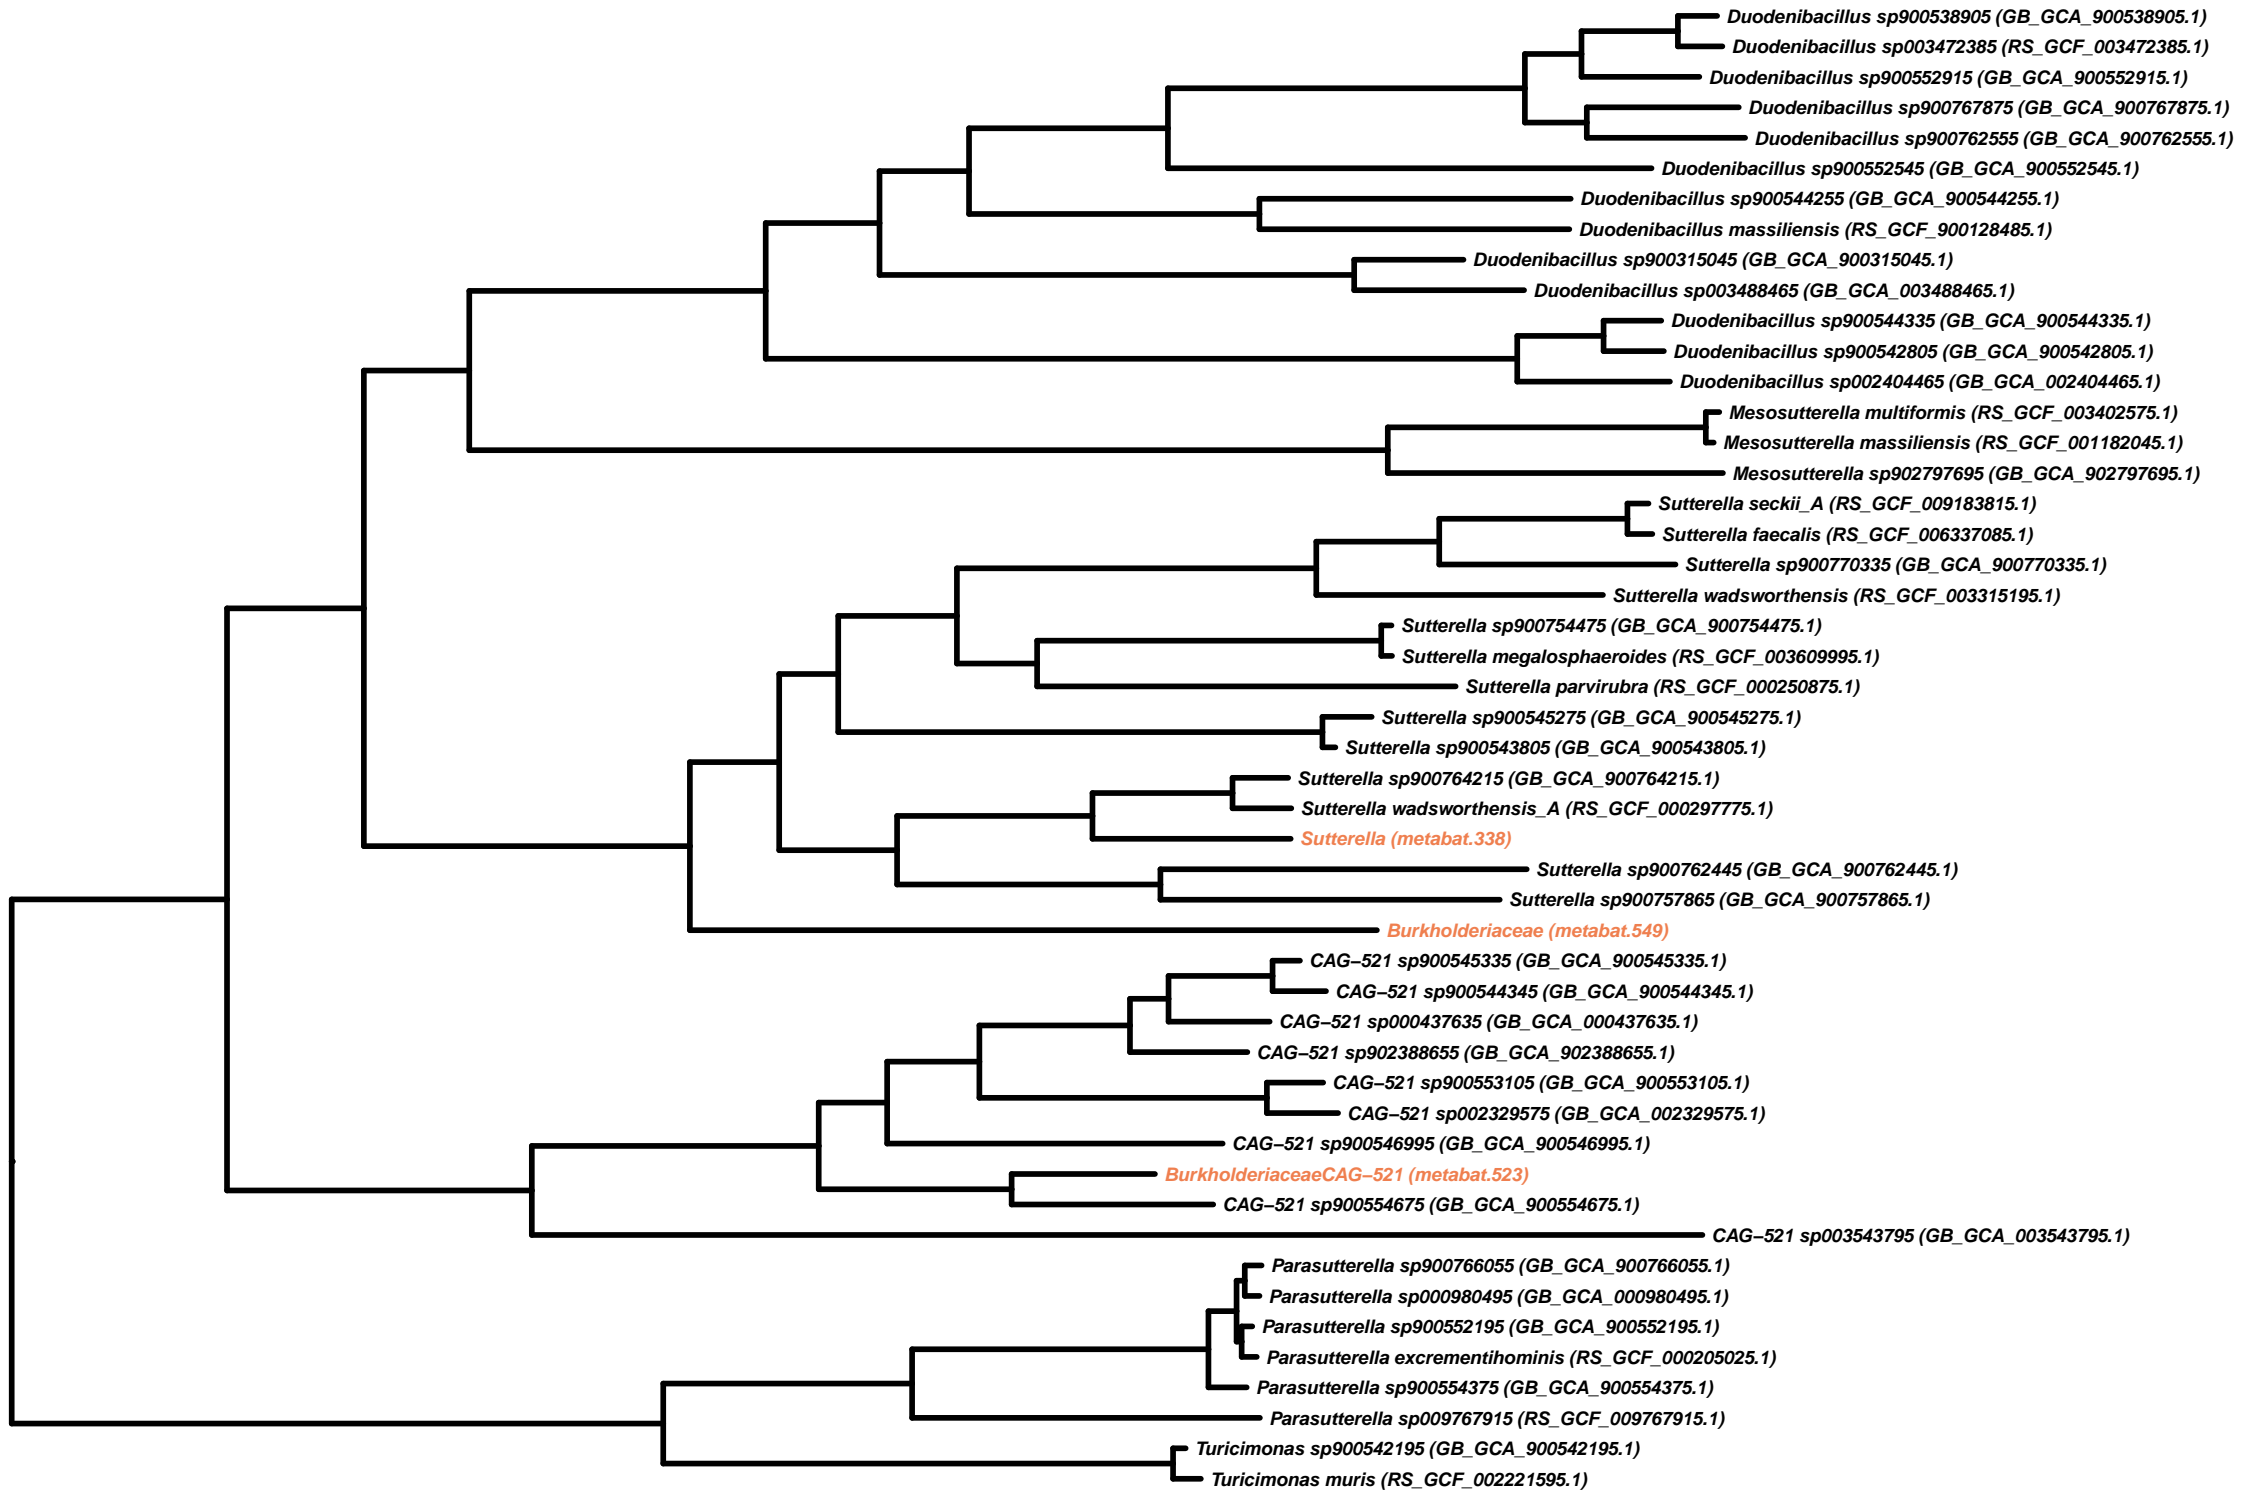

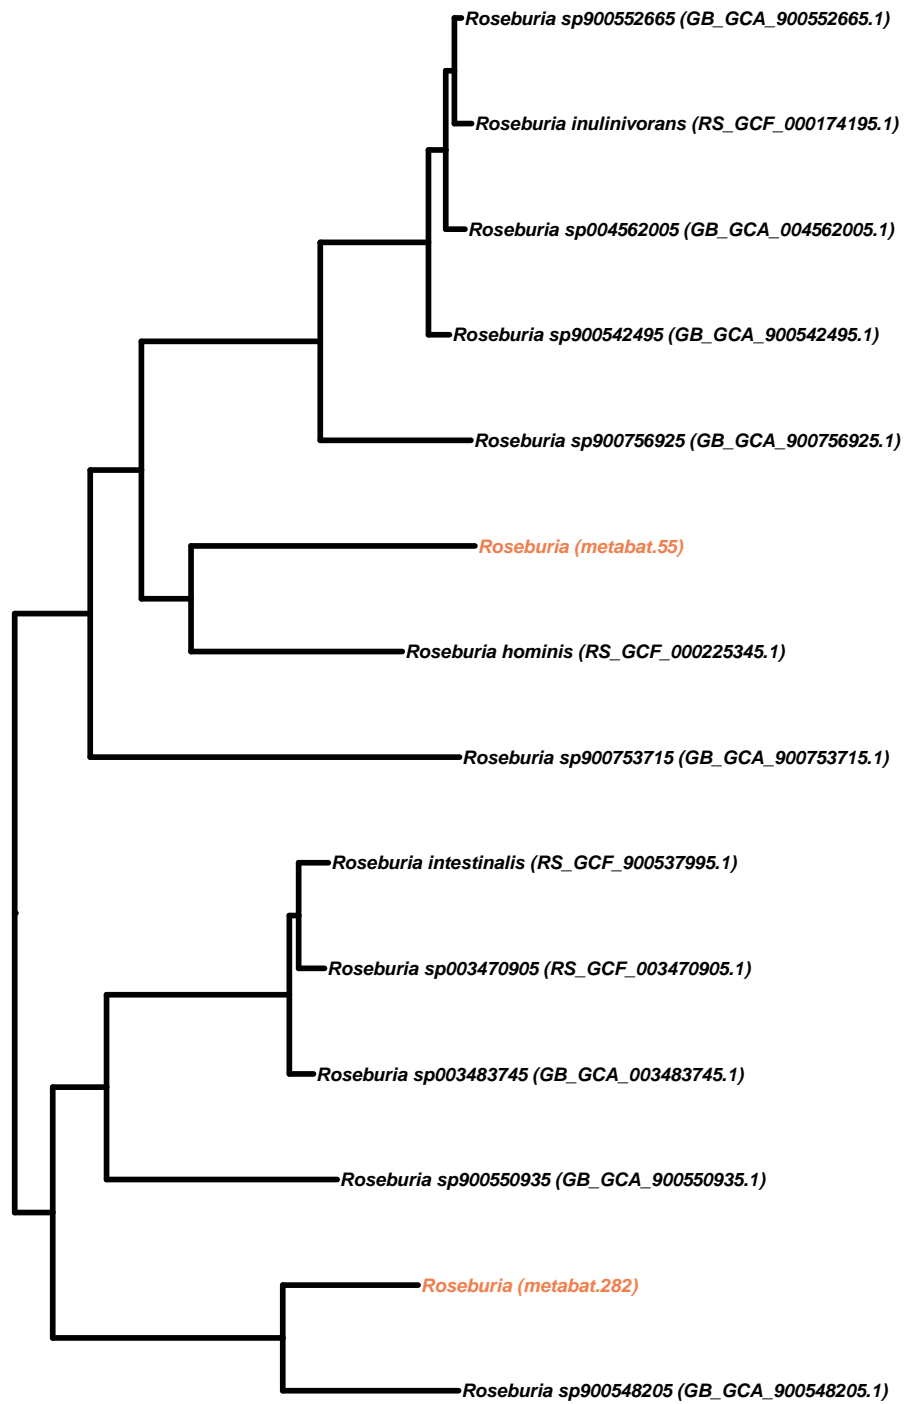

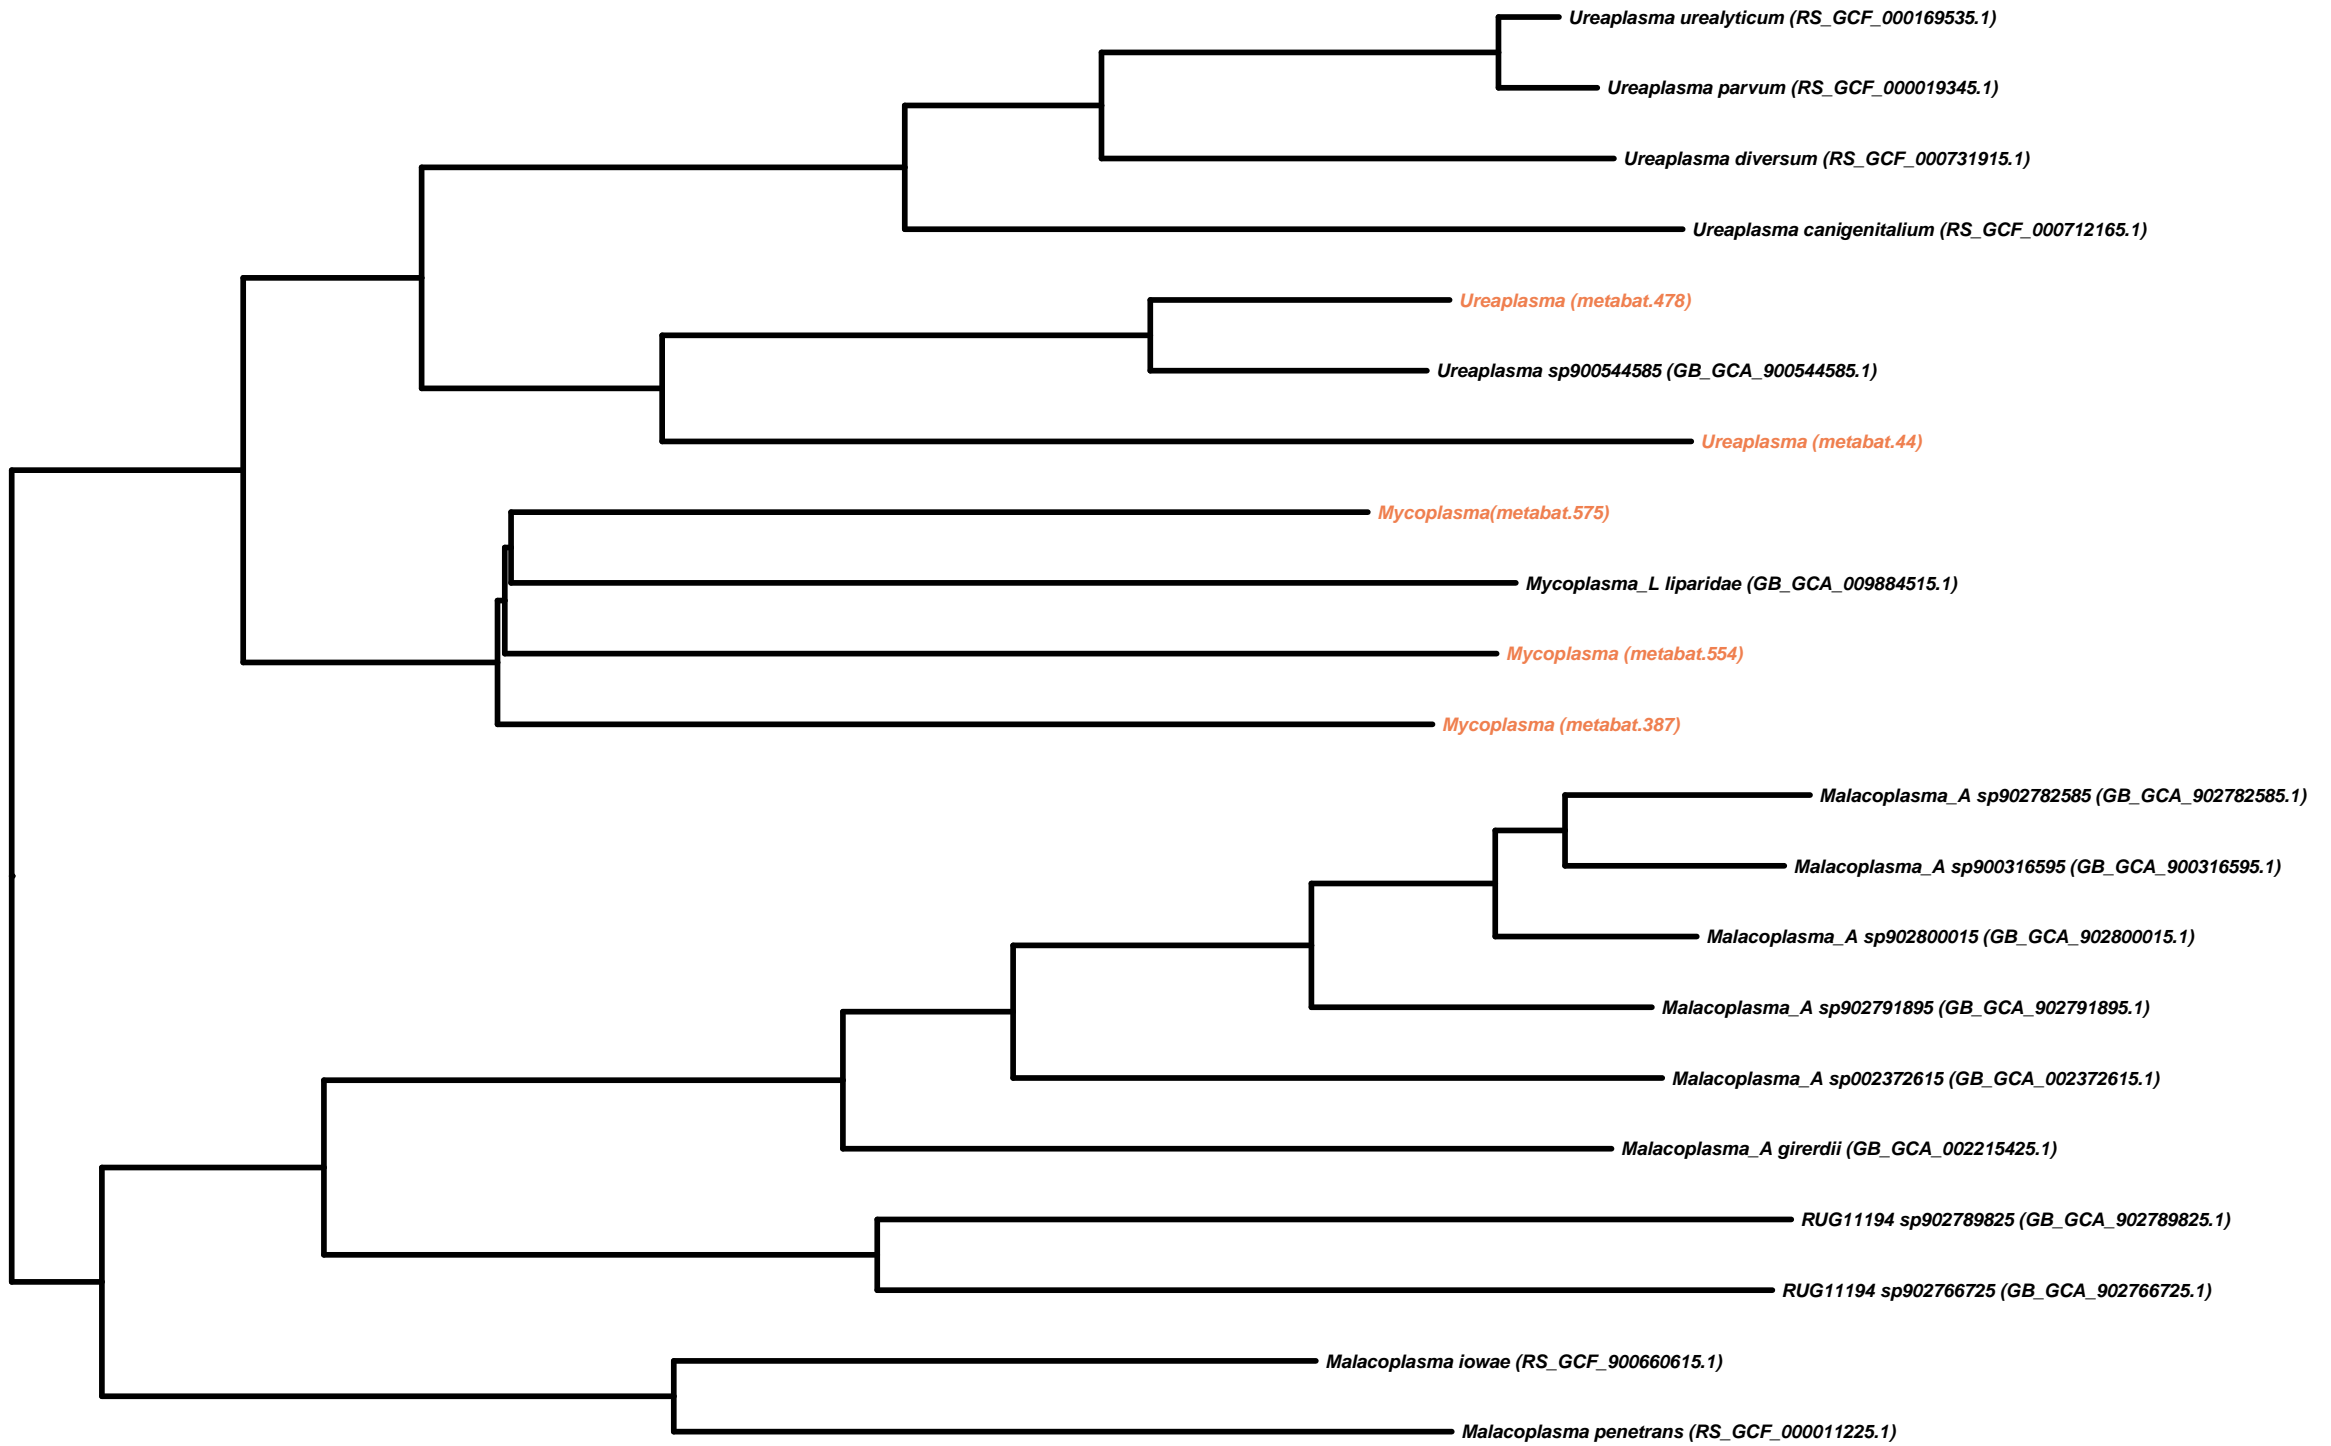



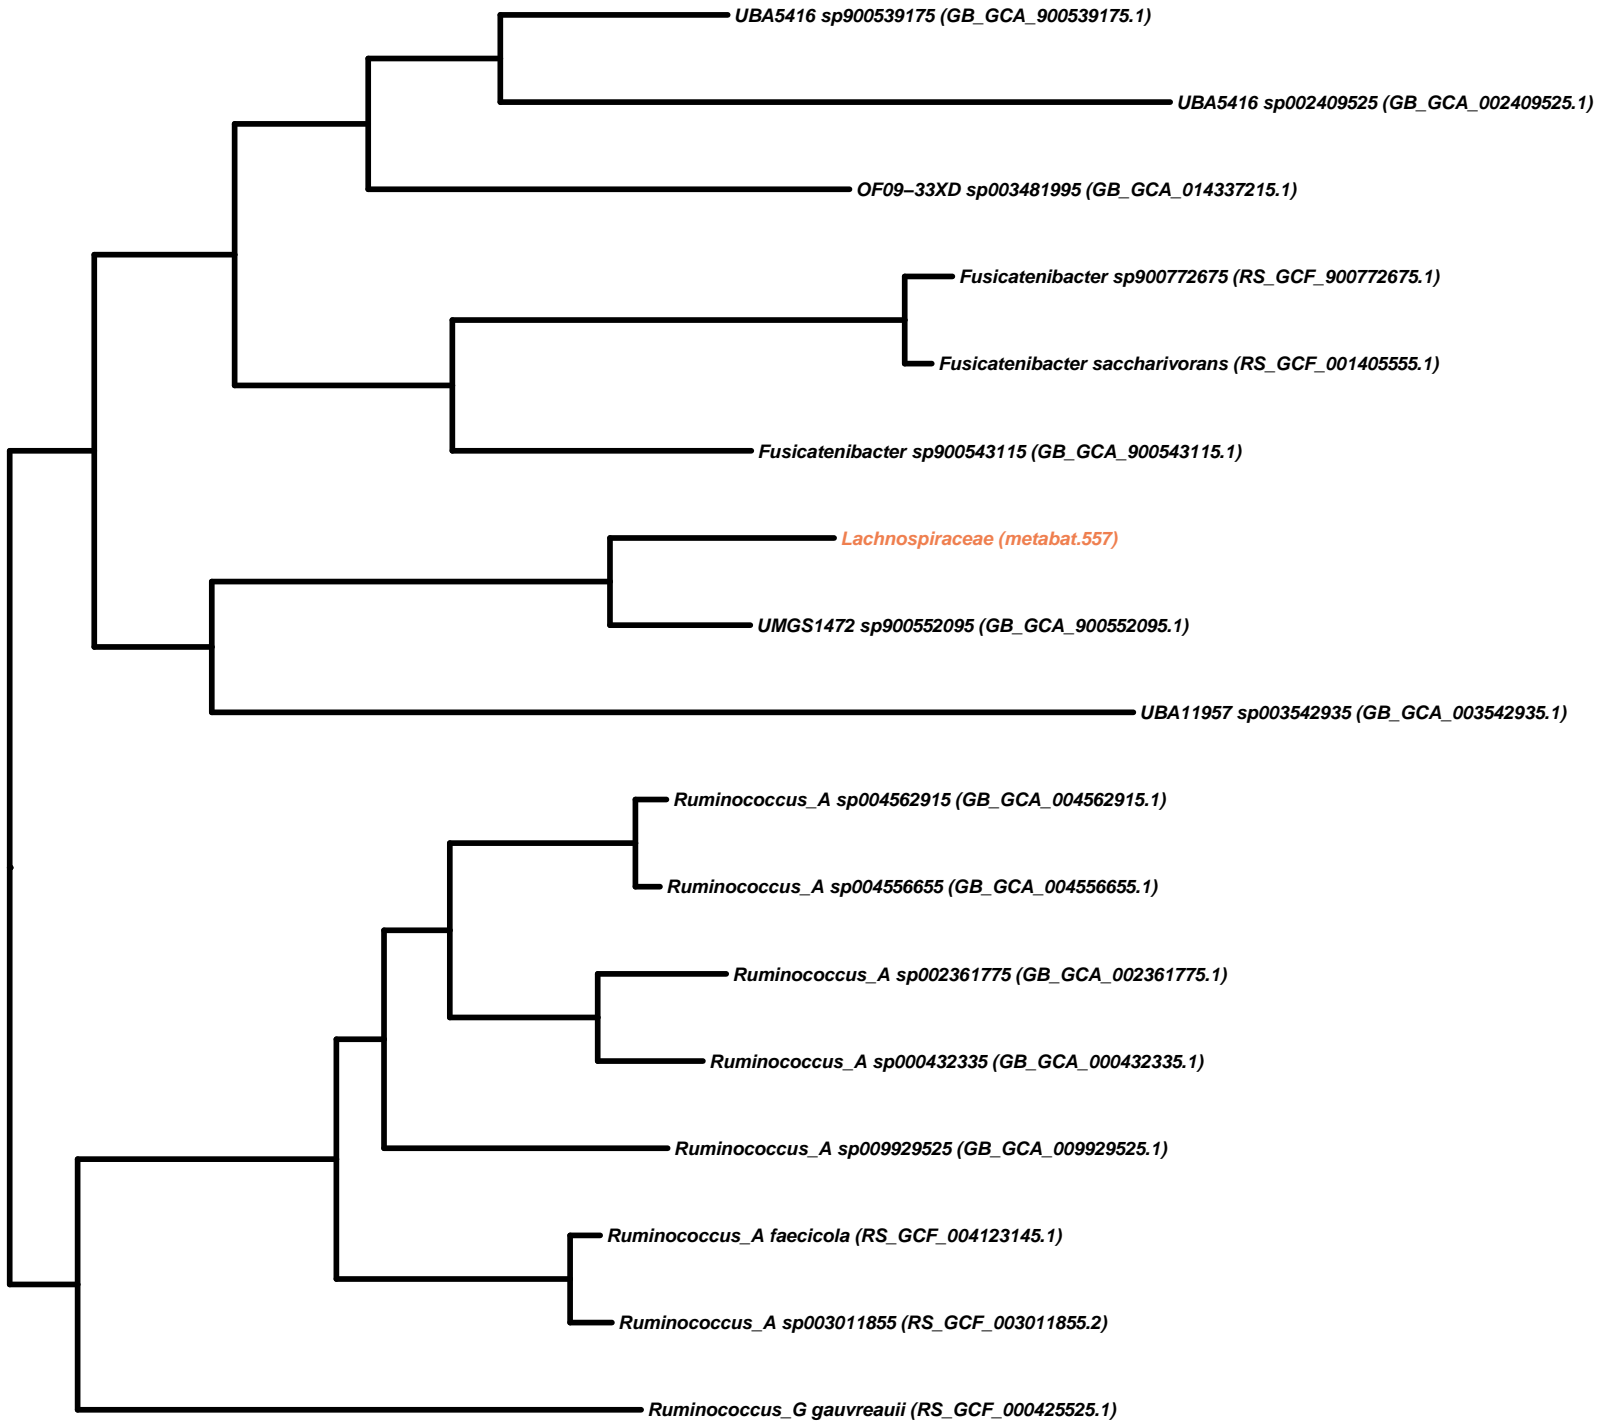

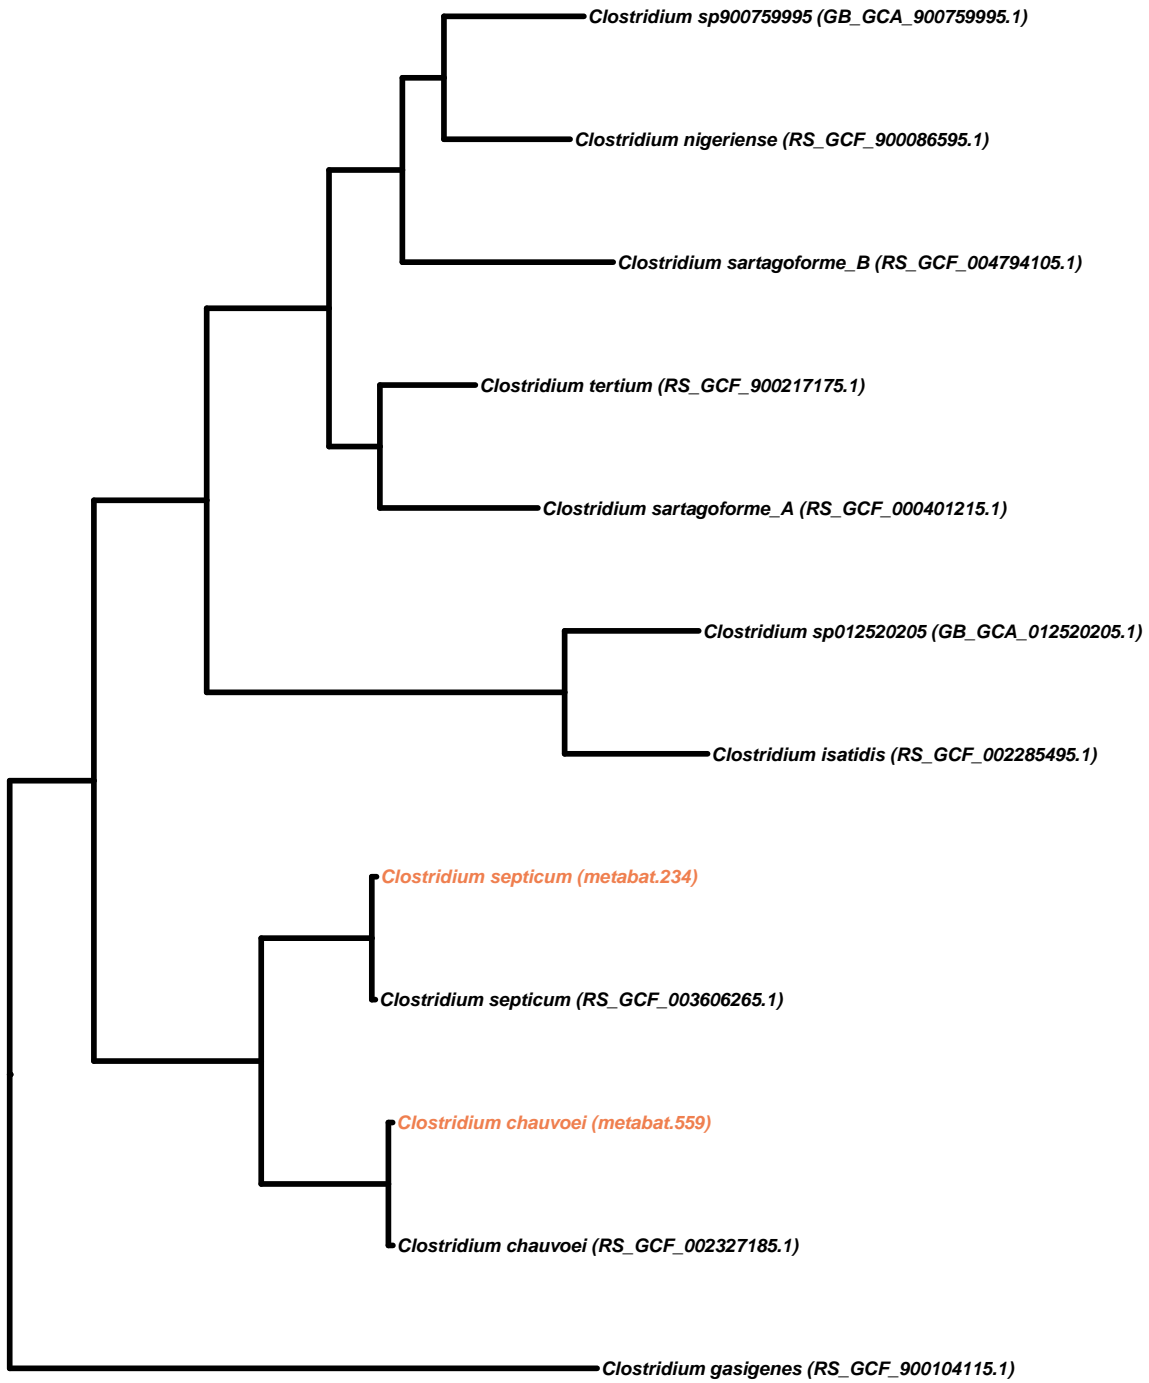

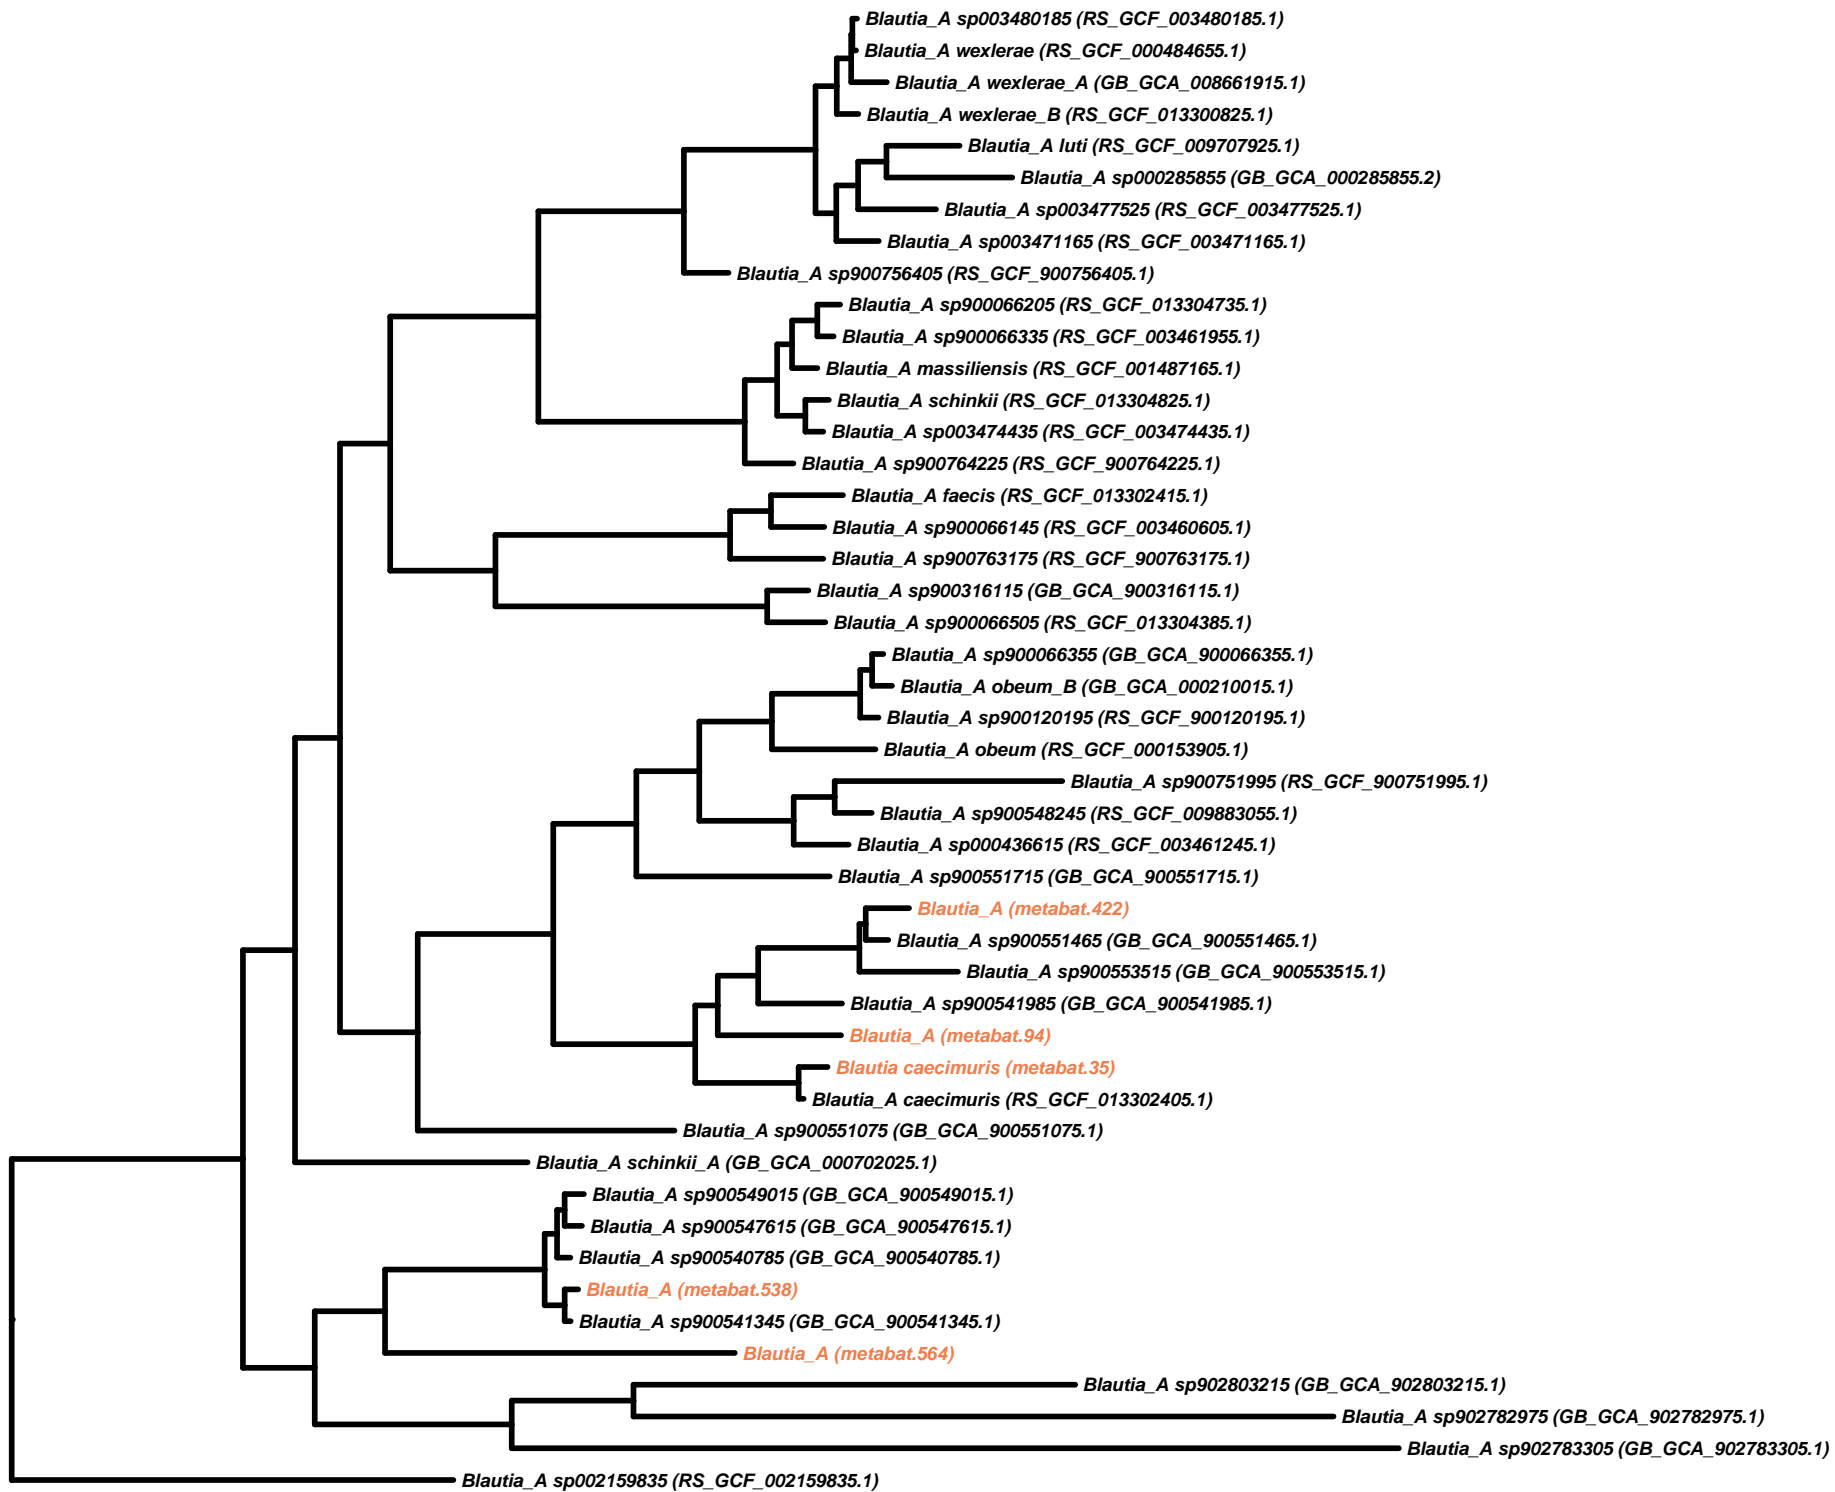

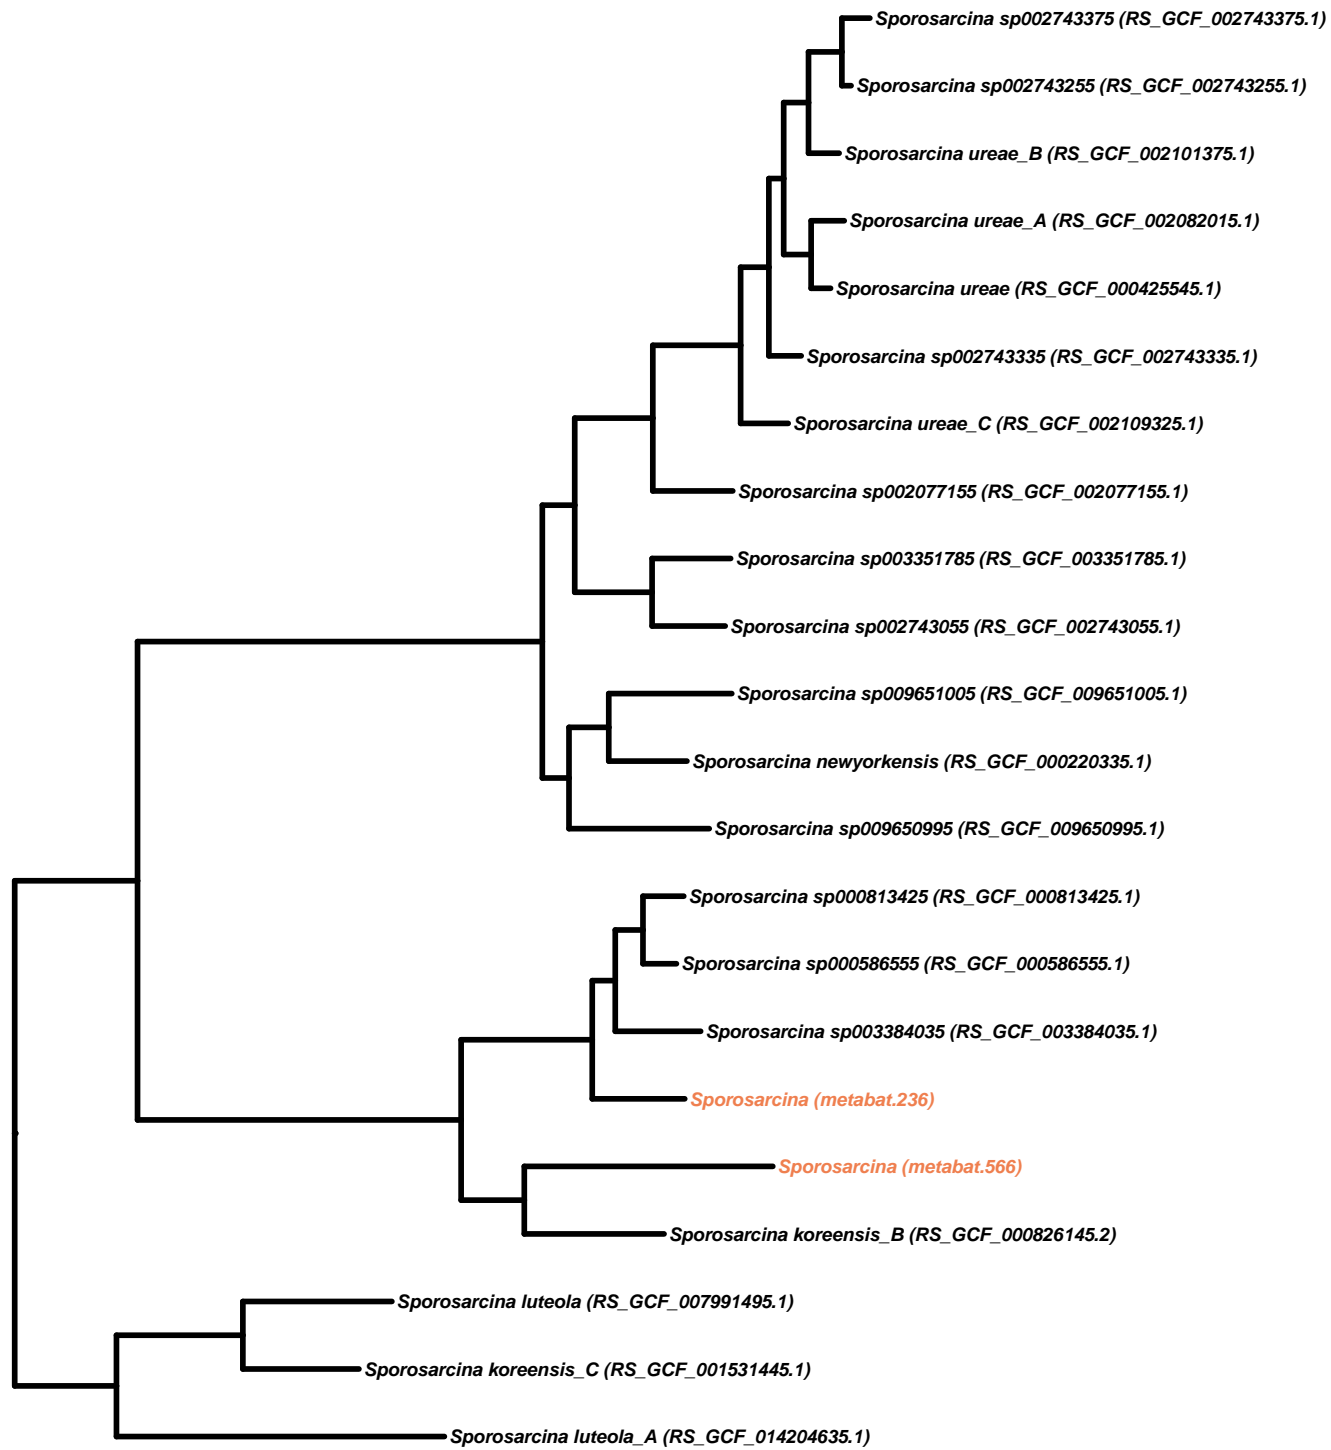

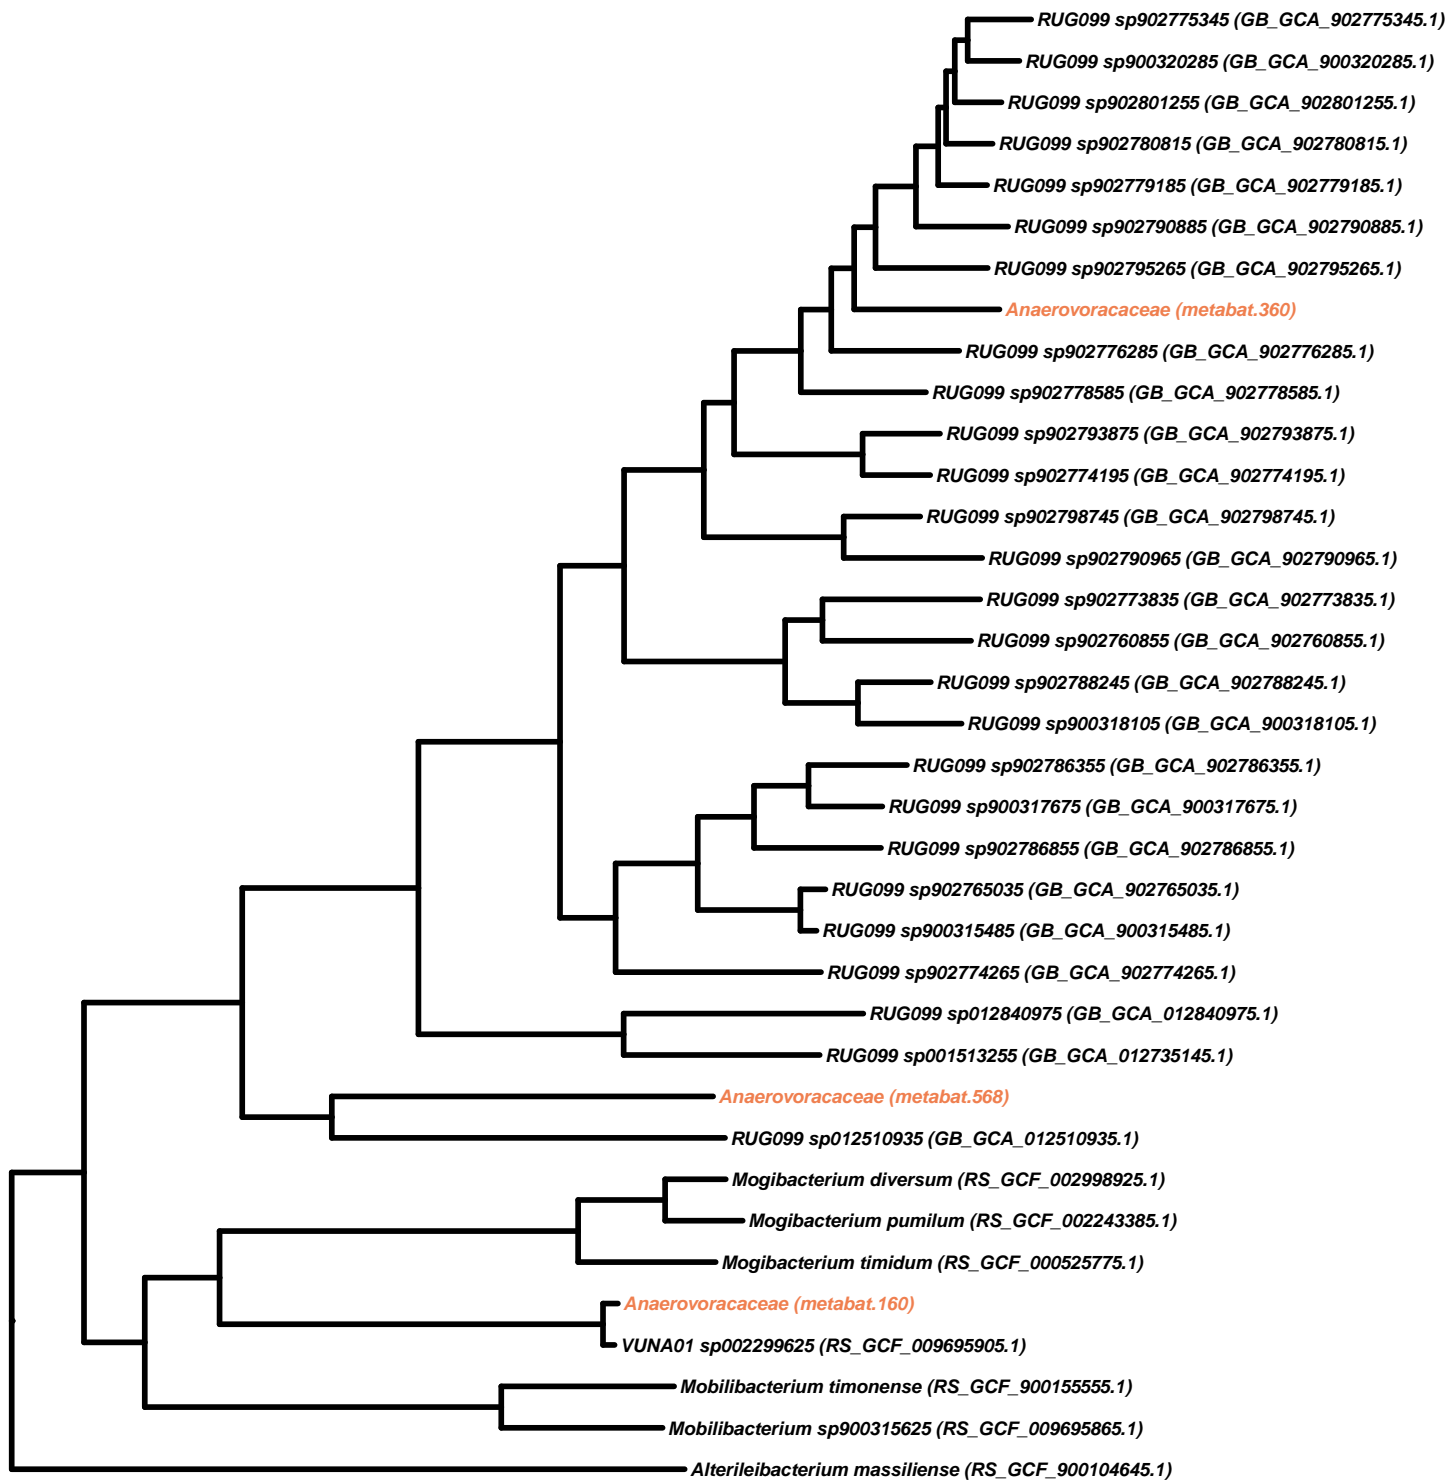

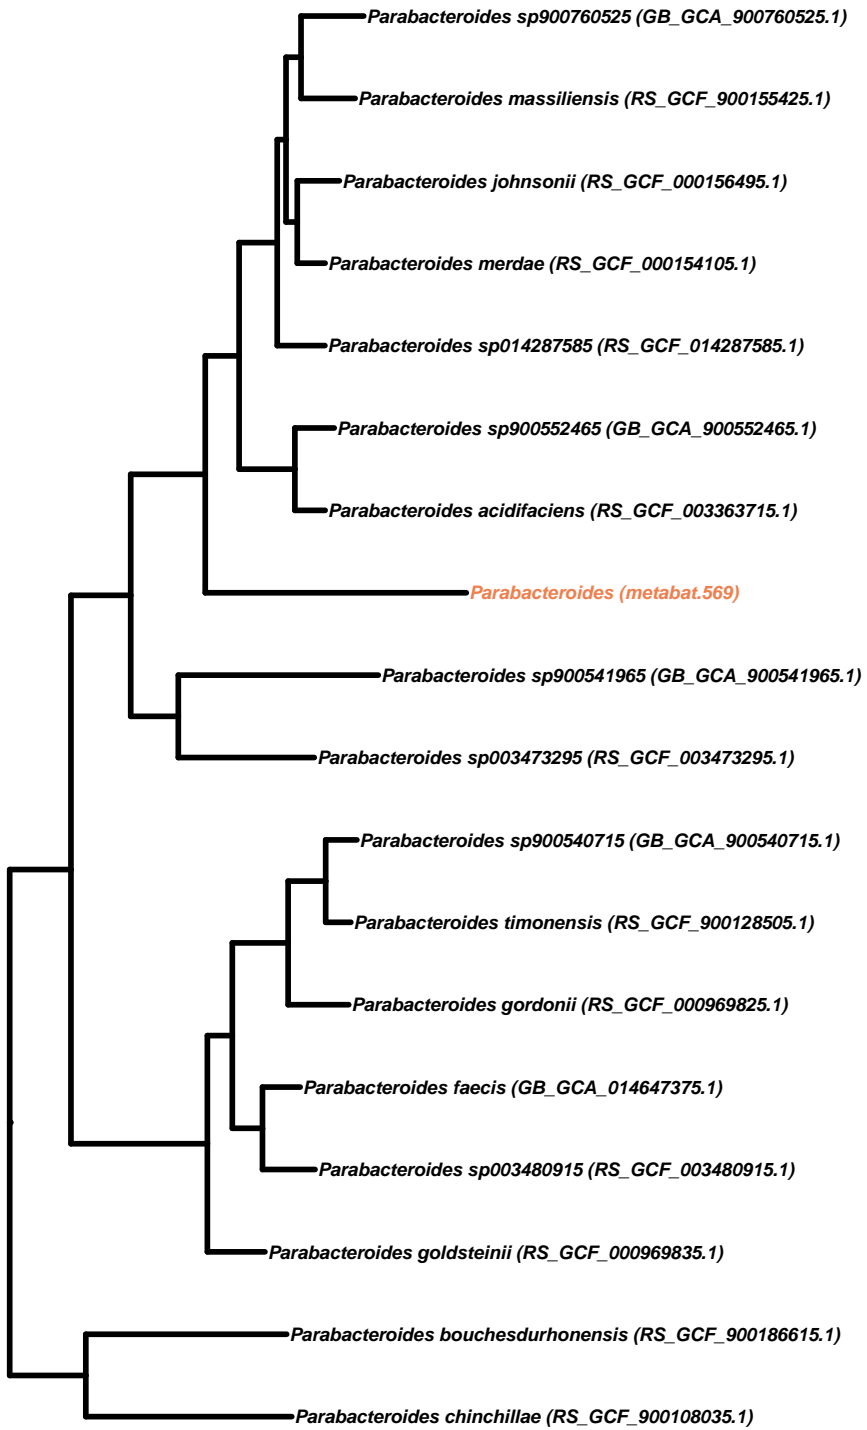

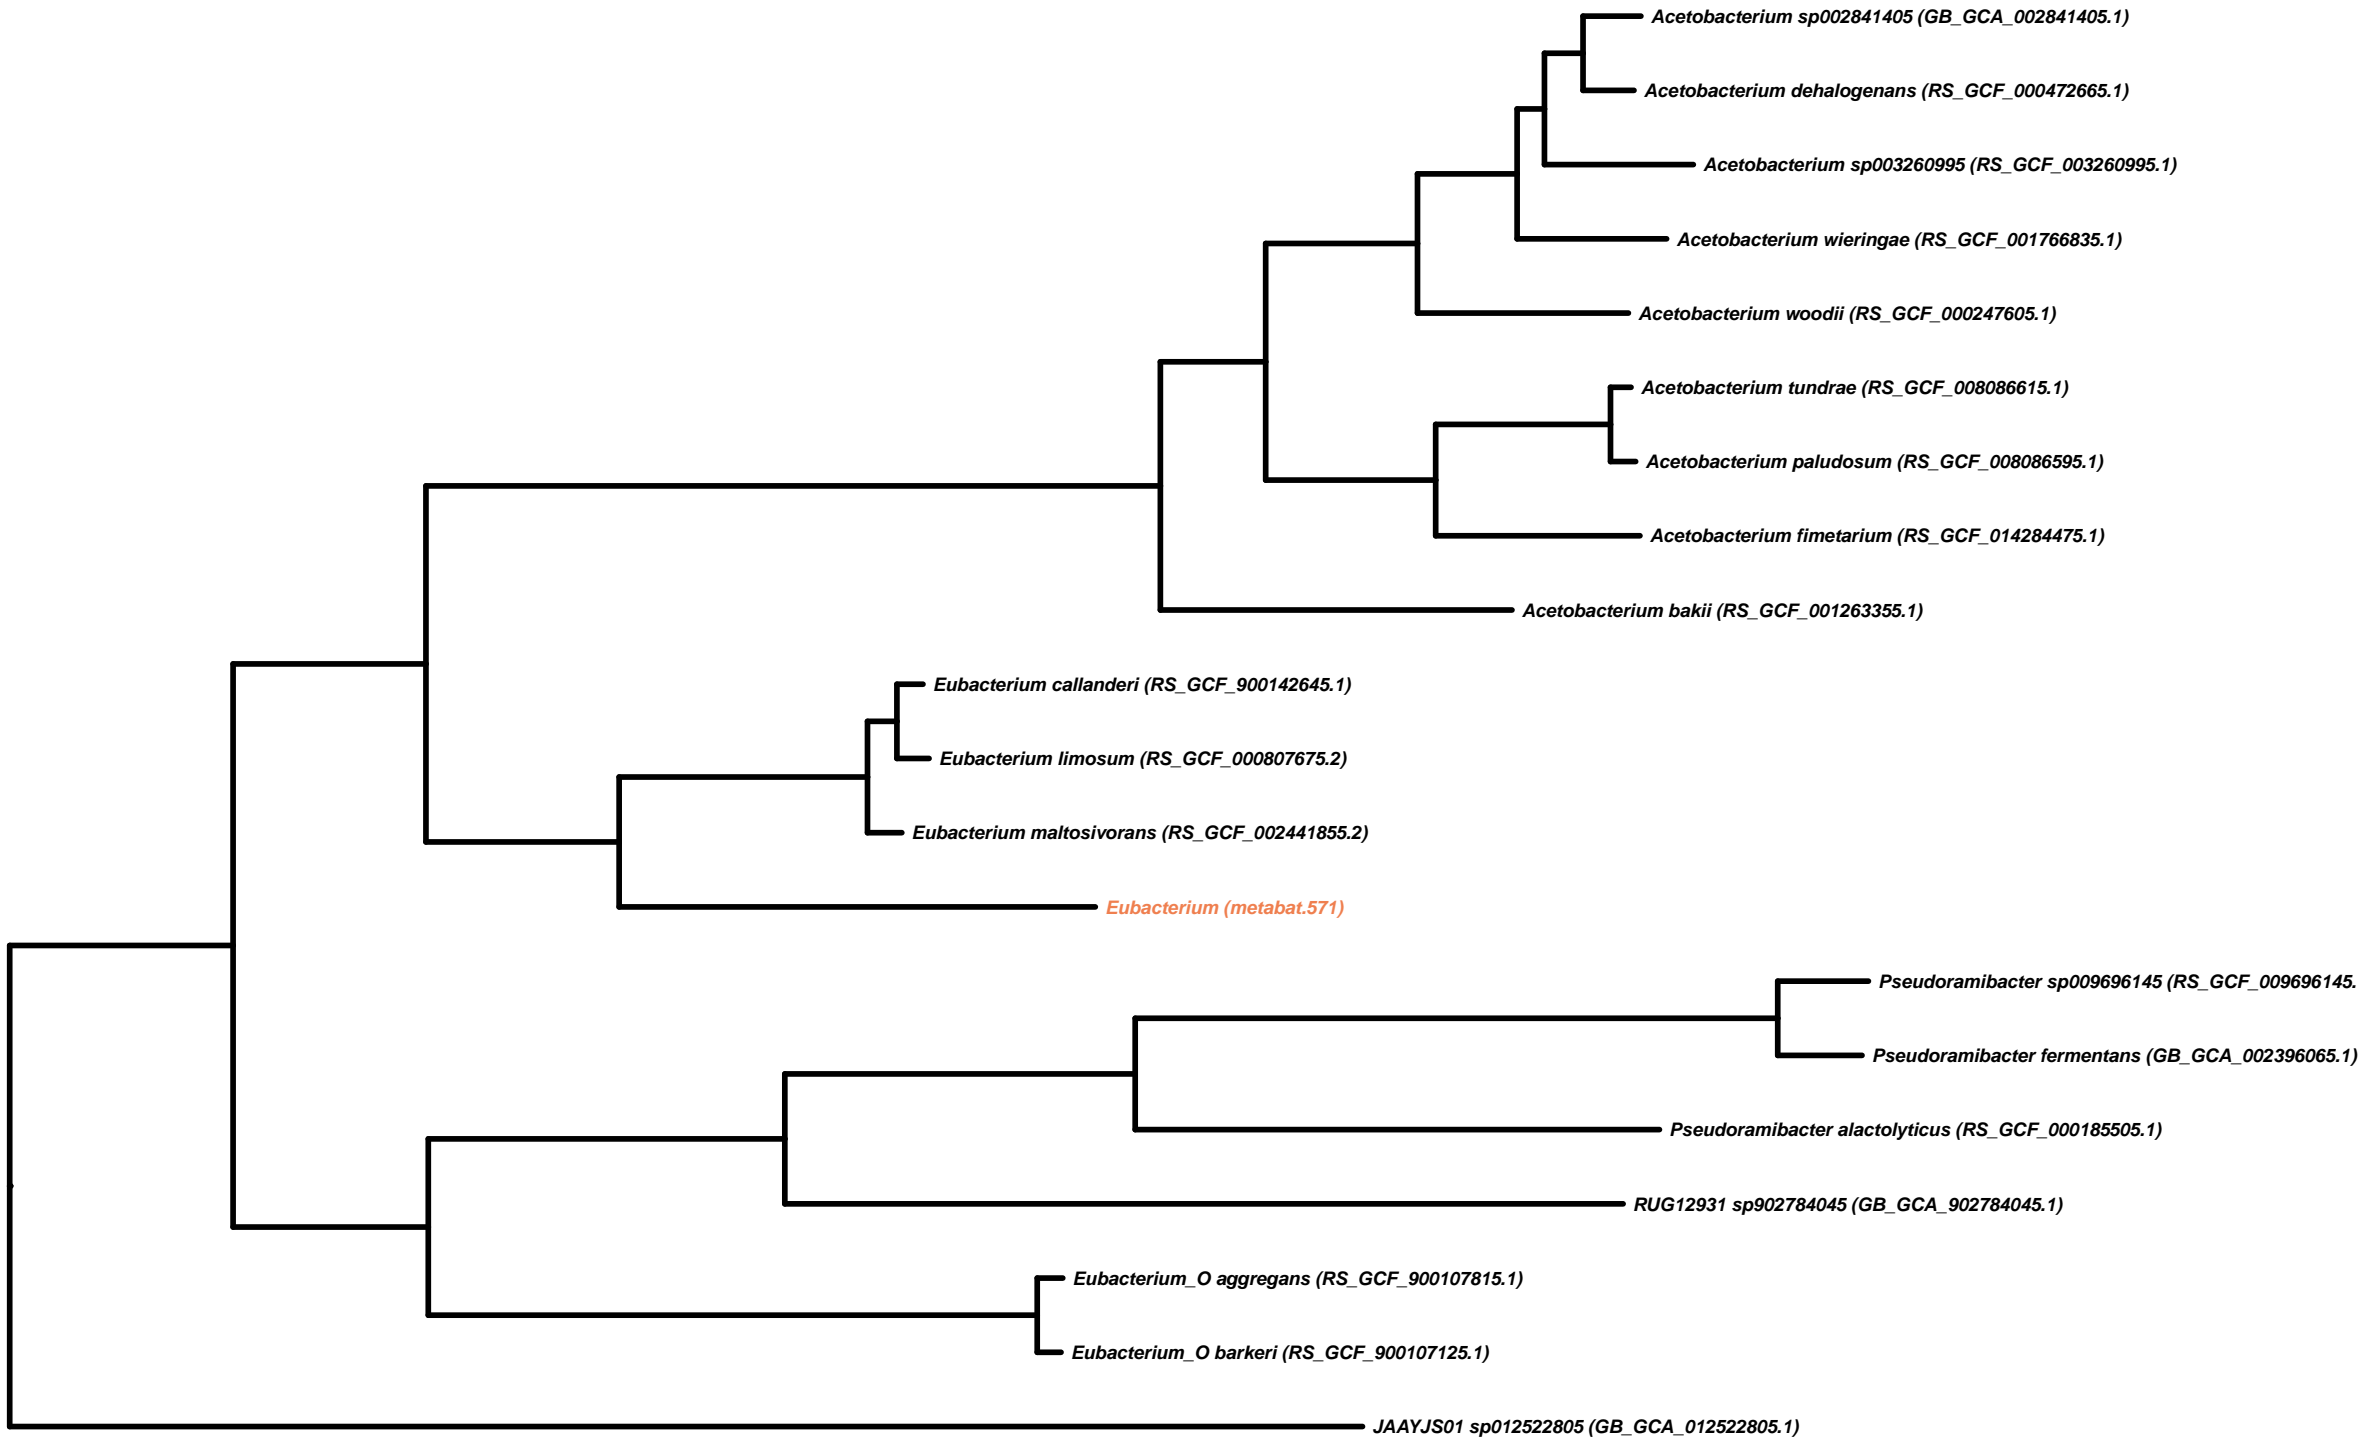

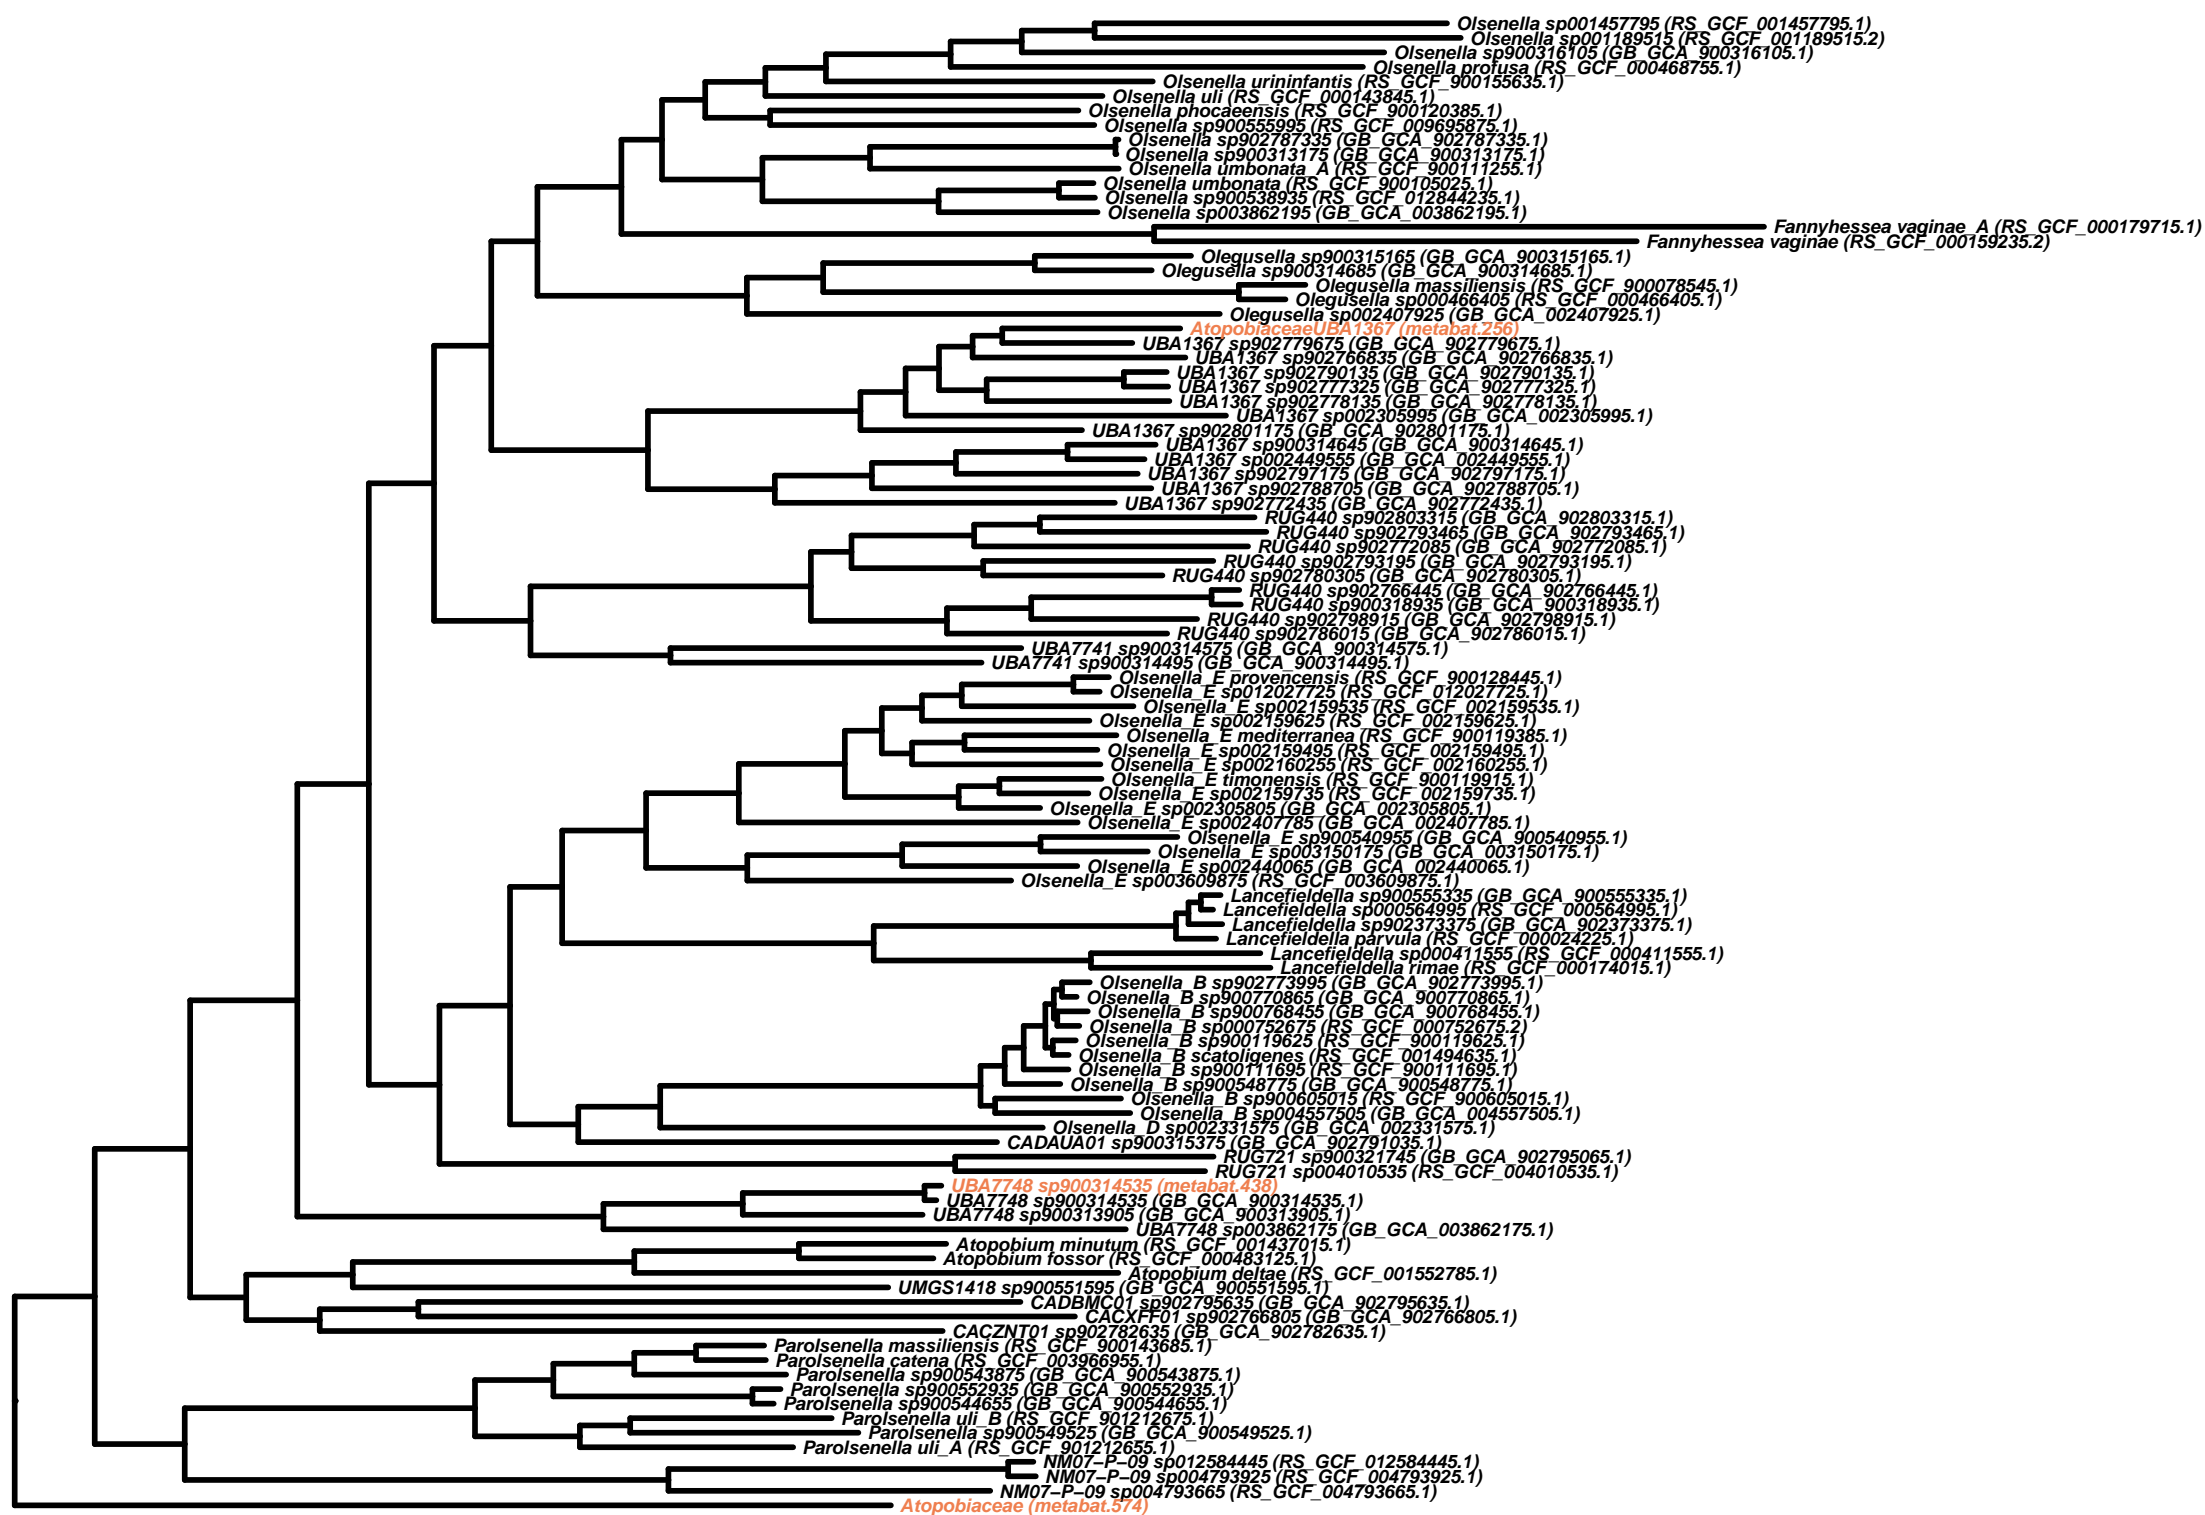



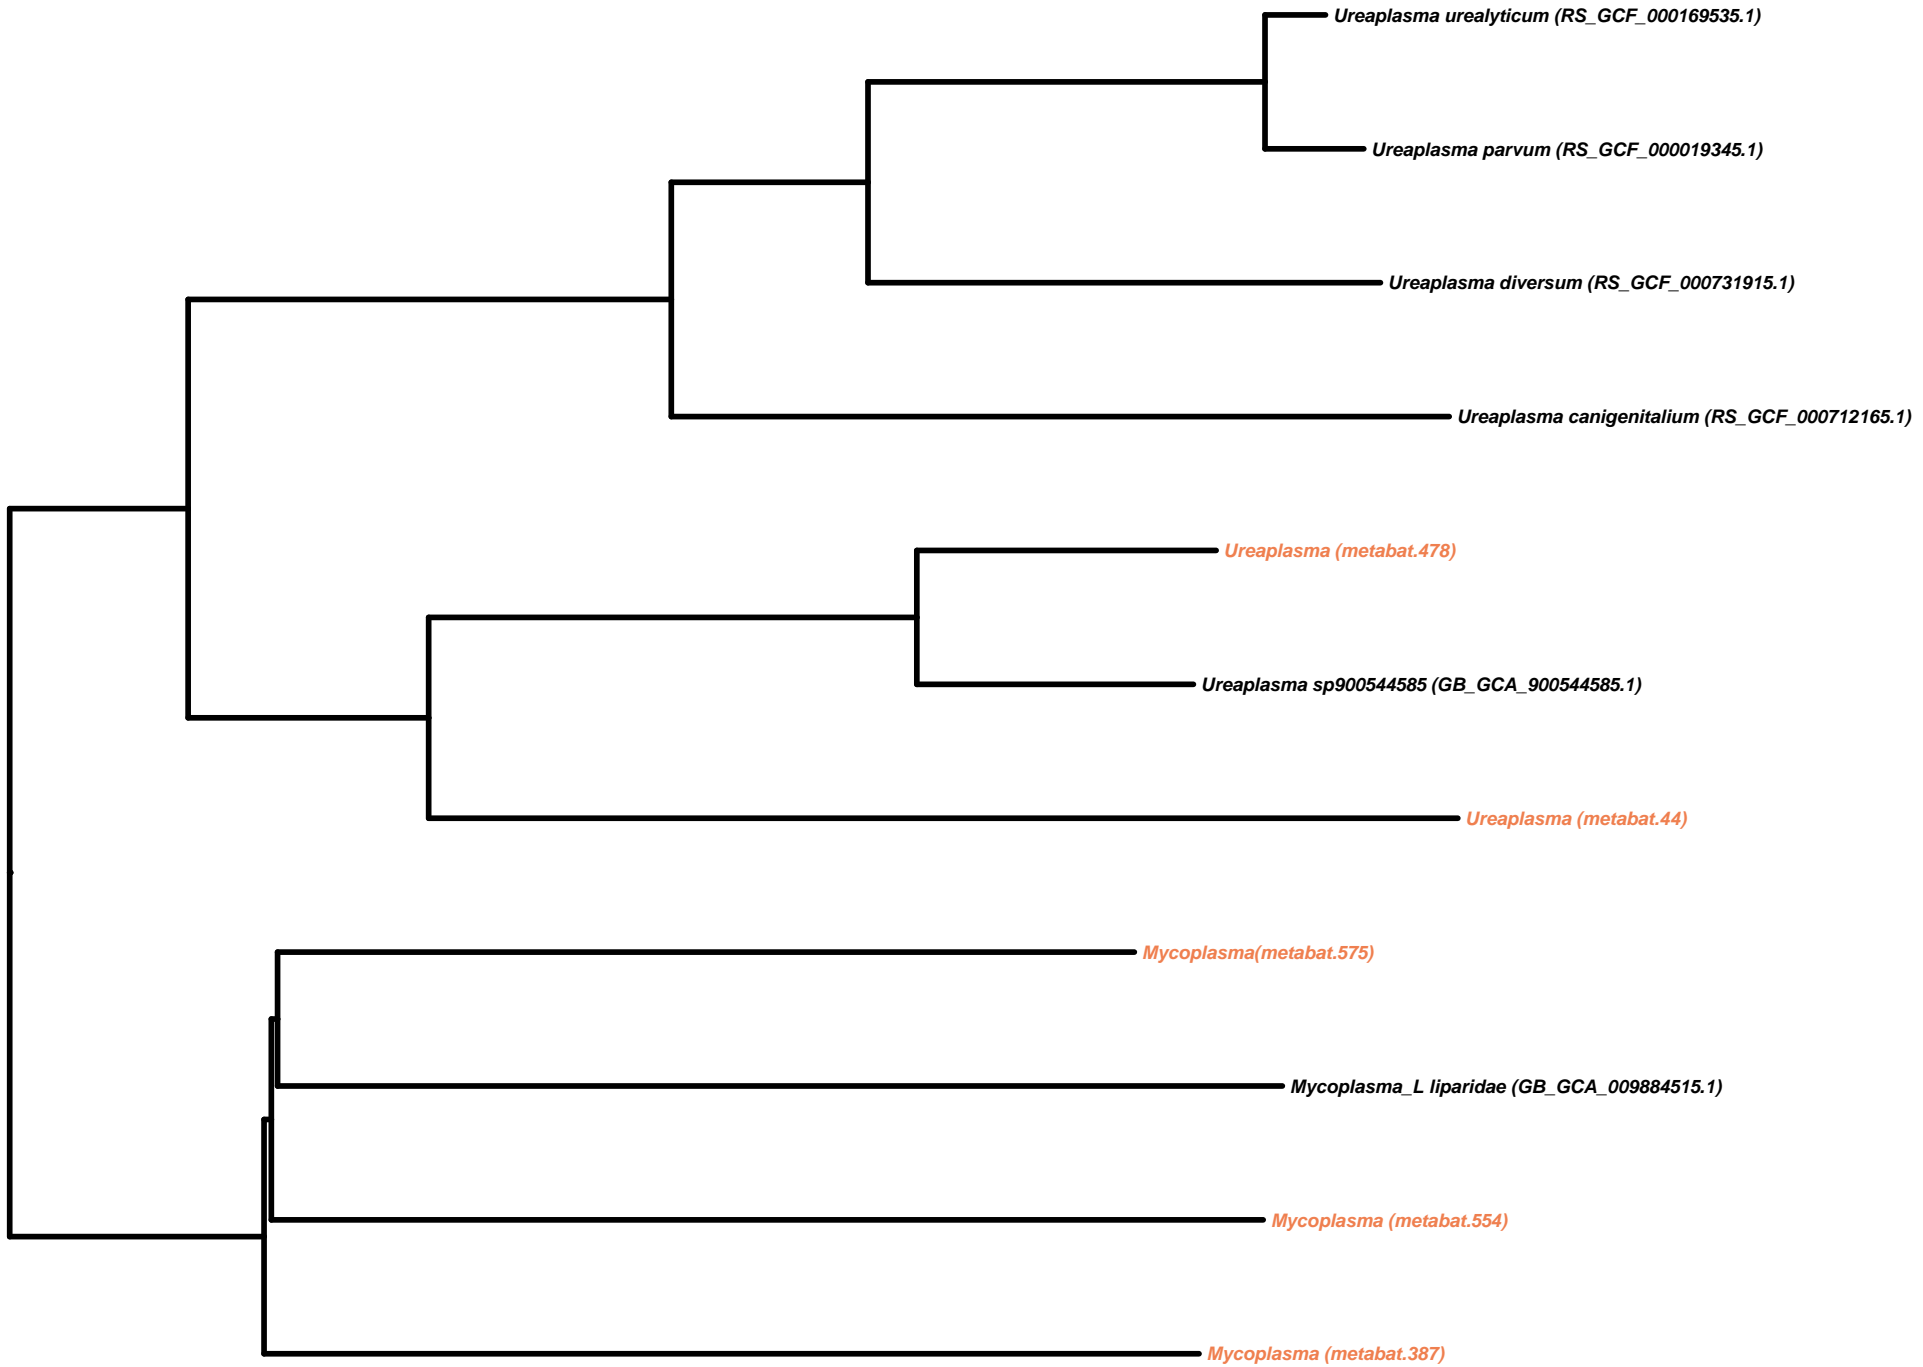

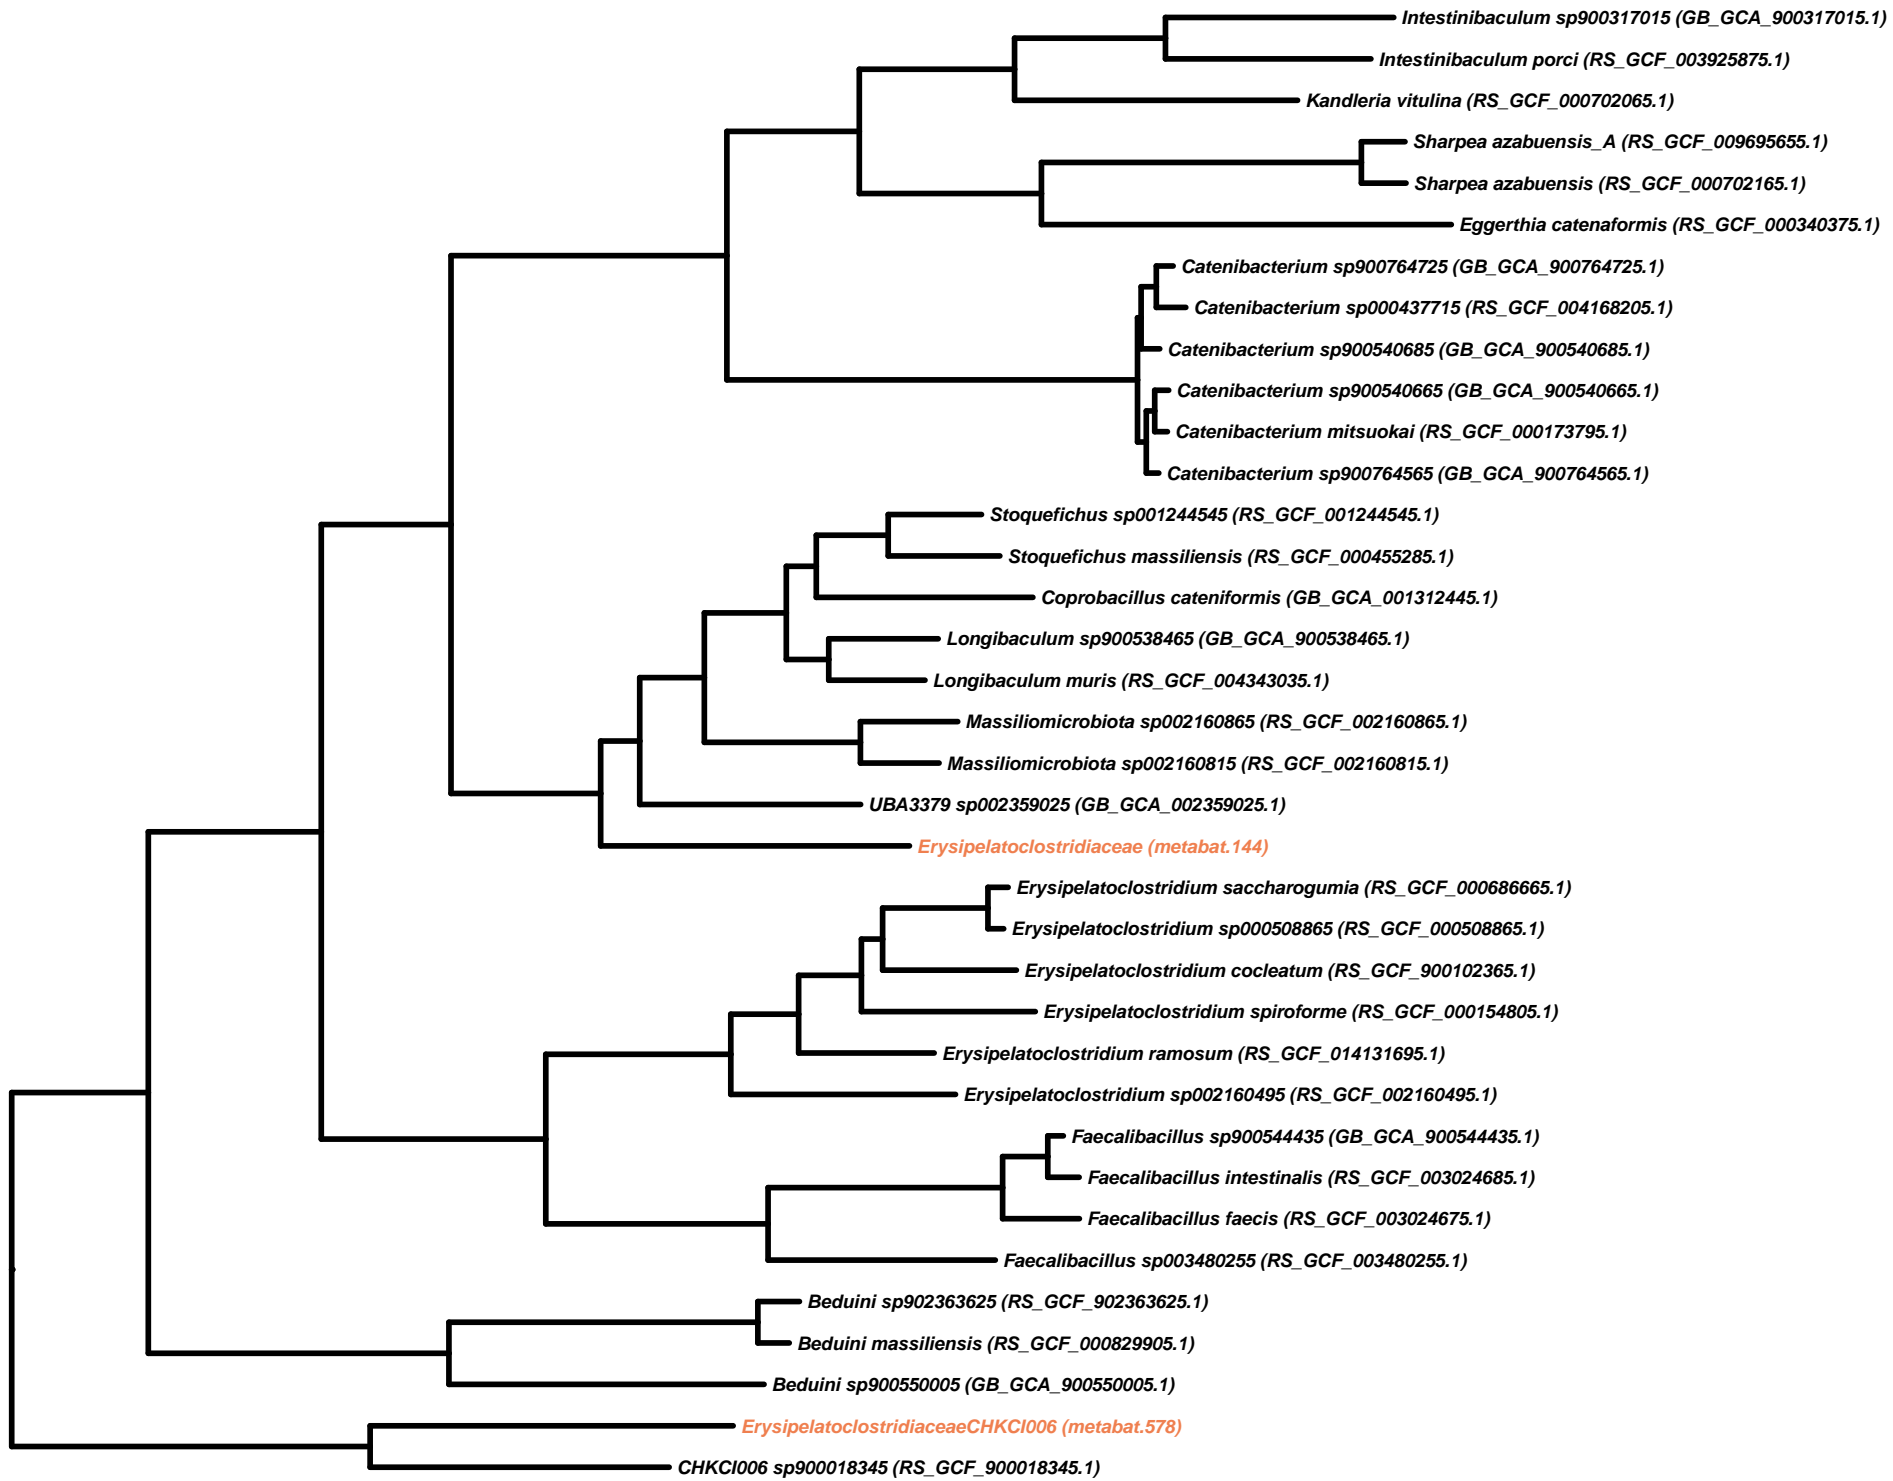

*Enterococcus\_B pernyi* (metabat.579)

*Enterococcus\_B pernyi* (RS\_GCF\_013394305.1)

*Enterococcus\_B mundtii\_B* (RS\_GCF\_002947535.1)

*Enterococcus\_B mundtii* (RS\_GCF\_002813755.1)

*Enterococcus\_B mundtii\_C* (RS\_GCF\_003957375.1)

*Enterococcus\_B sp002140175* (RS\_GCF\_002140175.1)

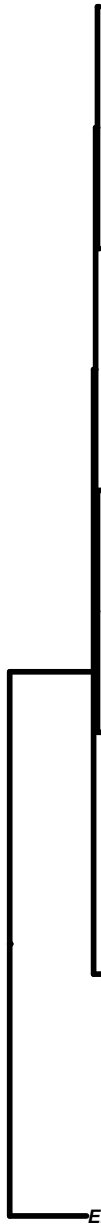

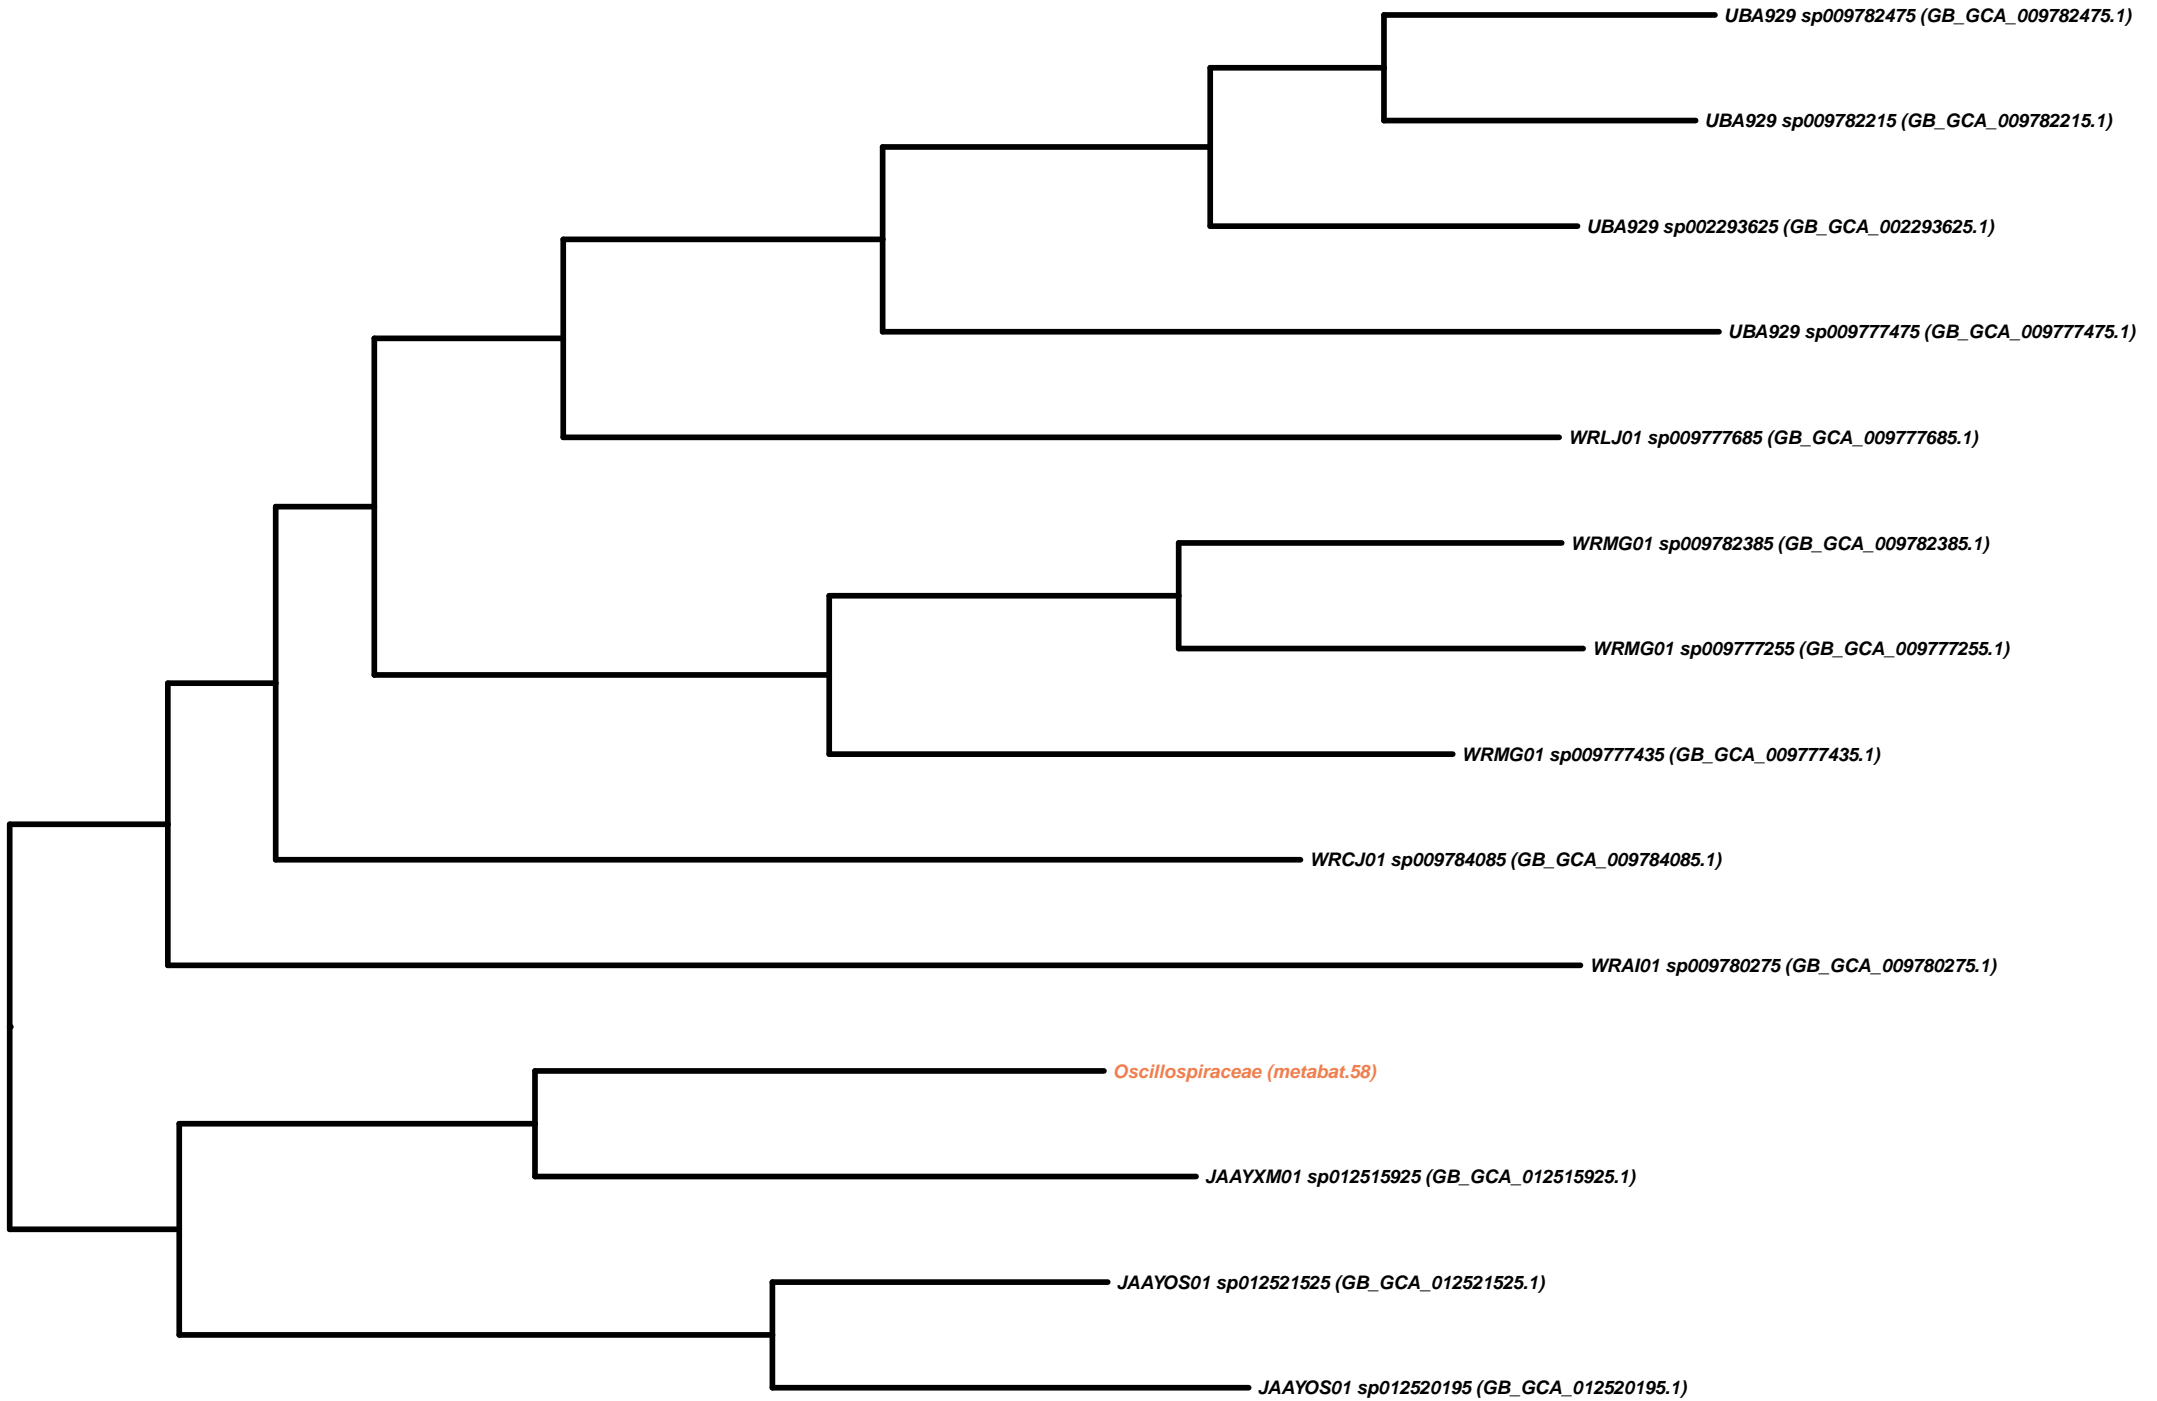

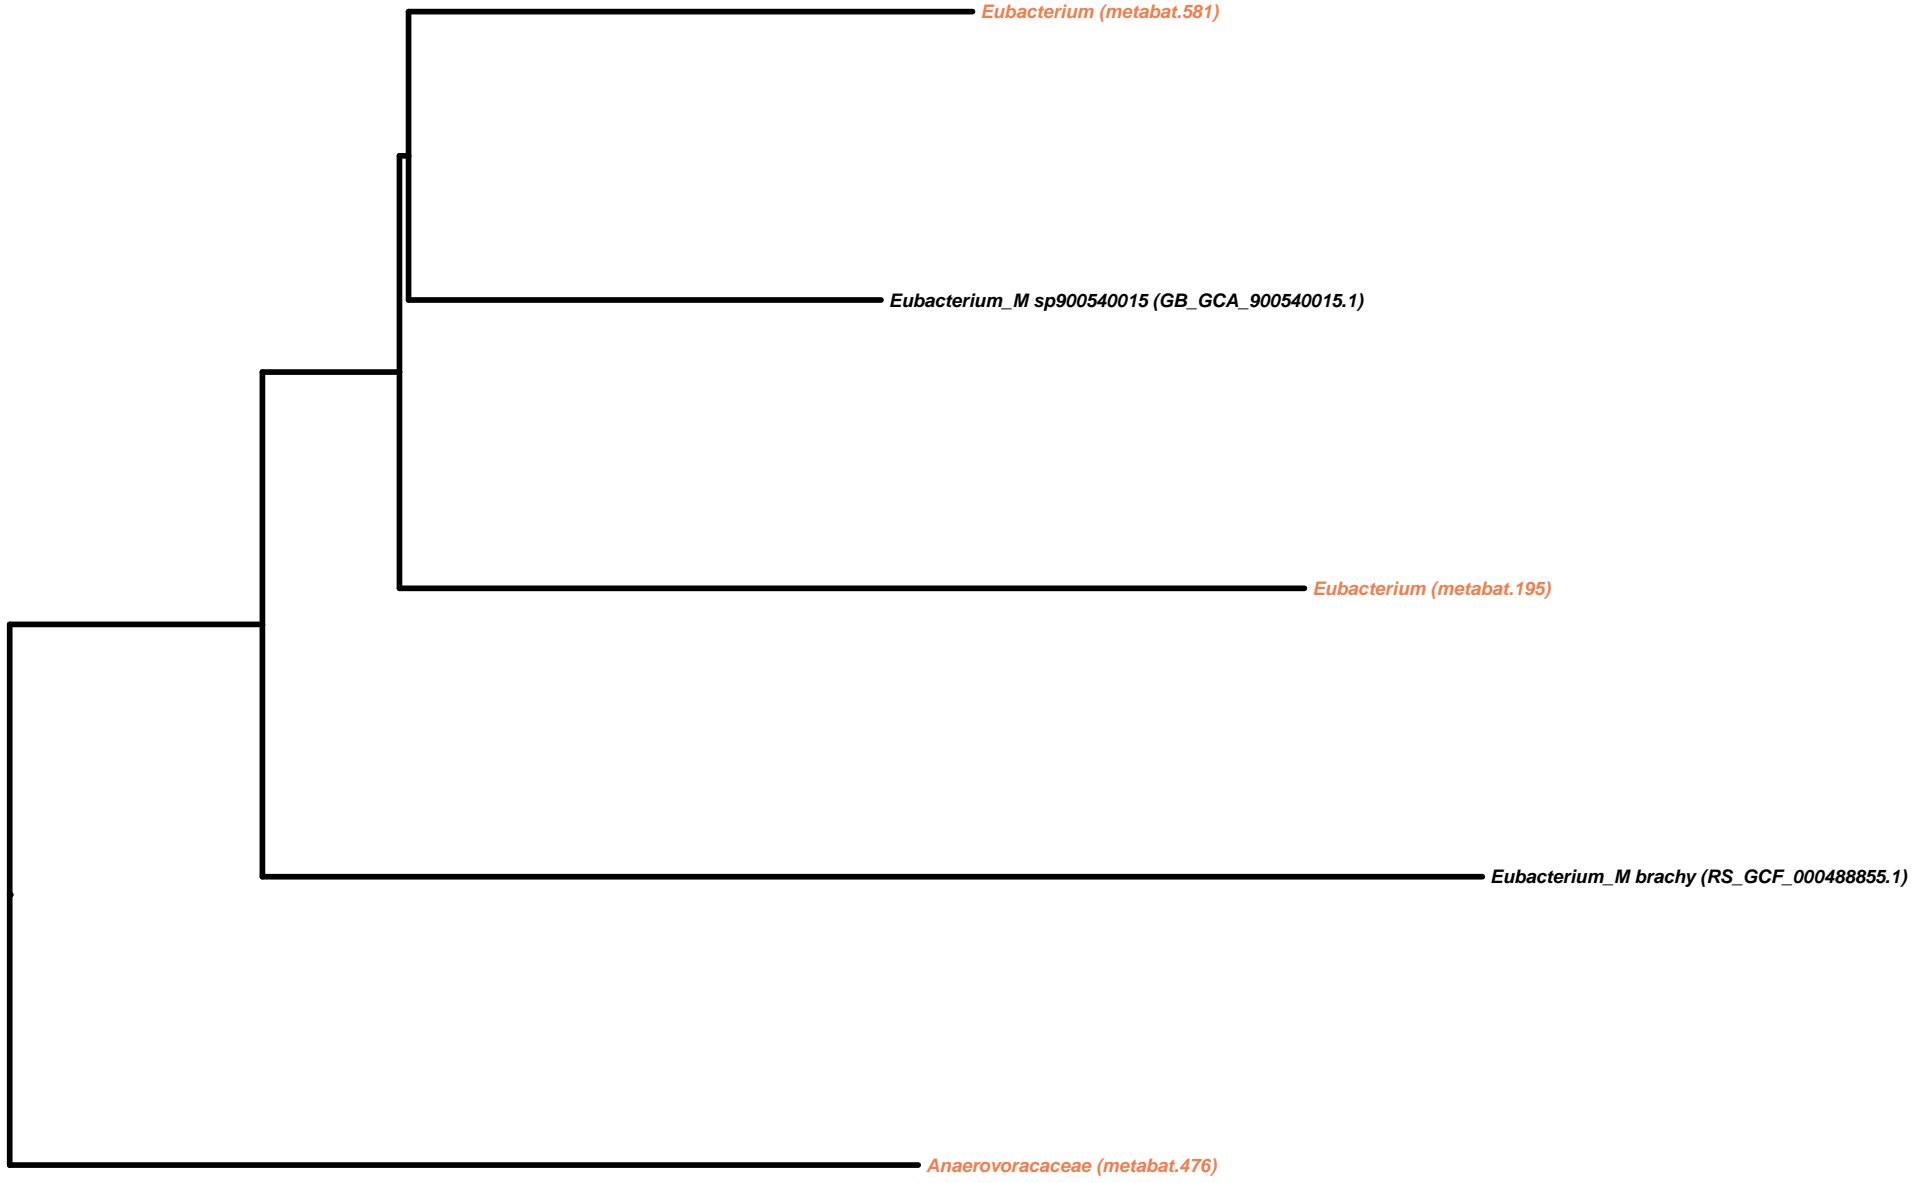

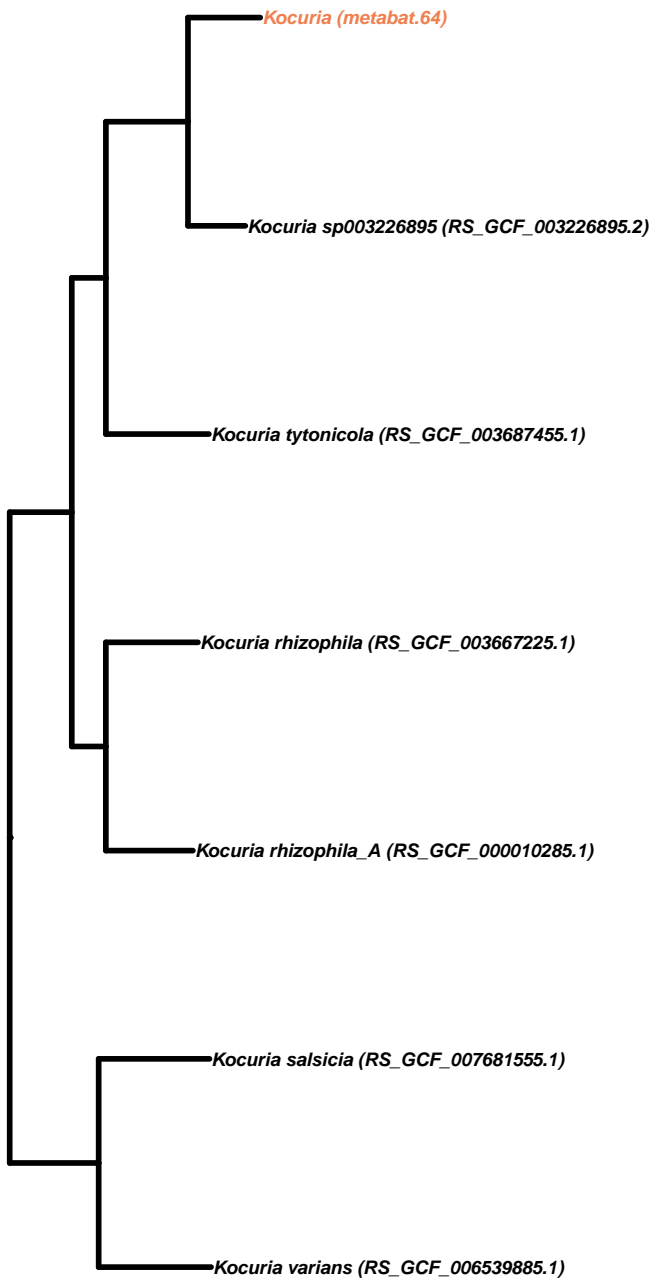

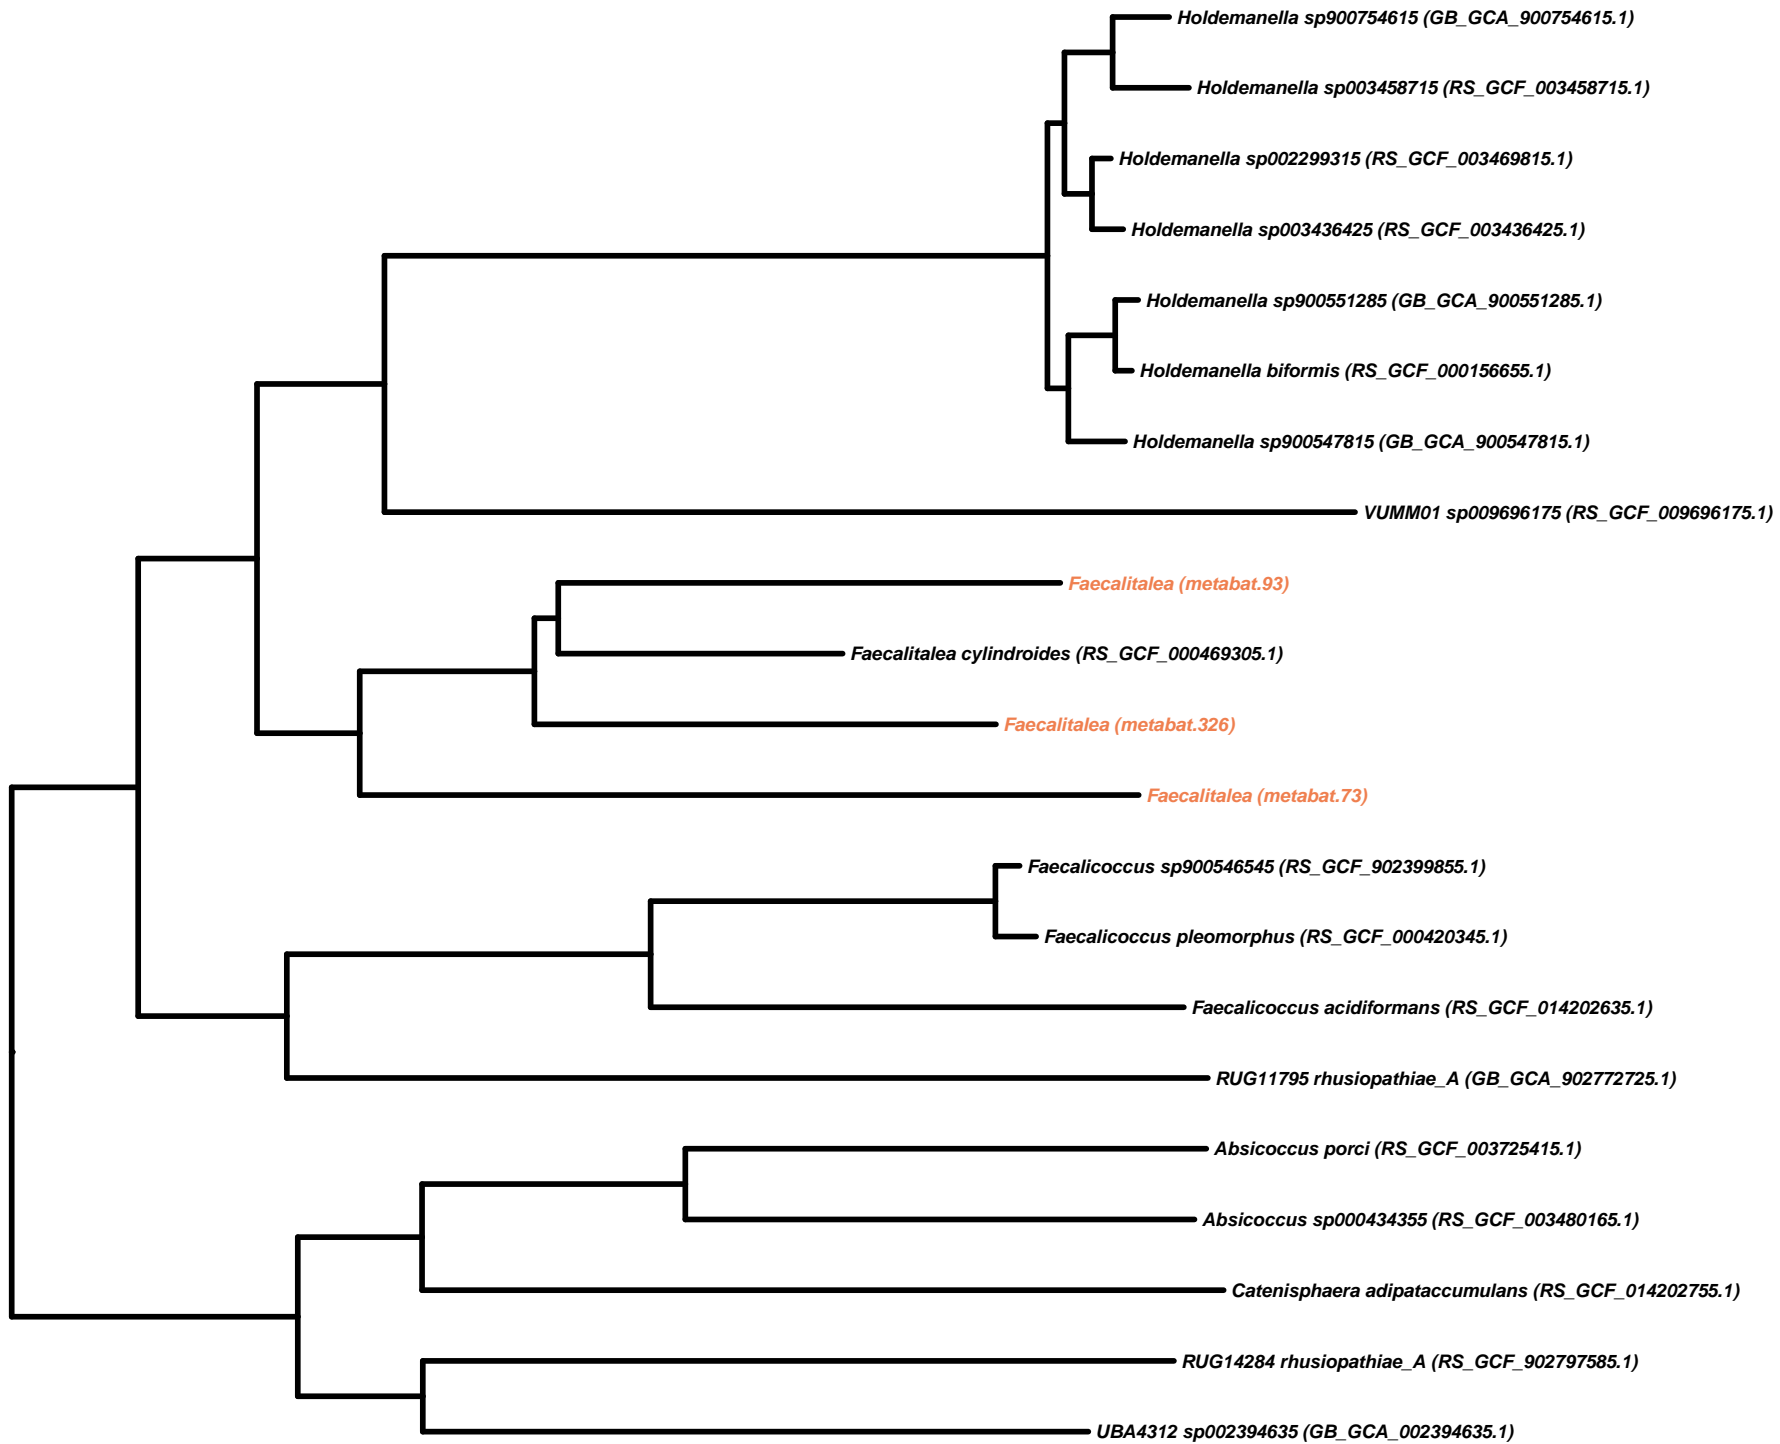





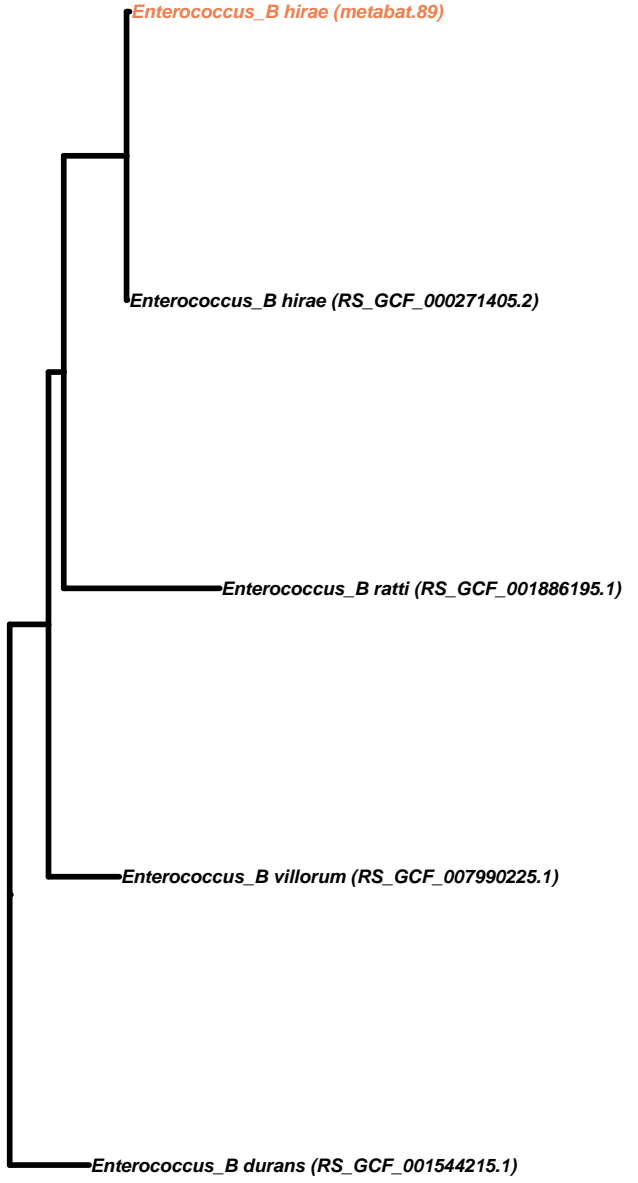

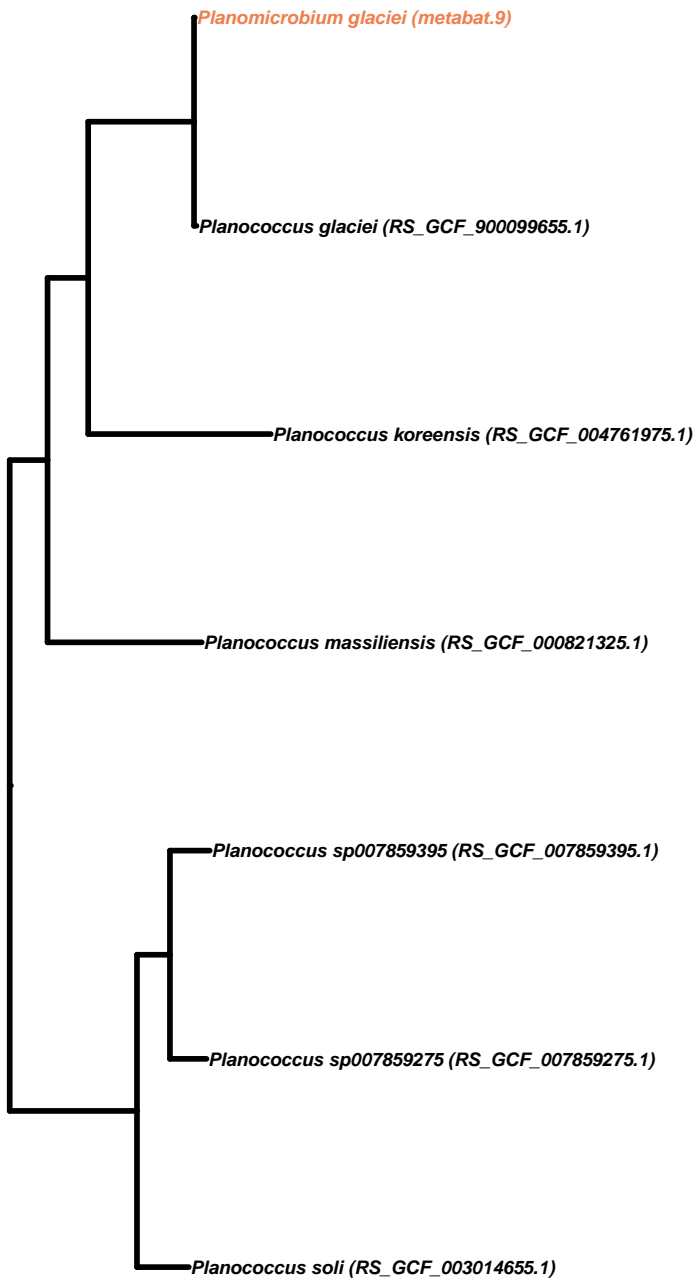

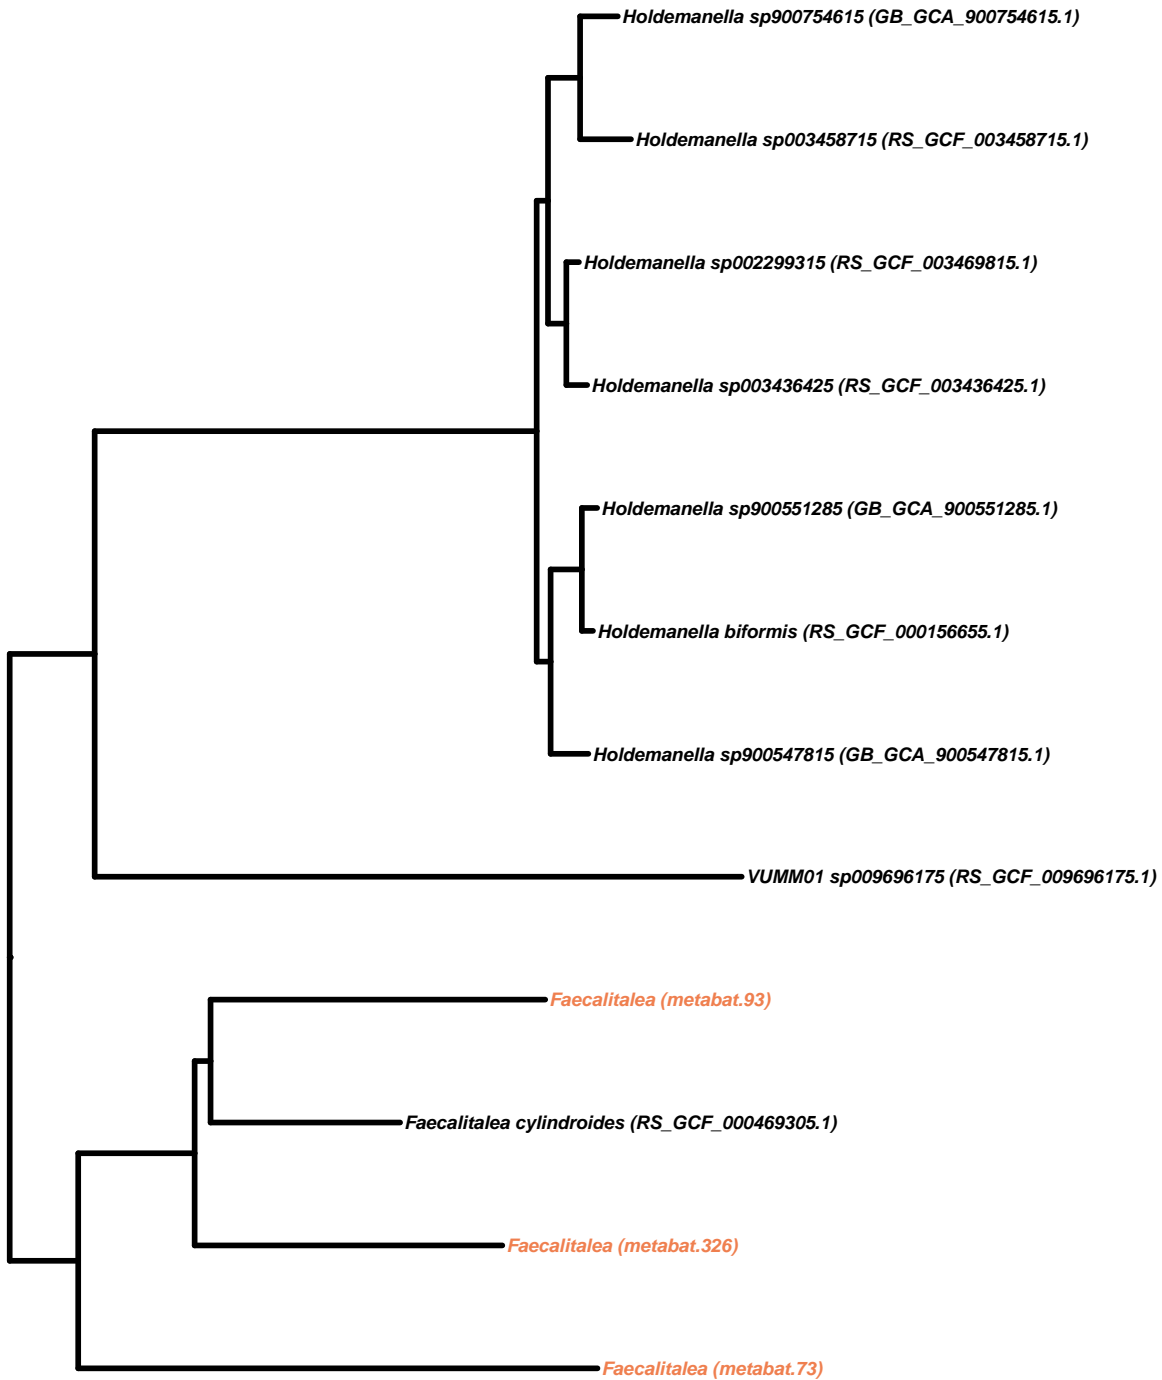

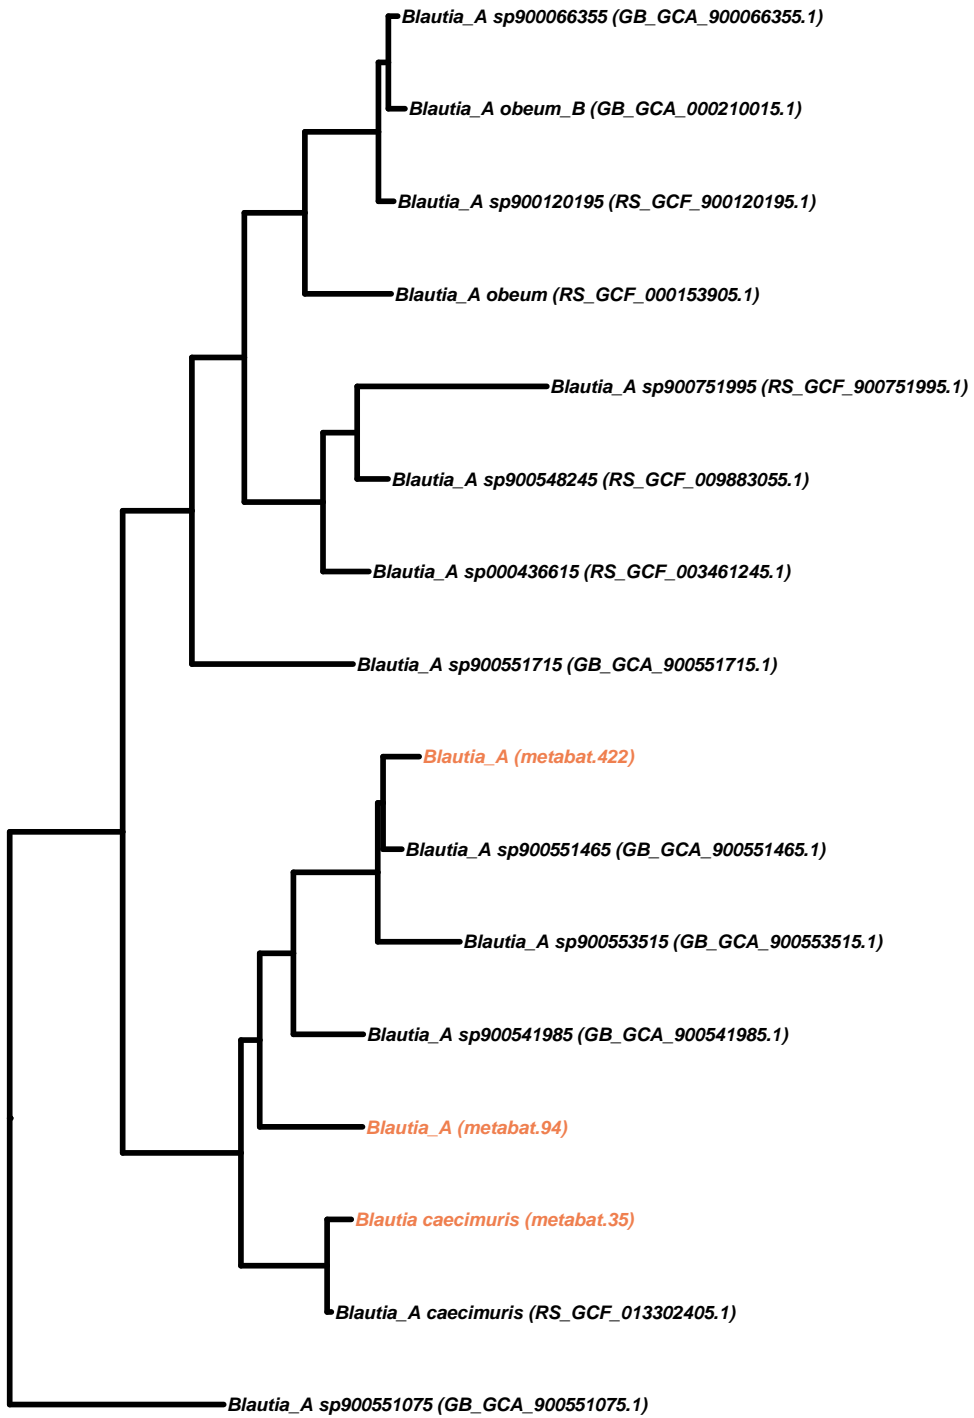

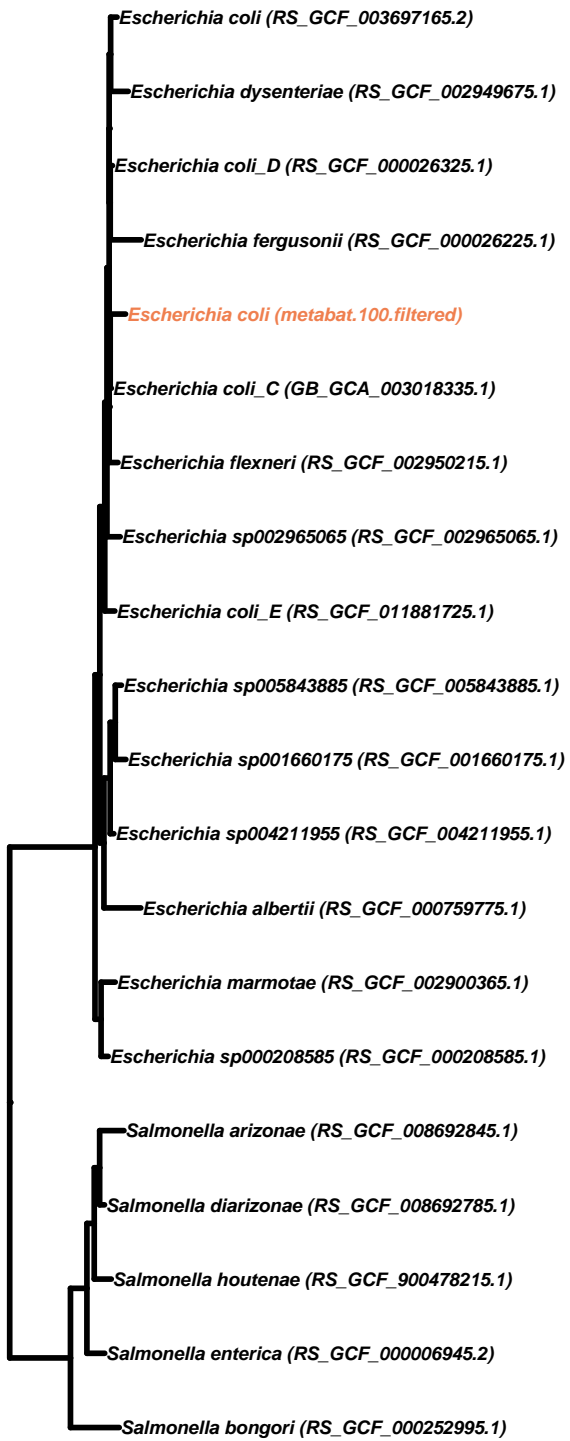

Supplement: msystems.00965-22-s0006.pdf [file msystems.00965-22-s0006.pdf]
