# Supplementary material for: Taxonomic, Genomic, and Functional Variation in the Gut Microbiomes of Wild Spotted Hyenas Across 2 Decades of Study
Source: PubMed Central journal article supplement (PMC9948708; doi:10.1128/msystems.00965-22), 2022-12-19

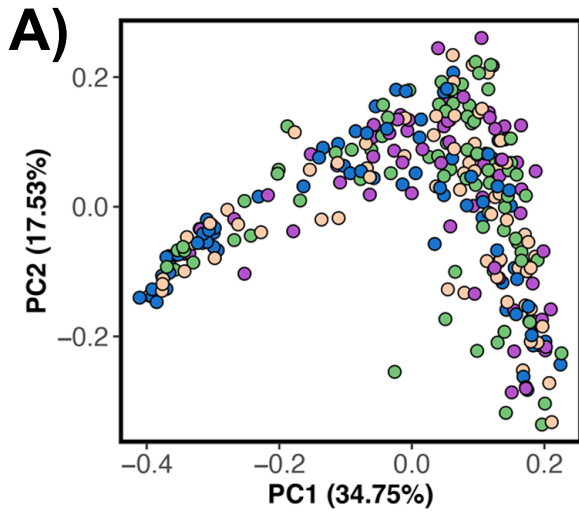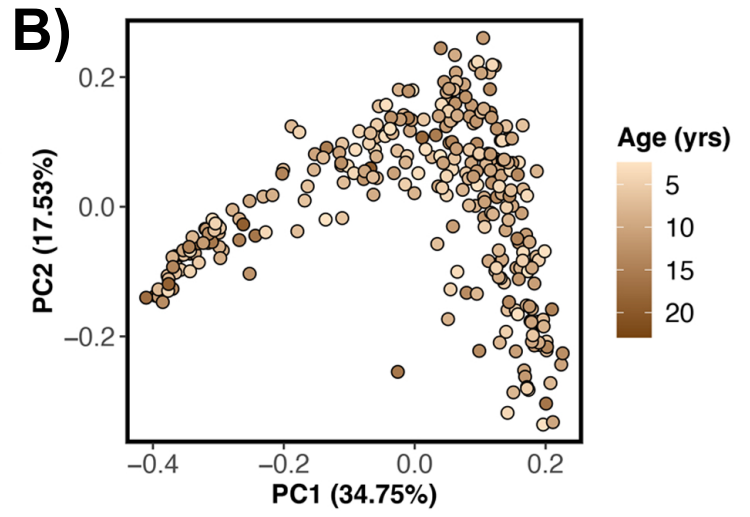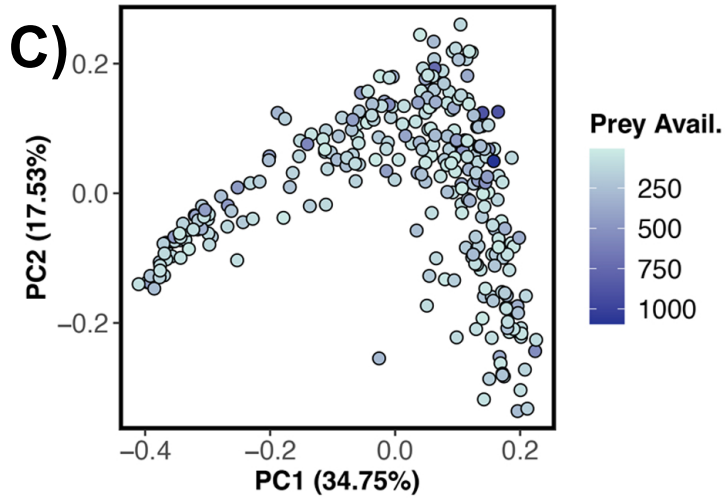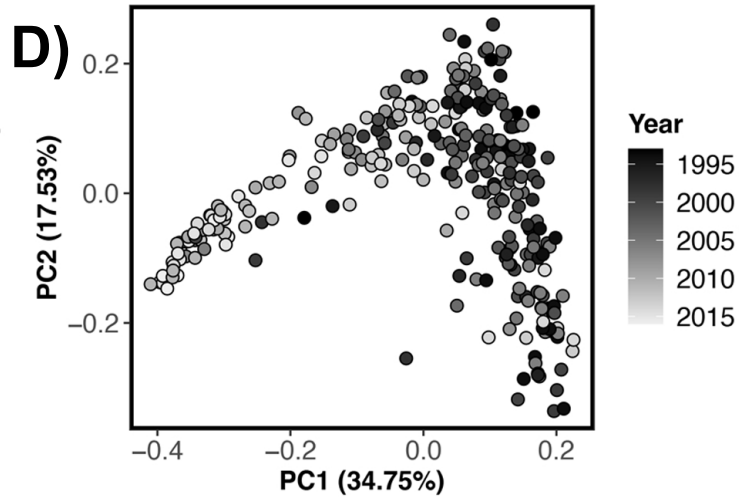

Supplement: msystems.00965-22-s0005.pdf [file msystems.00965-22-s0005.pdf]
